# Supplementary material for: Phanerosides A–X, Phenylpropanoid Esters of Sucrose from the Rattans of Phanera championii Benth
Source: MDPI journal article supplement (doi:10.3390/molecules28124767), 2023-06-14
Supplement: s1 [file s1]

# **Phanerosides A–X, Phenylpropanoid Esters of Sucrose from the Rattans of *Phanera championii* Benth.**

Ya-Jie Hu, Qian Lan, Bao-Jun Su, and Dong Liang\*

State Key Laboratory for Chemistry and Molecular Engineering of Medicinal Resources,  
Collaborative Innovation Center for Guangxi Ethnic Medicine, School of Chemistry and  
Pharmaceutical Sciences, Guangxi Normal University, Guilin 541004, People's Republic of China

\* Correspondence: liangdong@mailbox.gxnu.edu.cn, liangdonggxnu@163.com (D.L.)

## Figures of Contents

|                                                                                                          |    |
|----------------------------------------------------------------------------------------------------------|----|
| <b>Figure S1.</b> UV Spectrum of Compound <b>1</b> .....                                                 | 10 |
| <b>Figure S2.</b> IR (KBr disc) Spectrum of Compound <b>1</b> .....                                      | 10 |
| <b>Figure S3.</b> (+) HRESIMS Spectrum of Compound <b>1</b> .....                                        | 11 |
| <b>Figure S4.</b> $^1\text{H}$ NMR Spectrum of Compound <b>1</b> in $\text{MeOH-}d_4$ .....              | 11 |
| <b>Figure S5.</b> $^{13}\text{C}$ NMR Spectrum of Compound <b>1</b> in $\text{MeOH-}d_4$ .....           | 12 |
| <b>Figure S6.</b> $^1\text{H-}^1\text{H}$ COSY Spectrum of Compound <b>1</b> in $\text{MeOH-}d_4$ .....  | 12 |
| <b>Figure S7.</b> HSQC Spectrum of Compound <b>1</b> in $\text{MeOH-}d_4$ .....                          | 13 |
| <b>Figure S8.</b> HMBC Spectrum of Compound <b>1</b> in $\text{MeOH-}d_4$ .....                          | 13 |
| <b>Figure S9.</b> NOESY Spectrum of Compound <b>1</b> in $\text{MeOH-}d_4$ .....                         | 14 |
| <b>Figure S10.</b> Chiral-HPLC profile from acid hydrolysis of <b>1</b> compared to authentic standard   | 14 |
| <b>Figure S11.</b> UV Spectrum of Compound <b>2</b> .....                                                | 15 |
| <b>Figure S12.</b> IR (KBr disc) Spectrum of Compound <b>2</b> .....                                     | 15 |
| <b>Figure S13.</b> (+) HRESIMS Spectrum of Compound <b>2</b> .....                                       | 16 |
| <b>Figure S14.</b> $^1\text{H}$ NMR Spectrum of Compound <b>2</b> in $\text{MeOH-}d_4$ .....             | 16 |
| <b>Figure S15.</b> $^{13}\text{C}$ NMR Spectrum of Compound <b>2</b> in $\text{MeOH-}d_4$ .....          | 17 |
| <b>Figure S16.</b> $^1\text{H-}^1\text{H}$ COSY Spectrum of Compound <b>2</b> in $\text{MeOH-}d_4$ ..... | 17 |
| <b>Figure S17.</b> HSQC Spectrum of Compound <b>2</b> in $\text{MeOH-}d_4$ .....                         | 18 |
| <b>Figure S18.</b> HMBC Spectrum of Compound <b>2</b> in $\text{MeOH-}d_4$ .....                         | 18 |
| <b>Figure S19.</b> NOESY Spectrum of Compound <b>2</b> in $\text{MeOH-}d_4$ .....                        | 19 |
| <b>Figure S20.</b> UV Spectrum of Compound <b>3</b> .....                                                | 19 |
| <b>Figure S21.</b> IR (KBr disc) Spectrum of Compound <b>3</b> .....                                     | 20 |
| <b>Figure S22.</b> (+) HRESIMS Spectrum of Compound <b>3</b> .....                                       | 20 |
| <b>Figure S23.</b> $^1\text{H}$ NMR Spectrum of Compound <b>3</b> in $\text{MeOH-}d_4$ .....             | 21 |
| <b>Figure S24.</b> $^{13}\text{C}$ NMR Spectrum of Compound <b>3</b> in $\text{MeOH-}d_4$ .....          | 21 |
| <b>Figure S25.</b> $^1\text{H-}^1\text{H}$ COSY Spectrum of Compound <b>3</b> in $\text{MeOH-}d_4$ ..... | 22 |
| <b>Figure S26.</b> HSQC Spectrum of Compound <b>3</b> in $\text{MeOH-}d_4$ .....                         | 22 |
| <b>Figure S27.</b> HMBC Spectrum of Compound <b>3</b> in $\text{MeOH-}d_4$ .....                         | 23 |
| <b>Figure S28.</b> NOESY Spectrum of Compound <b>3</b> in $\text{MeOH-}d_4$ .....                        | 23 |
| <b>Figure S29.</b> UV Spectrum of Compound <b>4</b> .....                                                | 24 |



|                                                                                                          |    |
|----------------------------------------------------------------------------------------------------------|----|
| <b>Figure S30.</b> IR (KBr disc) Spectrum of Compound <b>4</b> .....                                     | 24 |
| <b>Figure S31.</b> (+) HRESIMS Spectrum of Compound <b>4</b> .....                                       | 25 |
| <b>Figure S32.</b> $^1\text{H}$ NMR Spectrum of Compound <b>4</b> in $\text{MeOH-}d_4$ .....             | 25 |
| <b>Figure S33.</b> $^{13}\text{C}$ NMR Spectrum of Compound <b>4</b> in $\text{MeOH-}d_4$ .....          | 26 |
| <b>Figure S34.</b> $^1\text{H-}^1\text{H}$ COSY Spectrum of Compound <b>4</b> in $\text{MeOH-}d_4$ ..... | 26 |
| <b>Figure S35.</b> HSQC Spectrum of Compound <b>4</b> in $\text{MeOH-}d_4$ .....                         | 27 |
| <b>Figure S36.</b> HMBC Spectrum of Compound <b>4</b> in $\text{MeOH-}d_4$ .....                         | 27 |
| <b>Figure S37.</b> NOESY Spectrum of Compound <b>4</b> in $\text{MeOH-}d_4$ .....                        | 28 |
| <b>Figure S38.</b> UV Spectrum of Compound <b>5</b> .....                                                | 28 |
| <b>Figure S39.</b> IR (KBr disc) Spectrum of Compound <b>5</b> .....                                     | 29 |
| <b>Figure S40.</b> (+) HRESIMS Spectrum of Compound <b>5</b> .....                                       | 29 |
| <b>Figure S41.</b> $^1\text{H}$ NMR Spectrum of Compound <b>5</b> in $\text{MeOH-}d_4$ .....             | 30 |
| <b>Figure S42.</b> $^{13}\text{C}$ NMR Spectrum of Compound <b>5</b> in $\text{MeOH-}d_4$ .....          | 30 |
| <b>Figure S43.</b> $^1\text{H-}^1\text{H}$ COSY Spectrum of Compound <b>5</b> in $\text{MeOH-}d_4$ ..... | 31 |
| <b>Figure S44.</b> HSQC Spectrum of Compound <b>5</b> in $\text{MeOH-}d_4$ .....                         | 31 |
| <b>Figure S45.</b> HMBC Spectrum of Compound <b>5</b> in $\text{MeOH-}d_4$ .....                         | 32 |
| <b>Figure S46.</b> NOESY Spectrum of Compound <b>5</b> in $\text{MeOH-}d_4$ .....                        | 32 |
| <b>Figure S47.</b> UV Spectrum of Compound <b>6</b> .....                                                | 33 |
| <b>Figure S48.</b> IR (KBr disc) Spectrum of Compound <b>6</b> .....                                     | 33 |
| <b>Figure S49.</b> (+) HRESIMS Spectrum of Compound <b>6</b> .....                                       | 34 |
| <b>Figure S50.</b> $^1\text{H}$ NMR Spectrum of Compound <b>6</b> in $\text{MeOH-}d_4$ .....             | 34 |
| <b>Figure S51.</b> $^{13}\text{C}$ NMR Spectrum of Compound <b>6</b> in $\text{MeOH-}d_4$ .....          | 35 |
| <b>Figure S52.</b> $^1\text{H-}^1\text{H}$ COSY Spectrum of Compound <b>6</b> in $\text{MeOH-}d_4$ ..... | 35 |
| <b>Figure S53.</b> HSQC Spectrum of Compound <b>6</b> in $\text{MeOH-}d_4$ .....                         | 36 |
| <b>Figure S54.</b> HMBC Spectrum of Compound <b>6</b> in $\text{MeOH-}d_4$ .....                         | 36 |
| <b>Figure S55.</b> NOESY Spectrum of Compound <b>6</b> in $\text{MeOH-}d_4$ .....                        | 37 |
| <b>Figure S56.</b> UV Spectrum of Compound <b>7</b> .....                                                | 37 |
| <b>Figure S57.</b> IR (KBr disc) Spectrum of Compound <b>7</b> .....                                     | 38 |
| <b>Figure S58.</b> (+) HRESIMS Spectrum of Compound <b>7</b> .....                                       | 38 |
| <b>Figure S59.</b> $^1\text{H}$ NMR Spectrum of Compound <b>7</b> in $\text{MeOH-}d_4$ .....             | 39 |
| <b>Figure S60.</b> $^{13}\text{C}$ NMR Spectrum of Compound <b>7</b> in $\text{MeOH-}d_4$ .....          | 39 |

|                                                                                                               |    |
|---------------------------------------------------------------------------------------------------------------|----|
| <b>Figure S61.</b> $^1\text{H}$ - $^1\text{H}$ COSY Spectrum of Compound <b>7</b> in $\text{MeOH-}d_4$ .....  | 40 |
| <b>Figure S62.</b> HSQC Spectrum of Compound <b>7</b> in $\text{MeOH-}d_4$ .....                              | 40 |
| <b>Figure S64.</b> NOESY Spectrum of Compound <b>7</b> in $\text{MeOH-}d_4$ .....                             | 41 |
| <b>Figure S65.</b> UV Spectrum of Compound <b>8</b> .....                                                     | 42 |
| <b>Figure S66.</b> IR (KBr disc) Spectrum of Compound <b>8</b> .....                                          | 42 |
| <b>Figure S67.</b> (+) HRESIMS Spectrum of Compound <b>8</b> .....                                            | 43 |
| <b>Figure S68.</b> $^1\text{H}$ NMR Spectrum of Compound <b>8</b> in $\text{MeOH-}d_4$ .....                  | 43 |
| <b>Figure S69.</b> $^{13}\text{C}$ NMR Spectrum of Compound <b>8</b> in $\text{MeOH-}d_4$ .....               | 44 |
| <b>Figure S70.</b> $^1\text{H}$ - $^1\text{H}$ COSY Spectrum of Compound <b>8</b> in $\text{MeOH-}d_4$ .....  | 44 |
| <b>Figure S71.</b> HSQC Spectrum of Compound <b>8</b> in $\text{MeOH-}d_4$ .....                              | 45 |
| <b>Figure S72.</b> HMBC Spectrum of Compound <b>8</b> in $\text{MeOH-}d_4$ .....                              | 45 |
| <b>Figure S73.</b> NOESY Spectrum of Compound <b>8</b> in $\text{MeOH-}d_4$ .....                             | 46 |
| <b>Figure S74.</b> UV Spectrum of Compound <b>9</b> .....                                                     | 46 |
| <b>Figure S75.</b> IR (KBr disc) Spectrum of Compound <b>9</b> .....                                          | 47 |
| <b>Figure S76.</b> (+) HRESIMS Spectrum of Compound <b>9</b> .....                                            | 47 |
| <b>Figure S77.</b> $^1\text{H}$ NMR Spectrum of Compound <b>9</b> in $\text{MeOH-}d_4$ .....                  | 48 |
| <b>Figure S78.</b> $^{13}\text{C}$ NMR Spectrum of Compound <b>9</b> in $\text{MeOH-}d_4$ .....               | 48 |
| <b>Figure S79.</b> $^1\text{H}$ - $^1\text{H}$ COSY Spectrum of Compound <b>9</b> in $\text{MeOH-}d_4$ .....  | 49 |
| <b>Figure S80.</b> HSQC Spectrum of Compound <b>9</b> in $\text{MeOH-}d_4$ .....                              | 49 |
| <b>Figure S81.</b> HMBC Spectrum of Compound <b>9</b> in $\text{MeOH-}d_4$ .....                              | 50 |
| <b>Figure S82.</b> NOESY Spectrum of Compound <b>9</b> in $\text{MeOH-}d_4$ .....                             | 50 |
| <b>Figure S83.</b> UV Spectrum of Compound <b>10</b> .....                                                    | 51 |
| <b>Figure S84.</b> IR (KBr disc) Spectrum of Compound <b>10</b> .....                                         | 51 |
| <b>Figure S85.</b> (+) HRESIMS Spectrum of Compound <b>10</b> .....                                           | 52 |
| <b>Figure S86.</b> $^1\text{H}$ NMR Spectrum of Compound <b>10</b> in $\text{MeOH-}d_4$ .....                 | 52 |
| <b>Figure S87.</b> $^{13}\text{C}$ NMR Spectrum of Compound <b>10</b> in $\text{MeOH-}d_4$ .....              | 53 |
| <b>Figure S88.</b> $^1\text{H}$ - $^1\text{H}$ COSY Spectrum of Compound <b>10</b> in $\text{MeOH-}d_4$ ..... | 53 |
| <b>Figure S89.</b> HSQC Spectrum of Compound <b>10</b> in $\text{MeOH-}d_4$ .....                             | 54 |
| <b>Figure S90.</b> HMBC Spectrum of Compound <b>10</b> in $\text{MeOH-}d_4$ .....                             | 54 |
| <b>Figure S91.</b> NOESY Spectrum of Compound <b>10</b> in $\text{MeOH-}d_4$ .....                            | 55 |
| <b>Figure S92.</b> UV Spectrum of Compound <b>11</b> .....                                                    | 55 |

|                                                                                                            |    |
|------------------------------------------------------------------------------------------------------------|----|
| <b>Figure S93.</b> IR (KBr disc) Spectrum of Compound <b>11</b> .....                                      | 56 |
| <b>Figure S94.</b> (+) HRESIMS Spectrum of Compound <b>11</b> .....                                        | 56 |
| <b>Figure S95.</b> $^1\text{H}$ NMR Spectrum of Compound <b>11</b> in $\text{MeOH-}d_4$ .....              | 57 |
| <b>Figure S96.</b> $^{13}\text{C}$ NMR Spectrum of Compound <b>11</b> in $\text{MeOH-}d_4$ .....           | 57 |
| <b>Figure S97.</b> $^1\text{H-}^1\text{H}$ COSY Spectrum of Compound <b>11</b> in $\text{MeOH-}d_4$ .....  | 58 |
| <b>Figure S98.</b> HSQC Spectrum of Compound <b>11</b> in $\text{MeOH-}d_4$ .....                          | 58 |
| <b>Figure S99.</b> HMBC Spectrum of Compound <b>11</b> in $\text{MeOH-}d_4$ .....                          | 59 |
| <b>Figure S100.</b> NOESY Spectrum of Compound <b>11</b> in $\text{MeOH-}d_4$ .....                        | 59 |
| <b>Figure S101.</b> UV Spectrum of Compound <b>12</b> .....                                                | 60 |
| <b>Figure S102.</b> IR (KBr disc) Spectrum of Compound <b>12</b> .....                                     | 60 |
| <b>Figure S103.</b> (+) HRESIMS Spectrum of Compound <b>12</b> .....                                       | 61 |
| <b>Figure S104.</b> $^1\text{H}$ NMR Spectrum of Compound <b>12</b> in $\text{MeOH-}d_4$ .....             | 61 |
| <b>Figure S105.</b> $^{13}\text{C}$ NMR Spectrum of Compound <b>12</b> in $\text{MeOH-}d_4$ .....          | 62 |
| <b>Figure S106.</b> $^1\text{H-}^1\text{H}$ COSY Spectrum of Compound <b>12</b> in $\text{MeOH-}d_4$ ..... | 62 |
| <b>Figure S107.</b> HSQC Spectrum of Compound <b>12</b> in $\text{MeOH-}d_4$ .....                         | 63 |
| <b>Figure S108.</b> HMBC Spectrum of Compound <b>12</b> in $\text{MeOH-}d_4$ .....                         | 63 |
| <b>Figure S109.</b> NOESY Spectrum of Compound <b>12</b> in $\text{MeOH-}d_4$ .....                        | 64 |
| <b>Figure S110.</b> UV Spectrum of Compound <b>13</b> .....                                                | 64 |
| <b>Figure S111.</b> IR (KBr disc) Spectrum of Compound <b>13</b> .....                                     | 65 |
| <b>Figure S112.</b> (+) HRESIMS Spectrum of Compound <b>13</b> .....                                       | 65 |
| <b>Figure S113.</b> $^1\text{H}$ NMR Spectrum of Compound <b>13</b> in $\text{MeOH-}d_4$ .....             | 66 |
| <b>Figure S114.</b> $^{13}\text{C}$ NMR Spectrum of Compound <b>13</b> in $\text{MeOH-}d_4$ .....          | 66 |
| <b>Figure S115.</b> $^1\text{H-}^1\text{H}$ COSY Spectrum of Compound <b>13</b> in $\text{MeOH-}d_4$ ..... | 67 |
| <b>Figure S116.</b> HSQC Spectrum of Compound <b>13</b> in $\text{MeOH-}d_4$ .....                         | 67 |
| <b>Figure S117.</b> HMBC Spectrum of Compound <b>13</b> in $\text{MeOH-}d_4$ .....                         | 68 |
| <b>Figure S118.</b> NOESY Spectrum of Compound <b>13</b> in $\text{MeOH-}d_4$ .....                        | 68 |
| <b>Figure S119.</b> UV Spectrum of Compound <b>14</b> .....                                                | 69 |
| <b>Figure S120.</b> IR (KBr disc) Spectrum of Compound <b>14</b> .....                                     | 69 |
| <b>Figure S121.</b> (+) HRESIMS Spectrum of Compound <b>14</b> .....                                       | 70 |
| <b>Figure S122.</b> $^1\text{H}$ NMR Spectrum of Compound <b>14</b> in $\text{MeOH-}d_4$ .....             | 70 |
| <b>Figure S123.</b> $^{13}\text{C}$ NMR Spectrum of Compound <b>14</b> in $\text{MeOH-}d_4$ .....          | 71 |

|                                                                                                                |    |
|----------------------------------------------------------------------------------------------------------------|----|
| <b>Figure S124.</b> $^1\text{H}$ - $^1\text{H}$ COSY Spectrum of Compound <b>14</b> in $\text{MeOH-}d_4$ ..... | 71 |
| <b>Figure S125.</b> HSQC Spectrum of Compound <b>14</b> in $\text{MeOH-}d_4$ .....                             | 72 |
| <b>Figure S126.</b> HMBC Spectrum of Compound <b>14</b> in $\text{MeOH-}d_4$ .....                             | 72 |
| <b>Figure S127.</b> NOESY Spectrum of Compound <b>14</b> in $\text{MeOH-}d_4$ .....                            | 73 |
| <b>Figure S128.</b> UV Spectrum of Compound <b>15</b> .....                                                    | 73 |
| <b>Figure S129.</b> IR (KBr disc) Spectrum of Compound <b>15</b> .....                                         | 74 |
| <b>Figure S130.</b> (+) HRESIMS Spectrum of Compound <b>15</b> .....                                           | 74 |
| <b>Figure S131.</b> $^1\text{H}$ NMR Spectrum of Compound <b>15</b> in $\text{MeOH-}d_4$ .....                 | 75 |
| <b>Figure S132.</b> $^{13}\text{C}$ NMR Spectrum of Compound <b>15</b> in $\text{MeOH-}d_4$ .....              | 75 |
| <b>Figure S133.</b> $^1\text{H}$ - $^1\text{H}$ COSY Spectrum of Compound <b>15</b> in $\text{MeOH-}d_4$ ..... | 76 |
| <b>Figure S134.</b> HSQC Spectrum of Compound <b>15</b> in $\text{MeOH-}d_4$ .....                             | 76 |
| <b>Figure S135.</b> HMBC Spectrum of Compound <b>15</b> in $\text{MeOH-}d_4$ .....                             | 77 |
| <b>Figure S136.</b> NOESY Spectrum of Compound <b>15</b> in $\text{MeOH-}d_4$ .....                            | 77 |
| <b>Figure S137.</b> UV Spectrum of Compound <b>16</b> .....                                                    | 78 |
| <b>Figure S138.</b> IR (KBr disc) Spectrum of Compound <b>16</b> .....                                         | 78 |
| <b>Figure S139.</b> (+) HRESIMS Spectrum of Compound <b>16</b> .....                                           | 79 |
| <b>Figure S140.</b> $^1\text{H}$ NMR Spectrum of Compound <b>16</b> in $\text{MeOH-}d_4$ .....                 | 79 |
| <b>Figure S141.</b> $^{13}\text{C}$ NMR Spectrum of Compound <b>16</b> in $\text{MeOH-}d_4$ .....              | 80 |
| <b>Figure S142.</b> $^1\text{H}$ - $^1\text{H}$ COSY Spectrum of Compound <b>16</b> in $\text{MeOH-}d_4$ ..... | 80 |
| <b>Figure S143.</b> HSQC Spectrum of Compound <b>16</b> in $\text{MeOH-}d_4$ .....                             | 81 |
| <b>Figure S144.</b> HMBC Spectrum of Compound <b>16</b> in $\text{MeOH-}d_4$ .....                             | 81 |
| <b>Figure S145.</b> NOESY Spectrum of Compound <b>16</b> in $\text{MeOH-}d_4$ .....                            | 82 |
| <b>Figure S146.</b> UV Spectrum of Compound <b>17</b> .....                                                    | 82 |
| <b>Figure S147.</b> IR (KBr disc) Spectrum of Compound <b>17</b> .....                                         | 83 |
| <b>Figure S148.</b> (+) HRESIMS Spectrum of Compound <b>17</b> .....                                           | 83 |
| <b>Figure S149.</b> $^1\text{H}$ NMR Spectrum of Compound <b>17</b> in $\text{MeOH-}d_4$ .....                 | 84 |
| <b>Figure S150.</b> $^{13}\text{C}$ NMR Spectrum of Compound <b>17</b> in $\text{MeOH-}d_4$ .....              | 84 |
| <b>Figure S151.</b> $^1\text{H}$ - $^1\text{H}$ COSY Spectrum of Compound <b>17</b> in $\text{MeOH-}d_4$ ..... | 85 |
| <b>Figure S152.</b> HSQC Spectrum of Compound <b>17</b> in $\text{MeOH-}d_4$ .....                             | 85 |
| <b>Figure S153.</b> HMBC Spectrum of Compound <b>17</b> in $\text{MeOH-}d_4$ .....                             | 86 |
| <b>Figure S154.</b> NOESY Spectrum of Compound <b>17</b> in $\text{MeOH-}d_4$ .....                            | 86 |

|                                                                                                            |     |
|------------------------------------------------------------------------------------------------------------|-----|
| <b>Figure S155.</b> UV Spectrum of Compound <b>18</b> .....                                                | 87  |
| <b>Figure S156.</b> IR (KBr disc) Spectrum of Compound <b>18</b> .....                                     | 87  |
| <b>Figure S157.</b> (+) HRESIMS Spectrum of Compound <b>18</b> .....                                       | 88  |
| <b>Figure S158.</b> $^1\text{H}$ NMR Spectrum of Compound <b>18</b> in $\text{MeOH-}d_4$ .....             | 88  |
| <b>Figure S159.</b> $^{13}\text{C}$ NMR Spectrum of Compound <b>18</b> in $\text{MeOH-}d_4$ .....          | 89  |
| <b>Figure S160.</b> $^1\text{H-}^1\text{H}$ COSY Spectrum of Compound <b>18</b> in $\text{MeOH-}d_4$ ..... | 89  |
| <b>Figure S161.</b> HSQC Spectrum of Compound <b>18</b> in $\text{MeOH-}d_4$ .....                         | 90  |
| <b>Figure S162.</b> HMBC Spectrum of Compound <b>18</b> in $\text{MeOH-}d_4$ .....                         | 90  |
| <b>Figure S163.</b> NOESY Spectrum of Compound <b>18</b> in $\text{MeOH-}d_4$ .....                        | 91  |
| <b>Figure S164.</b> UV Spectrum of Compound <b>19</b> .....                                                | 91  |
| <b>Figure S165.</b> IR (KBr disc) Spectrum of Compound <b>19</b> .....                                     | 92  |
| <b>Figure S166.</b> (+) HRESIMS Spectrum of Compound <b>19</b> .....                                       | 92  |
| <b>Figure S167.</b> $^1\text{H}$ NMR Spectrum of Compound <b>19</b> in $\text{MeOH-}d_4$ .....             | 93  |
| <b>Figure S168.</b> $^{13}\text{C}$ NMR Spectrum of Compound <b>19</b> in $\text{MeOH-}d_4$ .....          | 93  |
| <b>Figure S169.</b> $^1\text{H-}^1\text{H}$ COSY Spectrum of Compound <b>19</b> in $\text{MeOH-}d_4$ ..... | 94  |
| <b>Figure S170.</b> HSQC Spectrum of Compound <b>19</b> in $\text{MeOH-}d_4$ .....                         | 94  |
| <b>Figure S171.</b> HMBC Spectrum of Compound <b>19</b> in $\text{MeOH-}d_4$ .....                         | 95  |
| <b>Figure S172.</b> NOESY Spectrum of Compound <b>19</b> in $\text{MeOH-}d_4$ .....                        | 95  |
| <b>Figure S173.</b> UV Spectrum of Compound <b>20</b> .....                                                | 96  |
| <b>Figure S174.</b> IR (KBr disc) Spectrum of Compound <b>20</b> .....                                     | 96  |
| <b>Figure S175.</b> (+) HRESIMS Spectrum of Compound <b>20</b> .....                                       | 97  |
| <b>Figure S176.</b> $^1\text{H}$ NMR Spectrum of Compound <b>20</b> in $\text{MeOH-}d_4$ .....             | 97  |
| <b>Figure S177.</b> $^{13}\text{C}$ NMR Spectrum of Compound <b>20</b> in $\text{MeOH-}d_4$ .....          | 98  |
| <b>Figure S178.</b> $^1\text{H-}^1\text{H}$ COSY Spectrum of Compound <b>20</b> in $\text{MeOH-}d_4$ ..... | 98  |
| <b>Figure S179.</b> HSQC Spectrum of Compound <b>20</b> in $\text{MeOH-}d_4$ .....                         | 99  |
| <b>Figure S180.</b> HMBC Spectrum of Compound <b>20</b> in $\text{MeOH-}d_4$ .....                         | 99  |
| <b>Figure S181.</b> NOESY Spectrum of Compound <b>20</b> in $\text{MeOH-}d_4$ .....                        | 100 |
| <b>Figure S182.</b> UV Spectrum of Compound <b>21</b> .....                                                | 100 |
| <b>Figure S183.</b> IR (KBr disc) Spectrum of Compound <b>21</b> .....                                     | 101 |
| <b>Figure S184.</b> (+) HRESIMS Spectrum of Compound <b>21</b> .....                                       | 101 |
| <b>Figure S185.</b> $^1\text{H}$ NMR Spectrum of Compound <b>21</b> in $\text{MeOH-}d_4$ .....             | 102 |

|                                                                                                            |     |
|------------------------------------------------------------------------------------------------------------|-----|
| <b>Figure S186.</b> $^{13}\text{C}$ NMR Spectrum of Compound <b>21</b> in $\text{MeOH-}d_4$ .....          | 102 |
| <b>Figure S187.</b> $^1\text{H-}^1\text{H}$ COSY Spectrum of Compound <b>21</b> in $\text{MeOH-}d_4$ ..... | 103 |
| <b>Figure S188.</b> HSQC Spectrum of Compound <b>21</b> in $\text{MeOH-}d_4$ .....                         | 103 |
| <b>Figure S189.</b> HMBC Spectrum of Compound <b>21</b> in $\text{MeOH-}d_4$ .....                         | 104 |
| <b>Figure S190.</b> NOESY Spectrum of Compound <b>21</b> in $\text{MeOH-}d_4$ .....                        | 104 |
| <b>Figure S191.</b> UV Spectrum of Compound <b>22</b> .....                                                | 105 |
| <b>Figure S192.</b> IR (KBr disc) Spectrum of Compound <b>22</b> .....                                     | 105 |
| <b>Figure S193.</b> (+) HRESIMS Spectrum of Compound <b>22</b> .....                                       | 106 |
| <b>Figure S194.</b> $^1\text{H}$ NMR Spectrum of Compound <b>22</b> in $\text{MeOH-}d_4$ .....             | 106 |
| <b>Figure S195.</b> $^{13}\text{C}$ NMR Spectrum of Compound <b>22</b> in $\text{MeOH-}d_4$ .....          | 107 |
| <b>Figure S196.</b> $^1\text{H-}^1\text{H}$ COSY Spectrum of Compound <b>22</b> in $\text{MeOH-}d_4$ ..... | 107 |
| <b>Figure S197.</b> HSQC Spectrum of Compound <b>22</b> in $\text{MeOH-}d_4$ .....                         | 108 |
| <b>Figure S198.</b> HMBC Spectrum of Compound <b>22</b> in $\text{MeOH-}d_4$ .....                         | 108 |
| <b>Figure S199.</b> NOESY Spectrum of Compound <b>22</b> in $\text{MeOH-}d_4$ .....                        | 109 |
| <b>Figure S200.</b> UV Spectrum of Compound <b>23</b> .....                                                | 109 |
| <b>Figure S201.</b> IR (KBr disc) Spectrum of Compound <b>23</b> .....                                     | 110 |
| <b>Figure S202.</b> (+) HRESIMS Spectrum of Compound <b>23</b> .....                                       | 110 |
| <b>Figure S203.</b> $^1\text{H}$ NMR Spectrum of Compound <b>23</b> in $\text{MeOH-}d_4$ .....             | 111 |
| <b>Figure S204.</b> $^{13}\text{C}$ NMR Spectrum of Compound <b>23</b> in $\text{MeOH-}d_4$ .....          | 111 |
| <b>Figure S205.</b> $^1\text{H-}^1\text{H}$ COSY Spectrum of Compound <b>23</b> in $\text{MeOH-}d_4$ ..... | 112 |
| <b>Figure S206.</b> HSQC Spectrum of Compound <b>23</b> in $\text{MeOH-}d_4$ .....                         | 112 |
| <b>Figure S207.</b> HMBC Spectrum of Compound <b>23</b> in $\text{MeOH-}d_4$ .....                         | 113 |
| <b>Figure S208.</b> NOESY Spectrum of Compound <b>23</b> in $\text{MeOH-}d_4$ .....                        | 113 |
| <b>Figure S209.</b> UV Spectrum of Compound <b>24</b> .....                                                | 114 |
| <b>Figure S210.</b> IR (KBr disc) Spectrum of Compound <b>24</b> .....                                     | 114 |
| <b>Figure S211.</b> (+) HRESIMS Spectrum of Compound <b>24</b> .....                                       | 115 |
| <b>Figure S212.</b> $^1\text{H}$ NMR Spectrum of Compound <b>24</b> in $\text{MeOH-}d_4$ .....             | 115 |
| <b>Figure S213.</b> $^{13}\text{C}$ NMR Spectrum of Compound <b>24</b> in $\text{MeOH-}d_4$ .....          | 116 |
| <b>Figure S214.</b> $^1\text{H-}^1\text{H}$ COSY Spectrum of Compound <b>24</b> in $\text{MeOH-}d_4$ ..... | 116 |
| <b>Figure S215.</b> HSQC Spectrum of Compound <b>24</b> in $\text{MeOH-}d_4$ .....                         | 117 |
| <b>Figure S216.</b> HMBC Spectrum of Compound <b>24</b> in $\text{MeOH-}d_4$ .....                         | 117 |

**Figure S217.** NOESY Spectrum of Compound **24** in MeOH- $d_4$  ..... 118

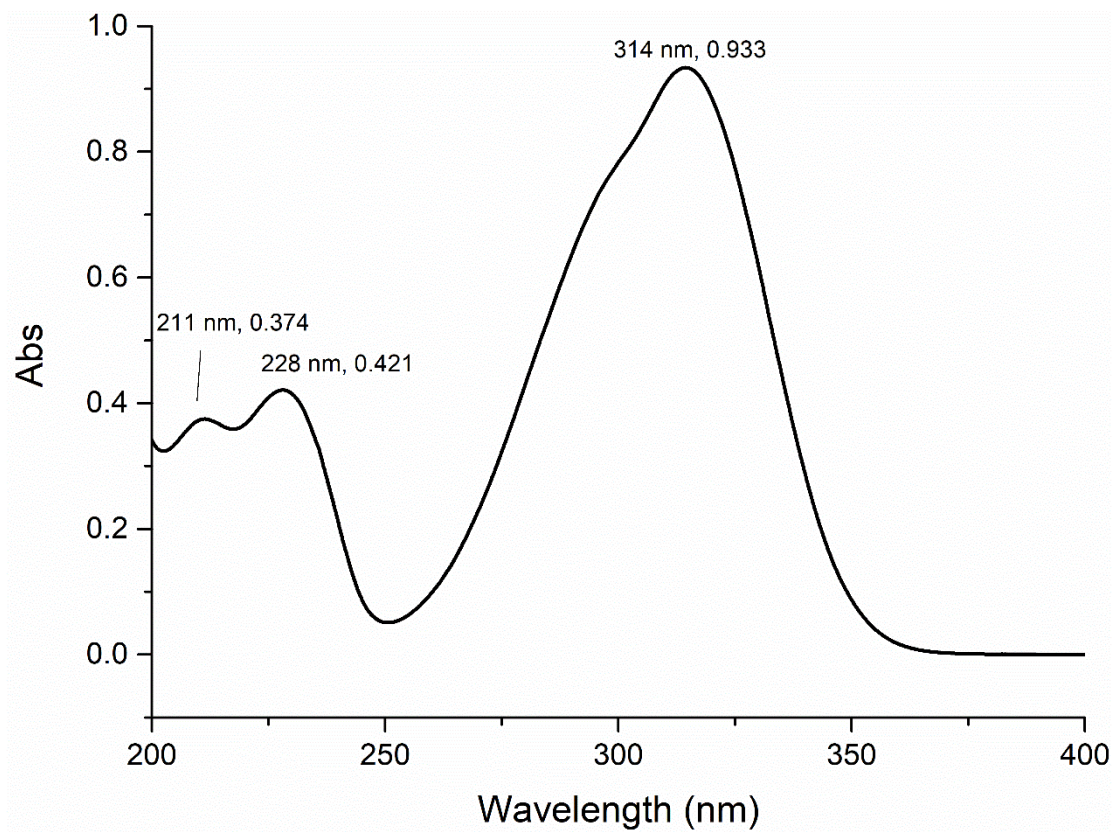

**Figure S1.** UV Spectrum of Compound **1**

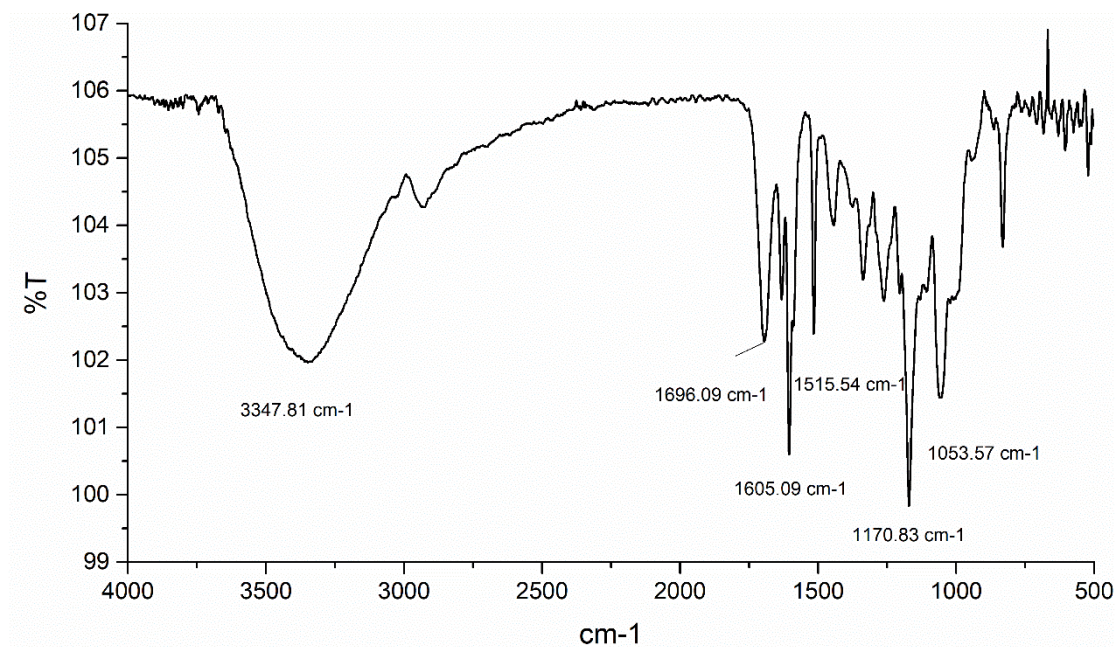

**Figure S2.** IR (KBr disc) Spectrum of Compound **1**



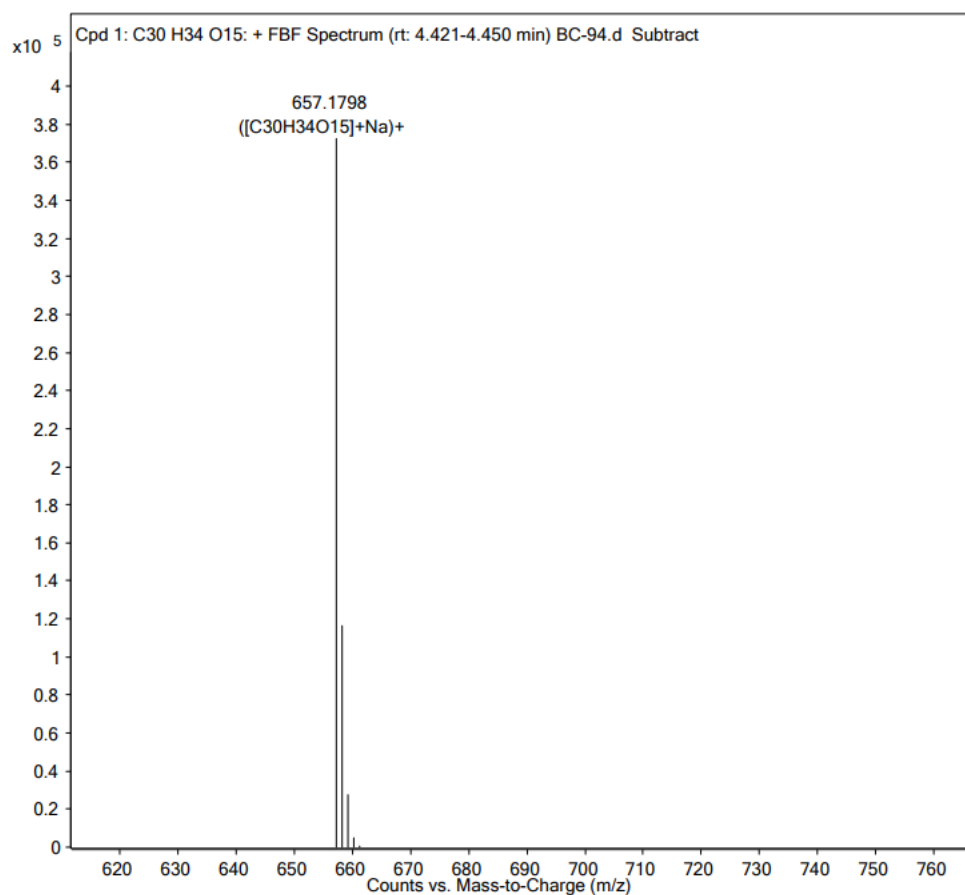

**Figure S3. (+) HRESIMS Spectrum of Compound 1**

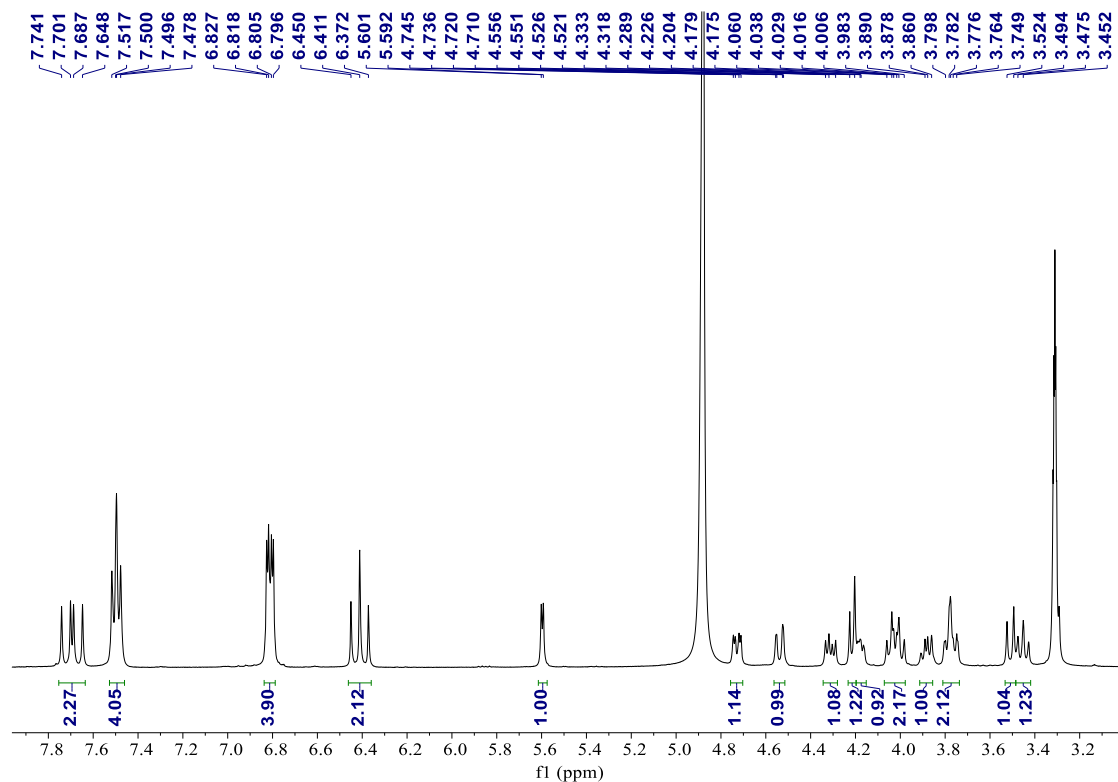

**Figure S4. <sup>1</sup>H NMR Spectrum of Compound 1 in MeOH-*d*<sub>4</sub>**

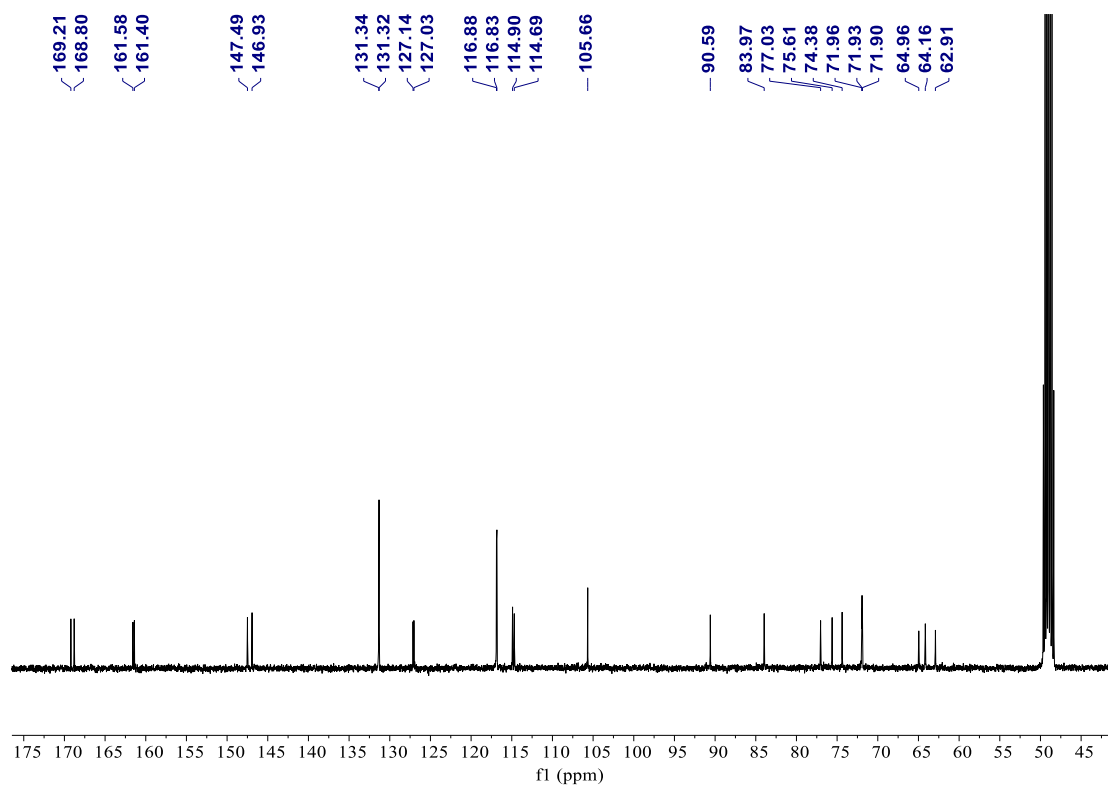

**Figure S5.**  $^{13}\text{C}$  NMR Spectrum of Compound **1** in  $\text{MeOH-}d_4$

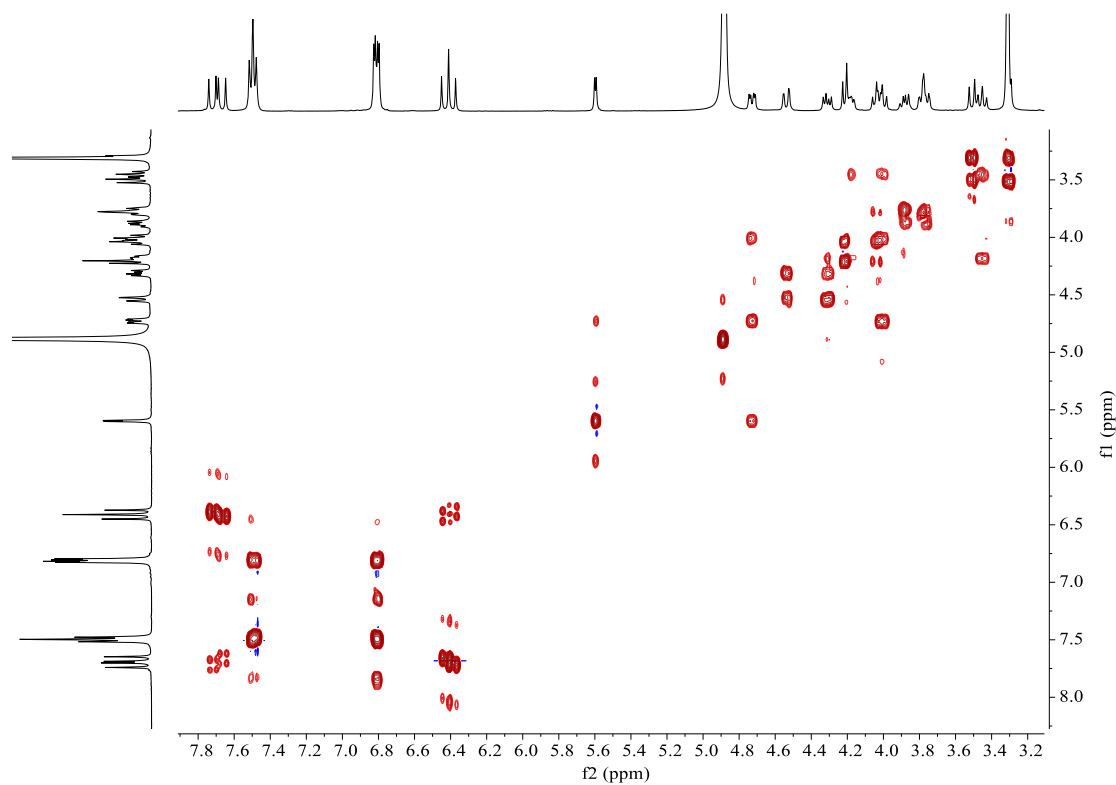

**Figure S6.**  $^1\text{H}$ – $^1\text{H}$  COSY Spectrum of Compound **1** in  $\text{MeOH-}d_4$

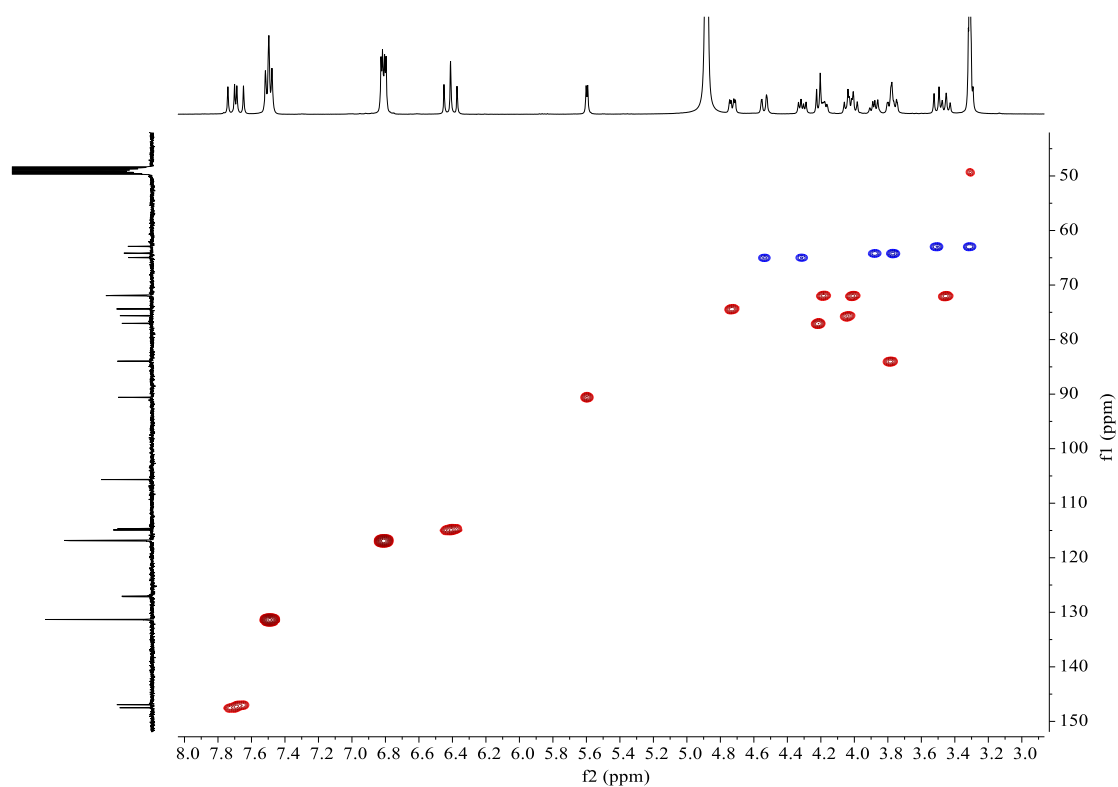

**Figure S7.** HSQC Spectrum of Compound **1** in MeOH- $d_4$

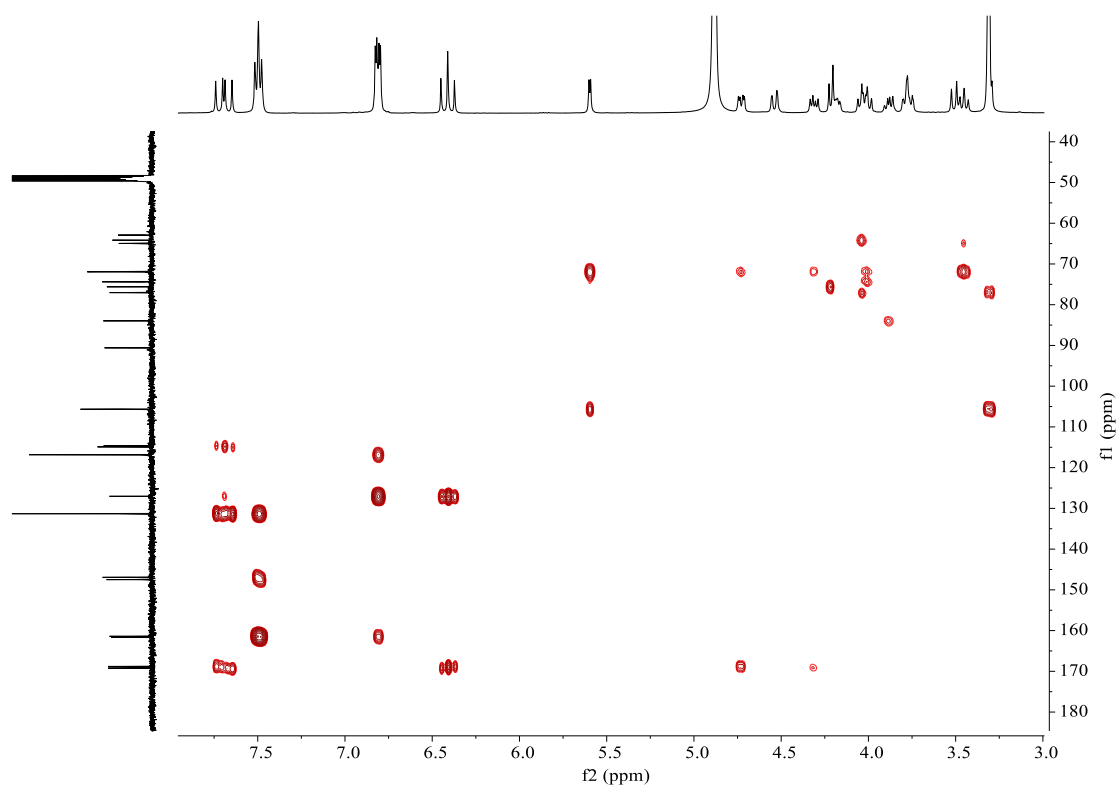

**Figure S8.** HMBC Spectrum of Compound **1** in MeOH- $d_4$

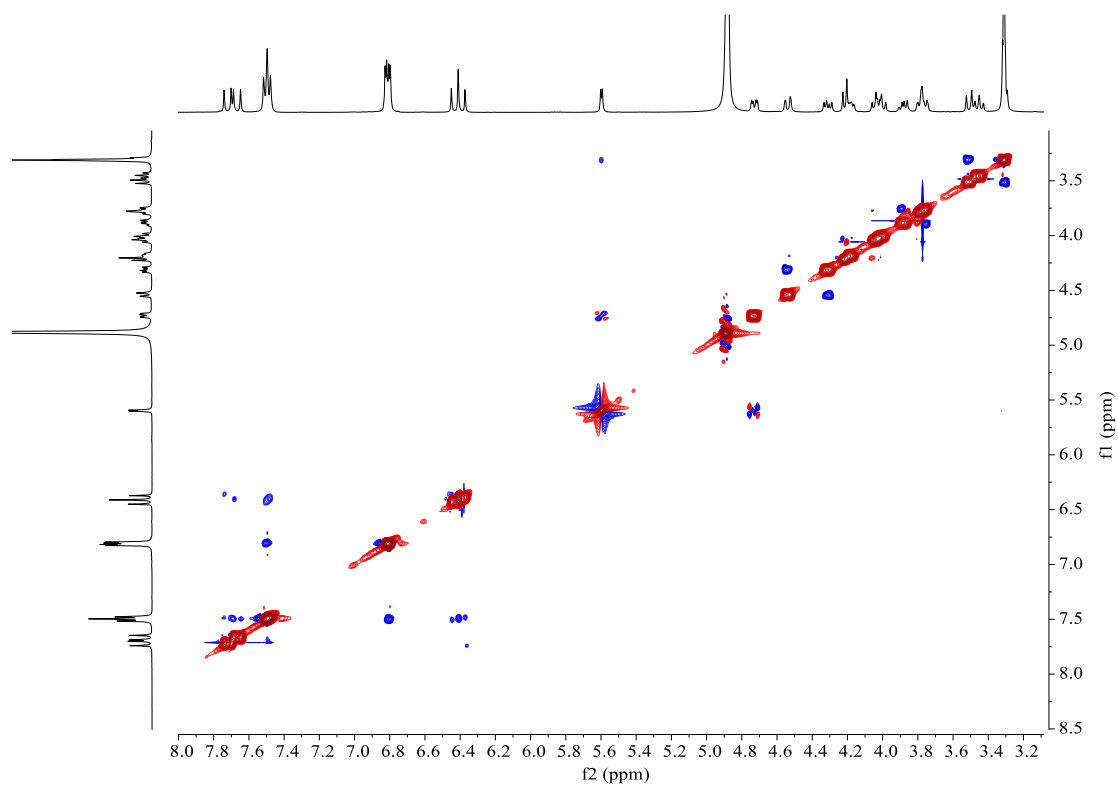

**Figure S9.** NOESY Spectrum of Compound **1** in MeOH- $d_4$

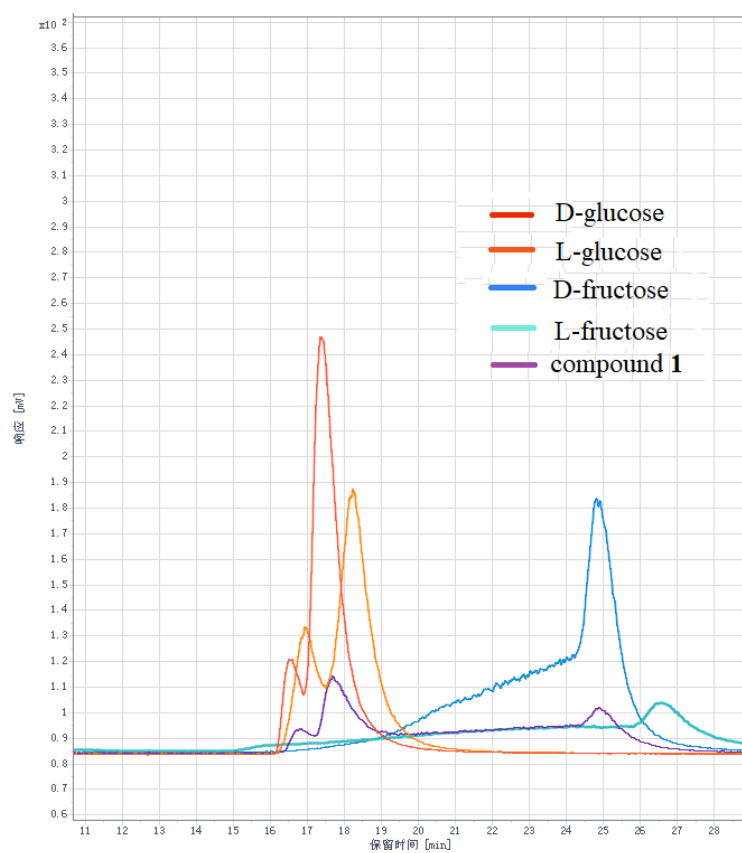

**Figure S10.** Chiral-HPLC profile from acid hydrolysis of **1** compared to authentic standard

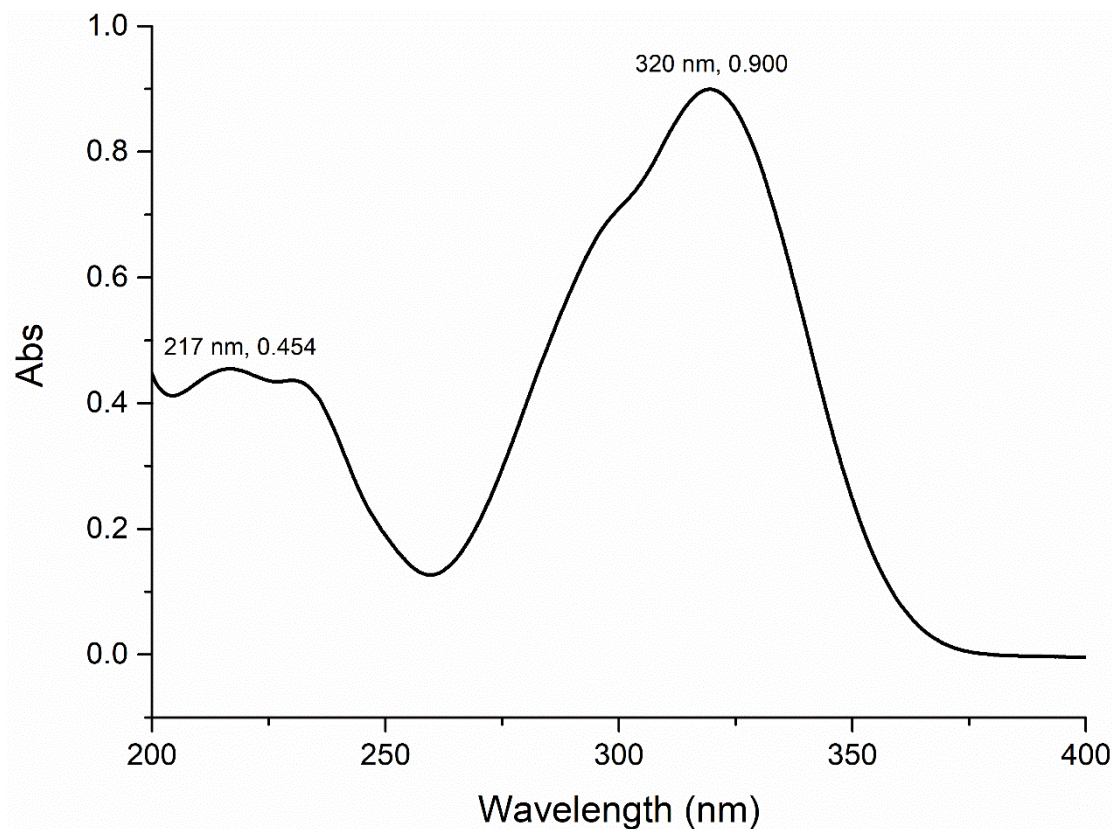

**Figure S11.** UV Spectrum of Compound 2

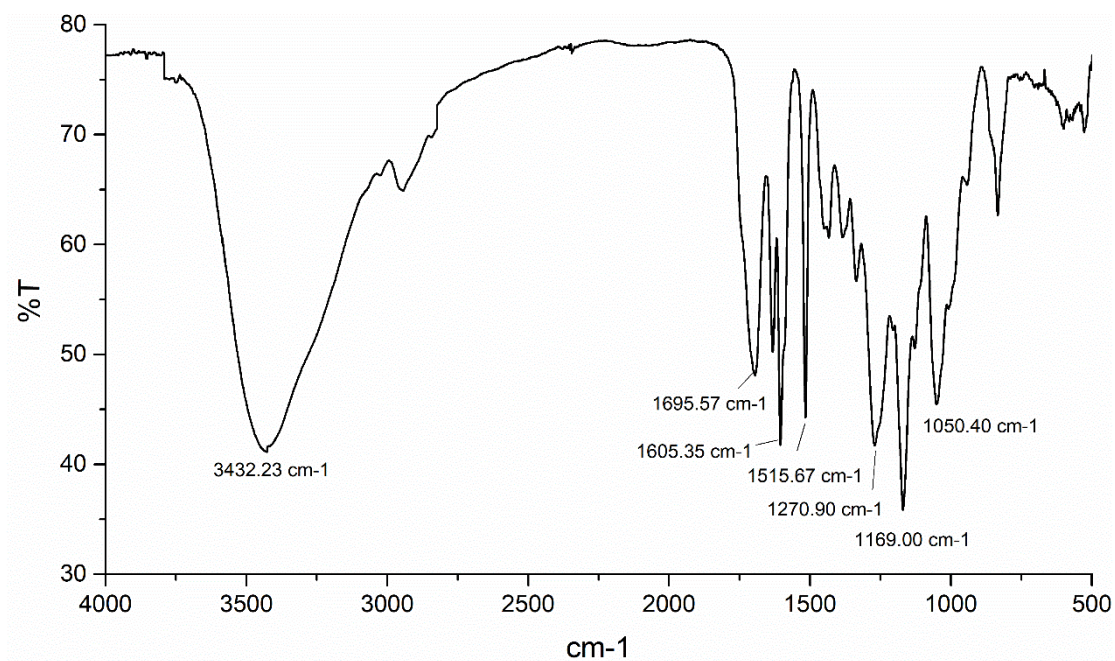

**Figure S12.** IR (KBr disc) Spectrum of Compound 2

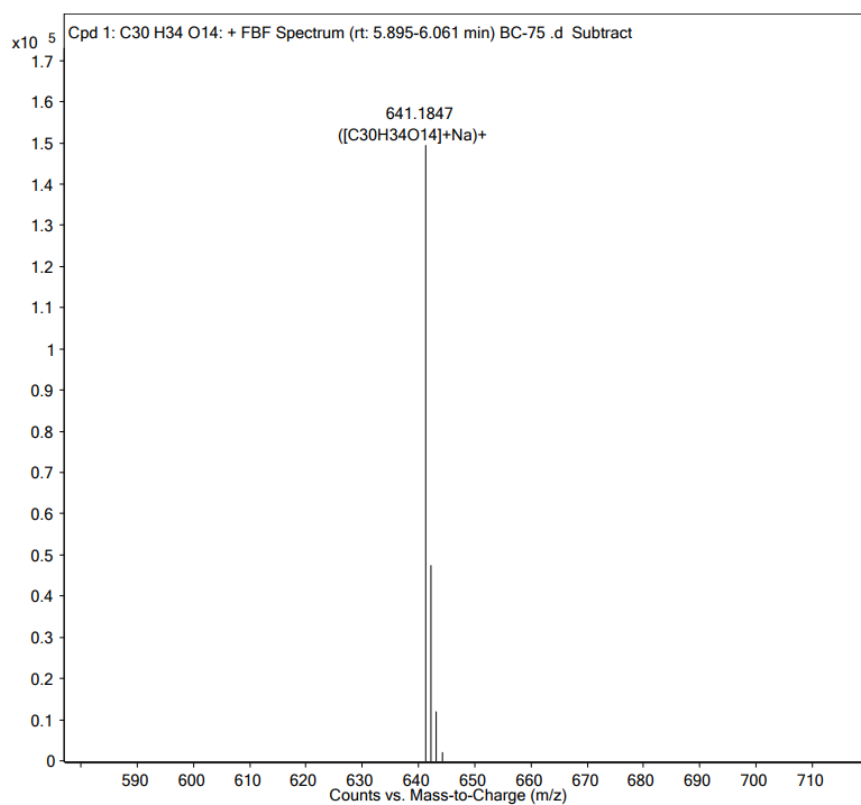

**Figure S13. (+) HRESIMS Spectrum of Compound 2**

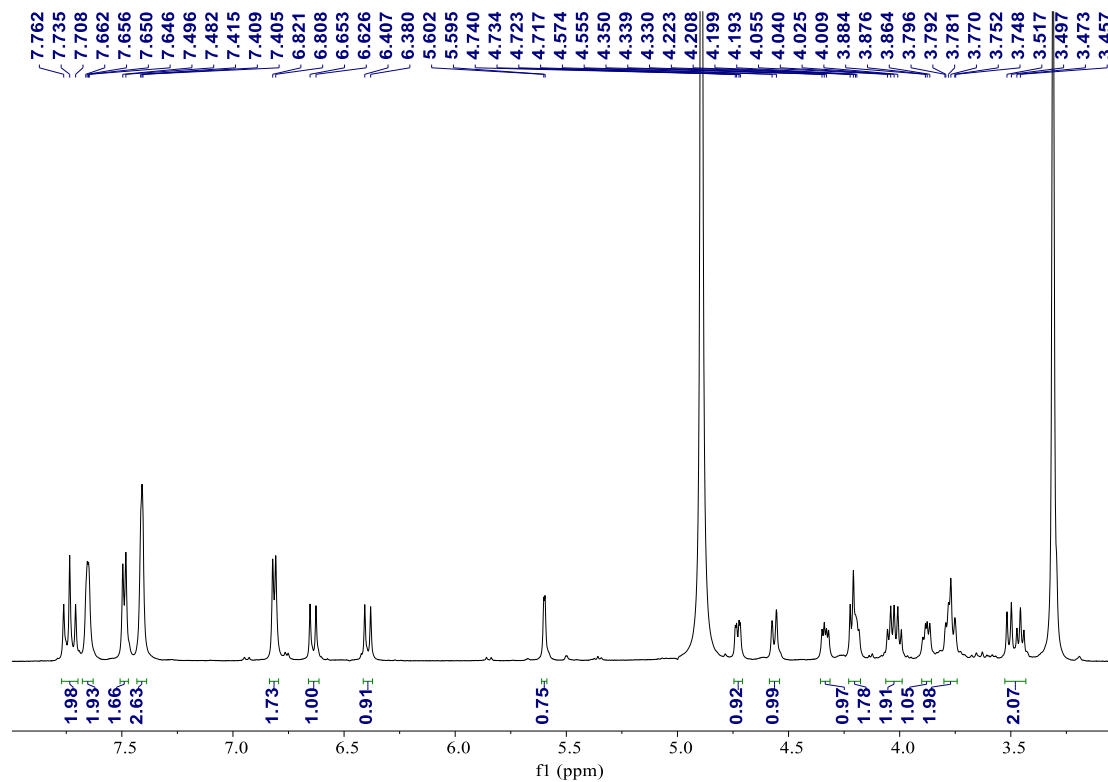

**Figure S14. <sup>1</sup>H NMR Spectrum of Compound 2 in MeOH-*d*<sub>4</sub>**

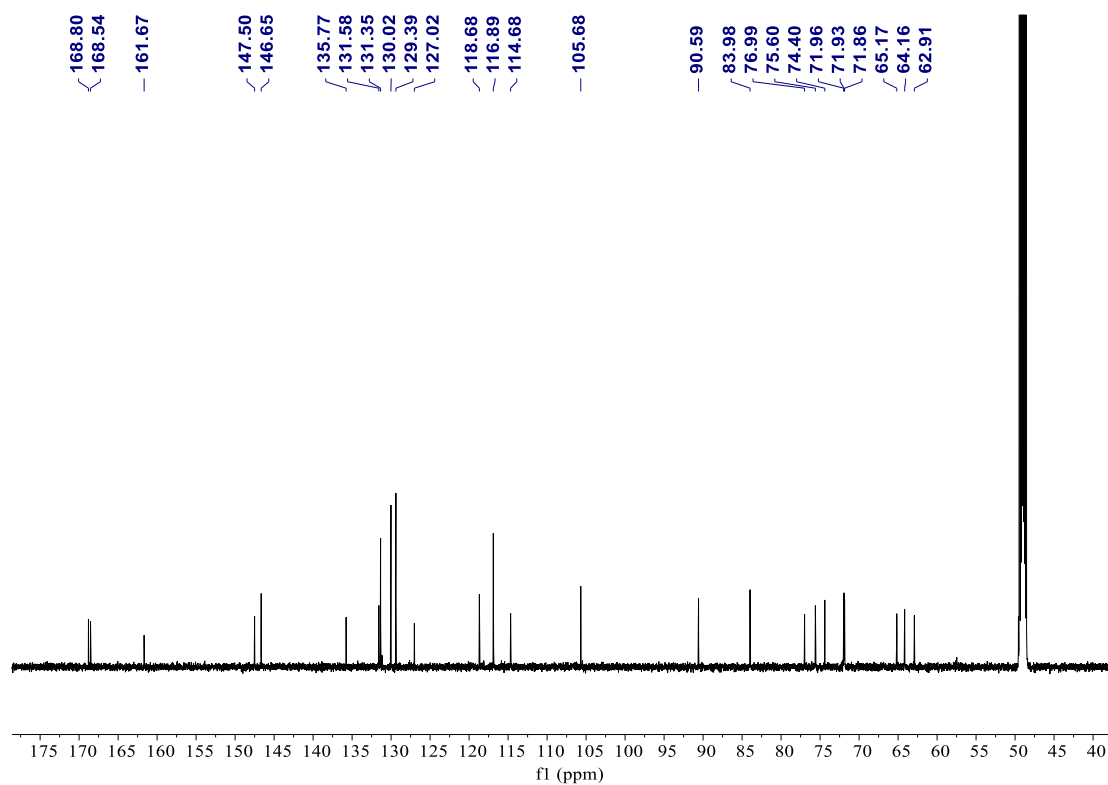

**Figure S15.**  $^{13}\text{C}$  NMR Spectrum of Compound **2** in  $\text{MeOH-}d_4$

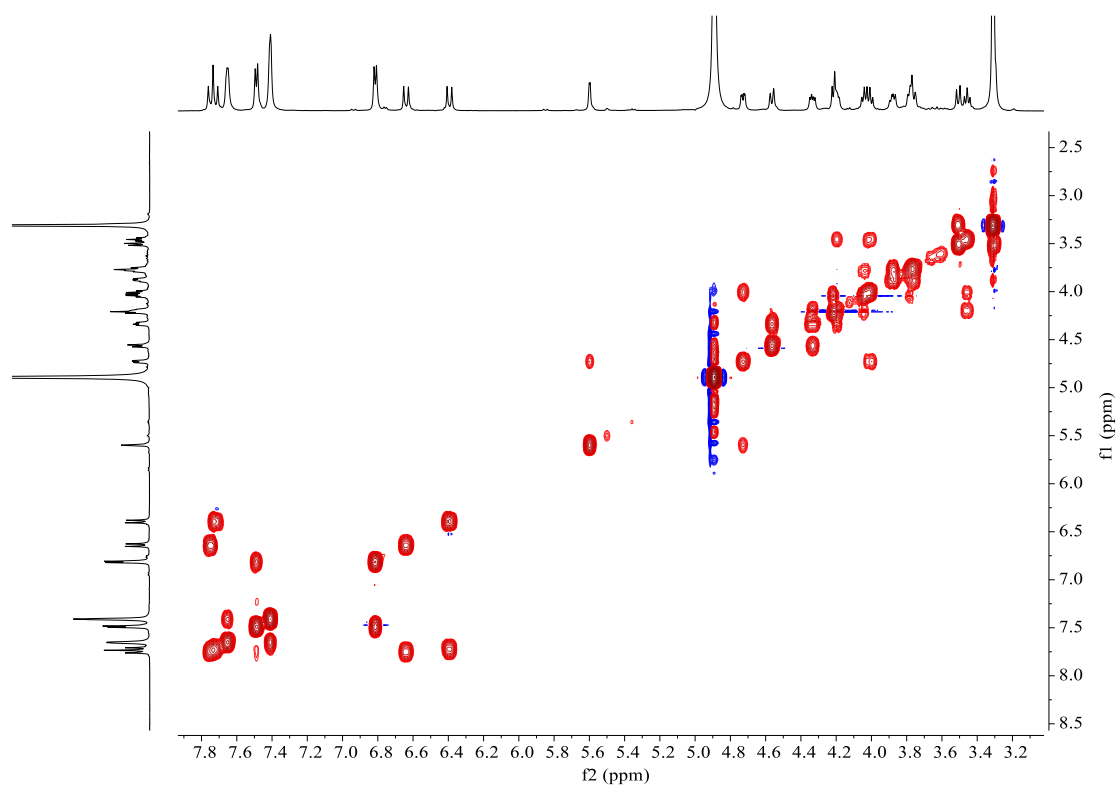

**Figure S16.**  $^1\text{H}$ – $^1\text{H}$  COSY Spectrum of Compound **2** in  $\text{MeOH-}d_4$

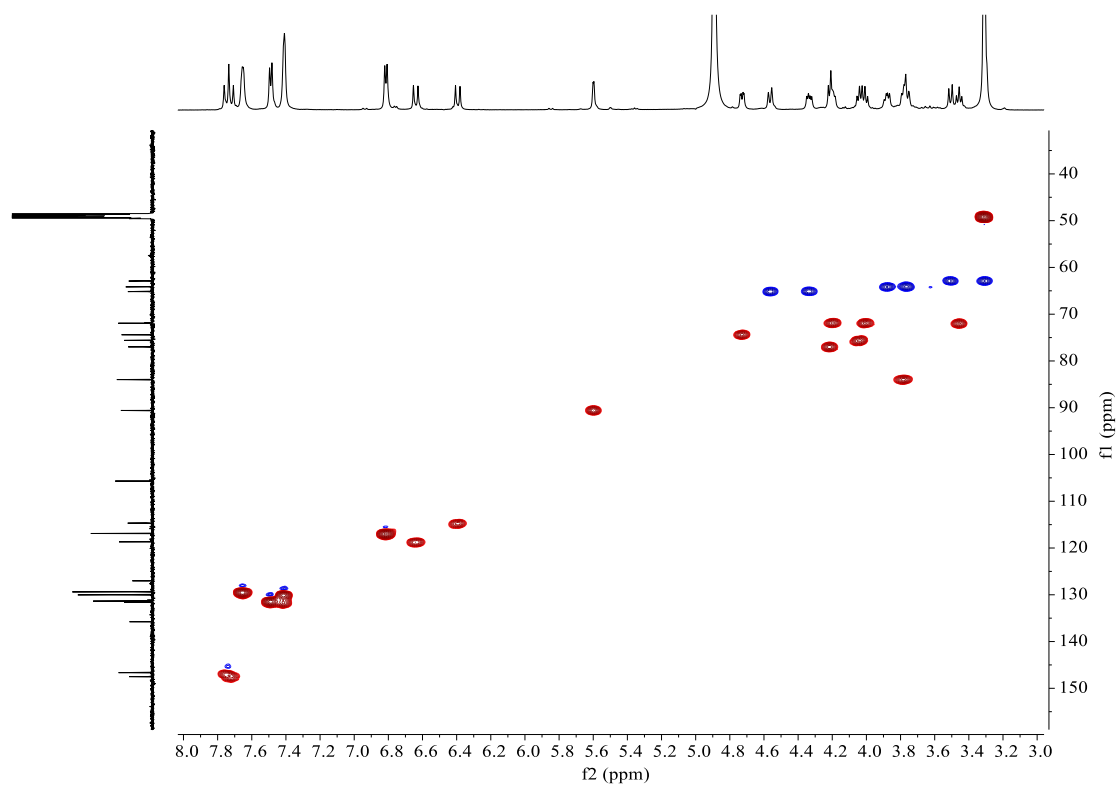

**Figure S17.** HSQC Spectrum of Compound **2** in MeOH- $d_4$

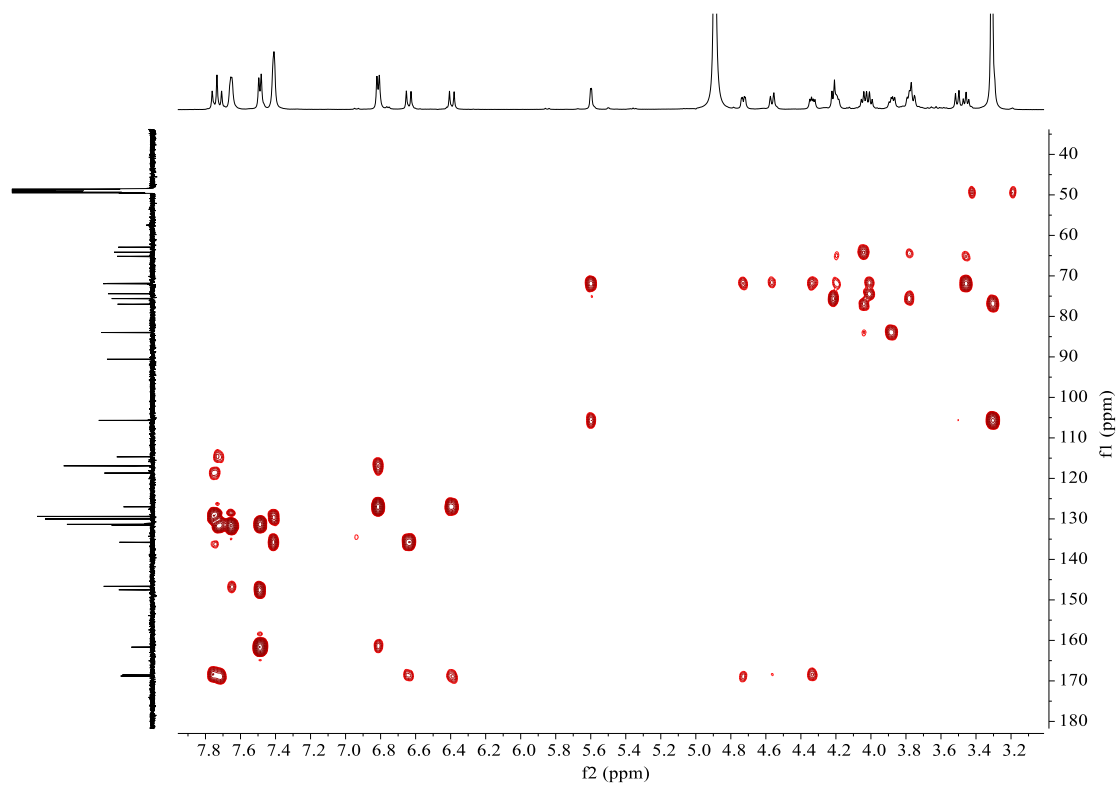

**Figure S18.** HMBC Spectrum of Compound **2** in MeOH- $d_4$



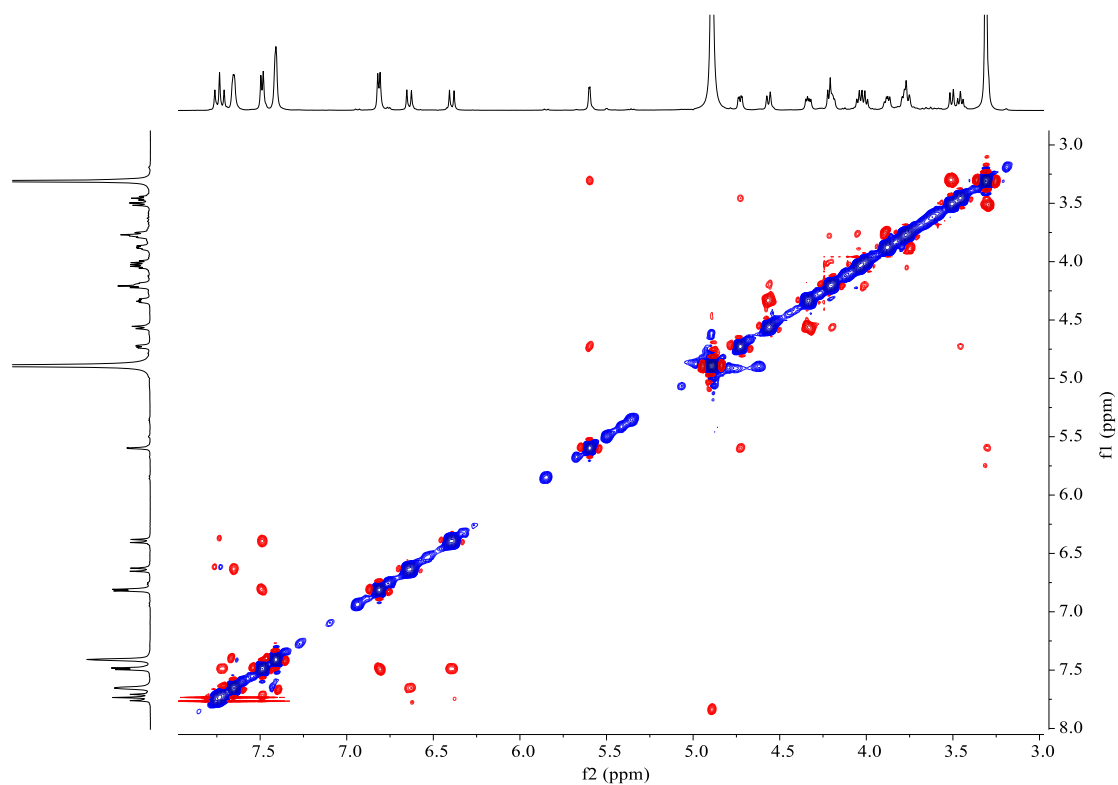

**Figure S19.** NOESY Spectrum of Compound **2** in MeOH- $d_4$

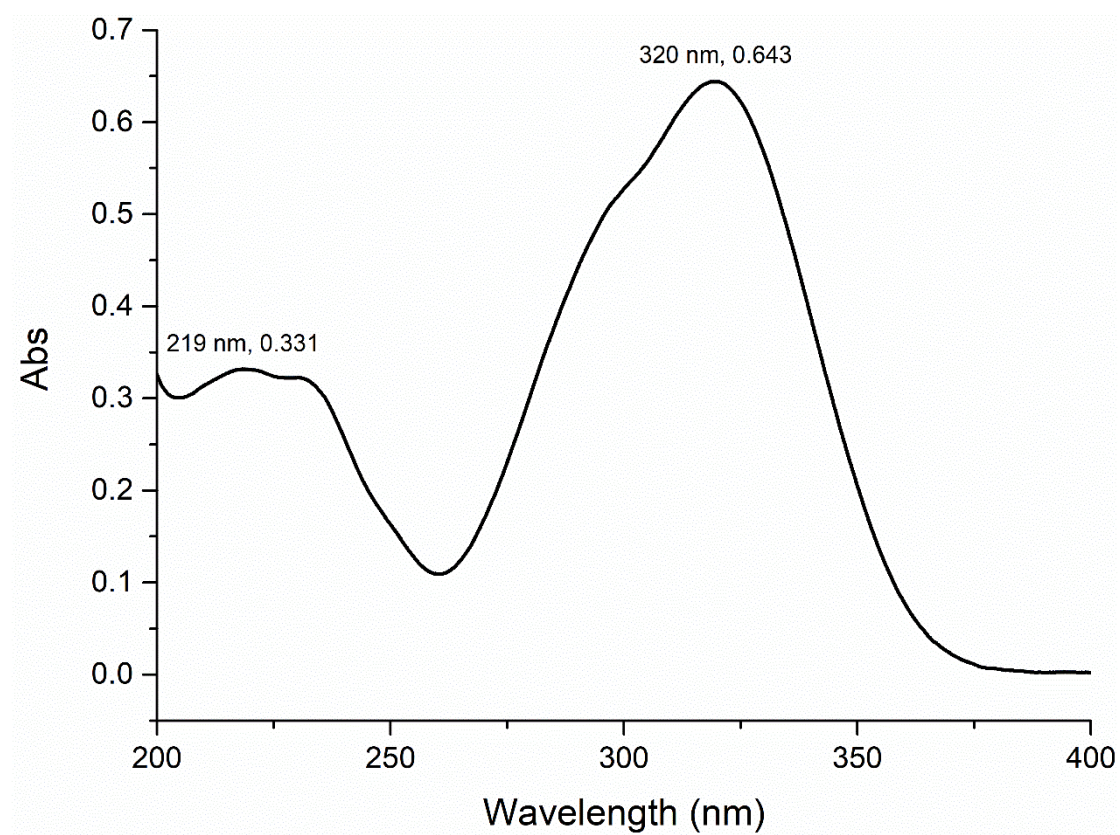

**Figure S20.** UV Spectrum of Compound **3**

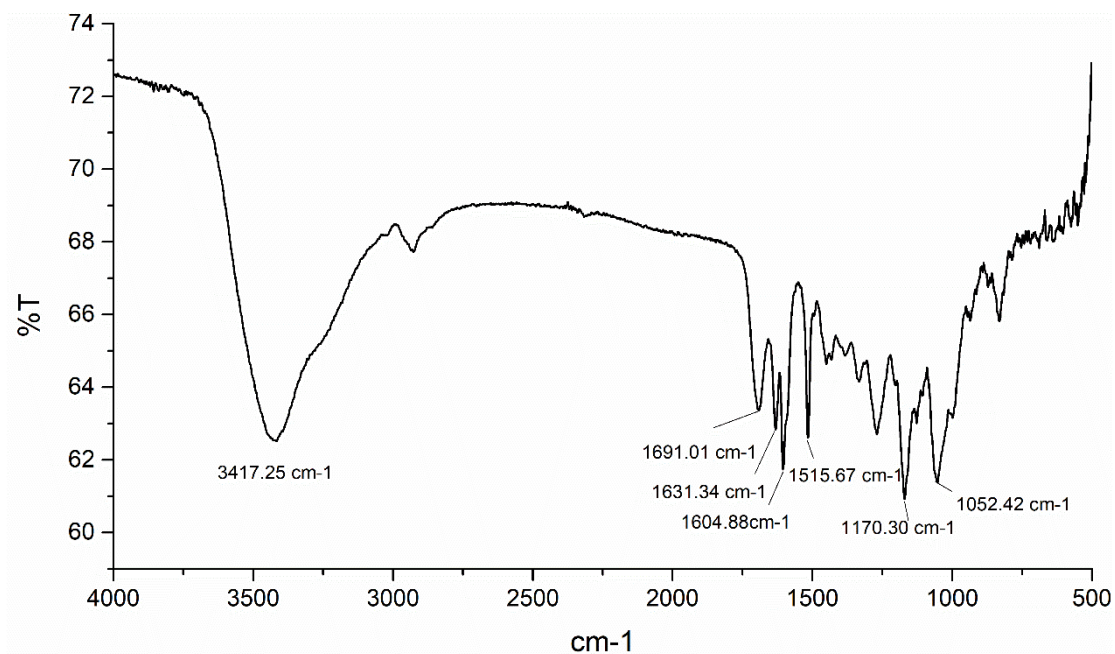

**Figure S21.** IR (KBr disc) Spectrum of Compound **3**

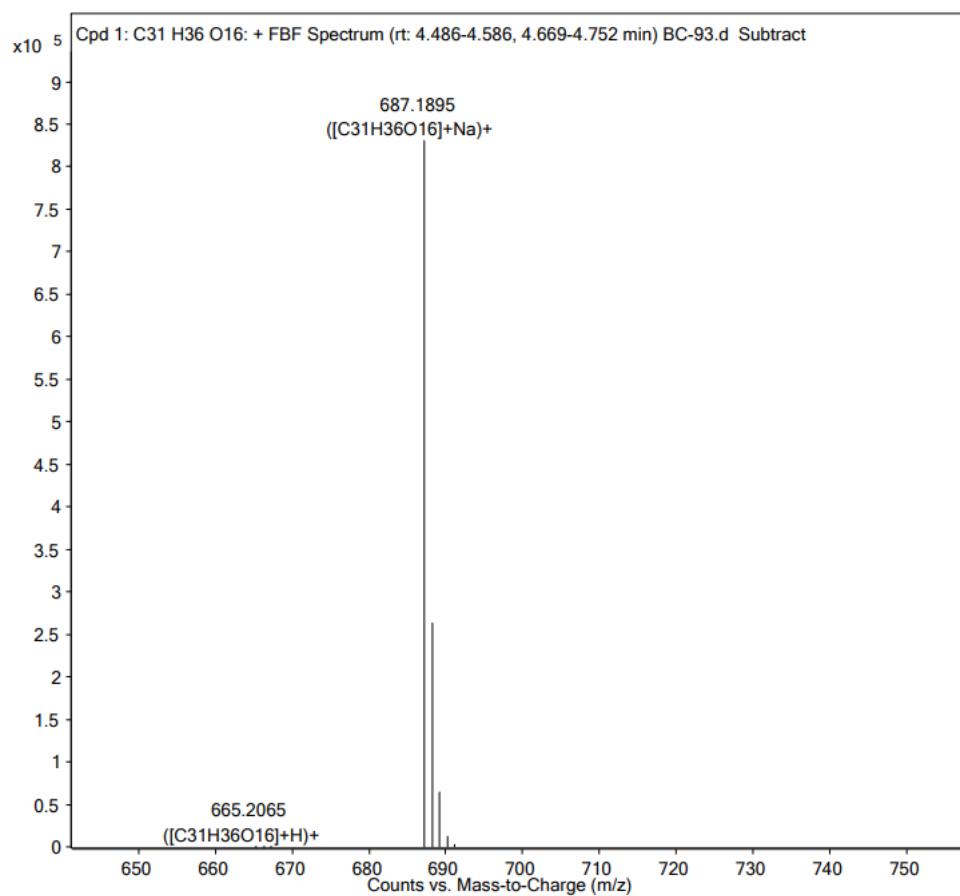

**Figure S22.** (+) HRESIMS Spectrum of Compound **3**

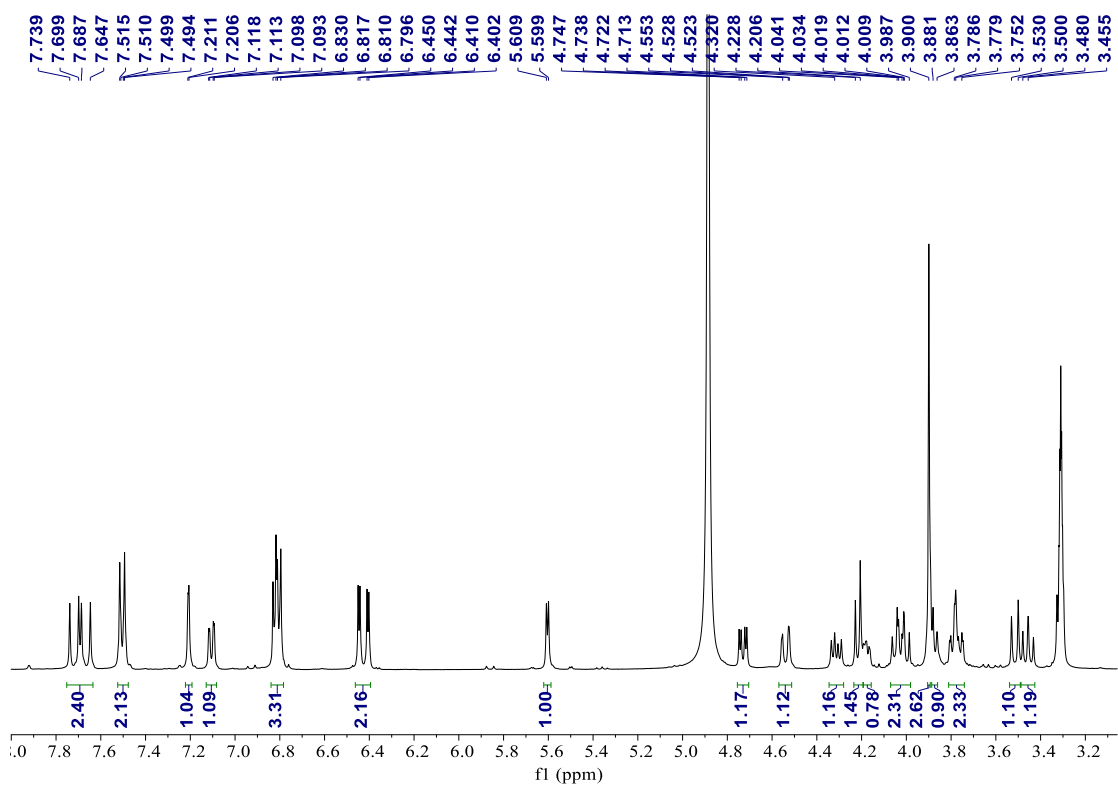

**Figure S23.** <sup>1</sup>H NMR Spectrum of Compound **3** in MeOH-*d*<sub>4</sub>

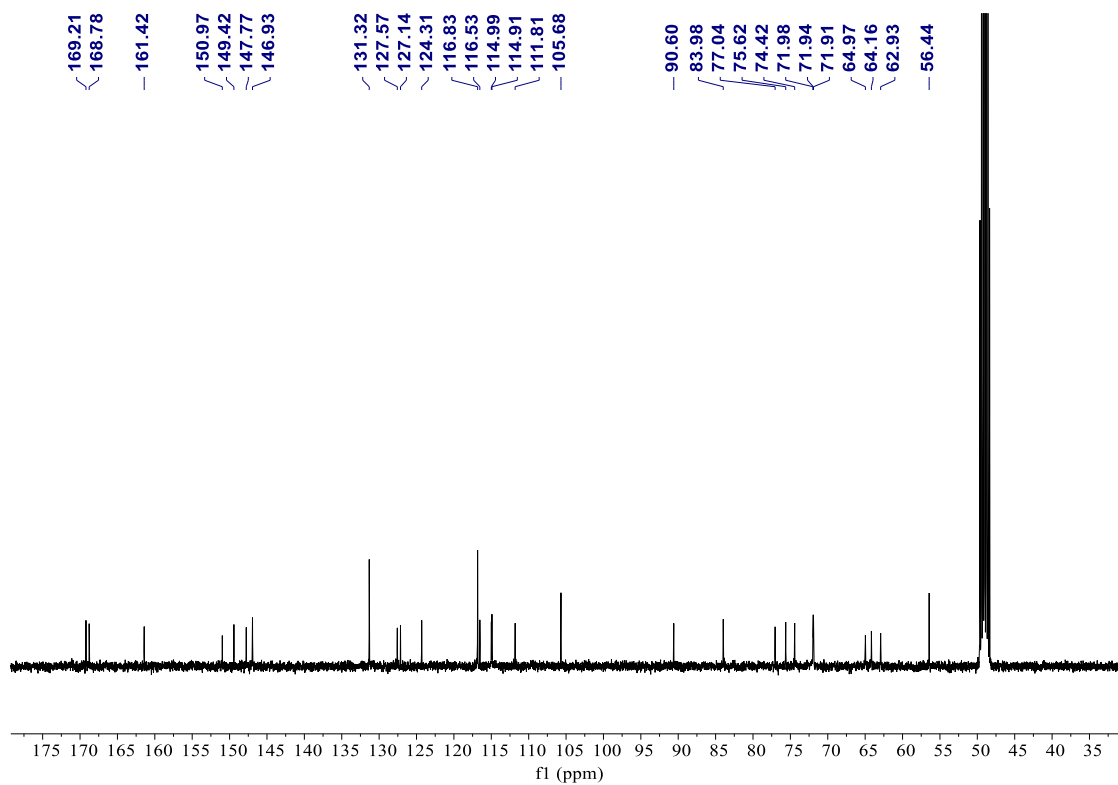

**Figure S24.** <sup>13</sup>C NMR Spectrum of Compound **3** in MeOH-*d*<sub>4</sub>

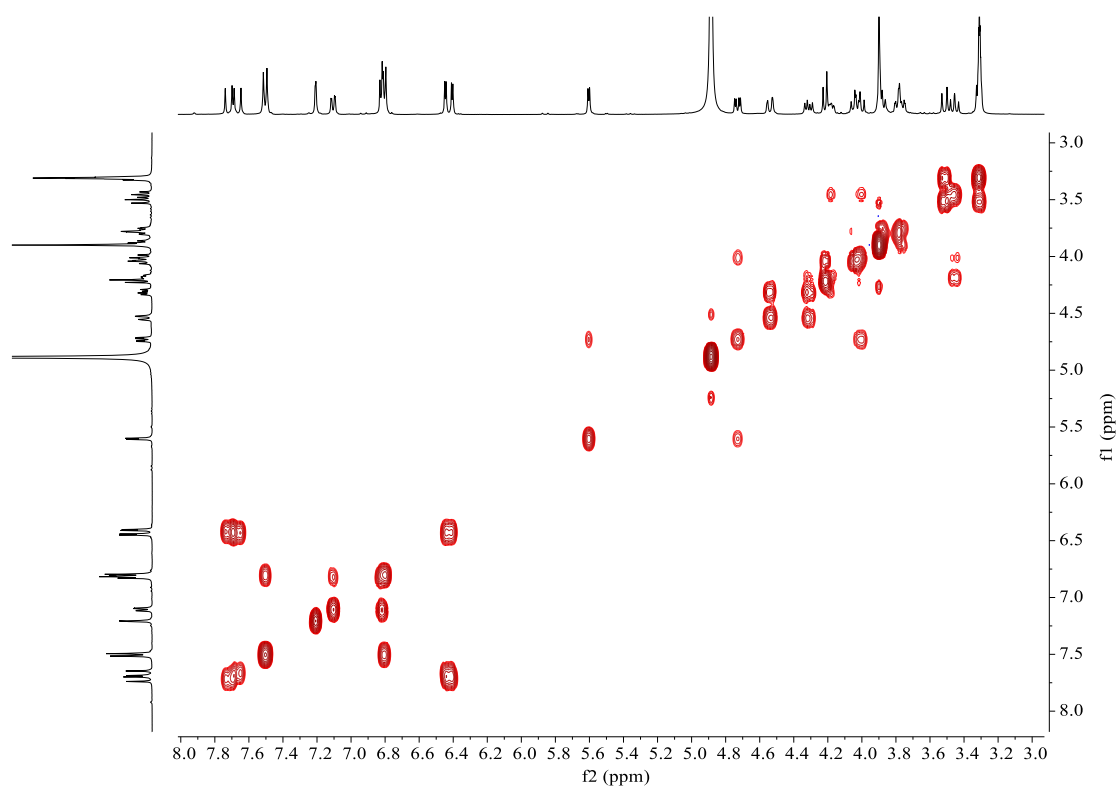

**Figure S25.**  $^1\text{H}$ - $^1\text{H}$  COSY Spectrum of Compound **3** in  $\text{MeOH-}d_4$

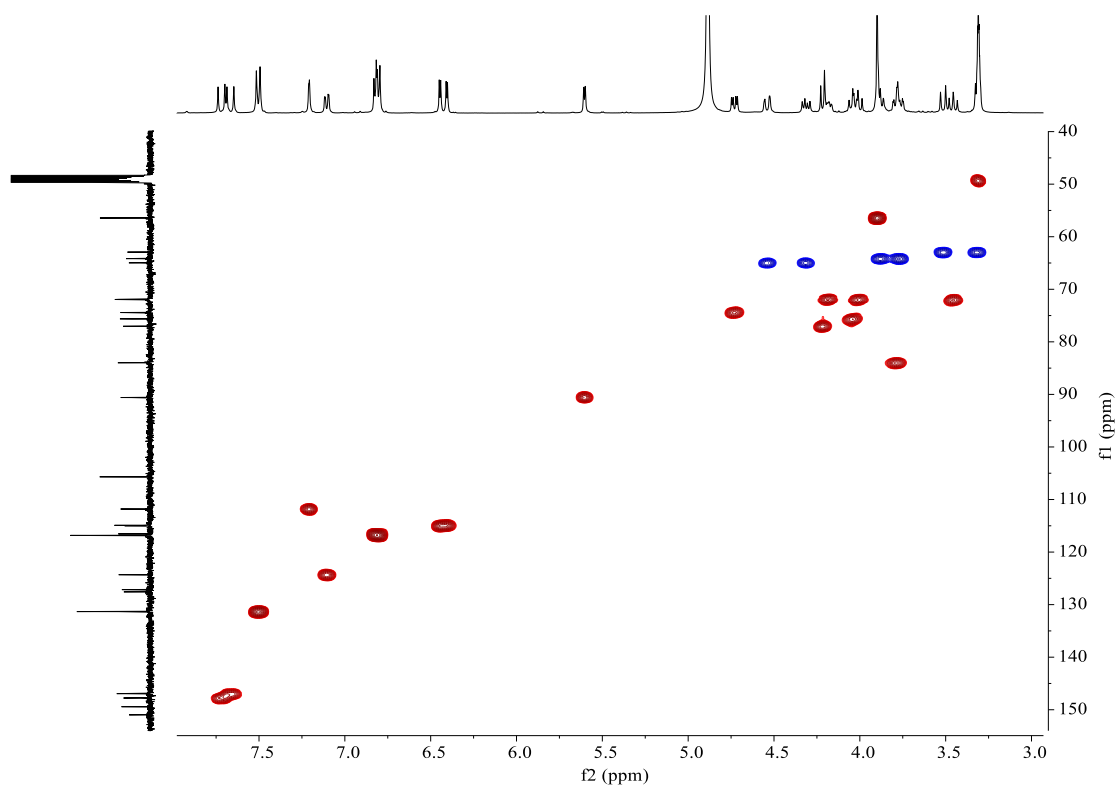

**Figure S26.** HSQC Spectrum of Compound **3** in  $\text{MeOH-}d_4$

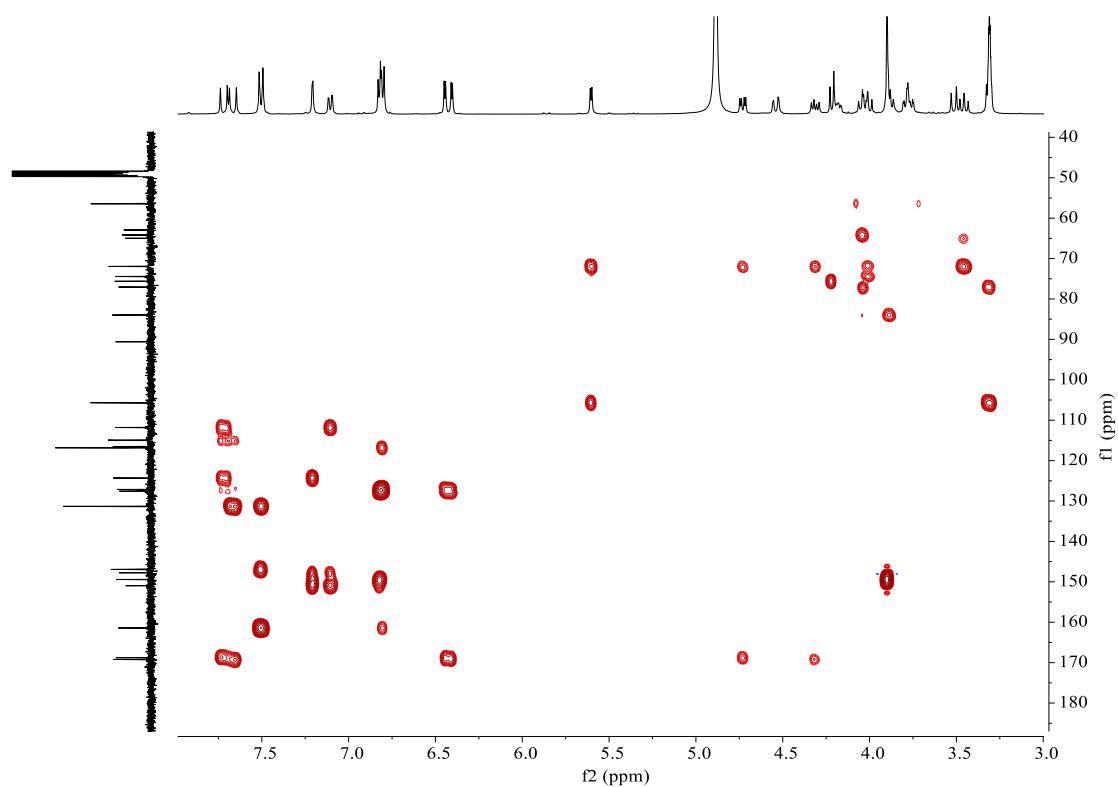

**Figure S27.** HMBC Spectrum of Compound **3** in MeOH- $d_4$

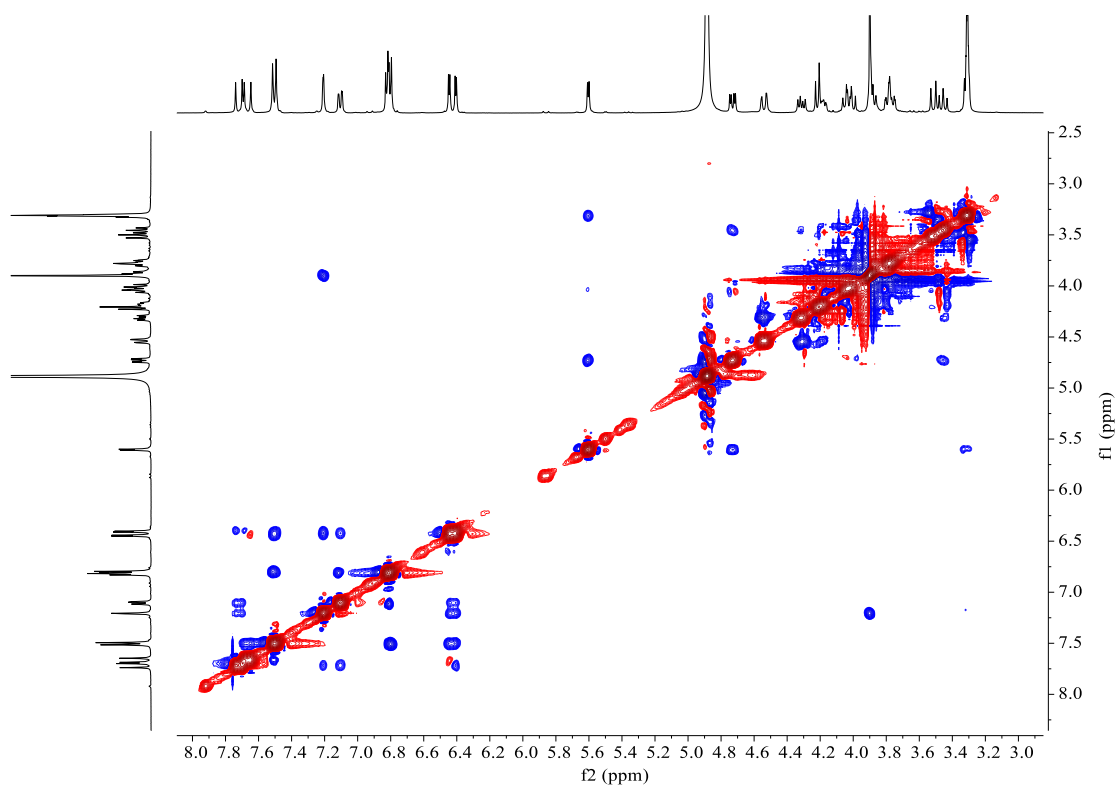

**Figure S28.** NOESY Spectrum of Compound **3** in MeOH- $d_4$

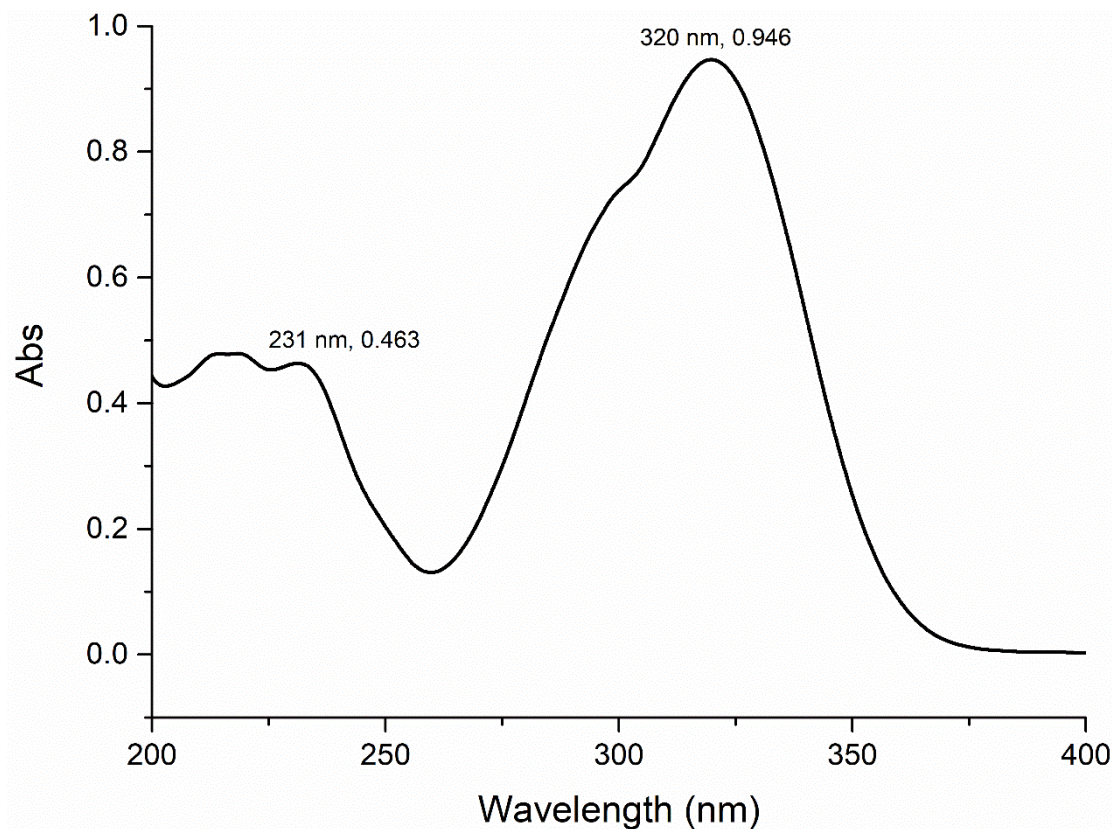

**Figure S29.** UV Spectrum of Compound **4**

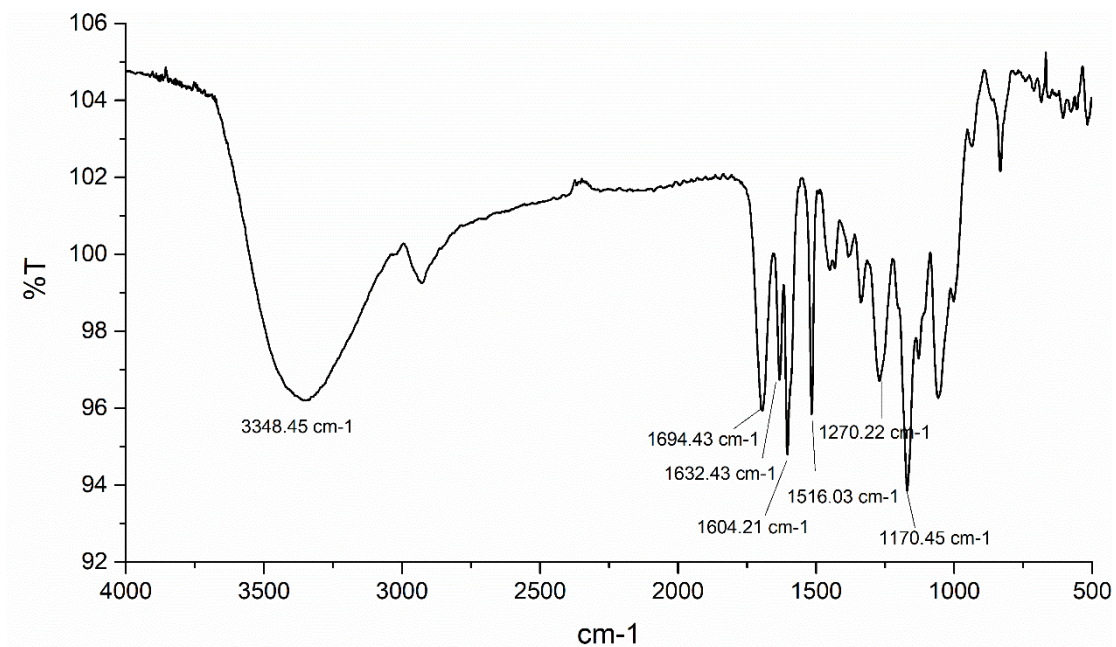

**Figure S30.** IR (KBr disc) Spectrum of Compound **4**

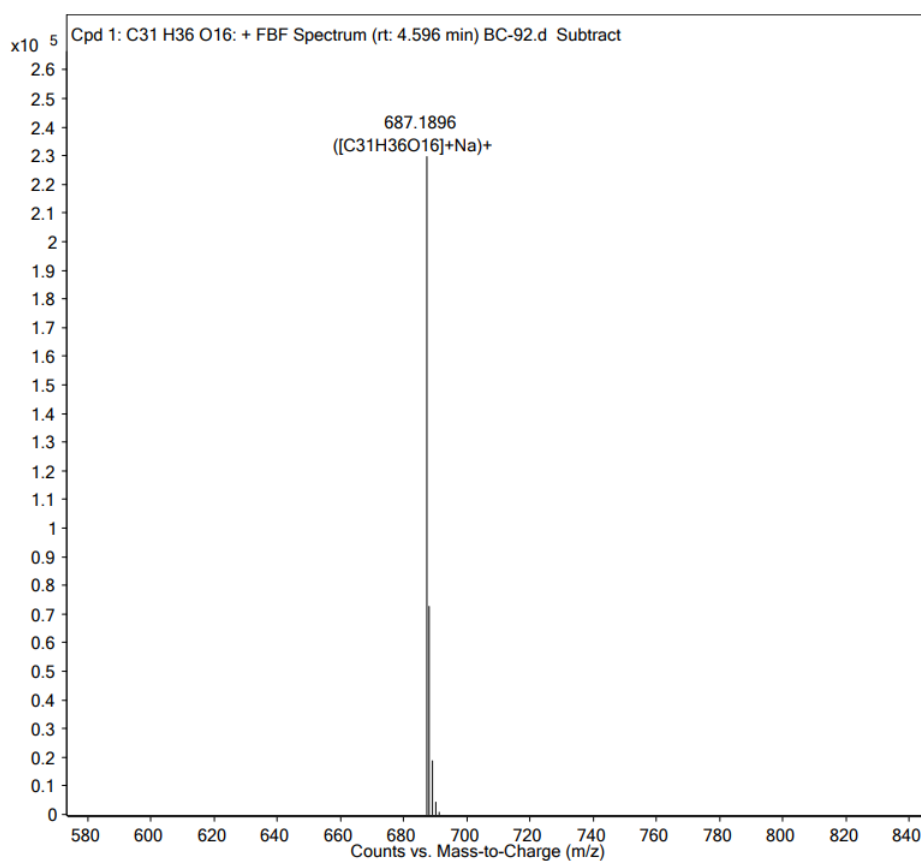

**Figure S31. (+) HRESIMS Spectrum of Compound 4**

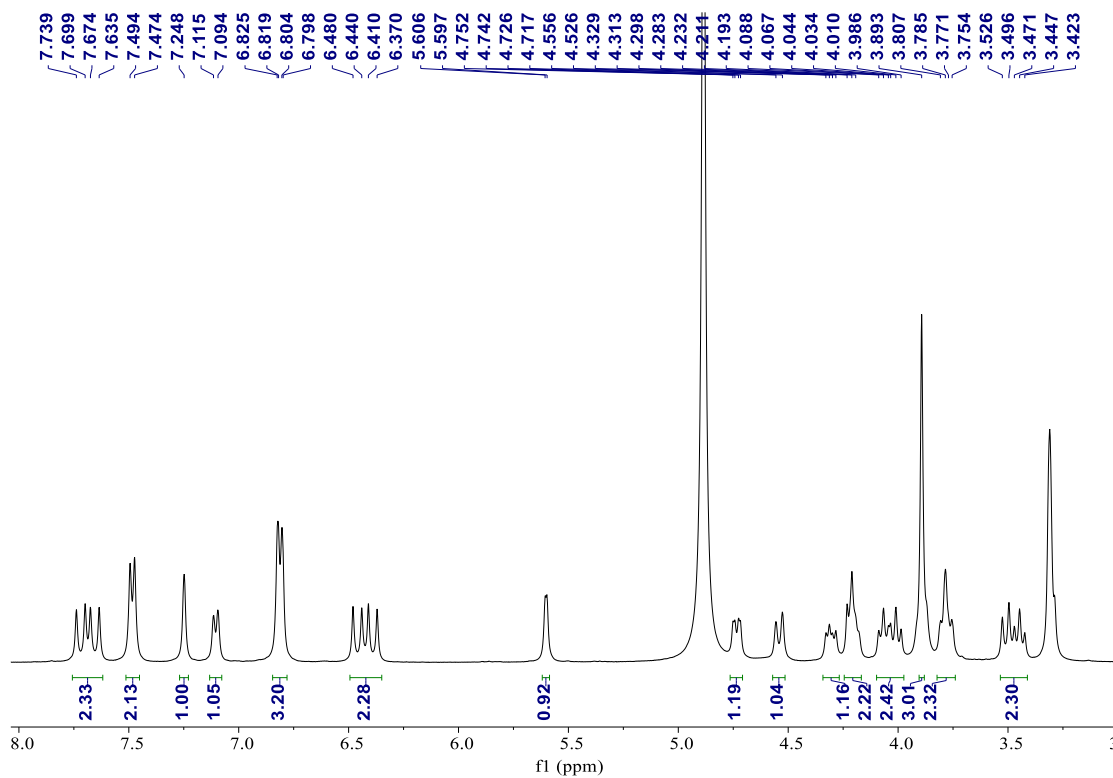

**Figure S32. <sup>1</sup>H NMR Spectrum of Compound 4 in MeOH-*d*<sub>4</sub>**

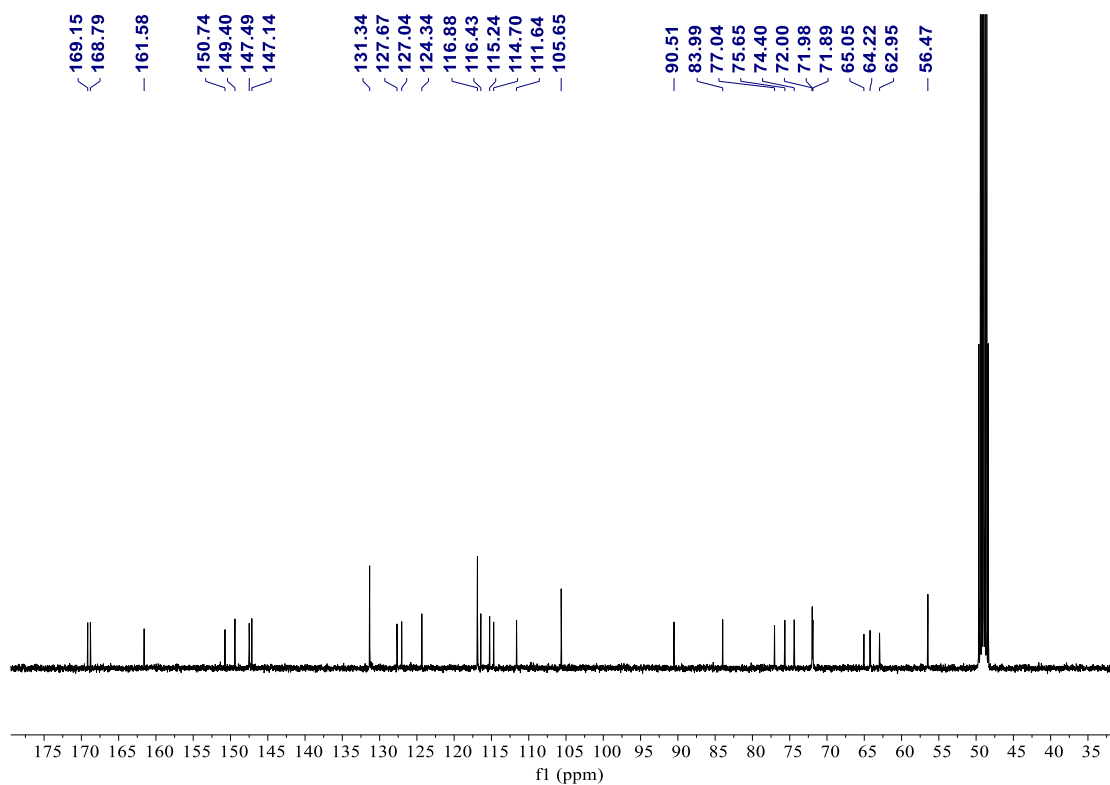

**Figure S33.**  $^{13}\text{C}$  NMR Spectrum of Compound **4** in  $\text{MeOH-}d_4$

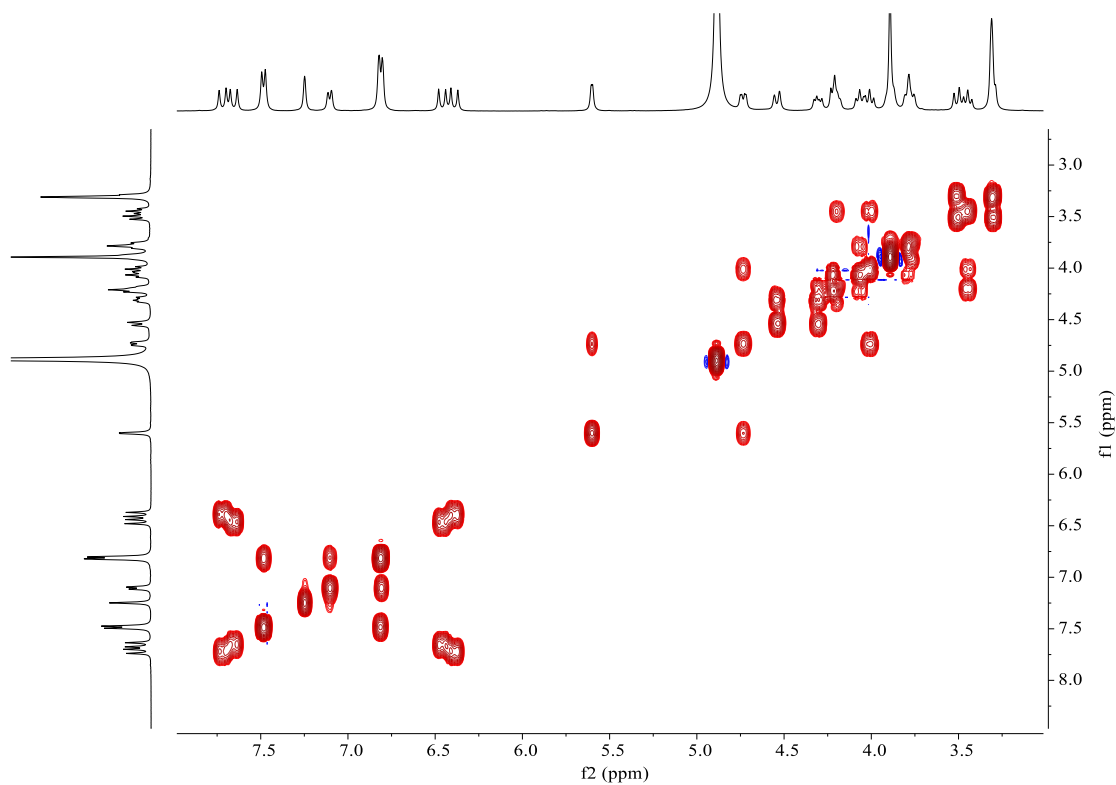

**Figure S34.**  $^1\text{H}$ - $^1\text{H}$  COSY Spectrum of Compound **4** in  $\text{MeOH-}d_4$



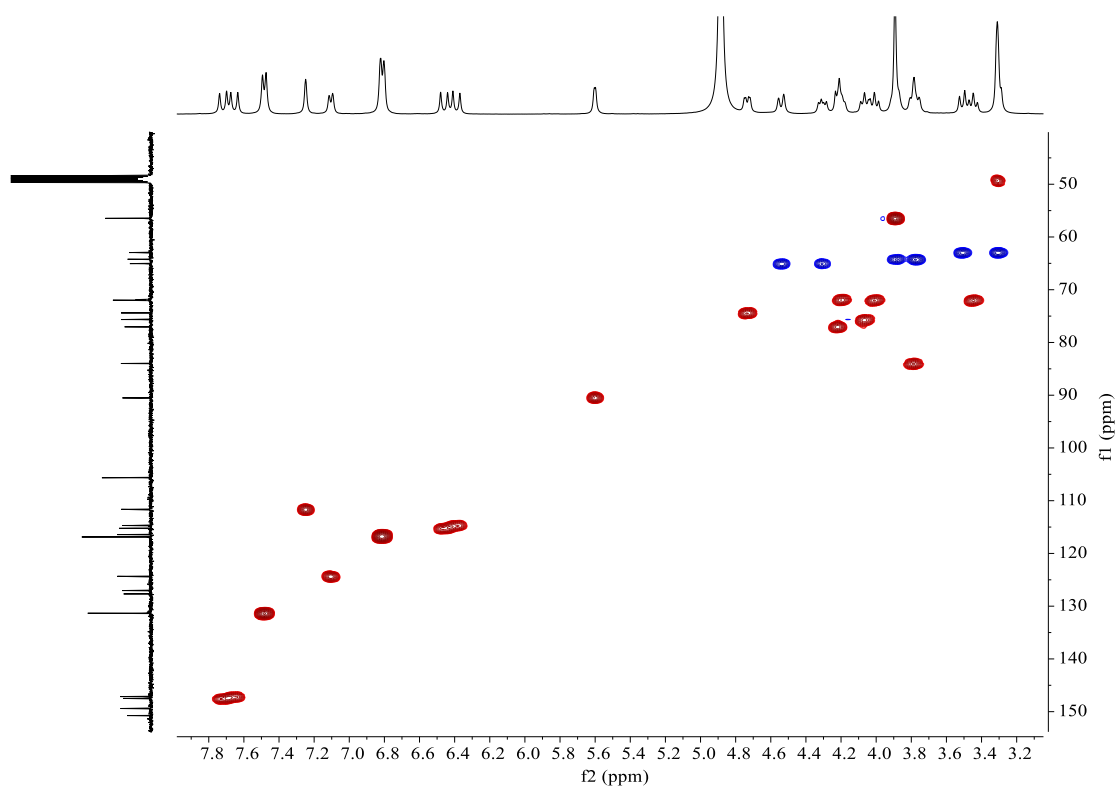

**Figure S35.** HSQC Spectrum of Compound **4** in MeOH- $d_4$

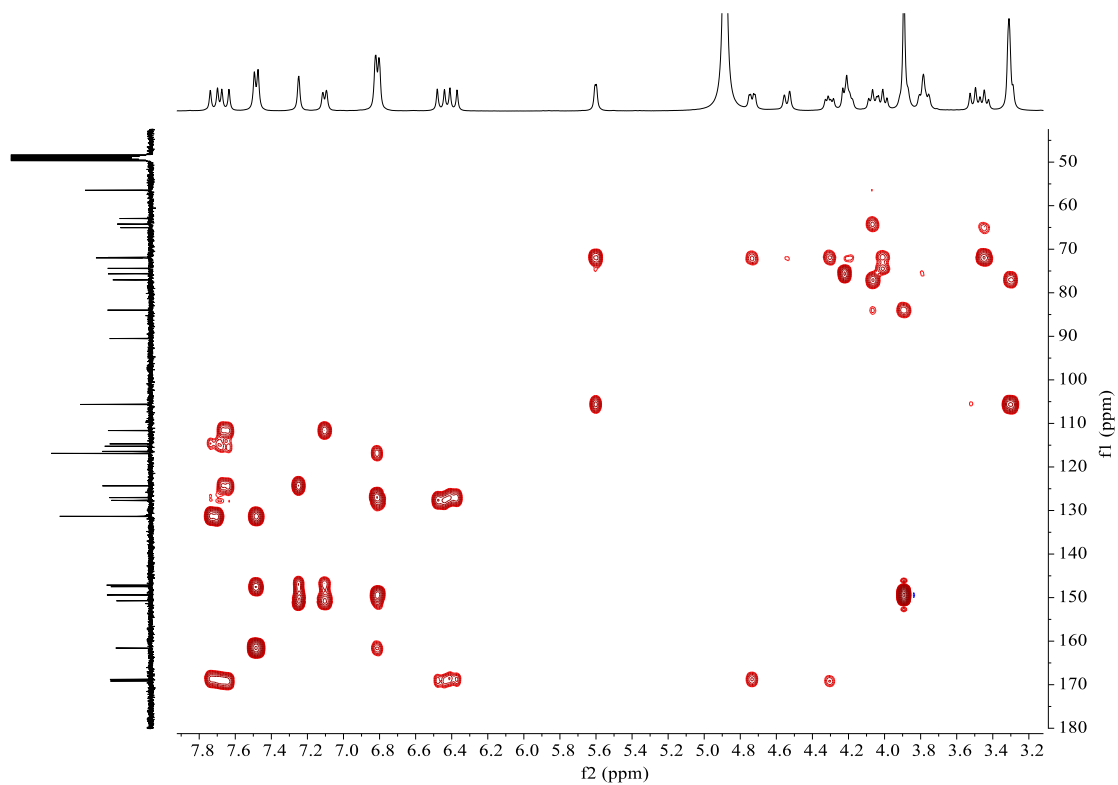

**Figure S36.** HMBC Spectrum of Compound **4** in MeOH- $d_4$

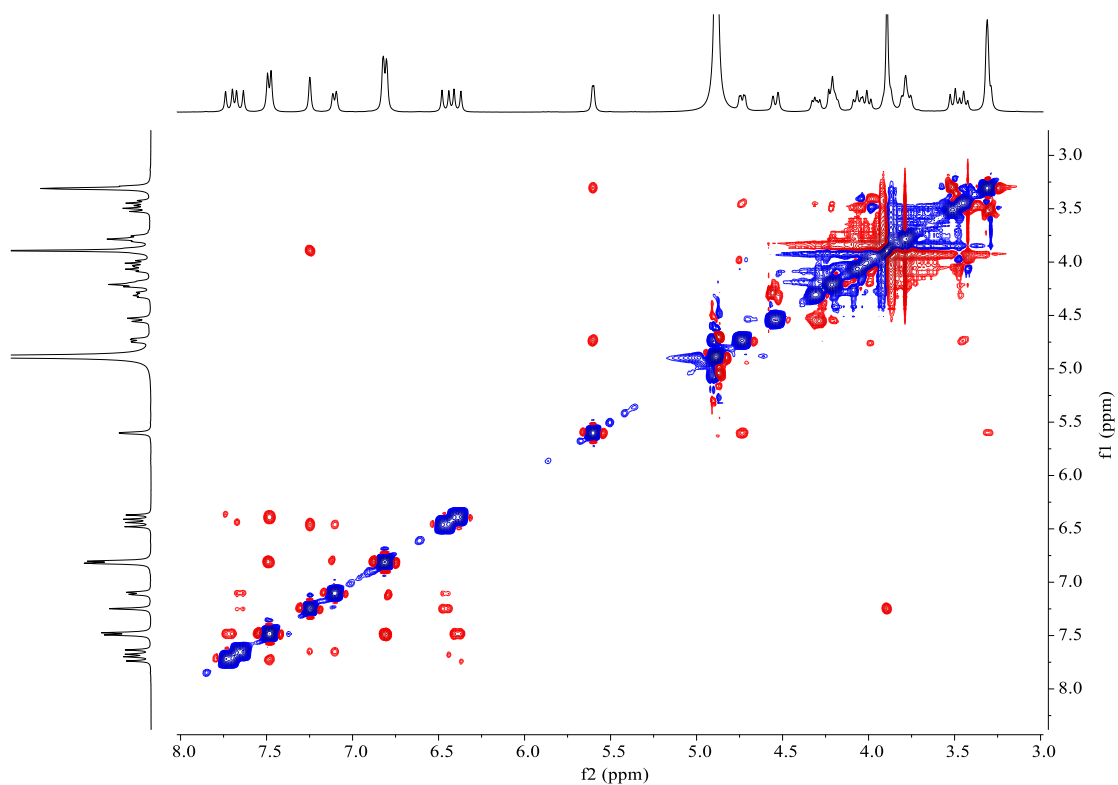

**Figure S37.** NOESY Spectrum of Compound **4** in MeOH-*d*<sub>4</sub>

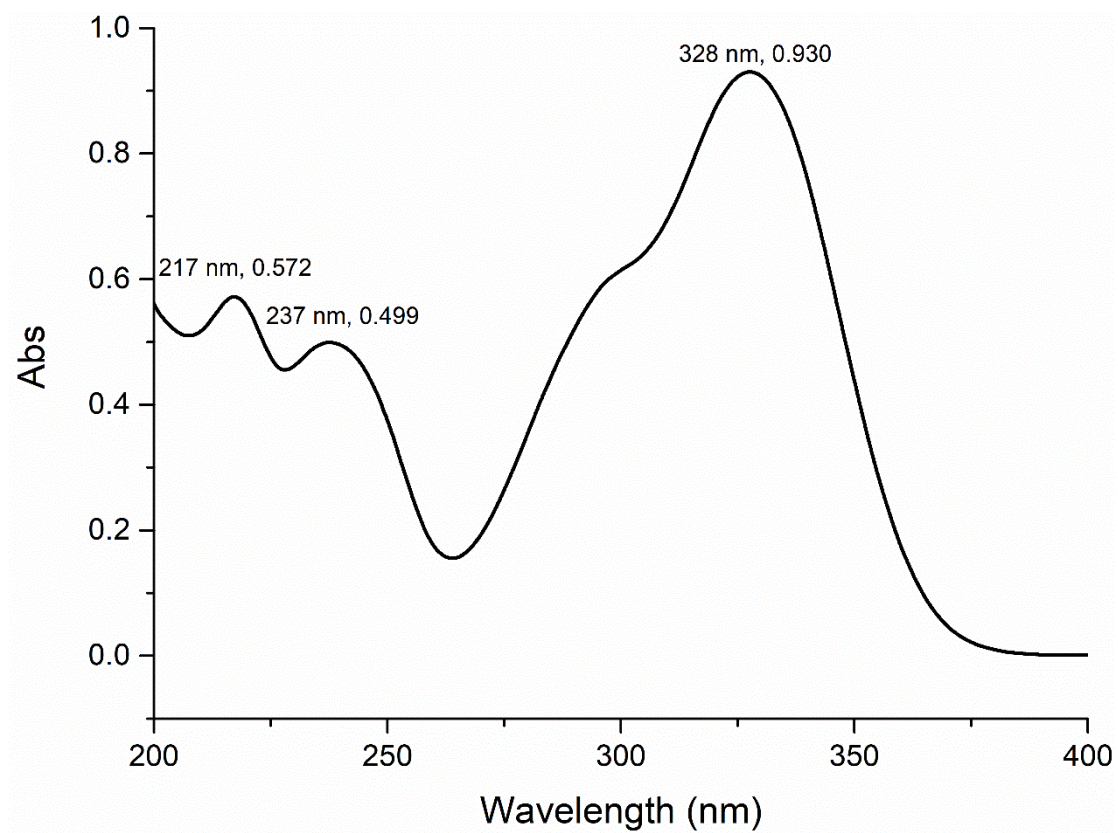

**Figure S38.** UV Spectrum of Compound **5**

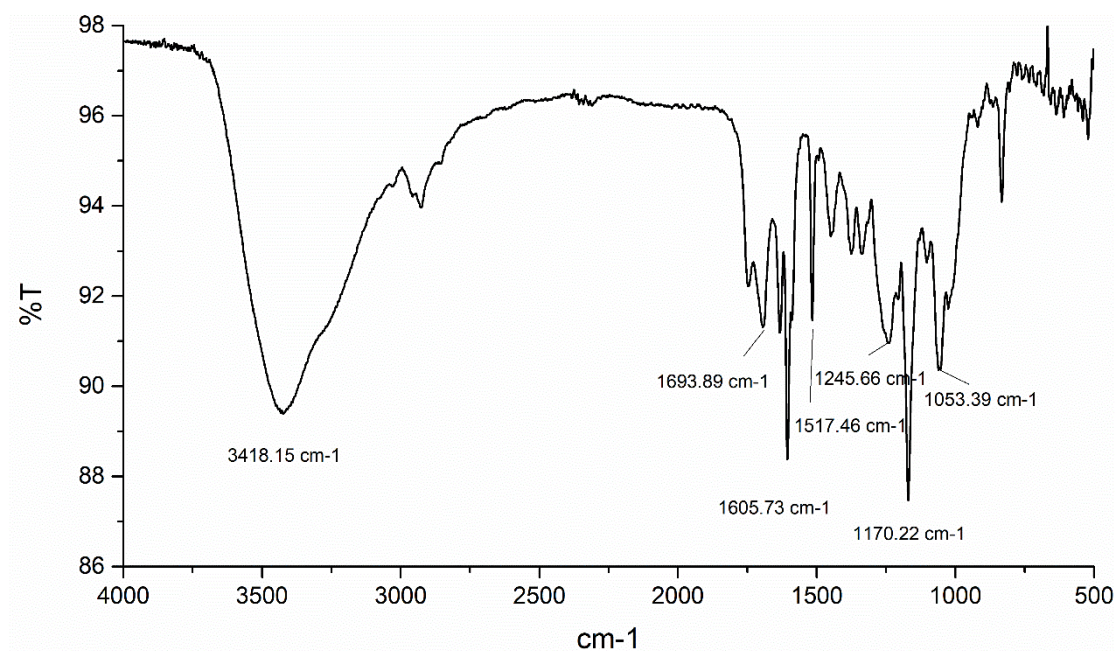

**Figure S39.** IR (KBr disc) Spectrum of Compound **5**

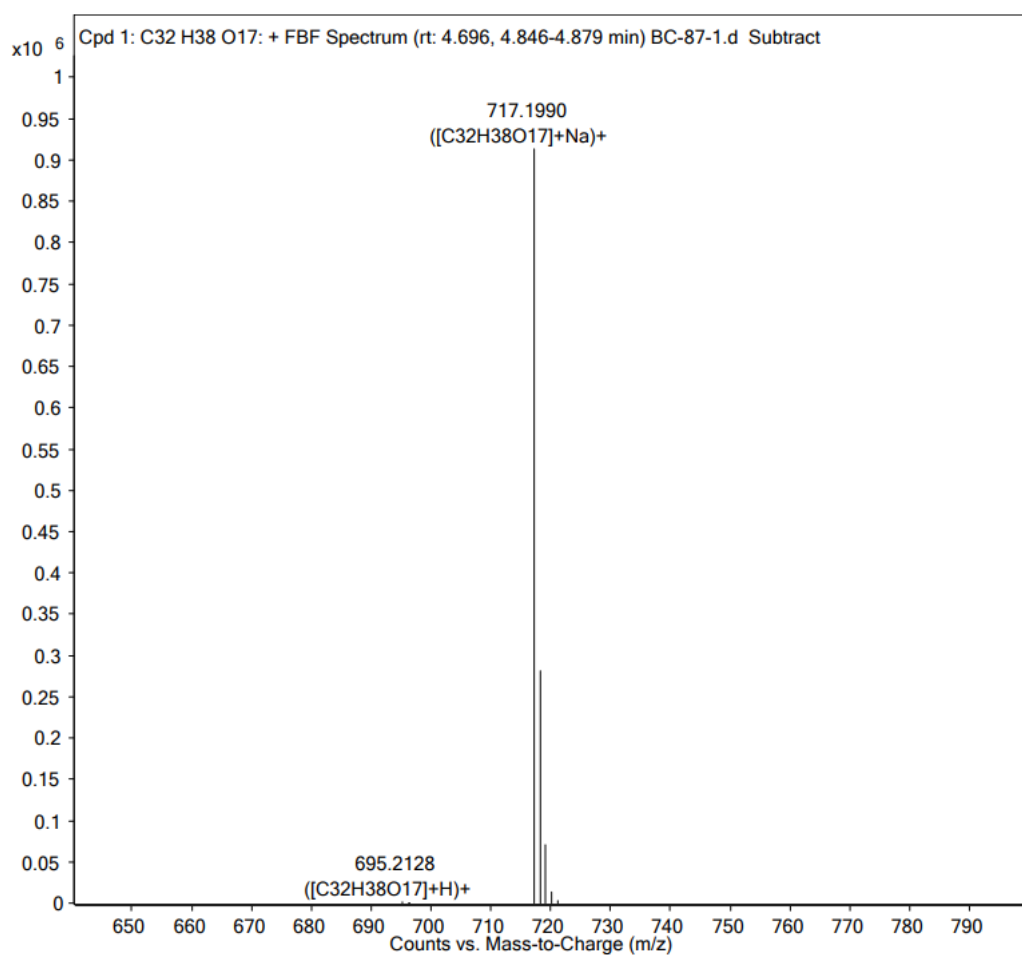

**Figure S40.** (+) HRESIMS Spectrum of Compound **5**

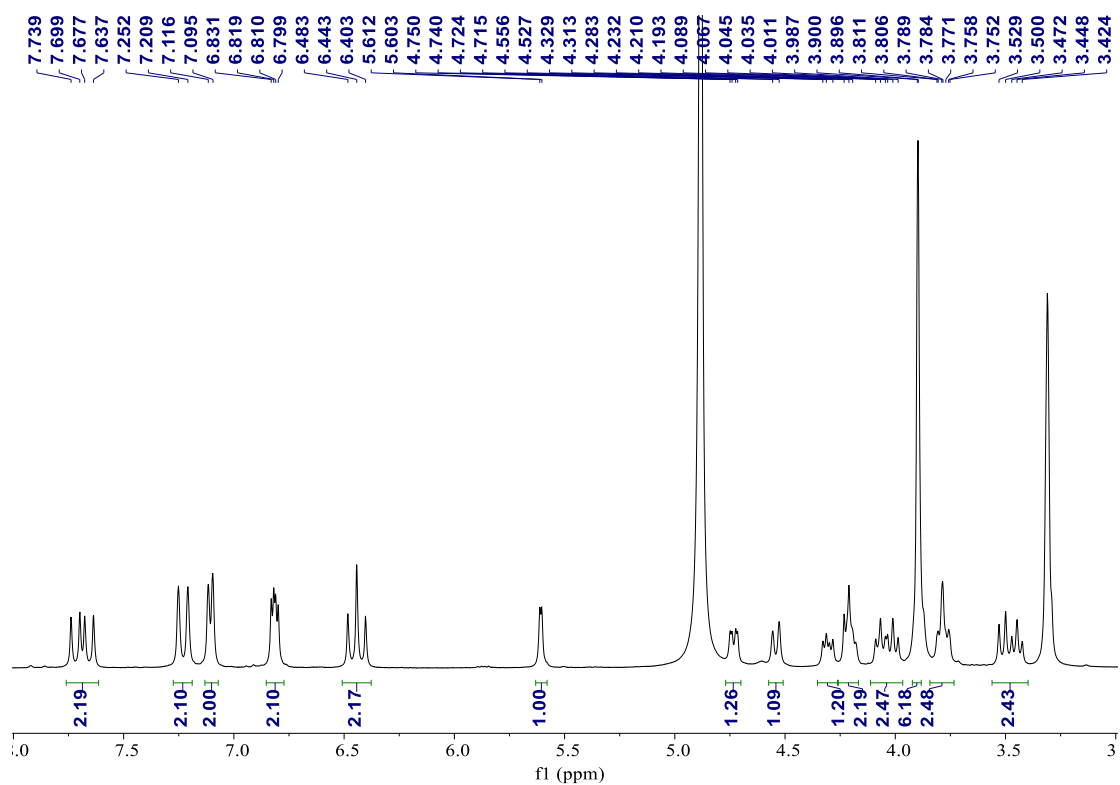

**Figure S41.  $^1\text{H}$  NMR Spectrum of Compound 5 in  $\text{MeOH-}d_4$**

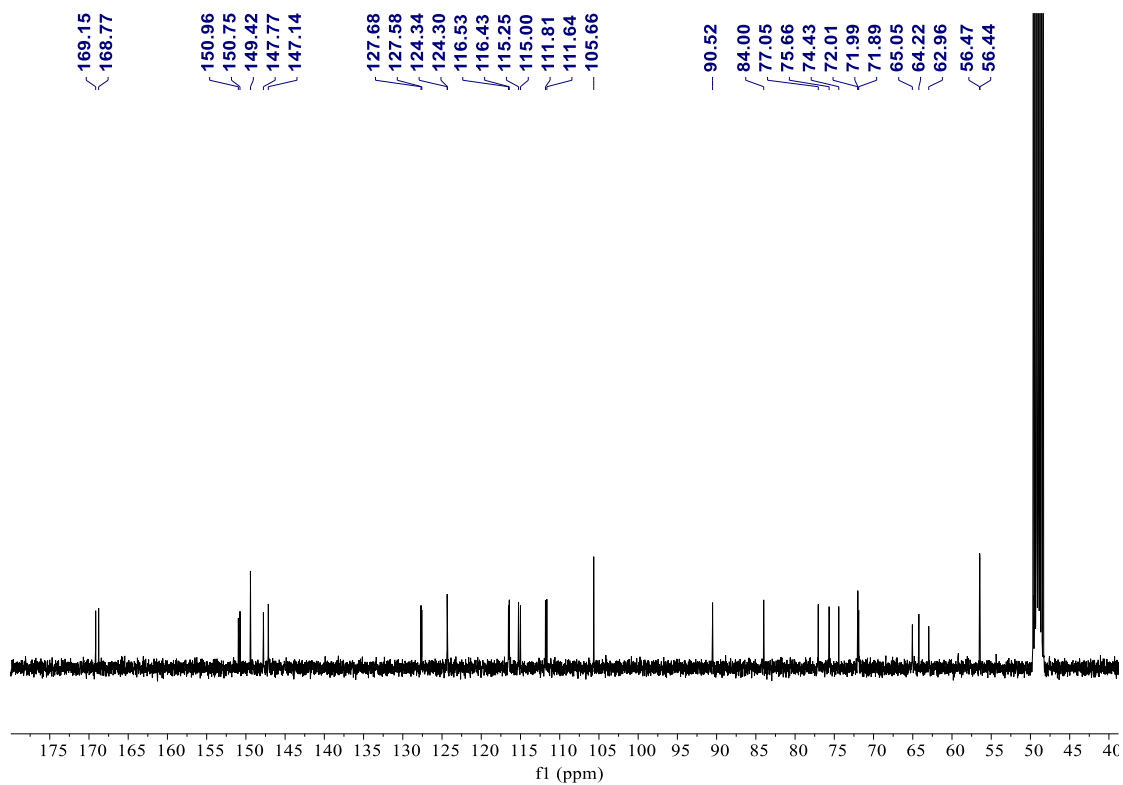

**Figure S42.  $^{13}\text{C}$  NMR Spectrum of Compound 5 in  $\text{MeOH-}d_4$**

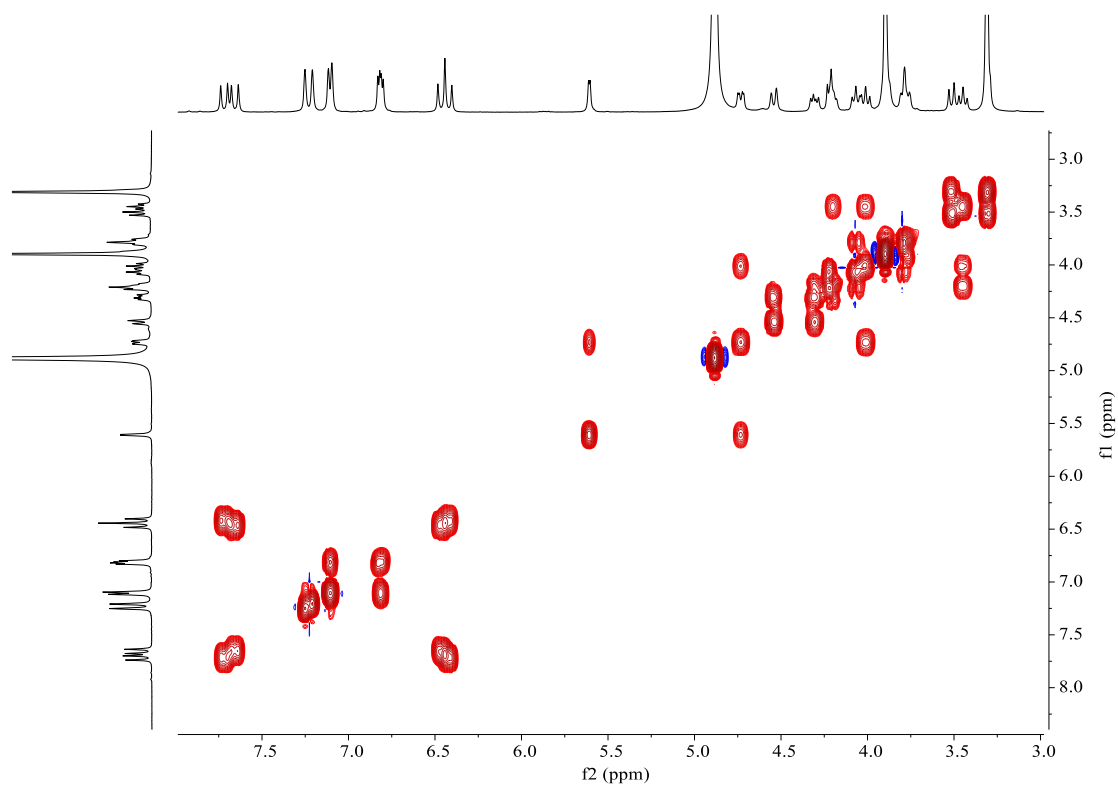

**Figure S43.**  $^1\text{H}$ - $^1\text{H}$  COSY Spectrum of Compound **5** in  $\text{MeOH-}d_4$

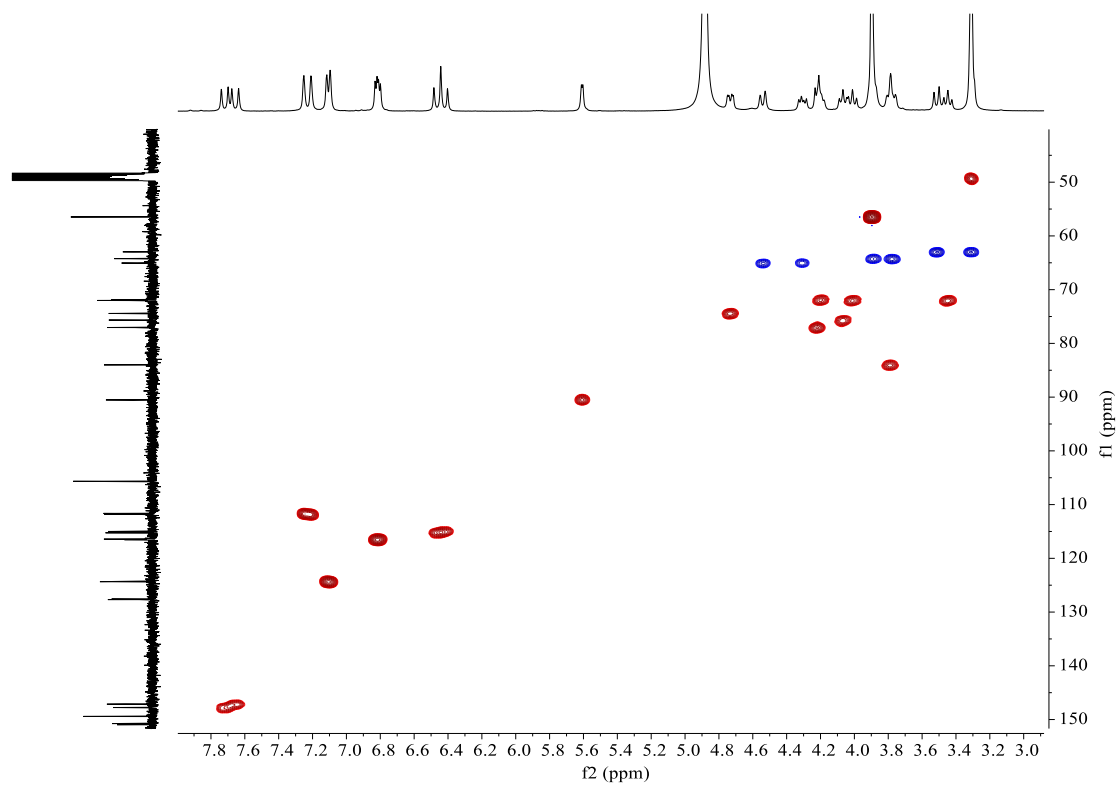

**Figure S44.** HSQC Spectrum of Compound **5** in  $\text{MeOH-}d_4$

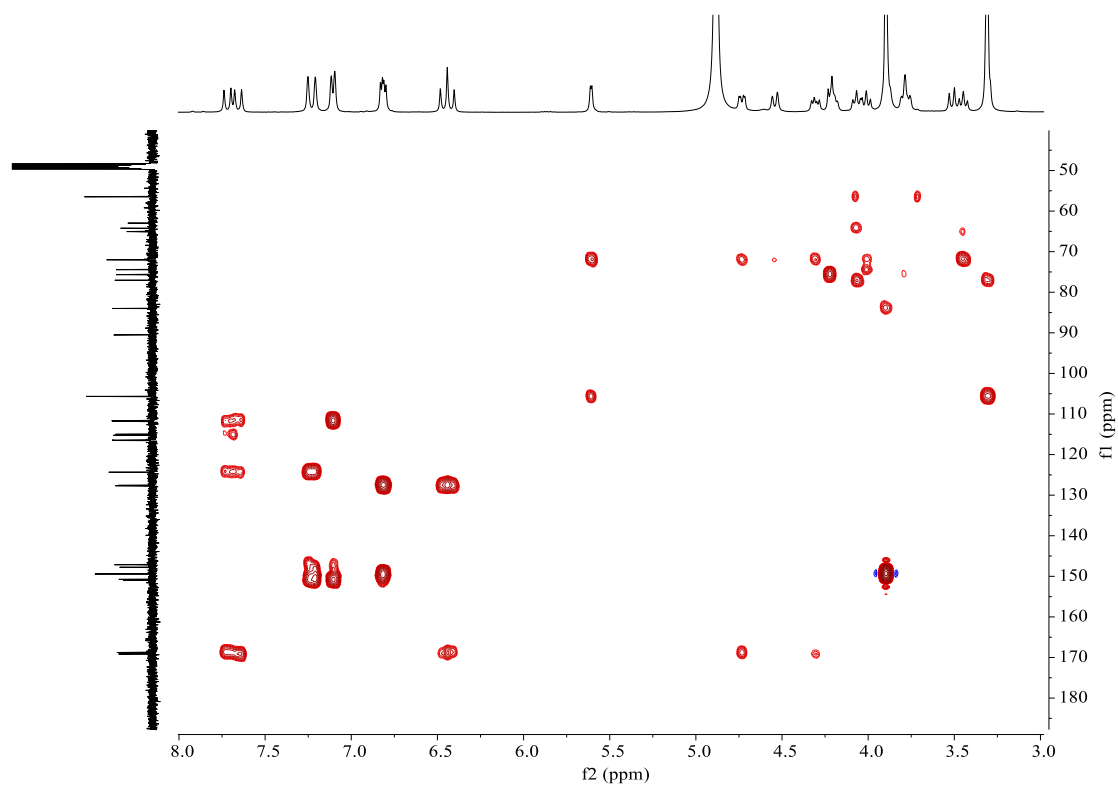

**Figure S45.** HMBC Spectrum of Compound **5** in MeOH- $d_4$

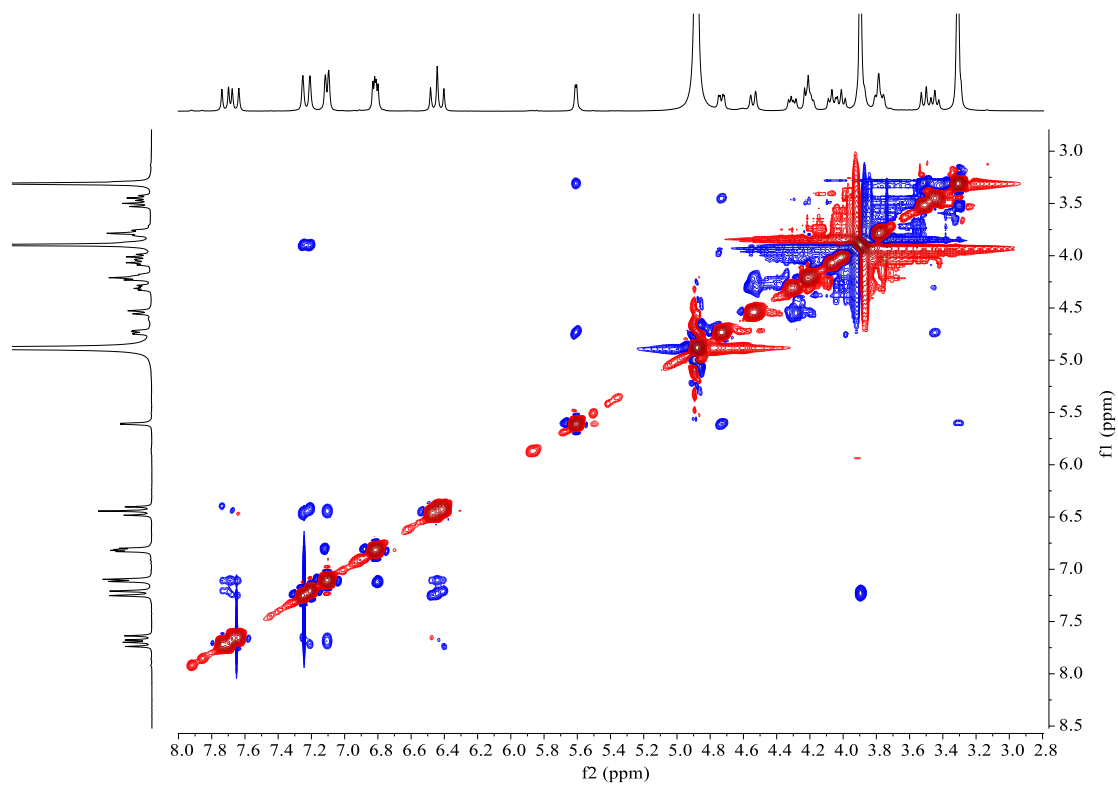

**Figure S46.** NOESY Spectrum of Compound **5** in MeOH- $d_4$



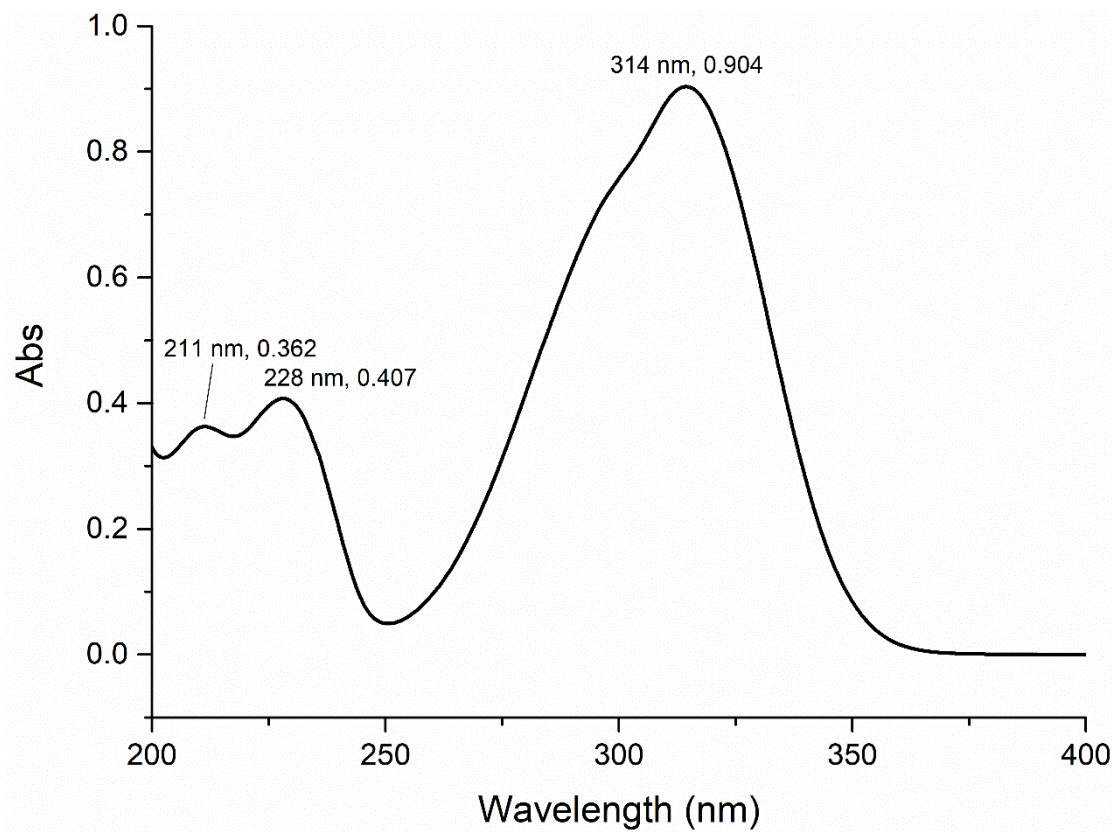

**Figure S47.** UV Spectrum of Compound **6**

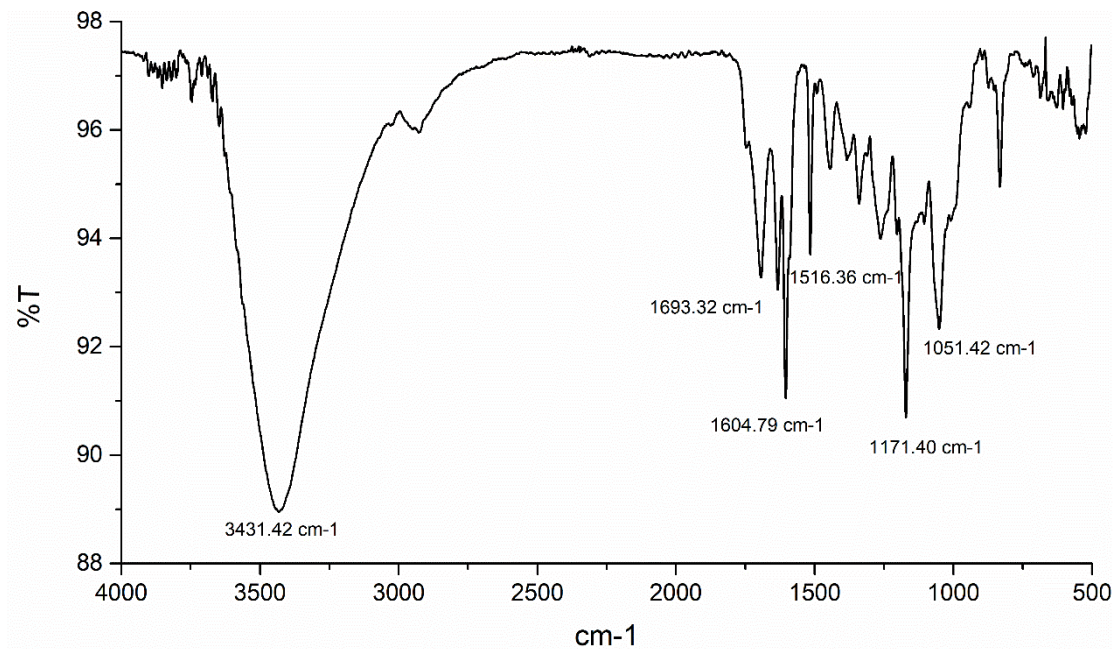

**Figure S48.** IR (KBr disc) Spectrum of Compound **6**

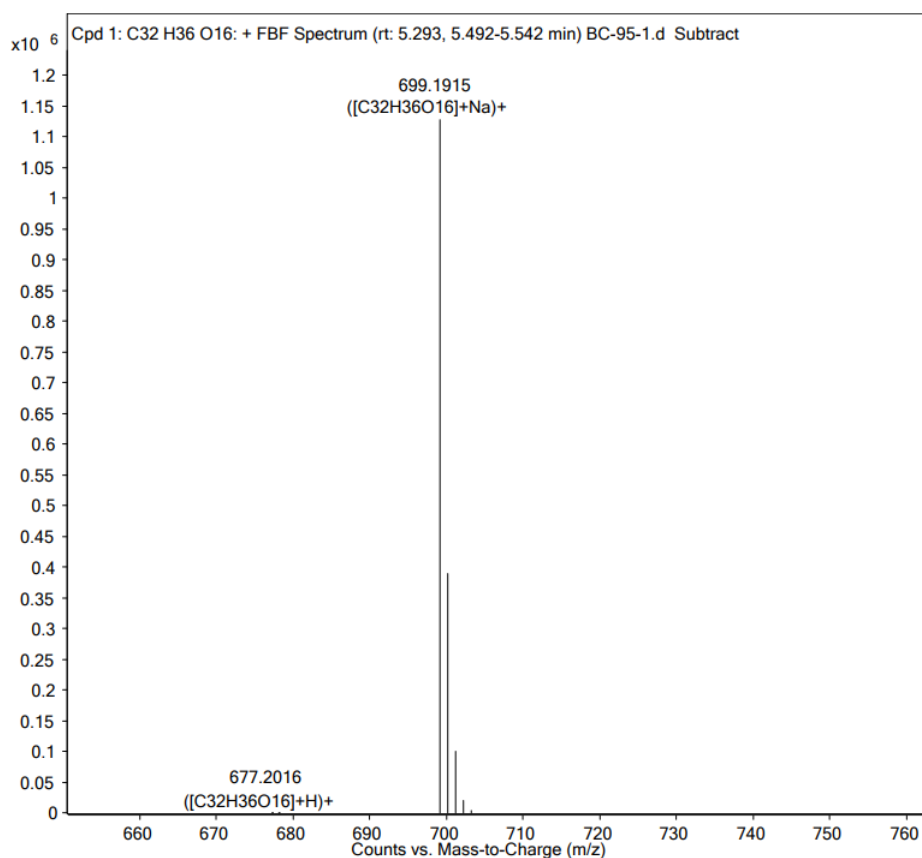

**Figure S49. (+) HRESIMS Spectrum of Compound 6**

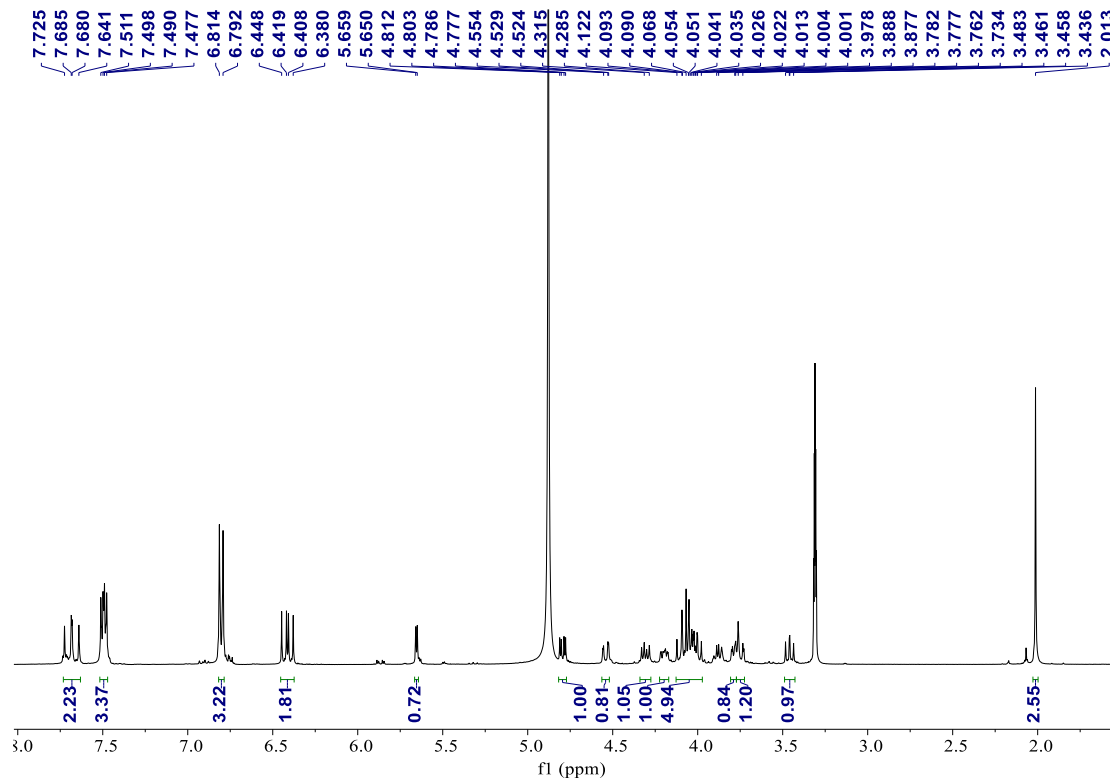

**Figure S50. <sup>1</sup>H NMR Spectrum of Compound 6 in MeOH-*d*<sub>4</sub>**



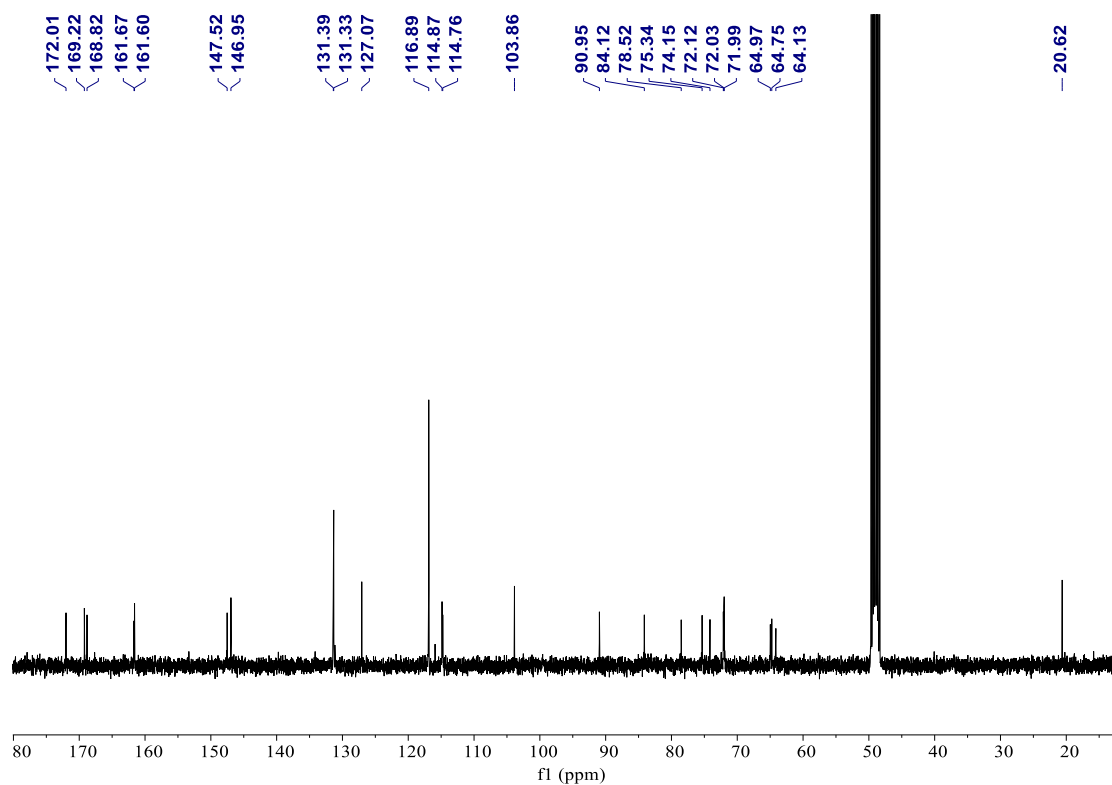

Figure S51.  $^{13}\text{C}$  NMR Spectrum of Compound **6** in  $\text{MeOH-}d_4$

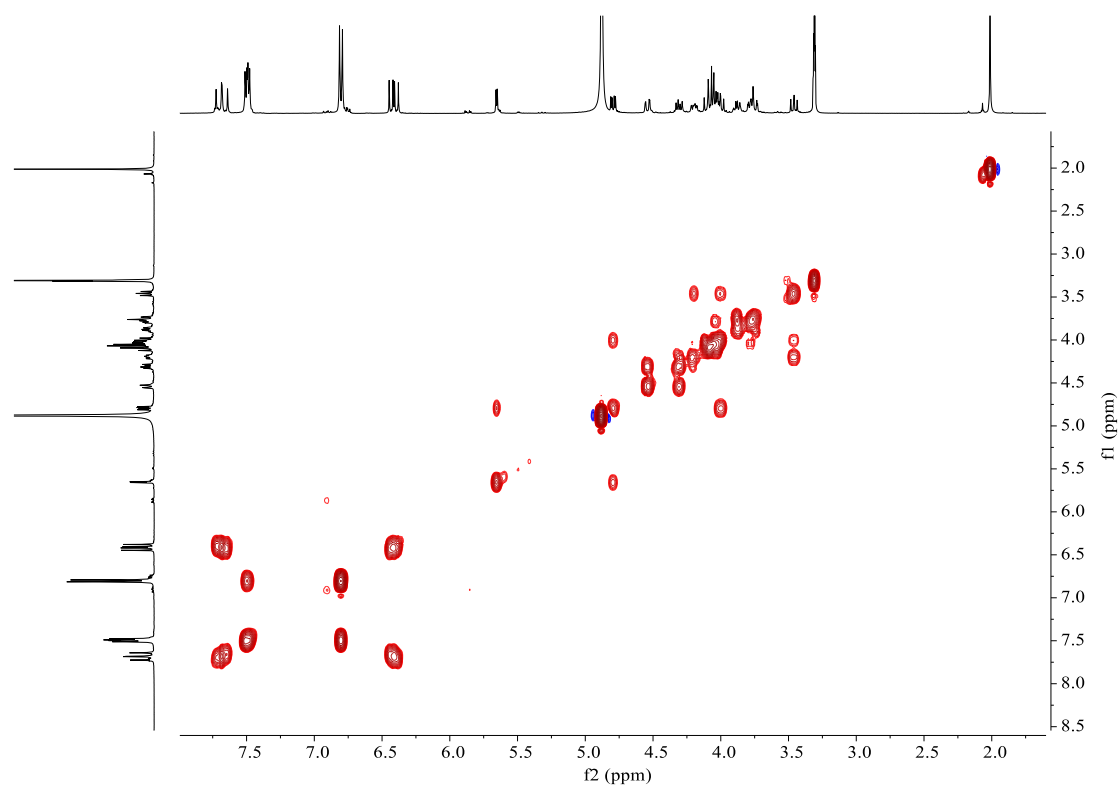

Figure S52.  $^1\text{H}$ - $^1\text{H}$  COSY Spectrum of Compound **6** in  $\text{MeOH-}d_4$

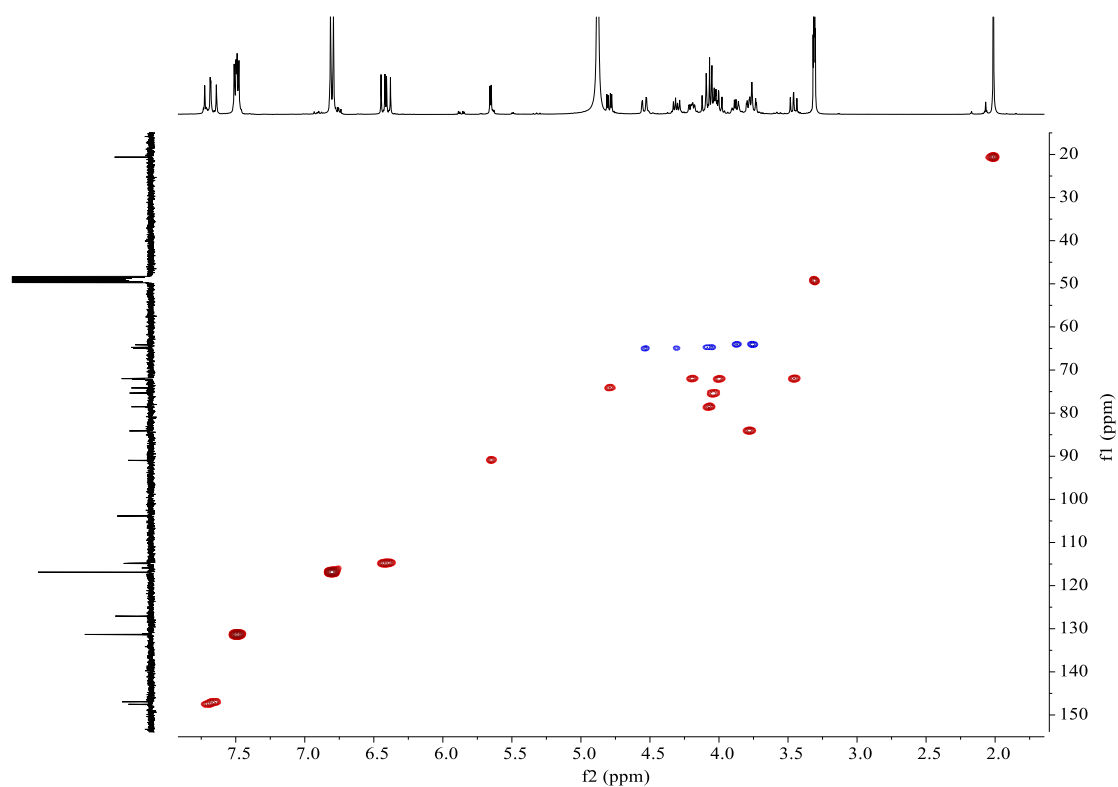

**Figure S53.** HSQC Spectrum of Compound **6** in MeOH- $d_4$

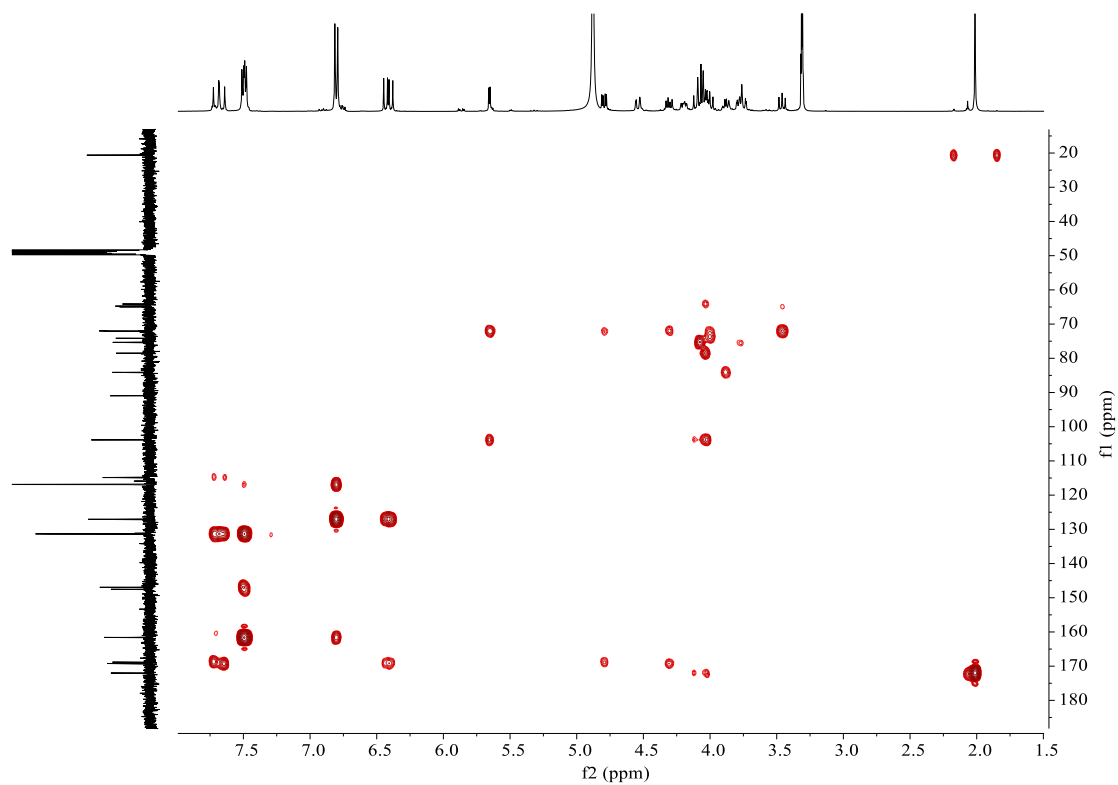

**Figure S54.** HMBC Spectrum of Compound **6** in MeOH- $d_4$

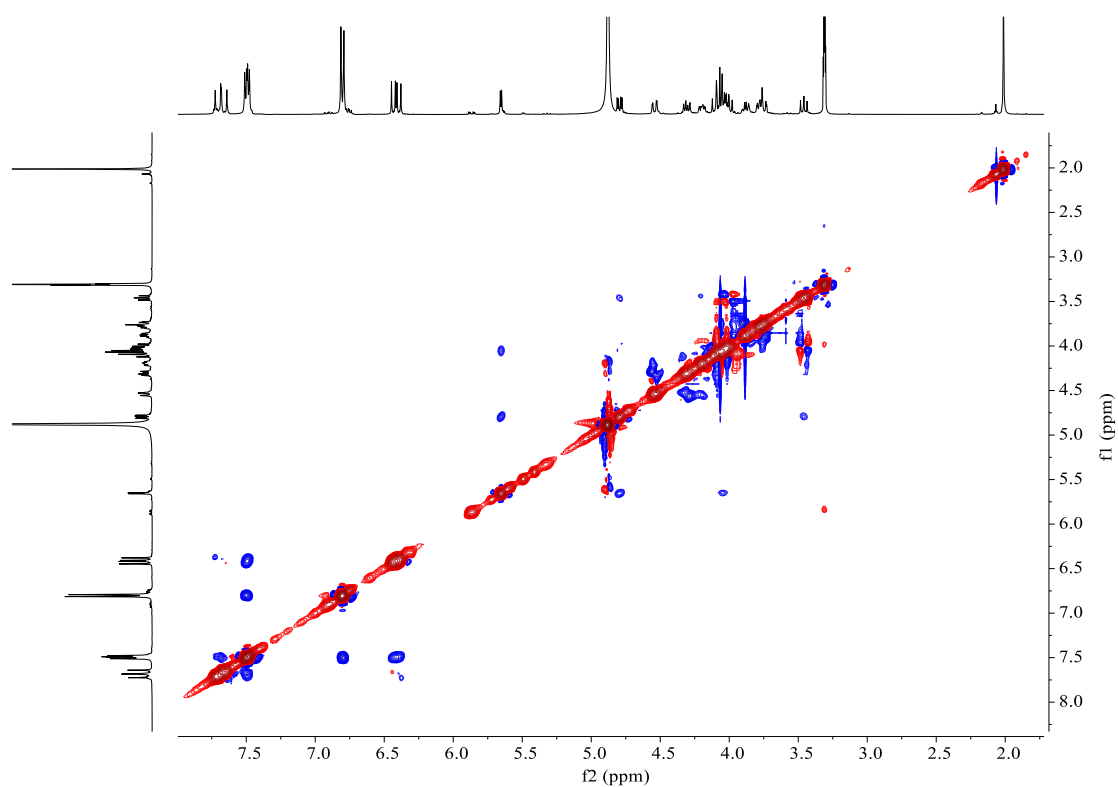

**Figure S55.** NOESY Spectrum of Compound **6** in MeOH- $d_4$

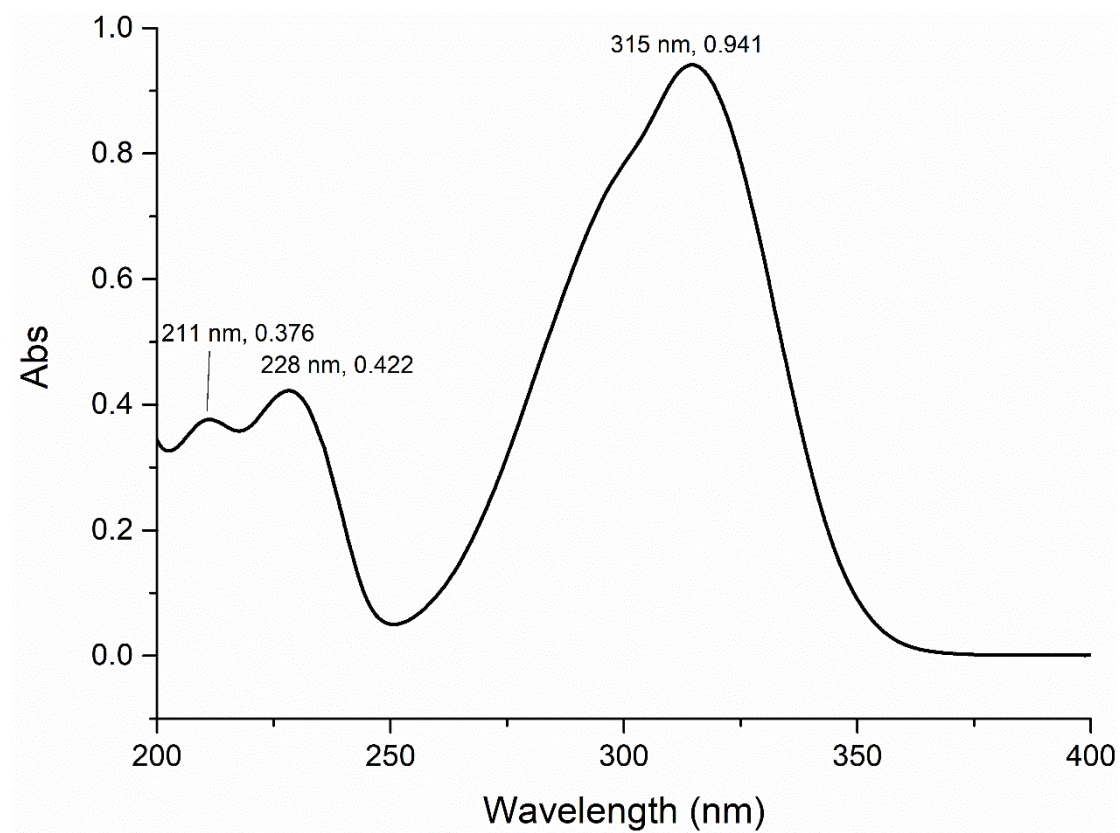

**Figure S56.** UV Spectrum of Compound **7**

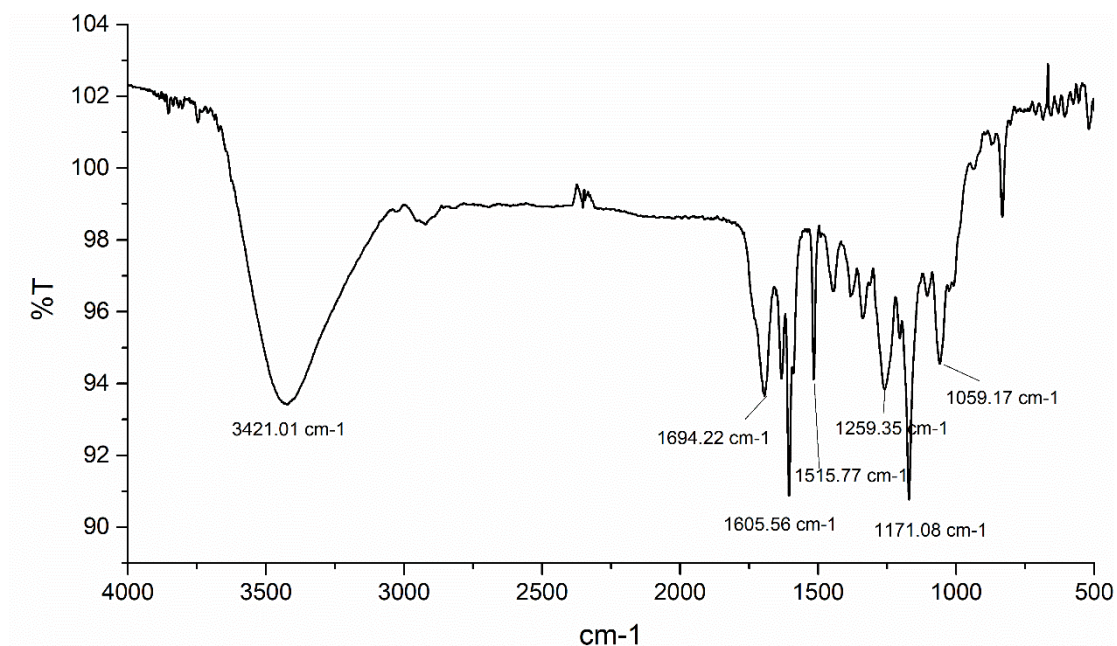

**Figure S57.** IR (KBr disc) Spectrum of Compound **7**

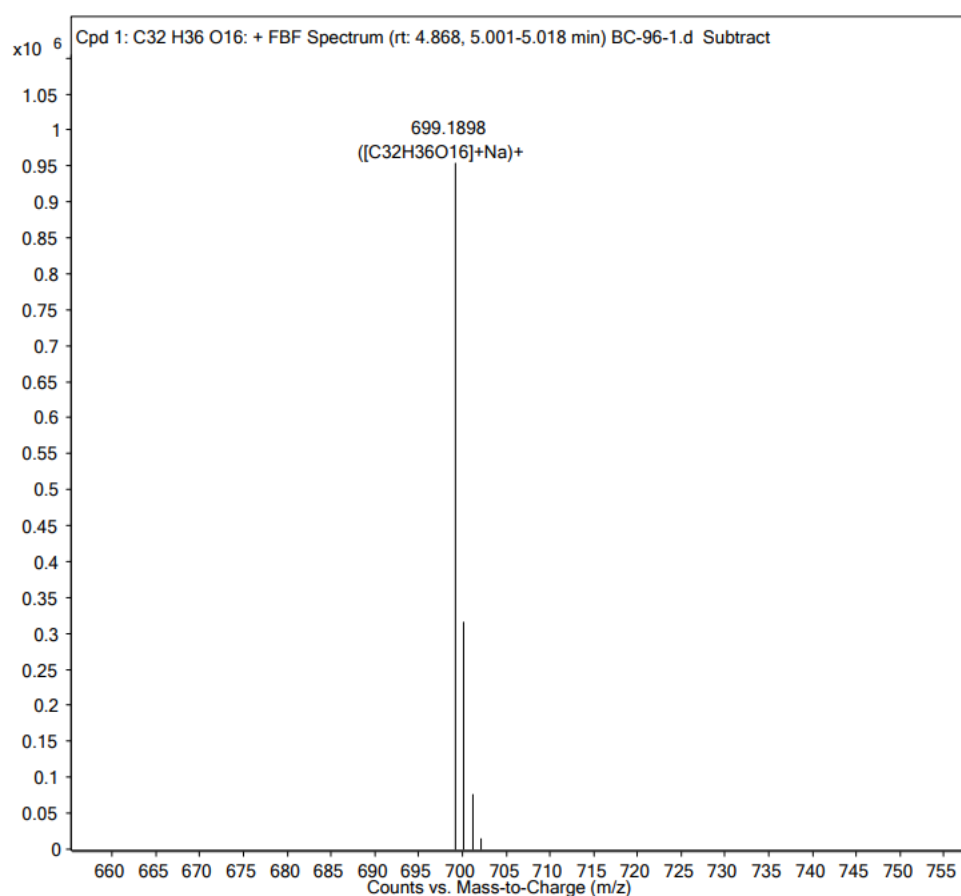

**Figure S58.** (+) HRESIMS Spectrum of Compound **7**

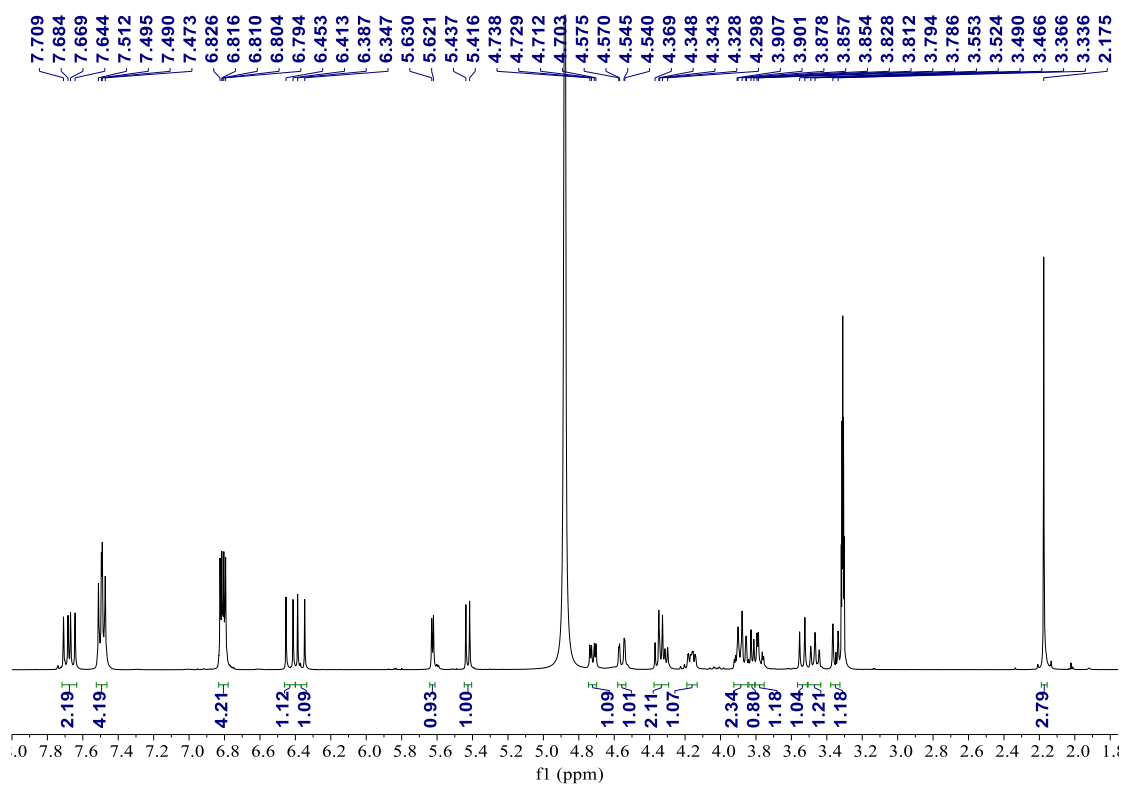

Figure S59. <sup>1</sup>H NMR Spectrum of Compound 7 in MeOH-*d*<sub>4</sub>

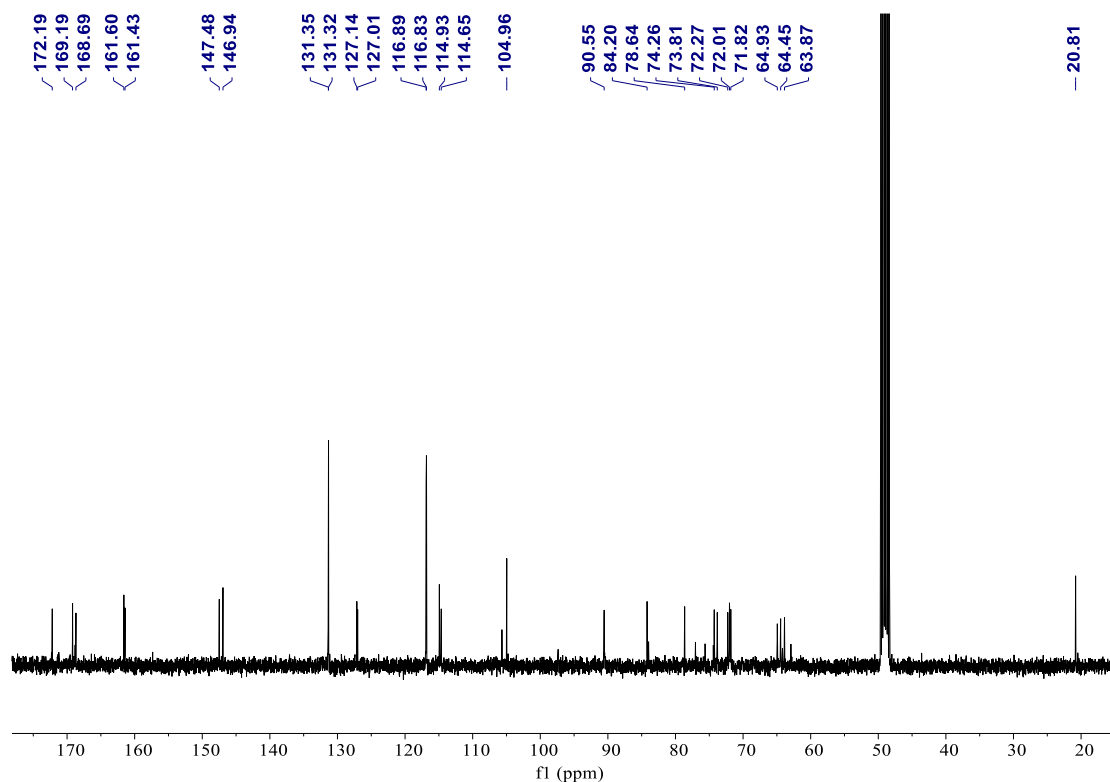

Figure S60. <sup>13</sup>C NMR Spectrum of Compound 7 in MeOH-*d*<sub>4</sub>

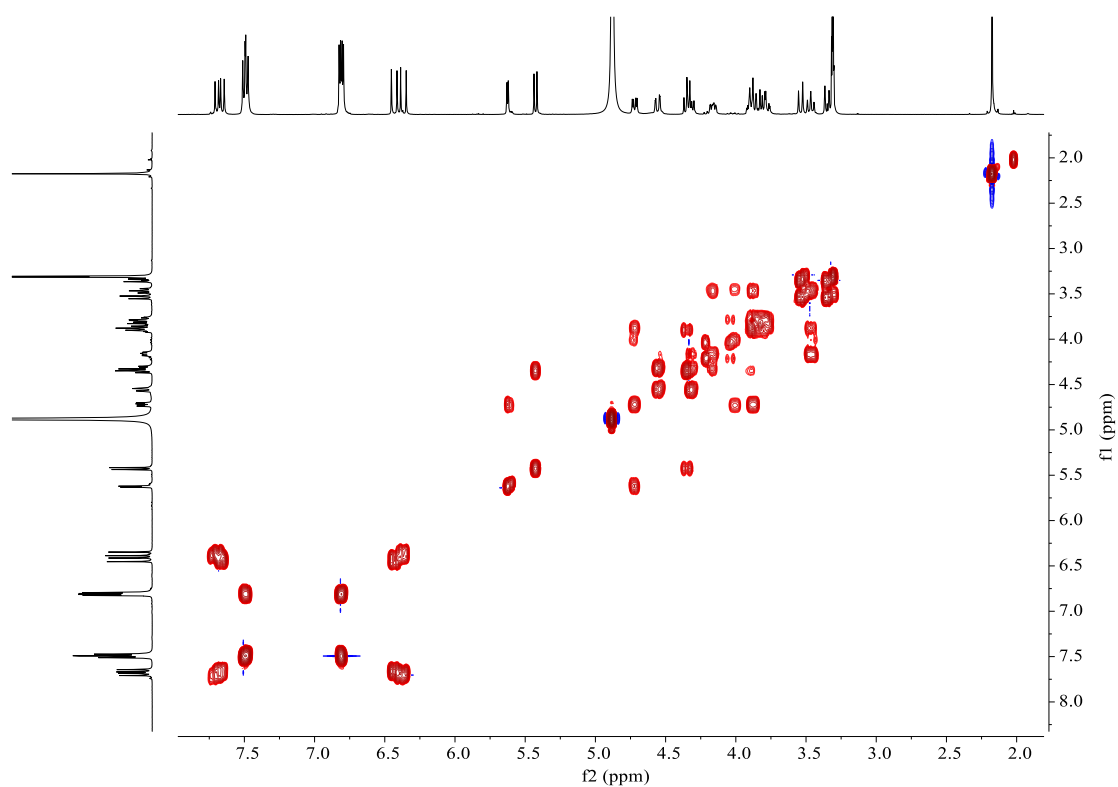

**Figure S61.**  $^1\text{H}$ - $^1\text{H}$  COSY Spectrum of Compound **7** in  $\text{MeOH-}d_4$

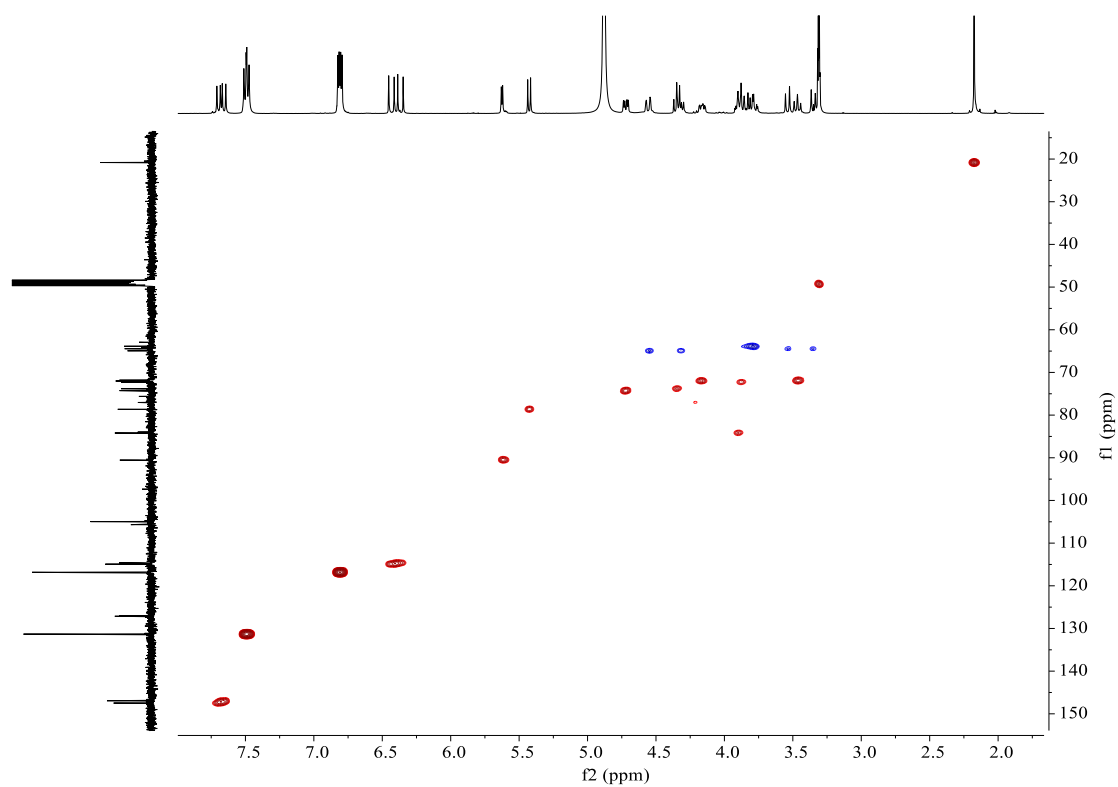

**Figure S62.** HSQC Spectrum of Compound **7** in  $\text{MeOH-}d_4$

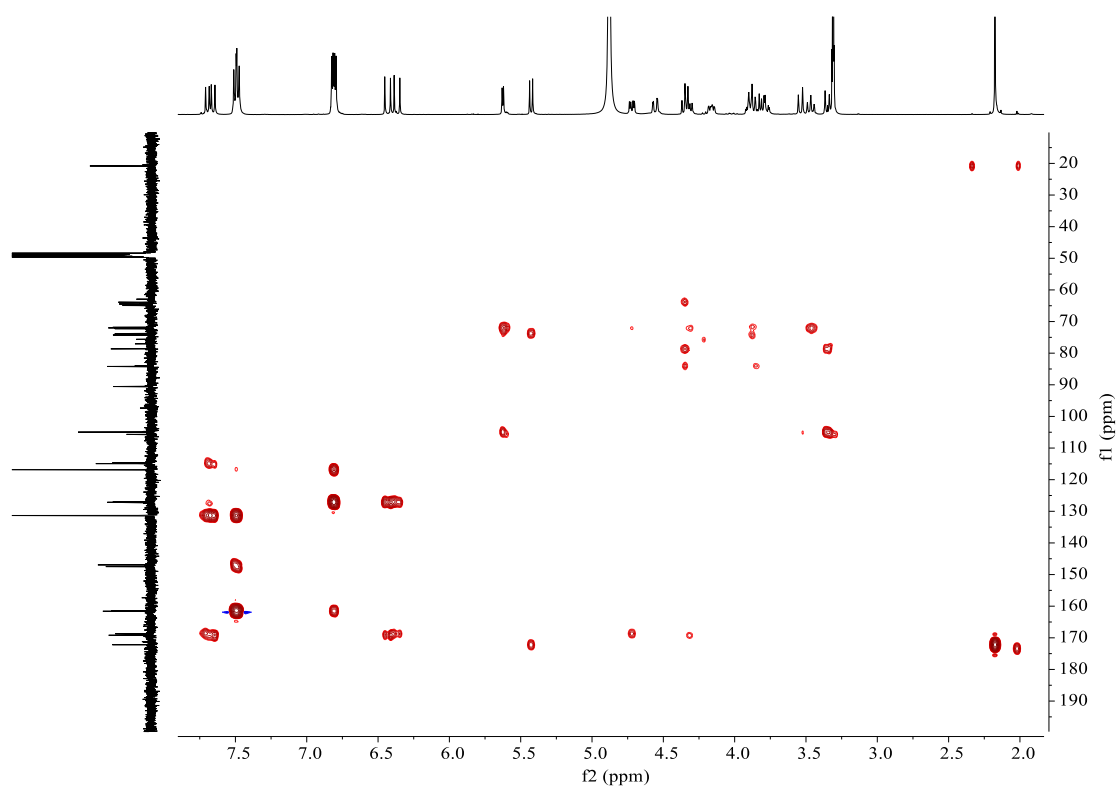

**Figure S63.** HMBC Spectrum of Compound **7** in MeOH- $d_4$

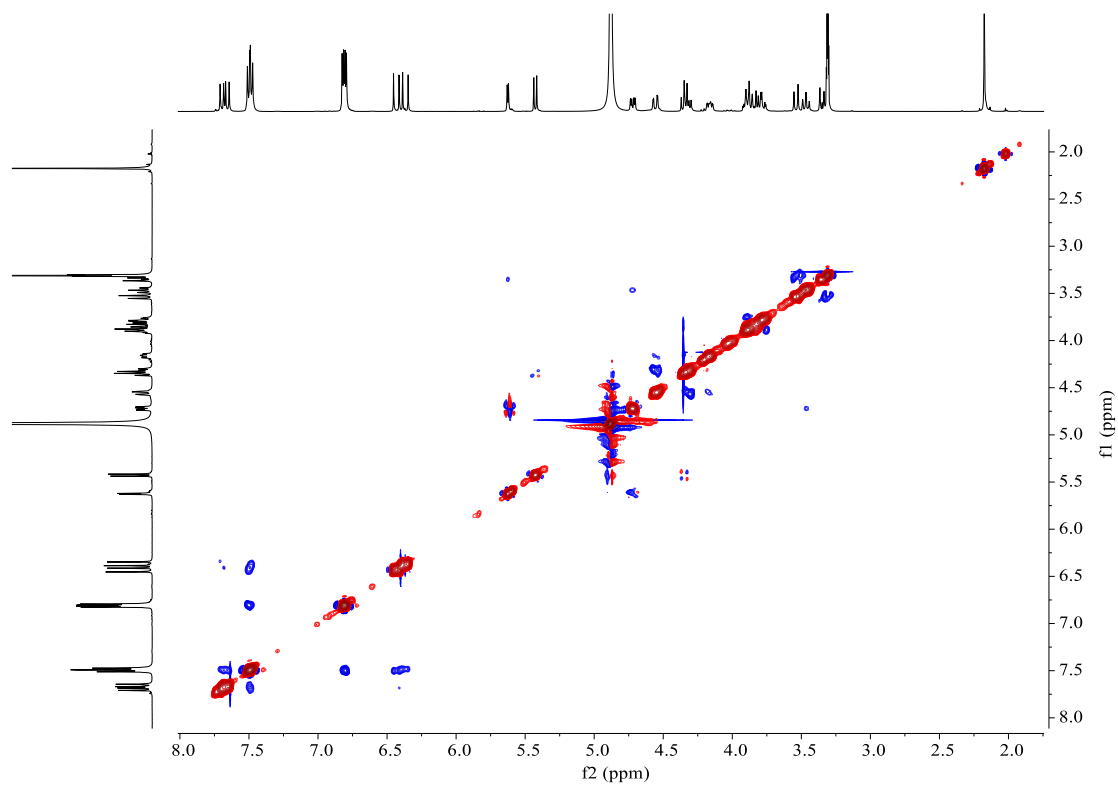

**Figure S64.** NOESY Spectrum of Compound **7** in MeOH- $d_4$



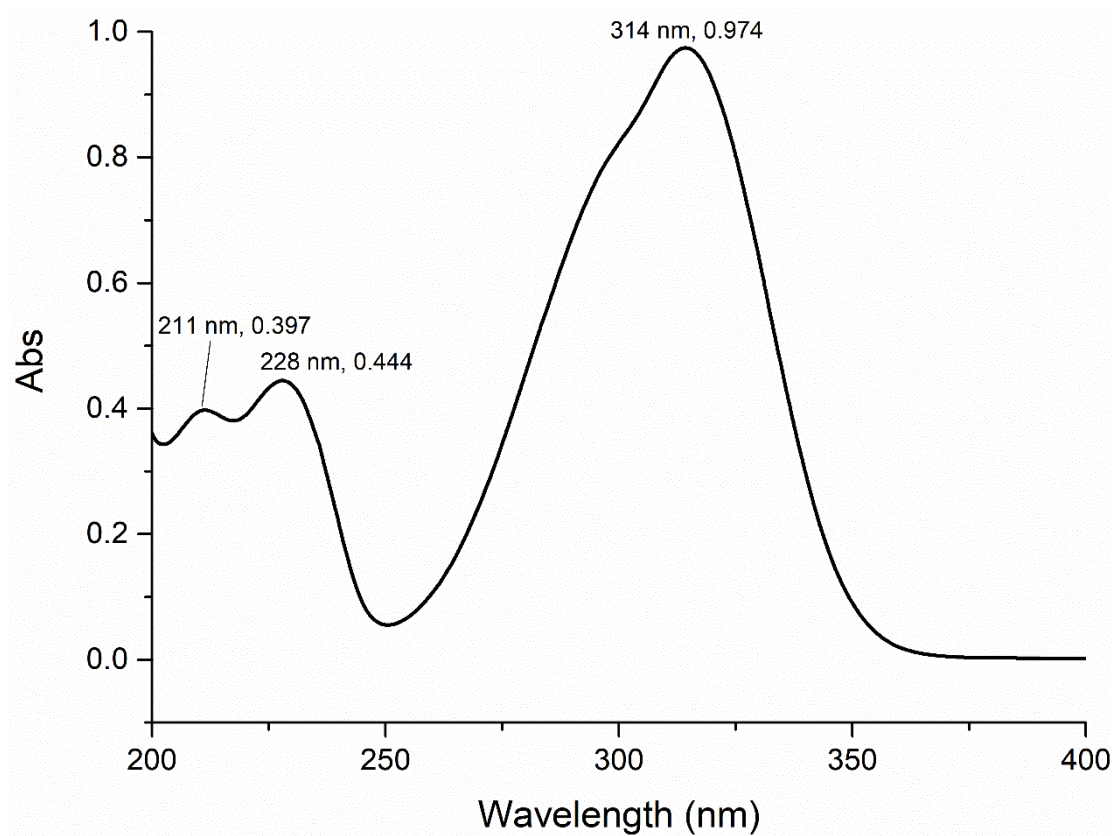

**Figure S65.** UV Spectrum of Compound **8**

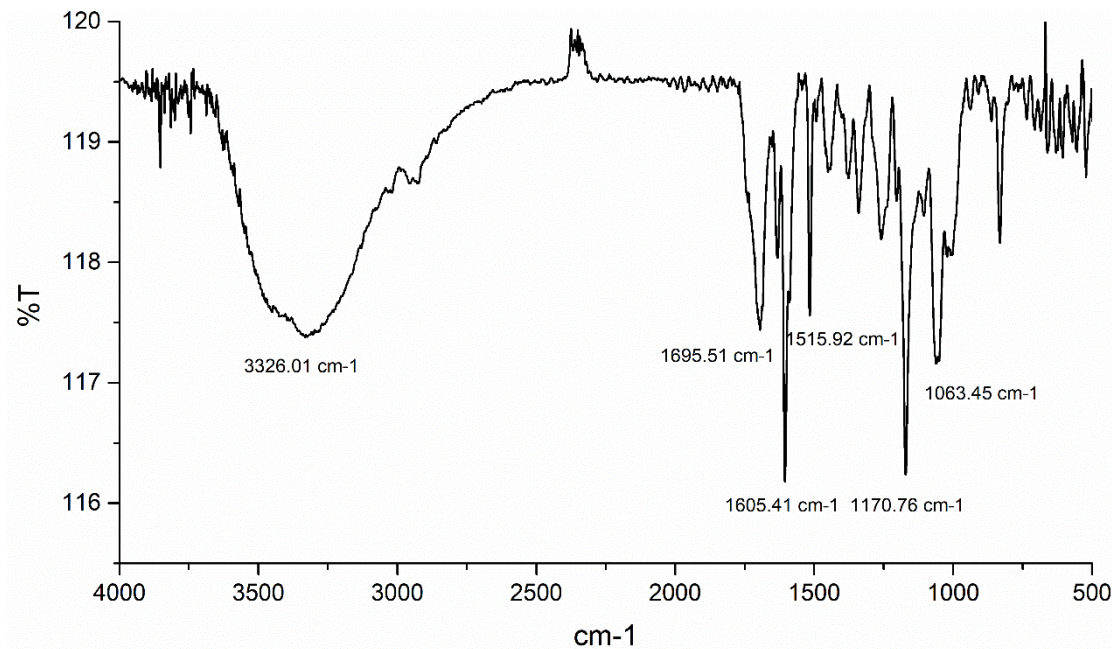

**Figure S66.** IR (KBr disc) Spectrum of Compound **8**



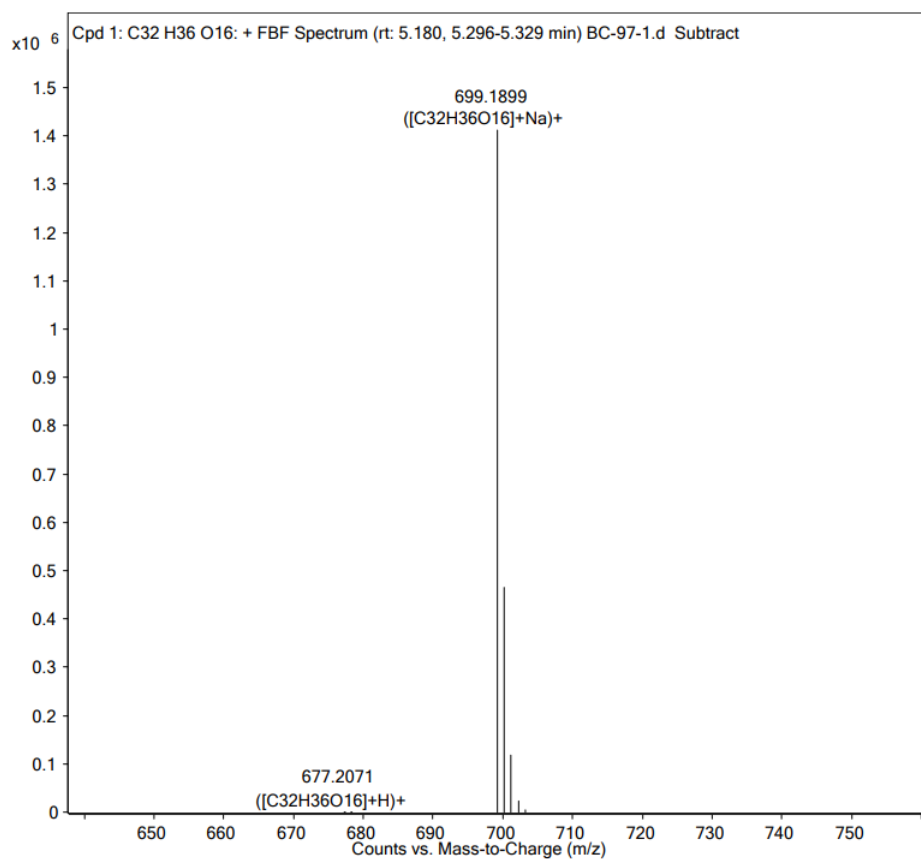

**Figure S67. (+) HRESIMS Spectrum of Compound 8**

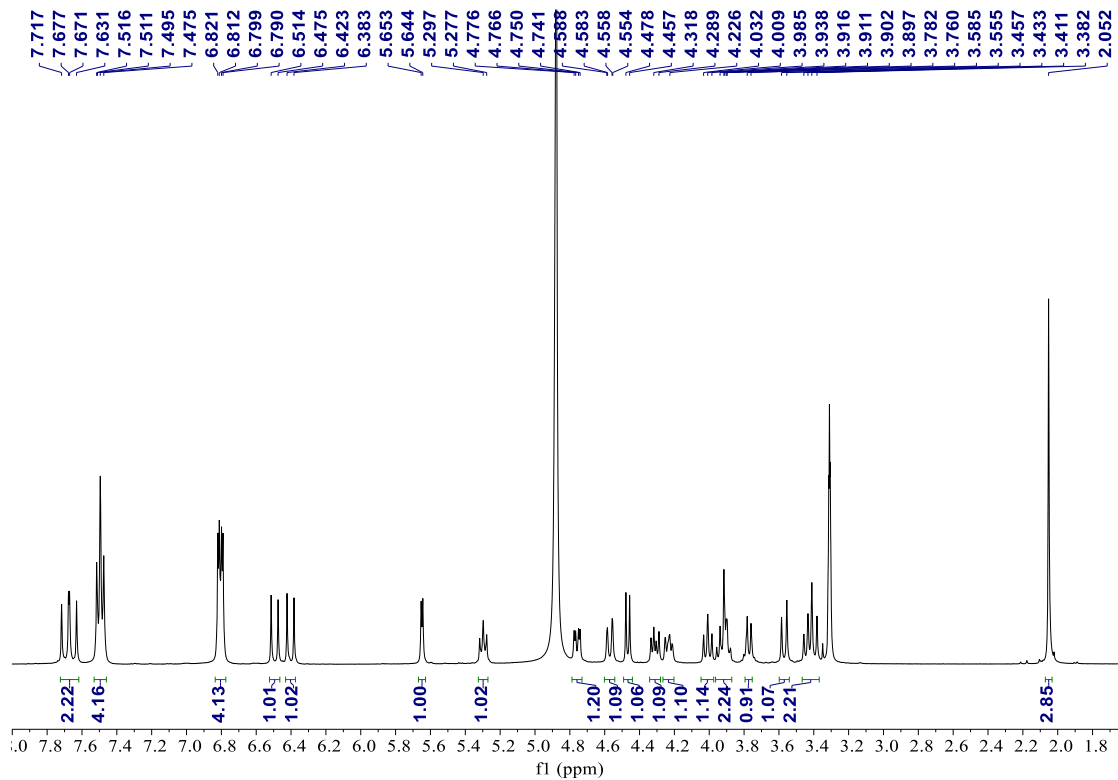

**Figure S68. <sup>1</sup>H NMR Spectrum of Compound 8 in MeOH-*d*<sub>4</sub>**

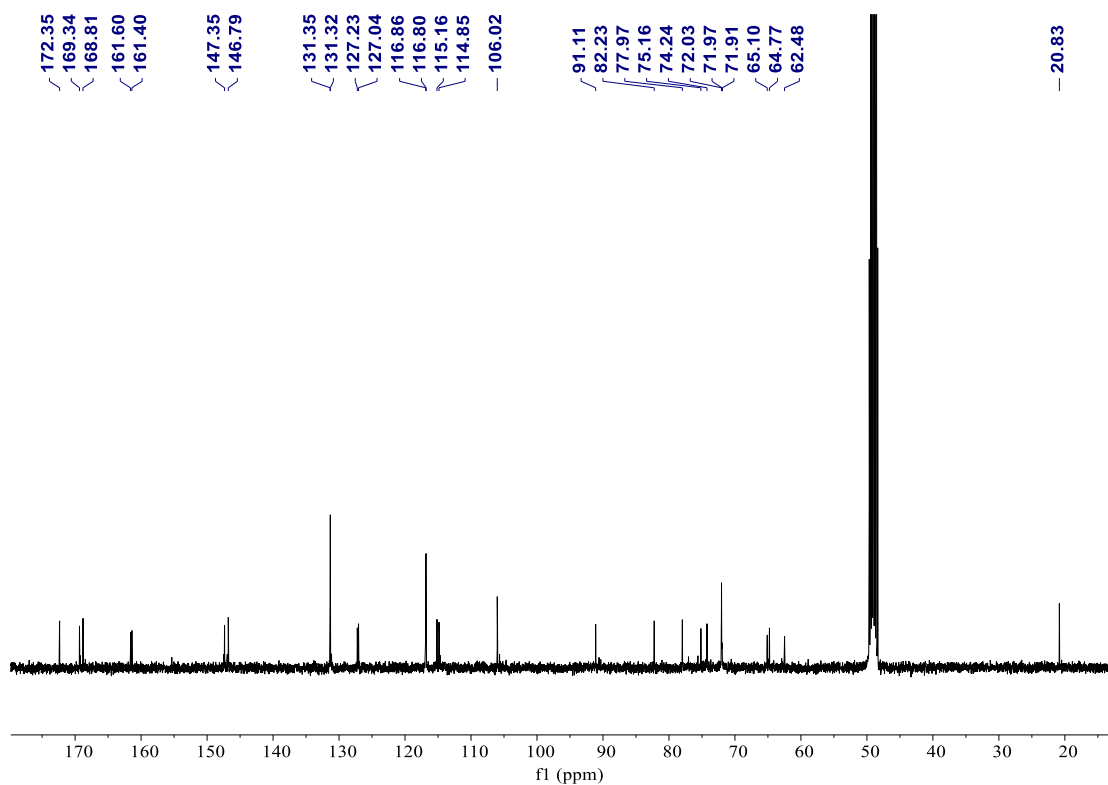

**Figure S69.**  $^{13}\text{C}$  NMR Spectrum of Compound **8** in  $\text{MeOH-}d_4$

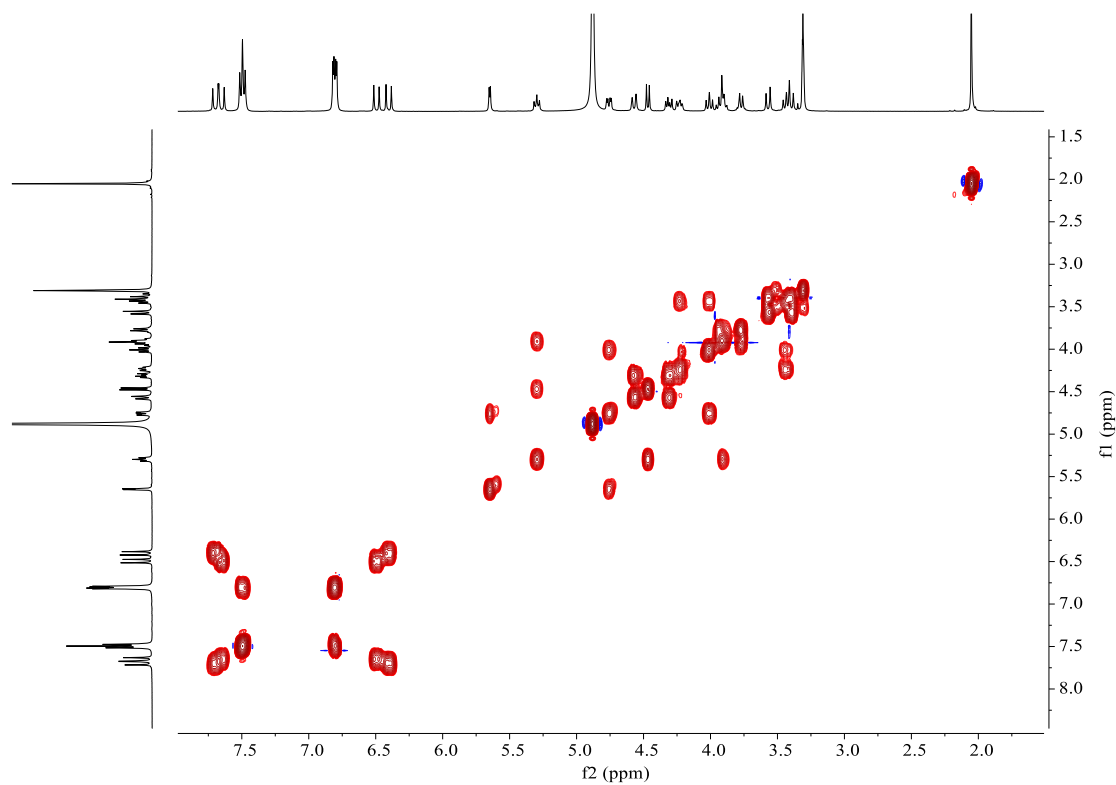

**Figure S70.**  $^1\text{H}$ – $^1\text{H}$  COSY Spectrum of Compound **8** in  $\text{MeOH-}d_4$

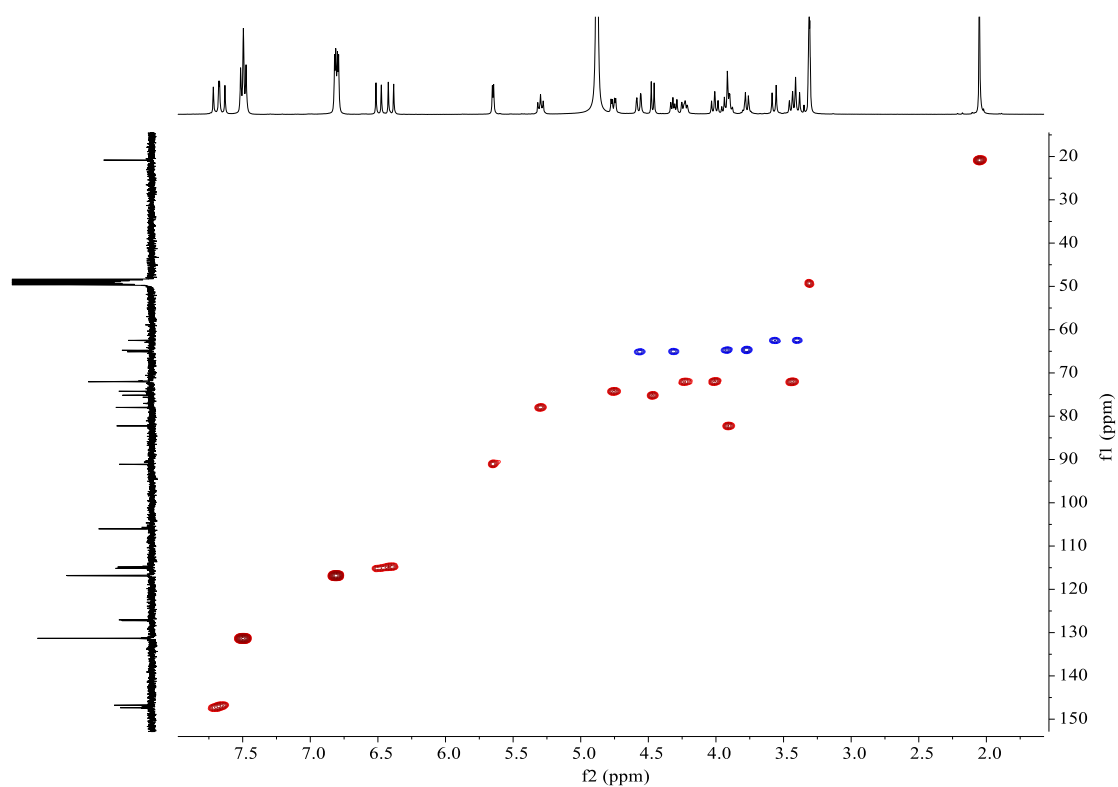

**Figure S71.** HSQC Spectrum of Compound **8** in MeOH- $d_4$

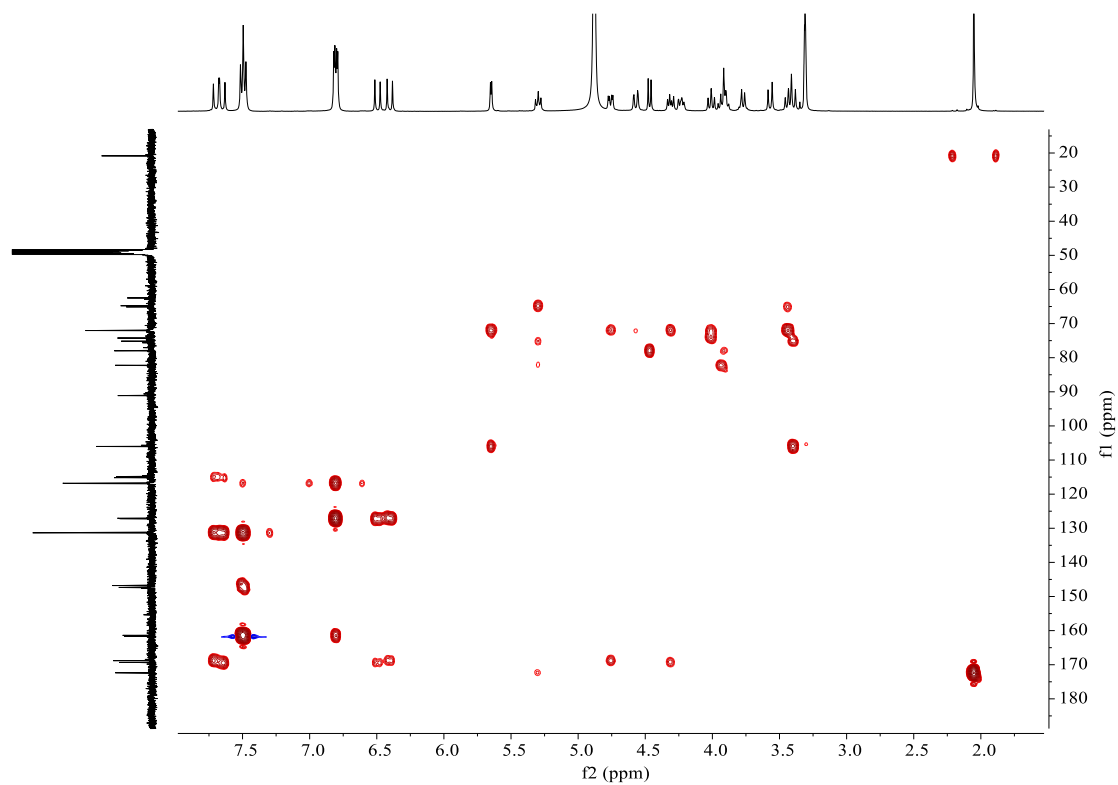

**Figure S72.** HMBC Spectrum of Compound **8** in MeOH- $d_4$

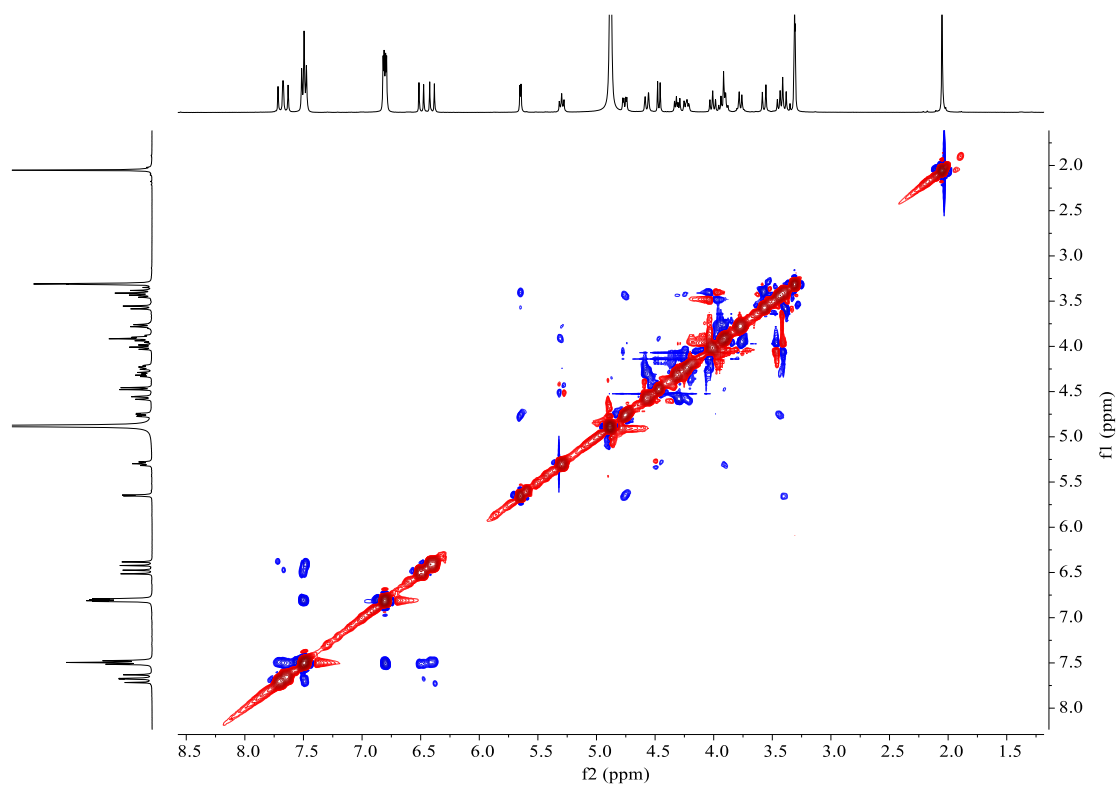

**Figure S73.** NOESY Spectrum of Compound **8** in MeOH- $d_4$

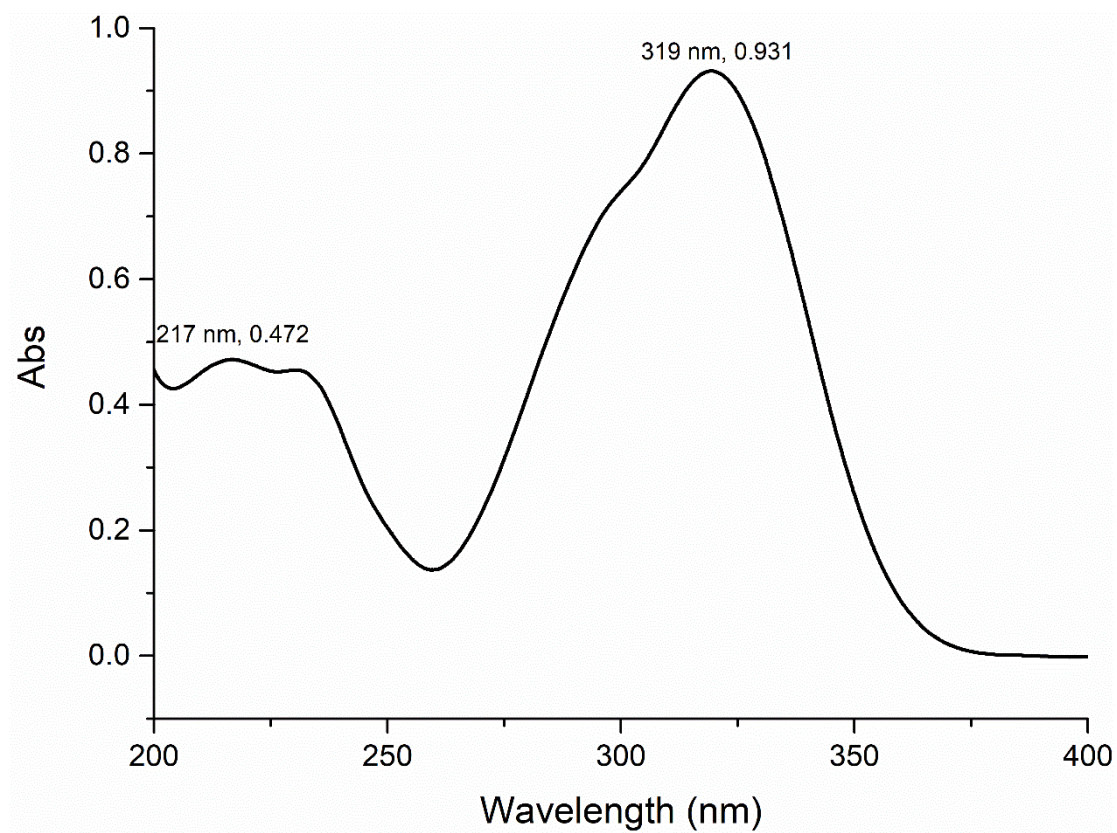

**Figure S74.** UV Spectrum of Compound **9**

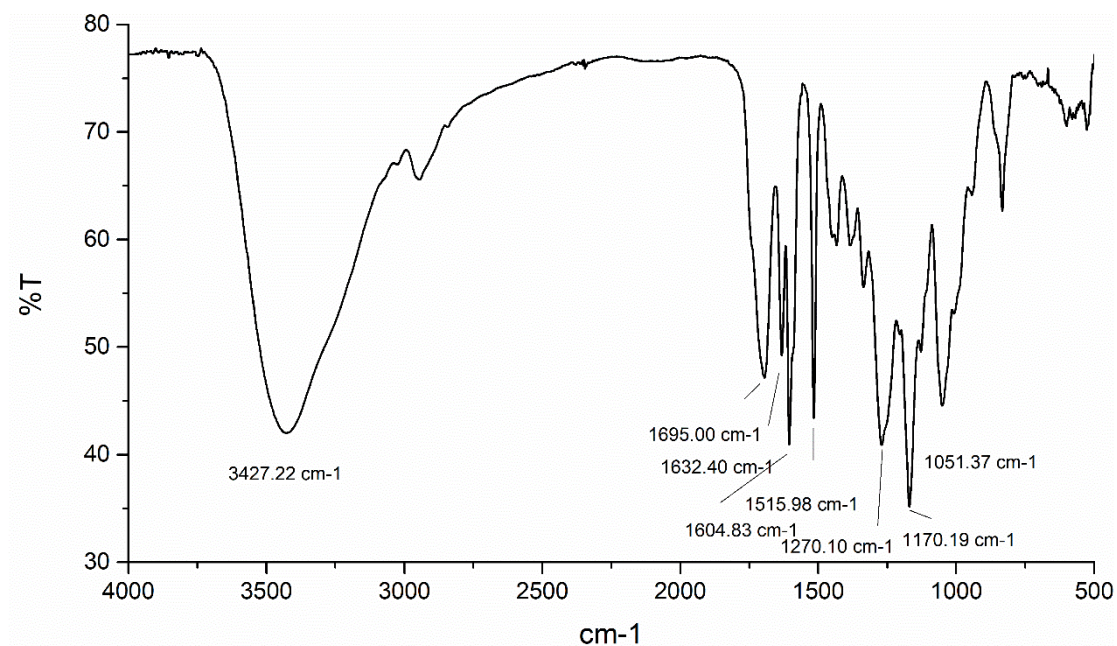

**Figure S75.** IR (KBr disc) Spectrum of Compound **9**

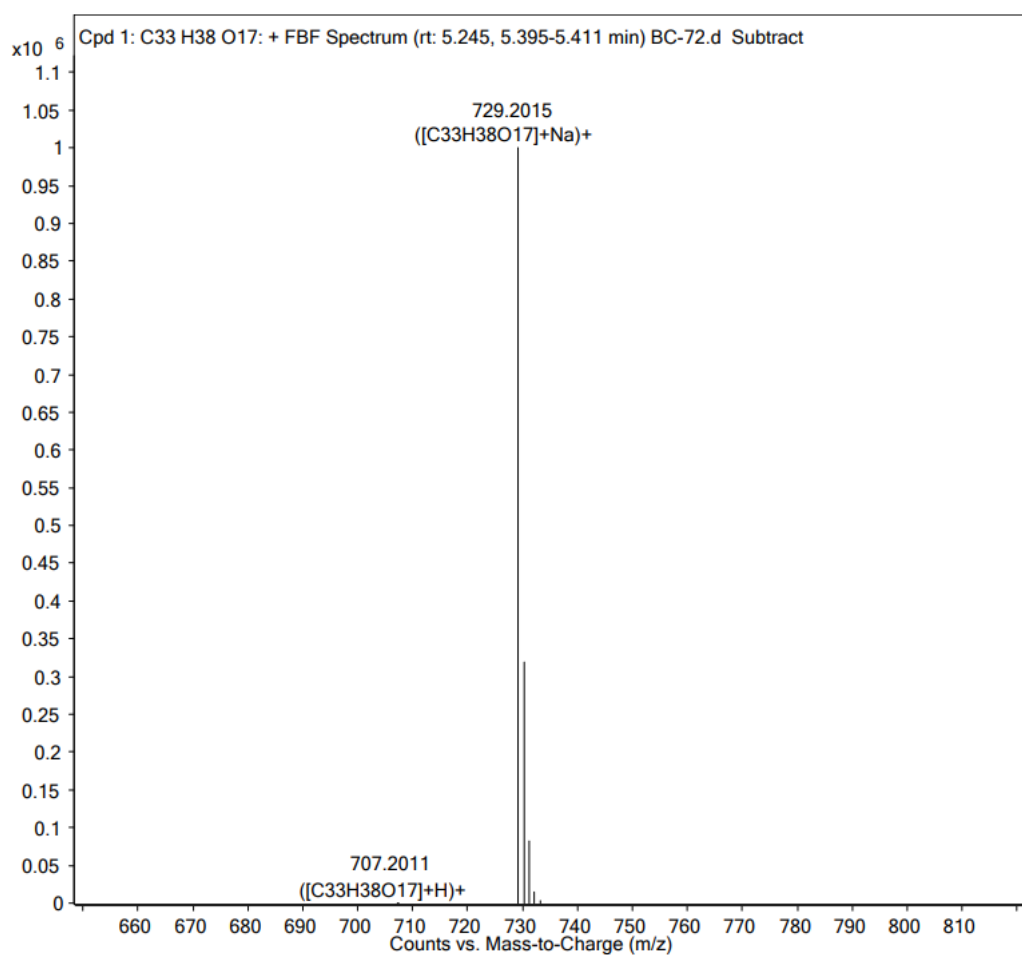

**Figure S76.** (+) HRESIMS Spectrum of Compound **9**

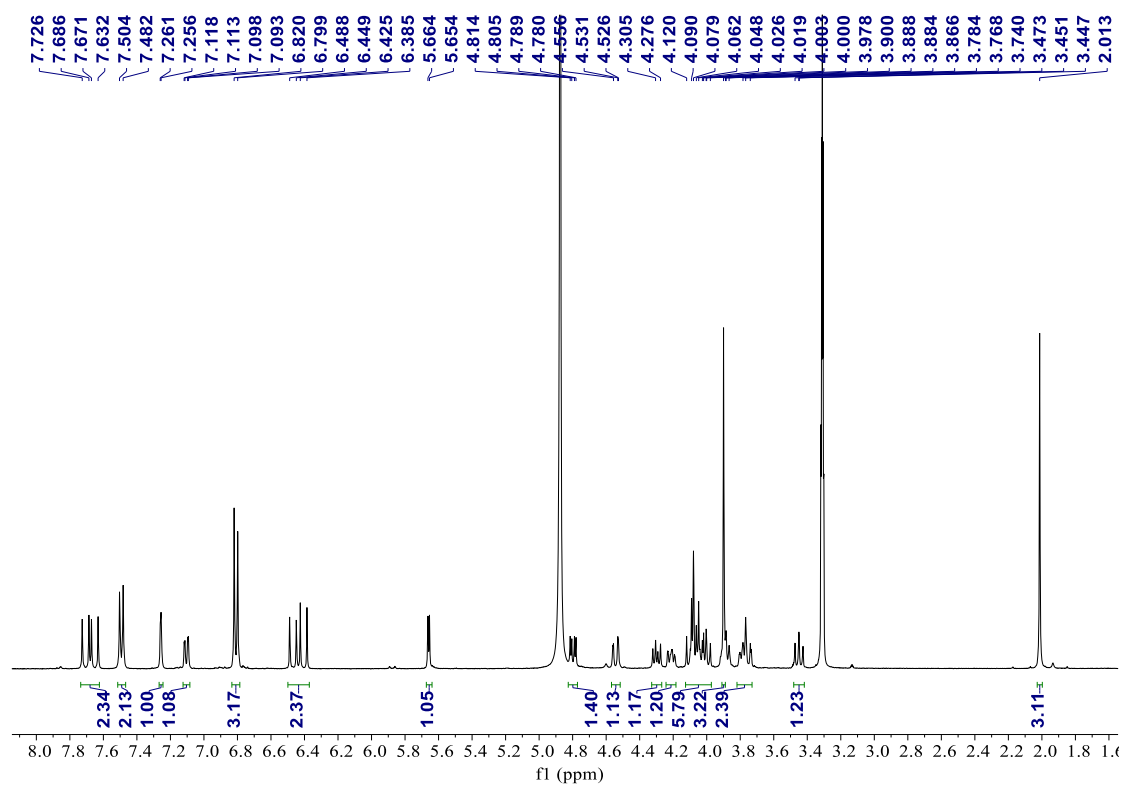

**Figure S77.** <sup>1</sup>H NMR Spectrum of Compound **9** in MeOH-*d*<sub>4</sub>

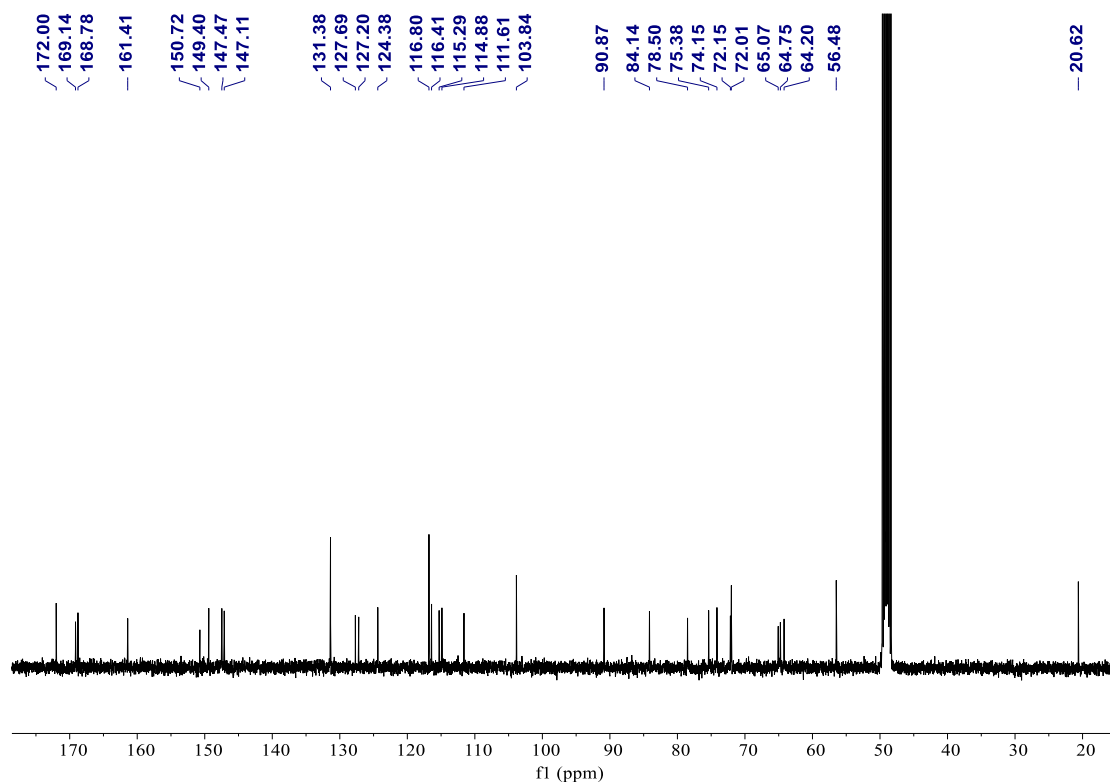

**Figure S78.** <sup>13</sup>C NMR Spectrum of Compound **9** in MeOH-*d*<sub>4</sub>

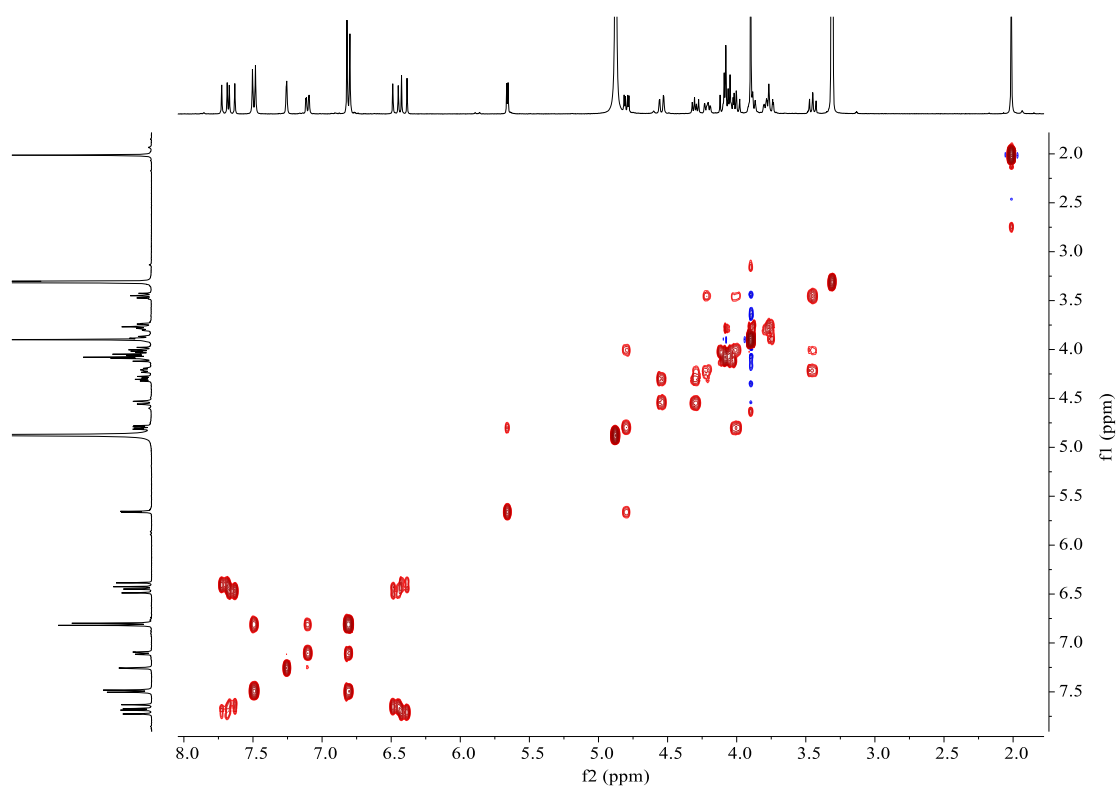

**Figure S79.**  $^1\text{H}$ - $^1\text{H}$  COSY Spectrum of Compound **9** in  $\text{MeOH-}d_4$

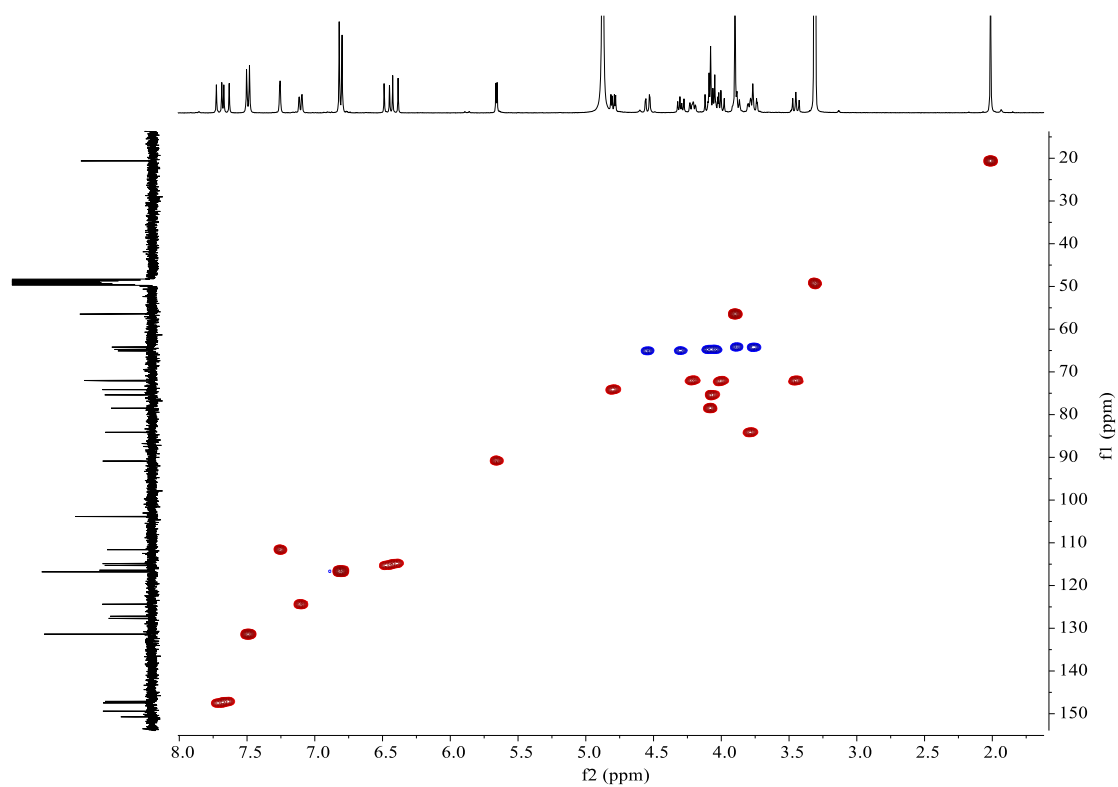

**Figure S80.** HSQC Spectrum of Compound **9** in  $\text{MeOH-}d_4$

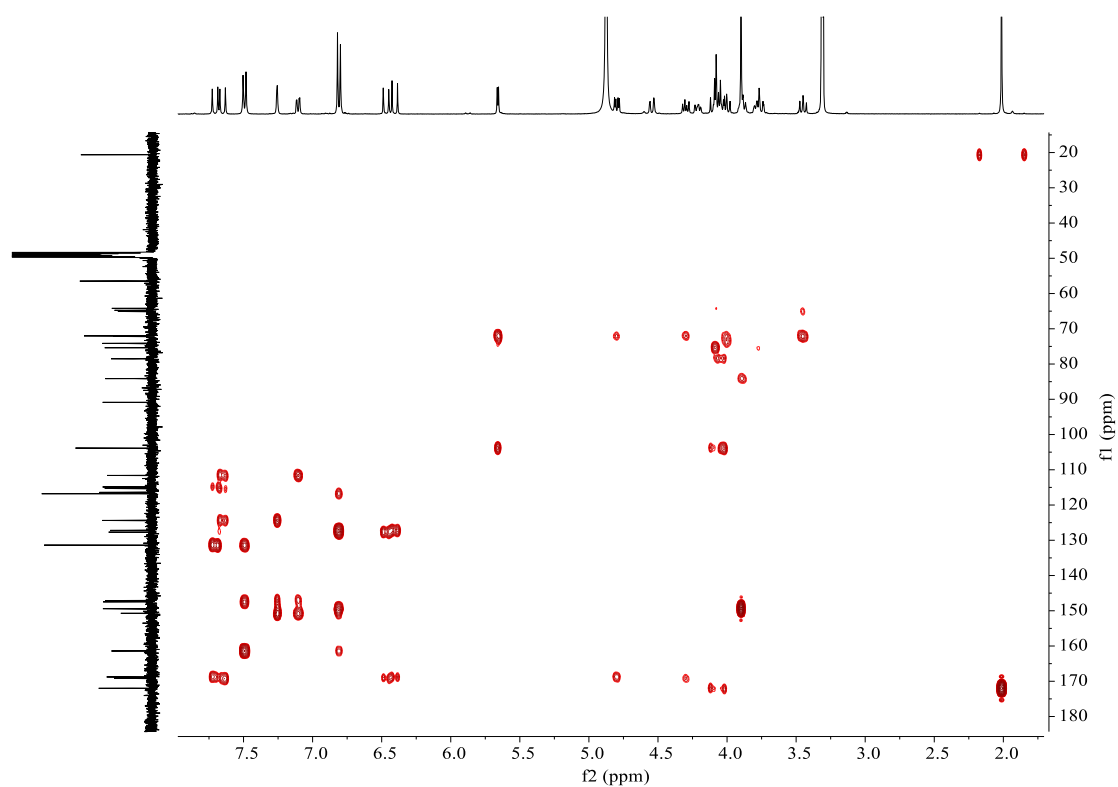

**Figure S81.** HMBC Spectrum of Compound **9** in MeOH- $d_4$

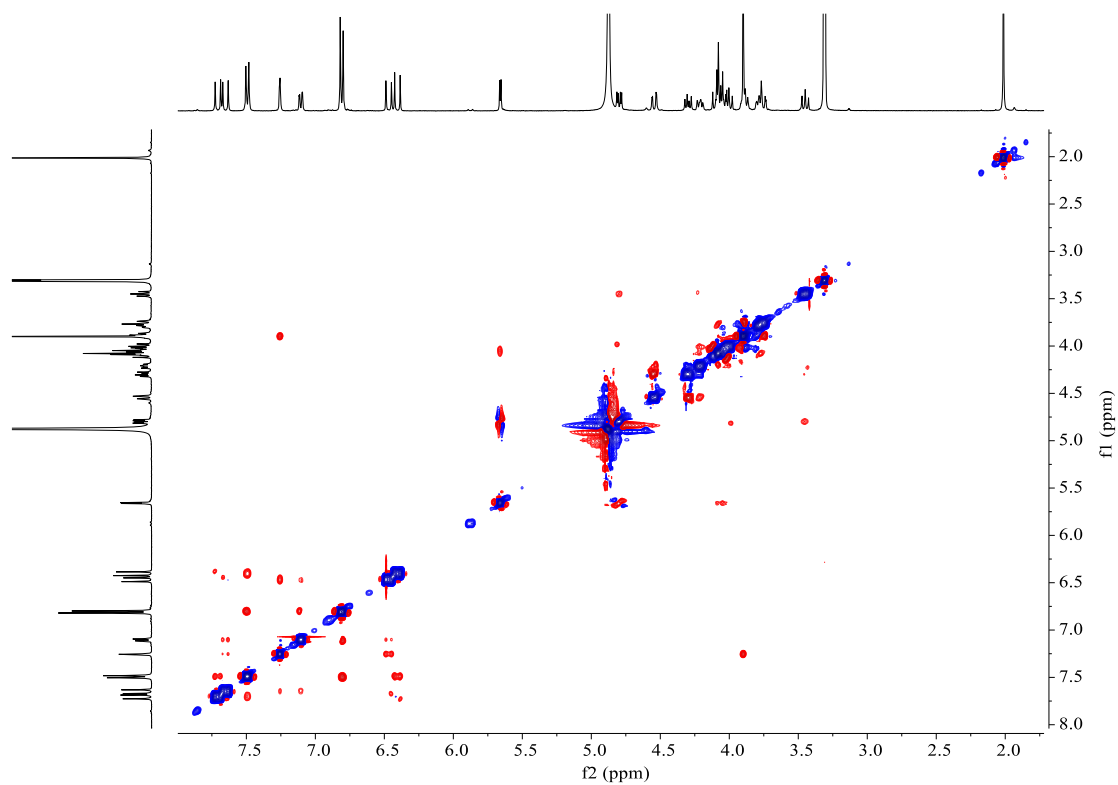

**Figure S82.** NOESY Spectrum of Compound **9** in MeOH- $d_4$



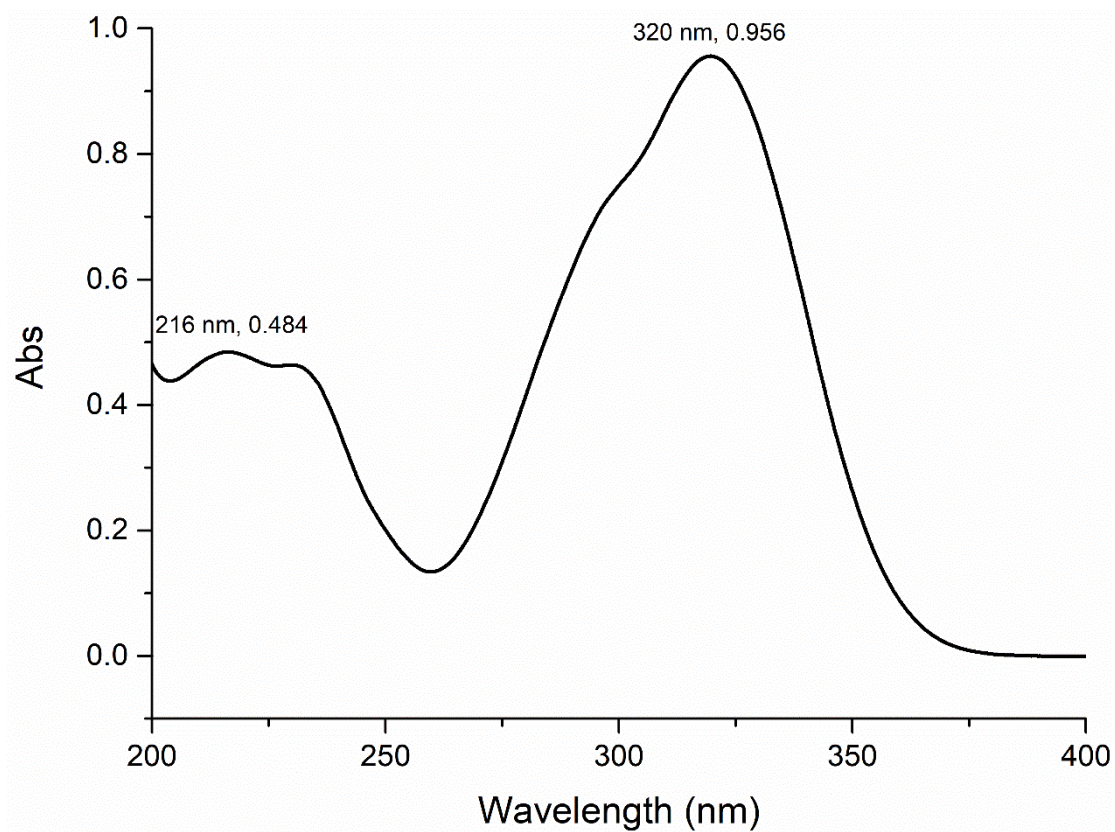

**Figure S83.** UV Spectrum of Compound **10**

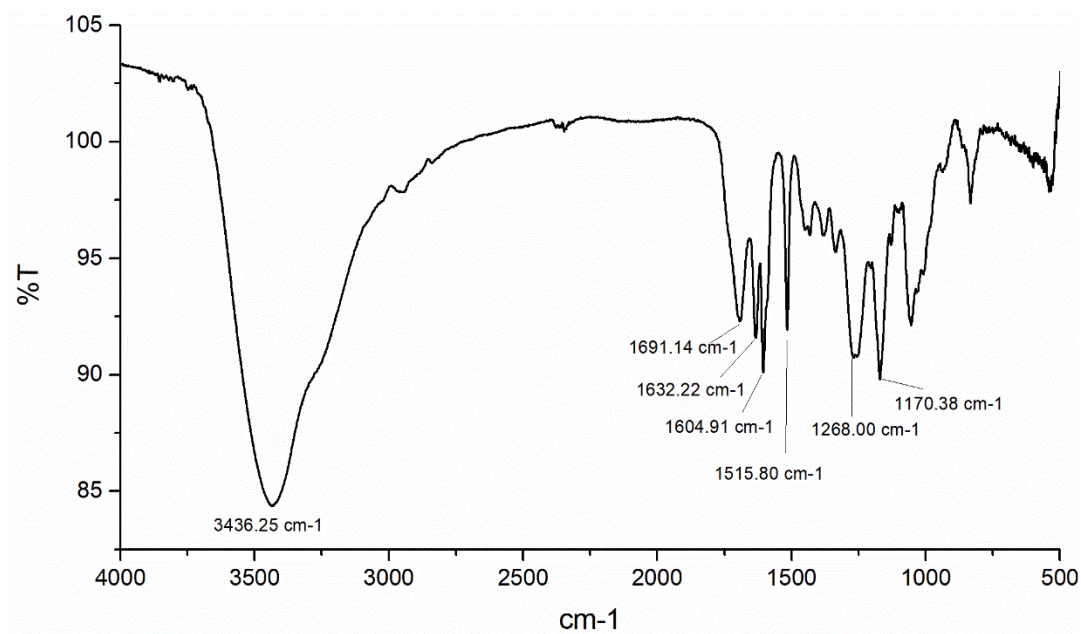

**Figure S84.** IR (KBr disc) Spectrum of Compound **10**

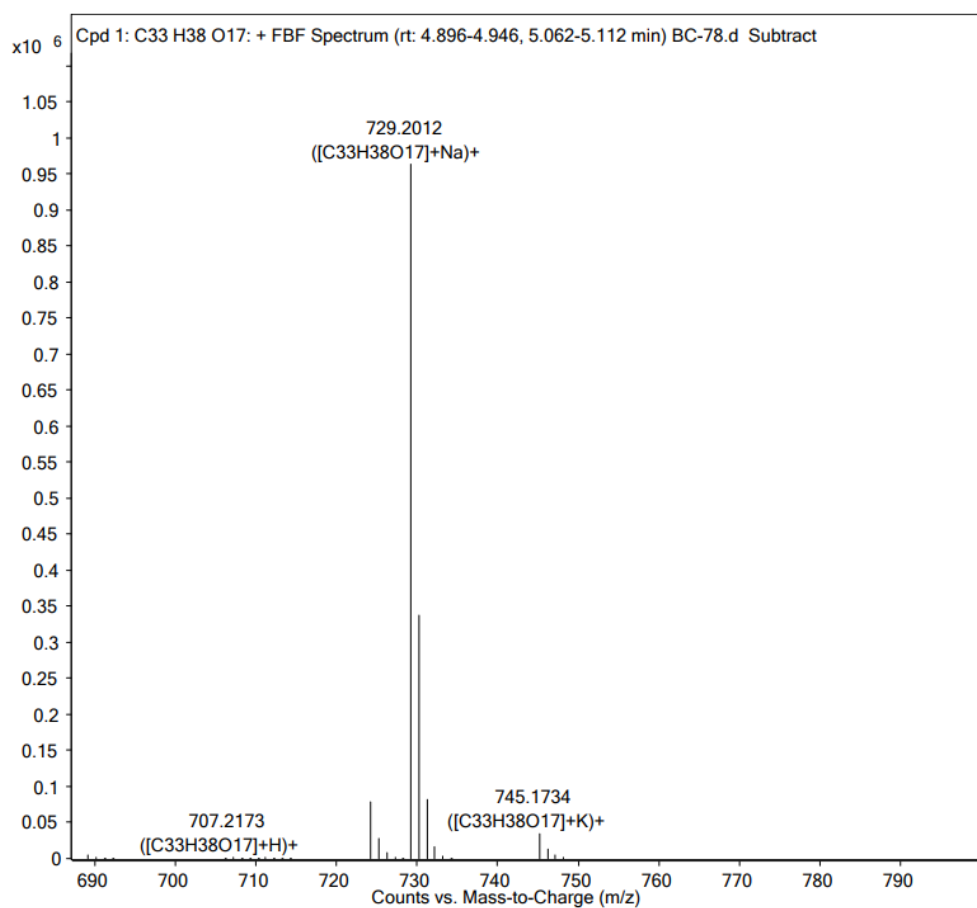

**Figure S85.** (+) HRESIMS Spectrum of Compound **10**

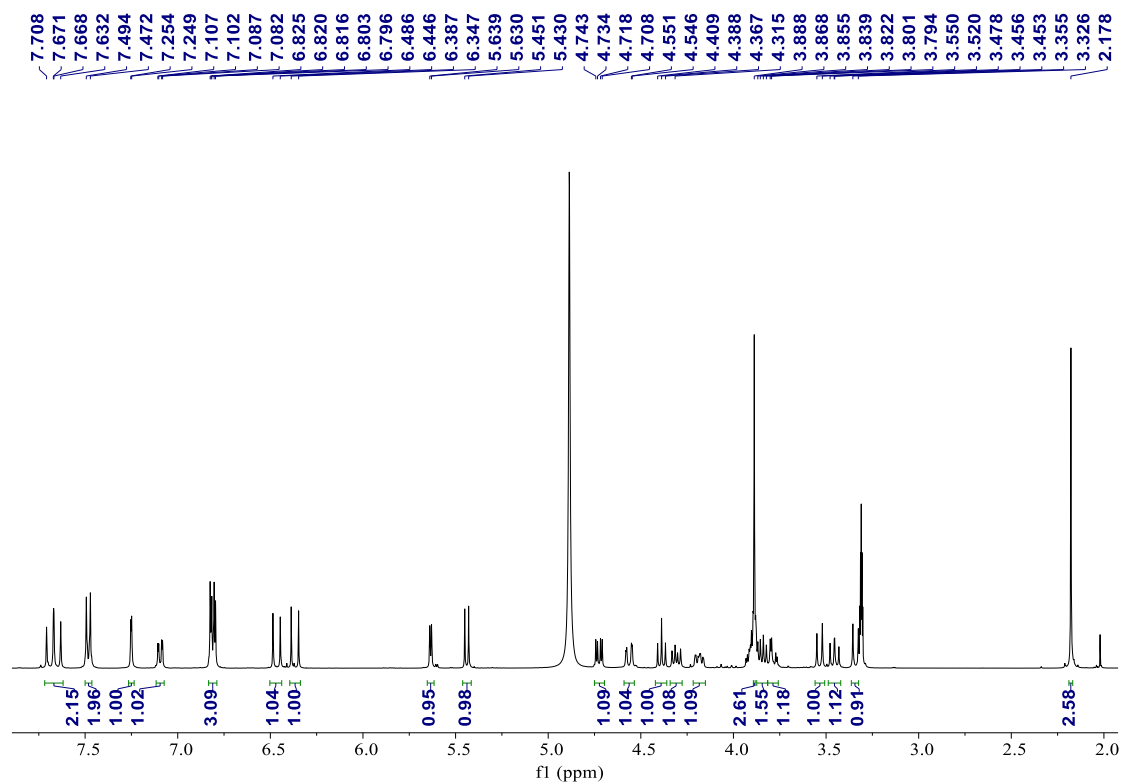

**Figure S86.**  $^1H$  NMR Spectrum of Compound **10** in  $MeOH-d_4$

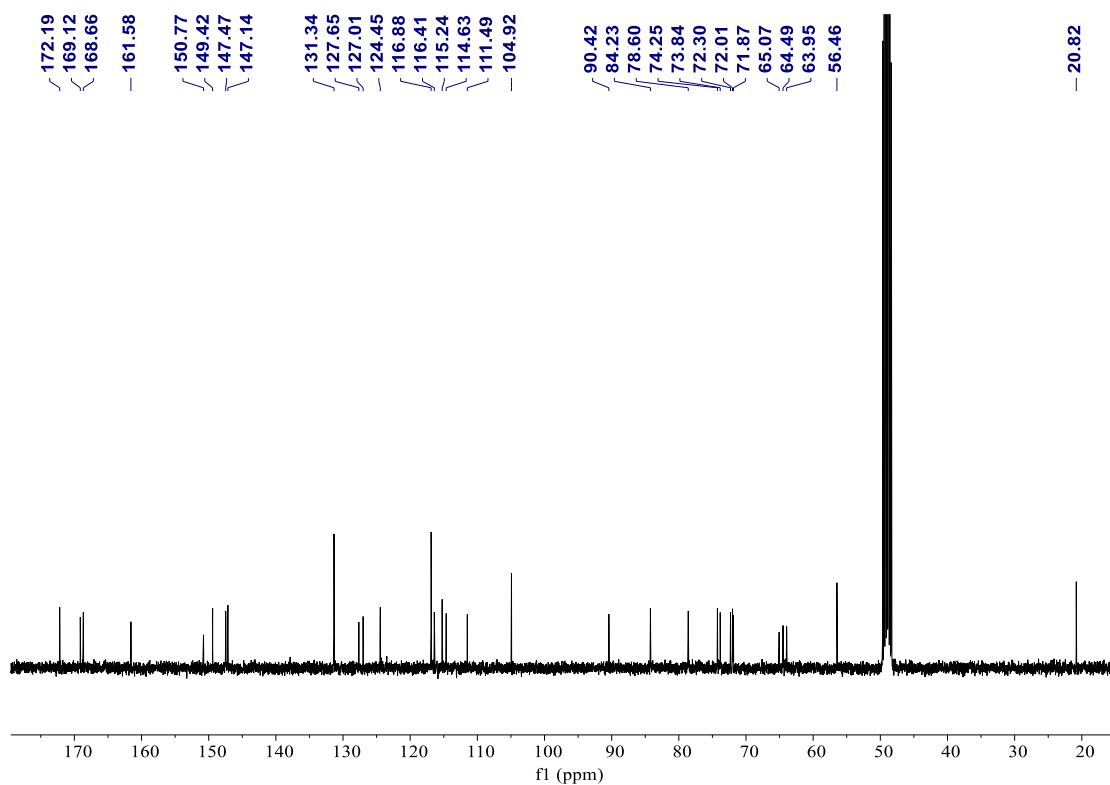

**Figure S87.**  $^{13}\text{C}$  NMR Spectrum of Compound **10** in  $\text{MeOH-}d_4$

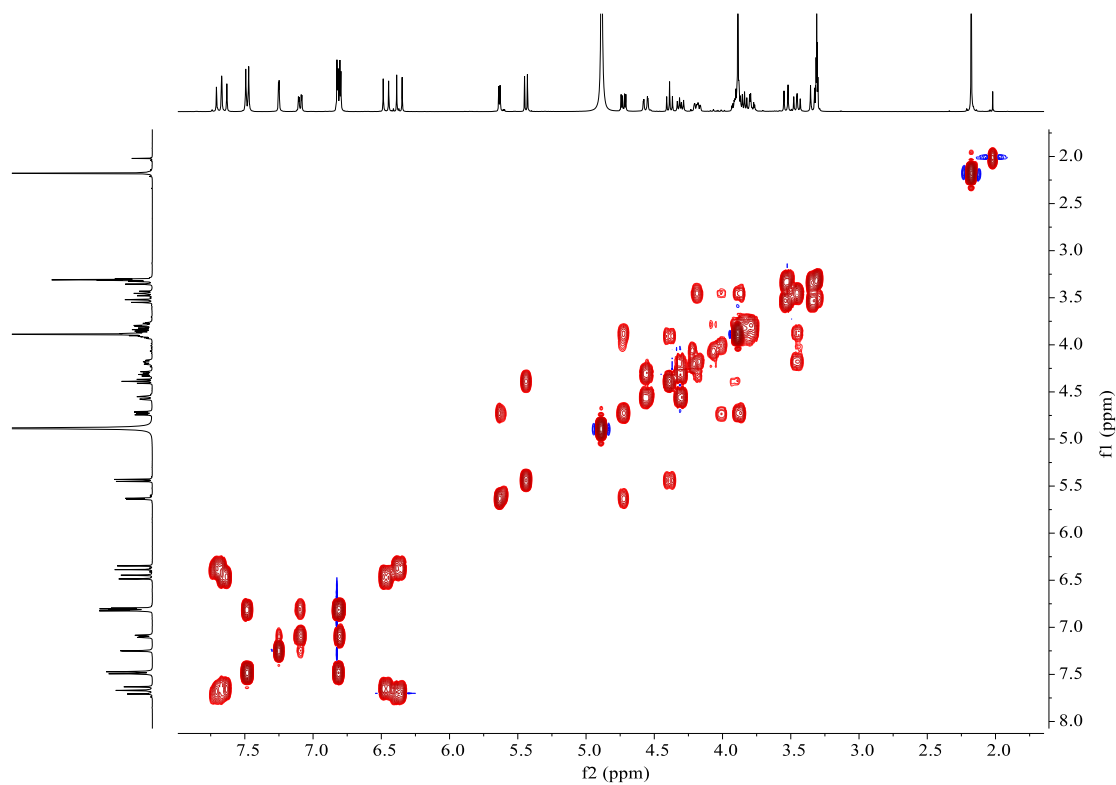

**Figure S88.**  $^1\text{H}$ - $^1\text{H}$  COSY Spectrum of Compound **10** in  $\text{MeOH-}d_4$

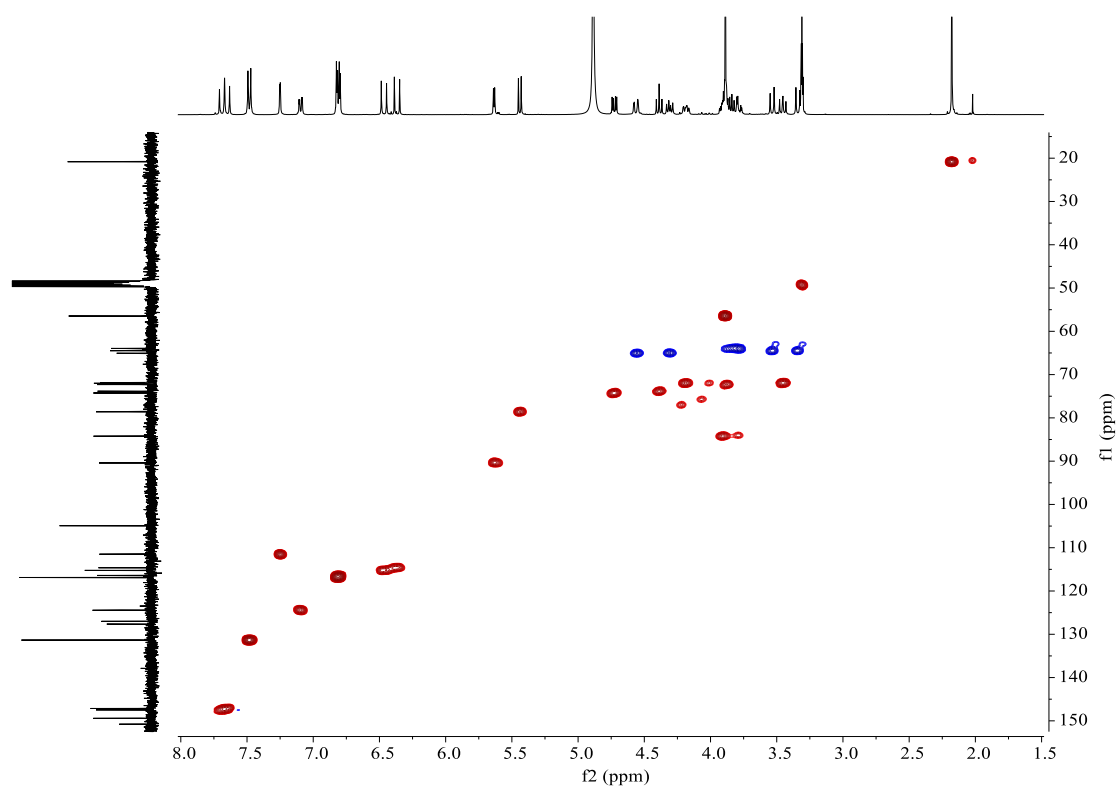

**Figure S89.** HSQC Spectrum of Compound **10** in MeOH- $d_4$

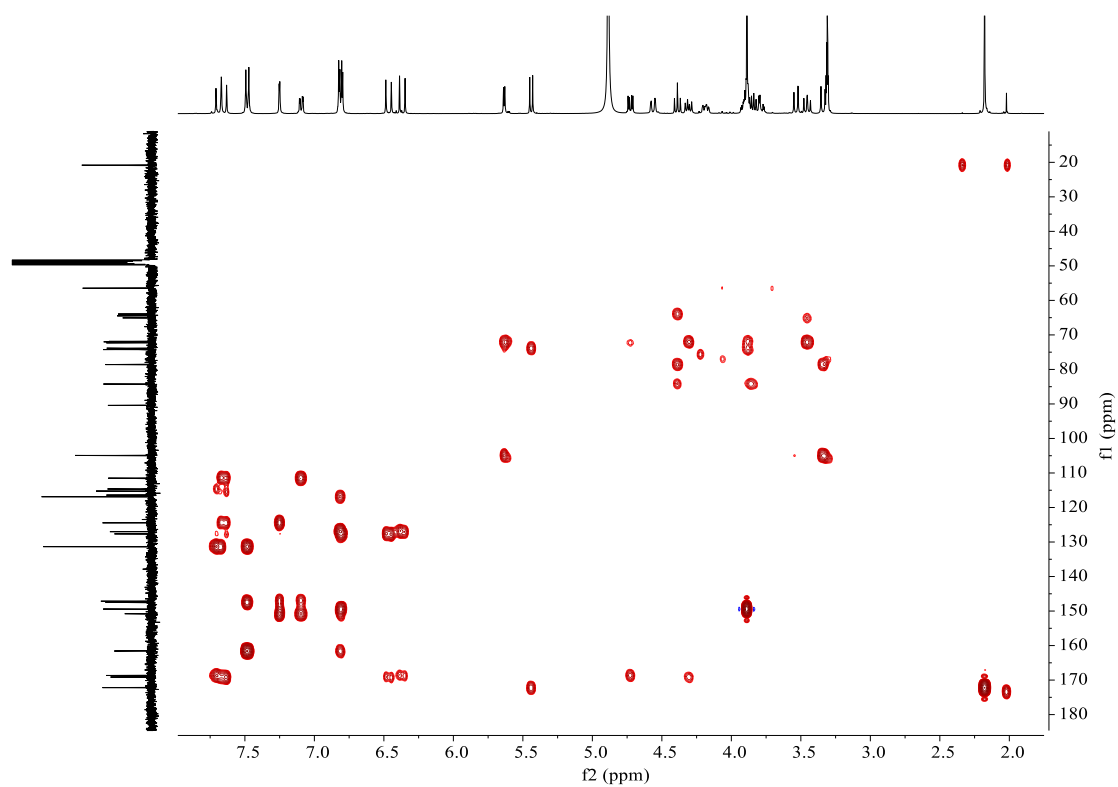

**Figure S90.** HMBC Spectrum of Compound **10** in MeOH- $d_4$

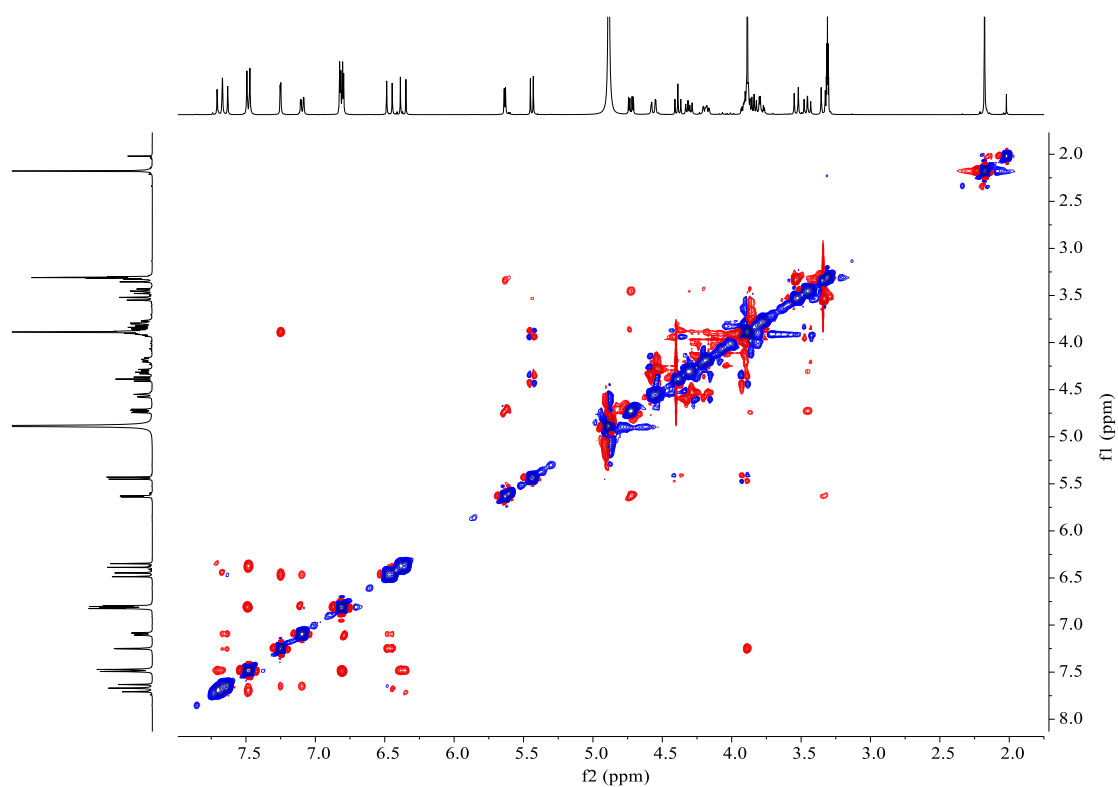

**Figure S91.** NOESY Spectrum of Compound **10** in MeOH- $d_4$

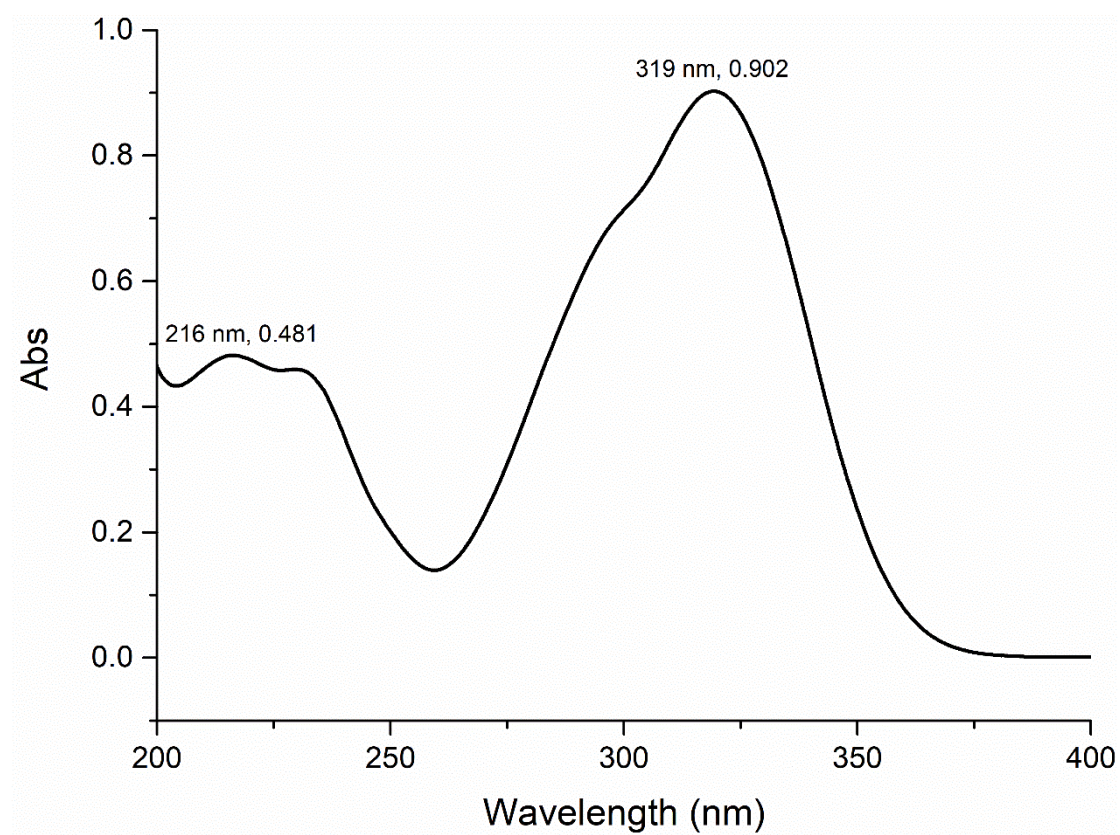

**Figure S92.** UV Spectrum of Compound **11**

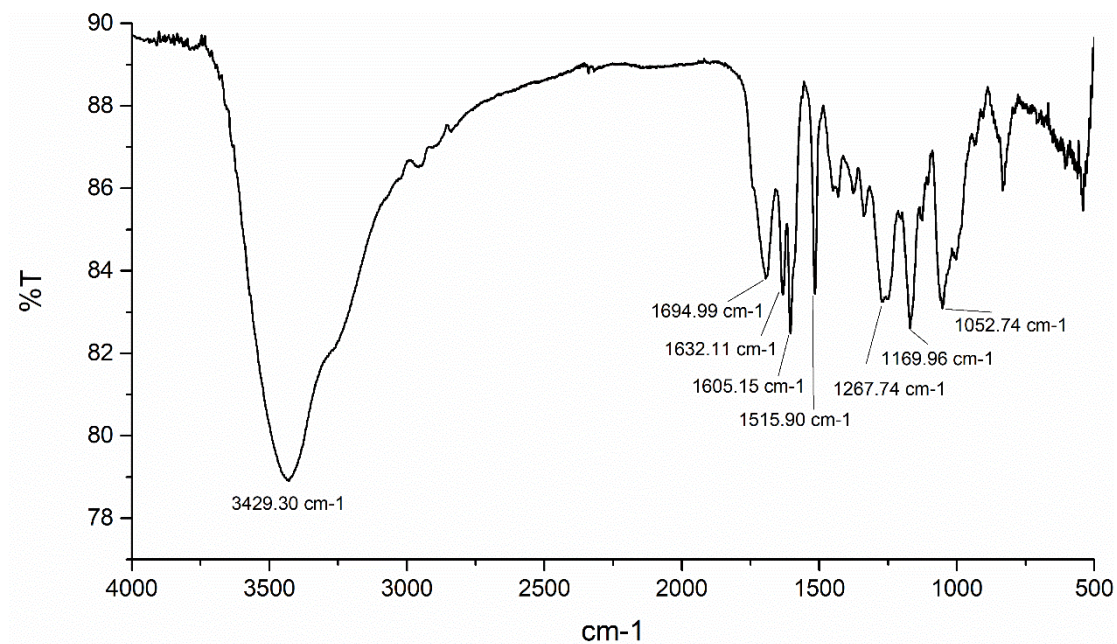

**Figure S93.** IR (KBr disc) Spectrum of Compound **11**

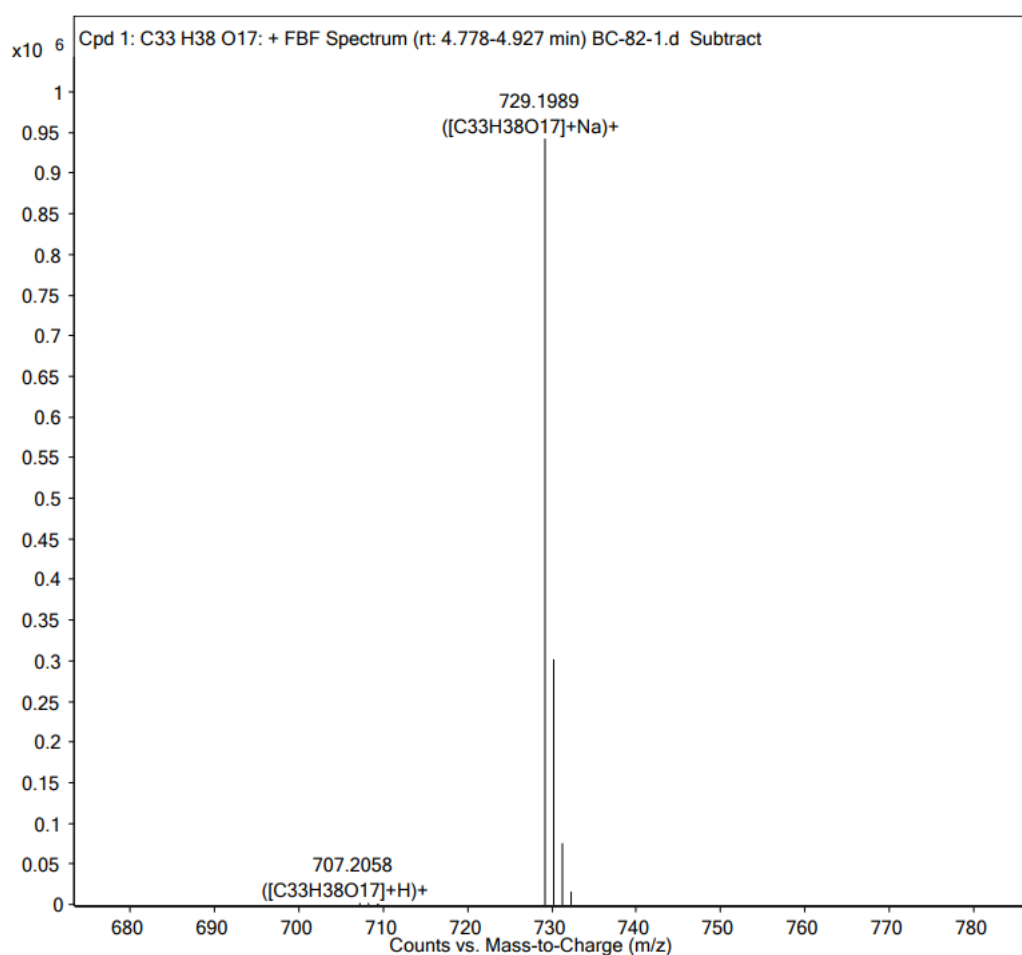

**Figure S94.** (+ ) HRESIMS Spectrum of Compound **11**



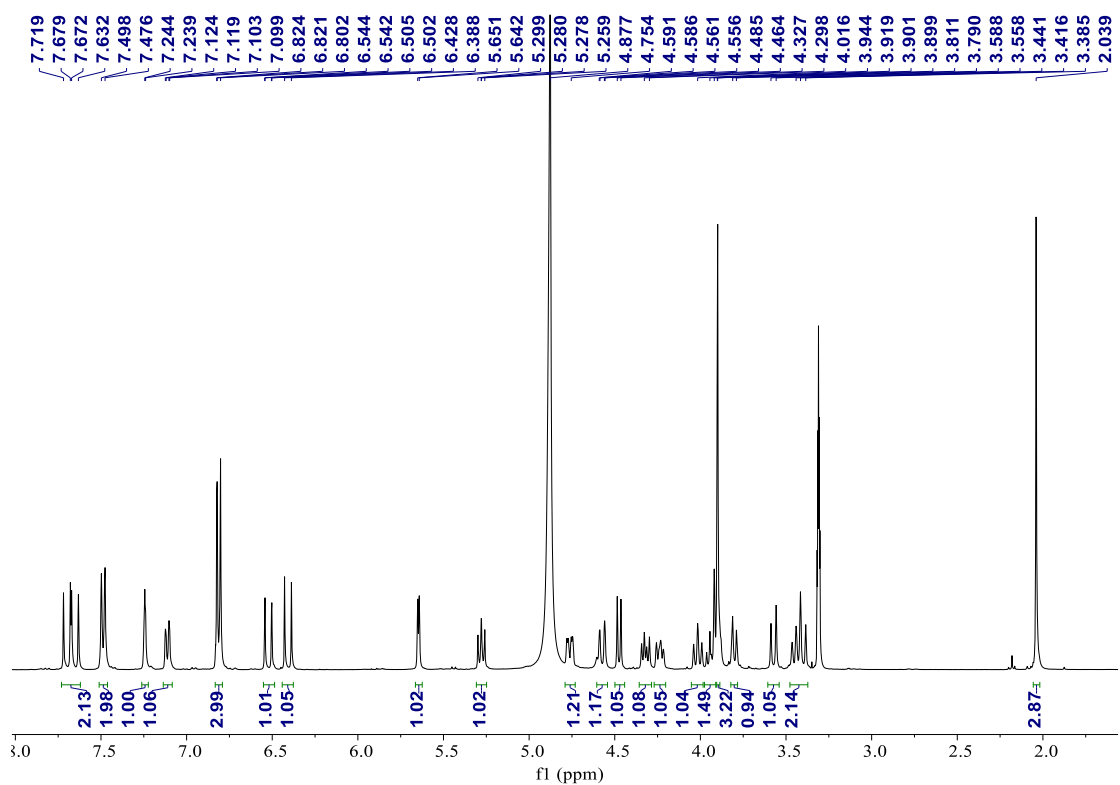

**Figure S95.  $^1\text{H}$  NMR Spectrum of Compound **11** in  $\text{MeOH-}d_4$**

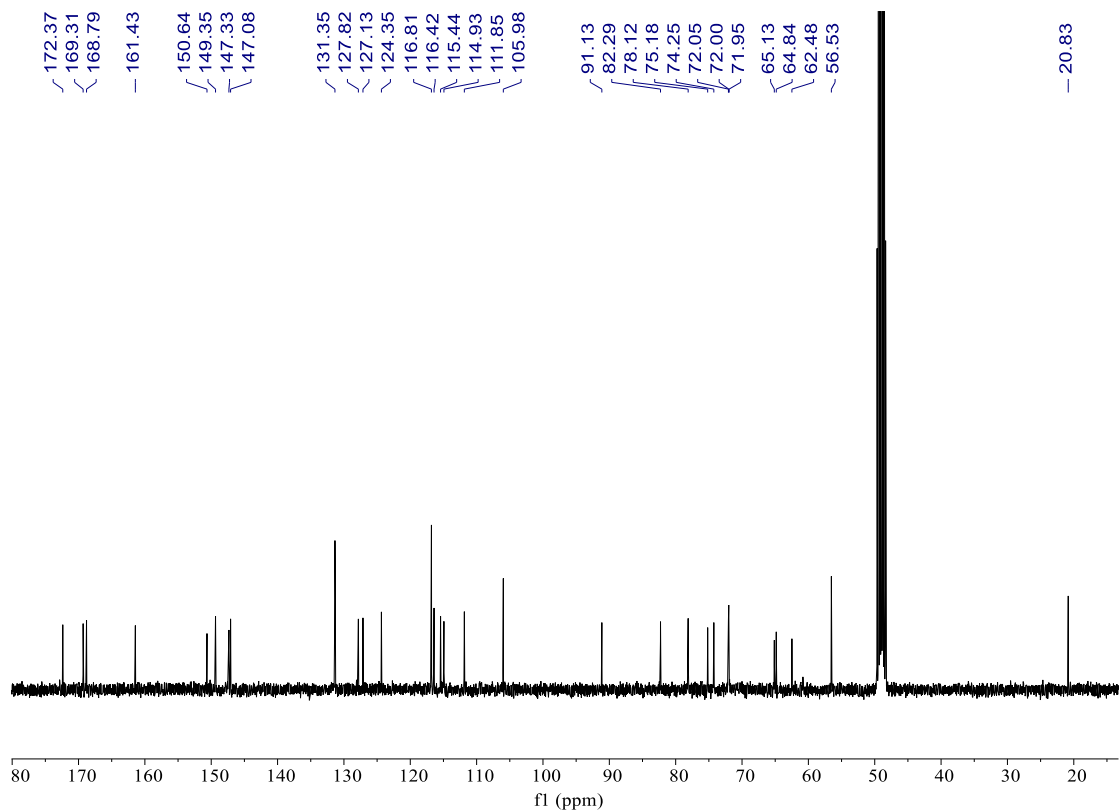

**Figure S96.  $^{13}\text{C}$  NMR Spectrum of Compound **11** in  $\text{MeOH-}d_4$**

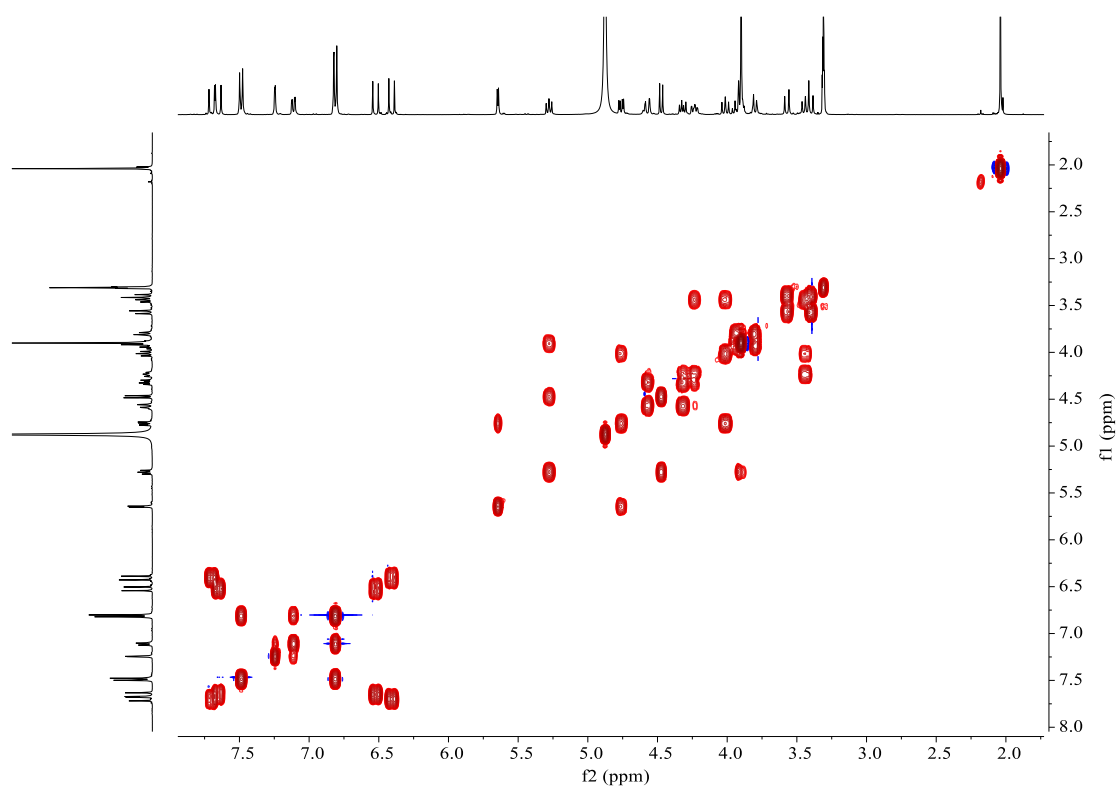

**Figure S97.**  $^1\text{H}$ – $^1\text{H}$  COSY Spectrum of Compound **11** in  $\text{MeOH-}d_4$

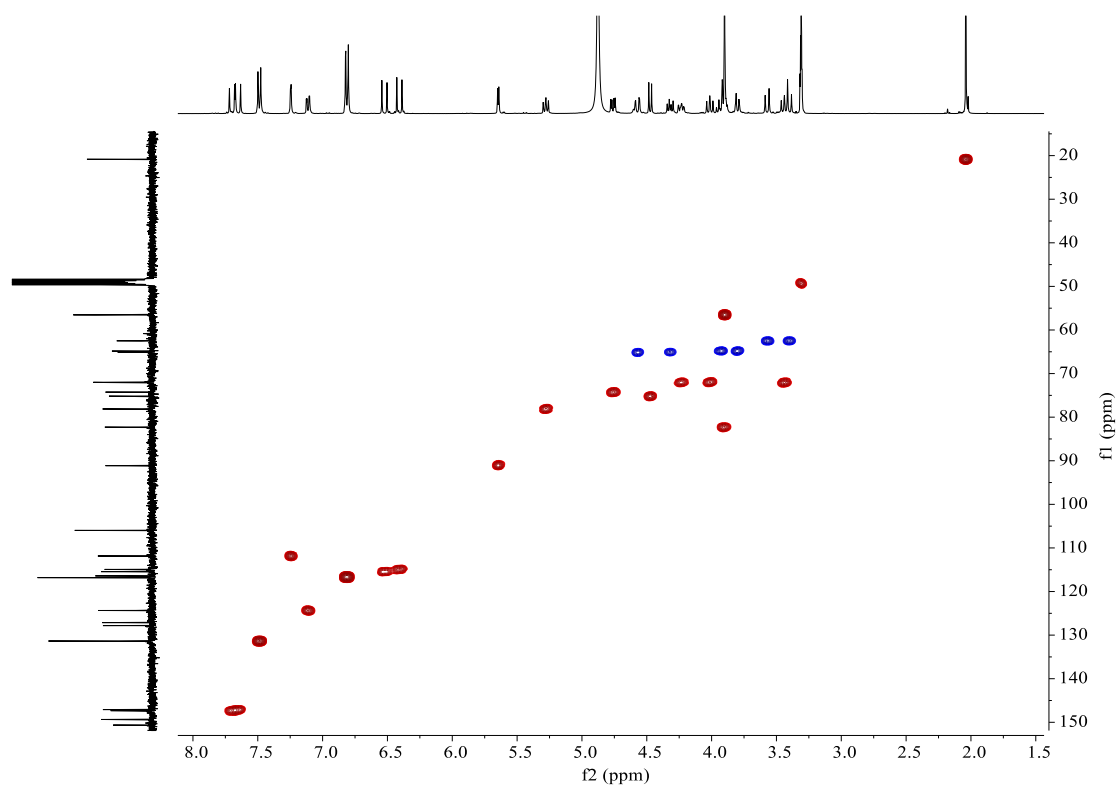

**Figure S98.** HSQC Spectrum of Compound **11** in  $\text{MeOH-}d_4$



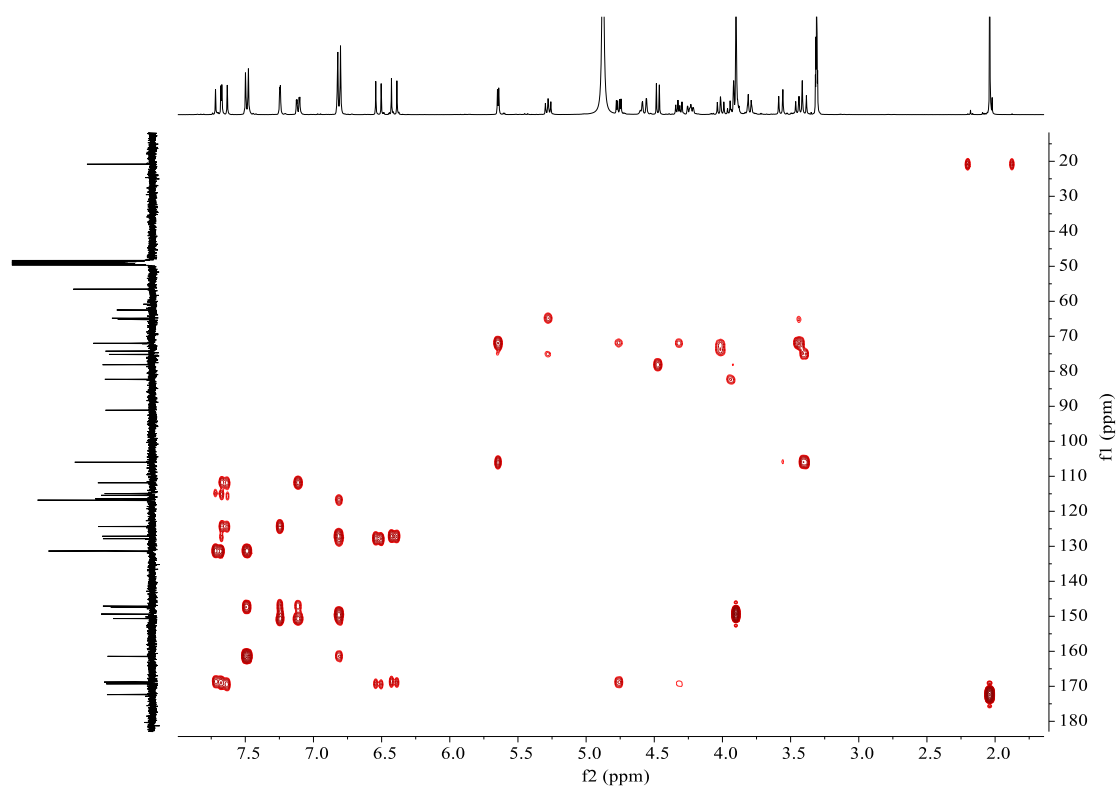

**Figure S99.** HMBC Spectrum of Compound **11** in  $\text{MeOH-}d_4$

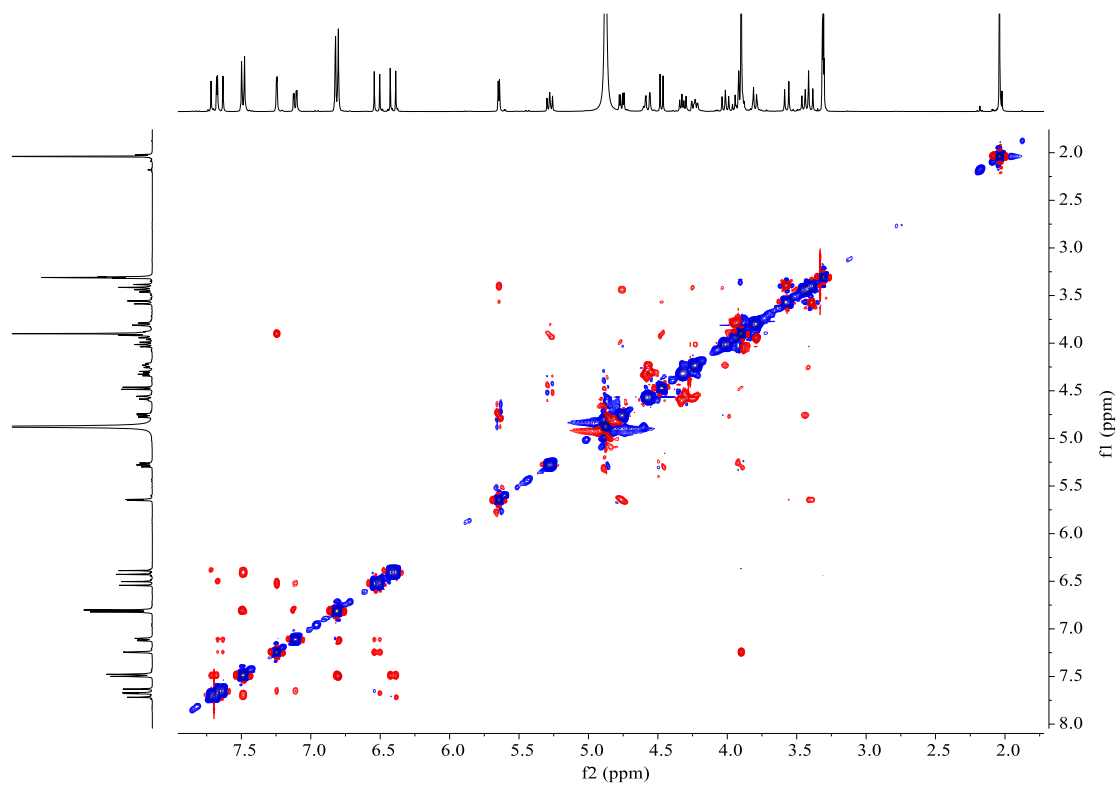

**Figure S100.** NOESY Spectrum of Compound **11** in  $\text{MeOH-}d_4$

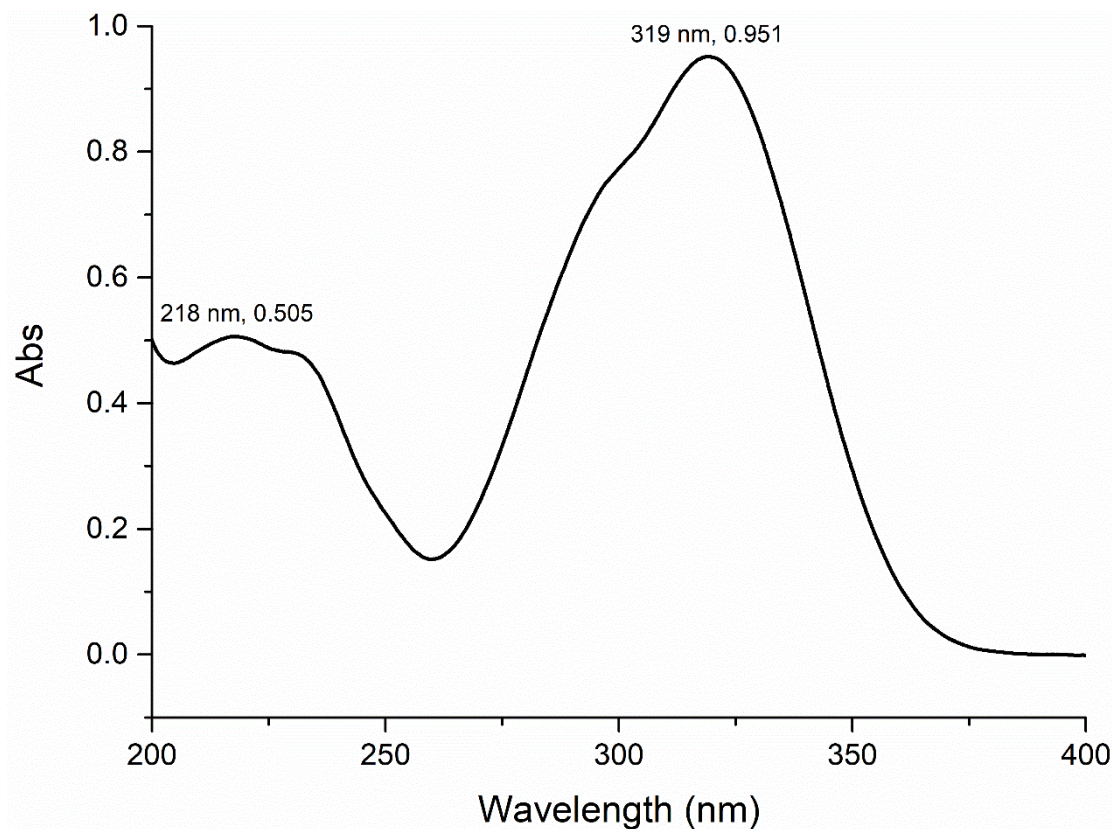

**Figure S101.** UV Spectrum of Compound **12**

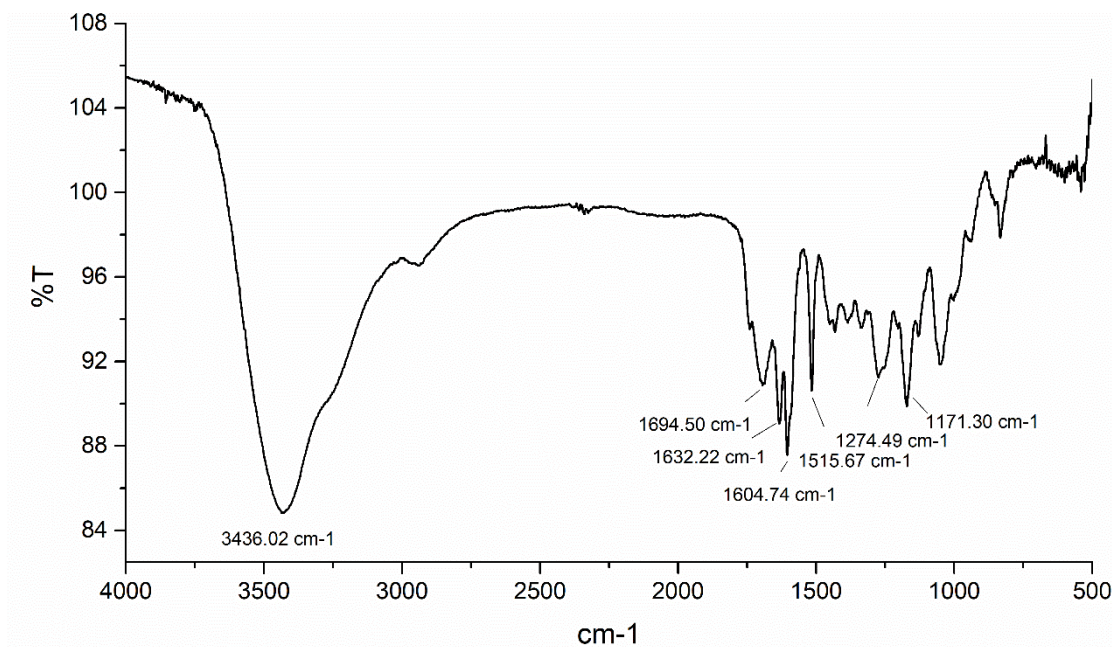

**Figure S102.** IR (KBr disc) Spectrum of Compound **12**

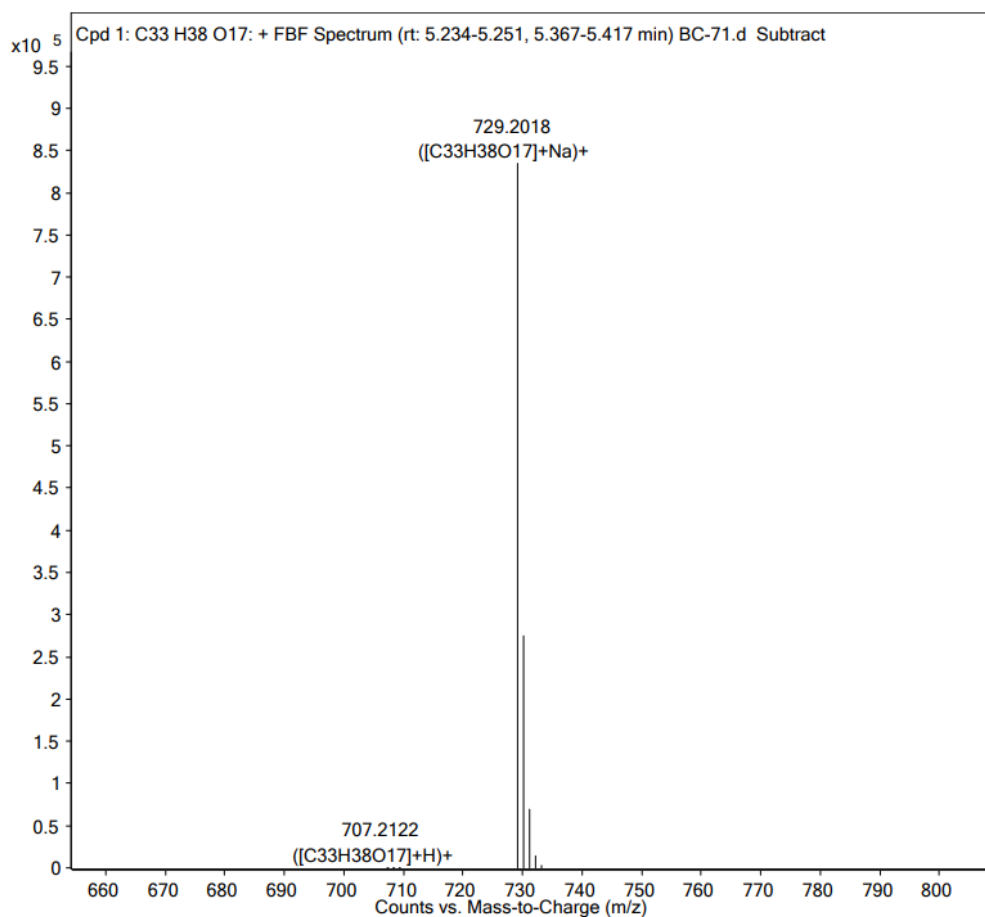

**Figure S103.** (+) HRESIMS Spectrum of Compound **12**

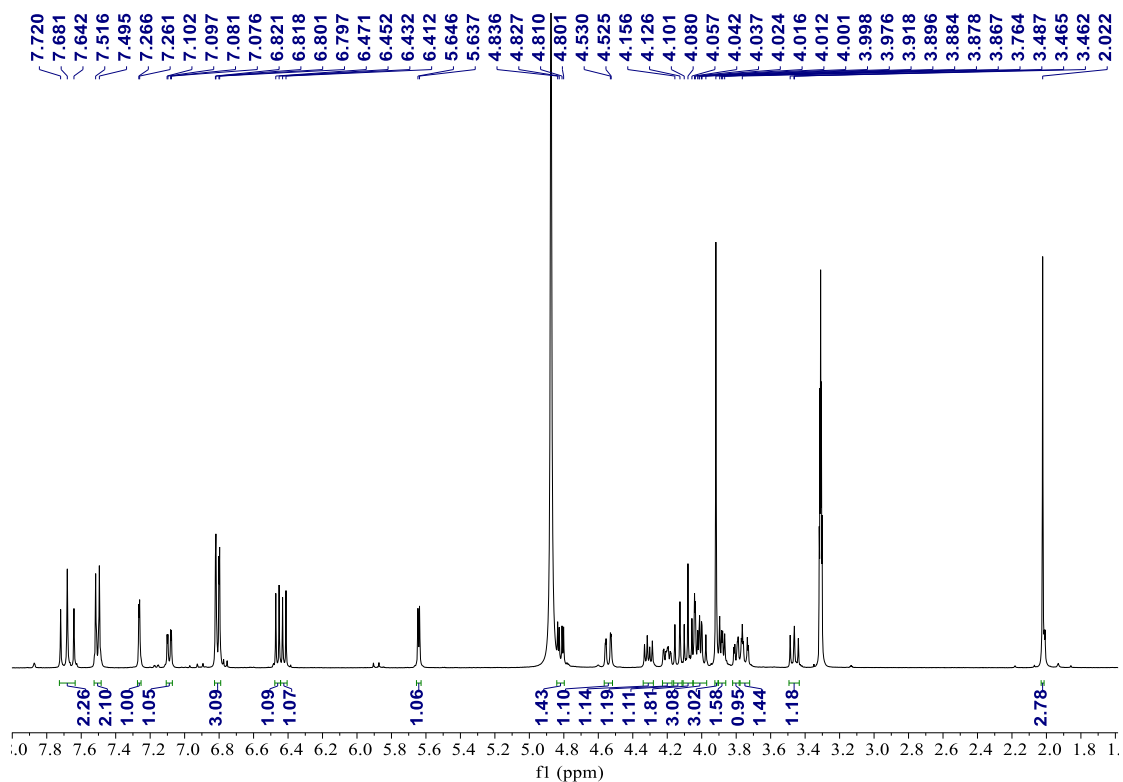

**Figure S104.**  $^1\text{H}$  NMR Spectrum of Compound **12** in  $\text{MeOH-}d_4$

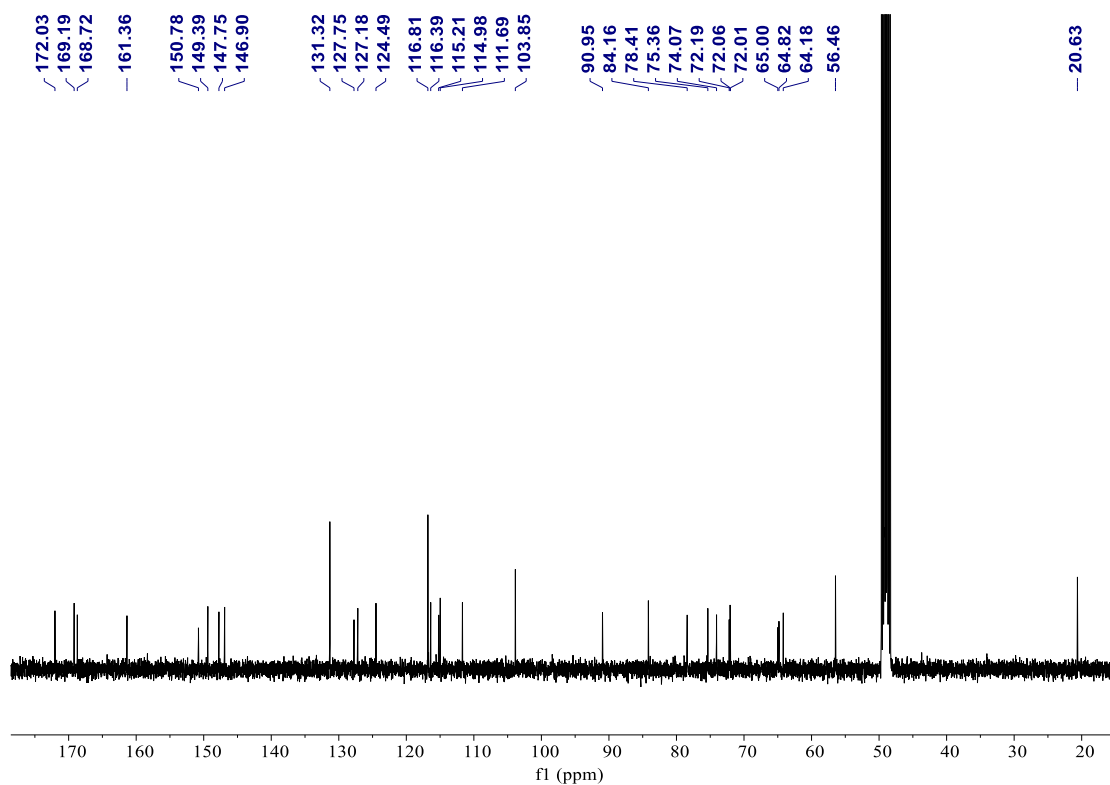

**Figure S105.**  $^{13}\text{C}$  NMR Spectrum of Compound **12** in  $\text{MeOH-}d_4$

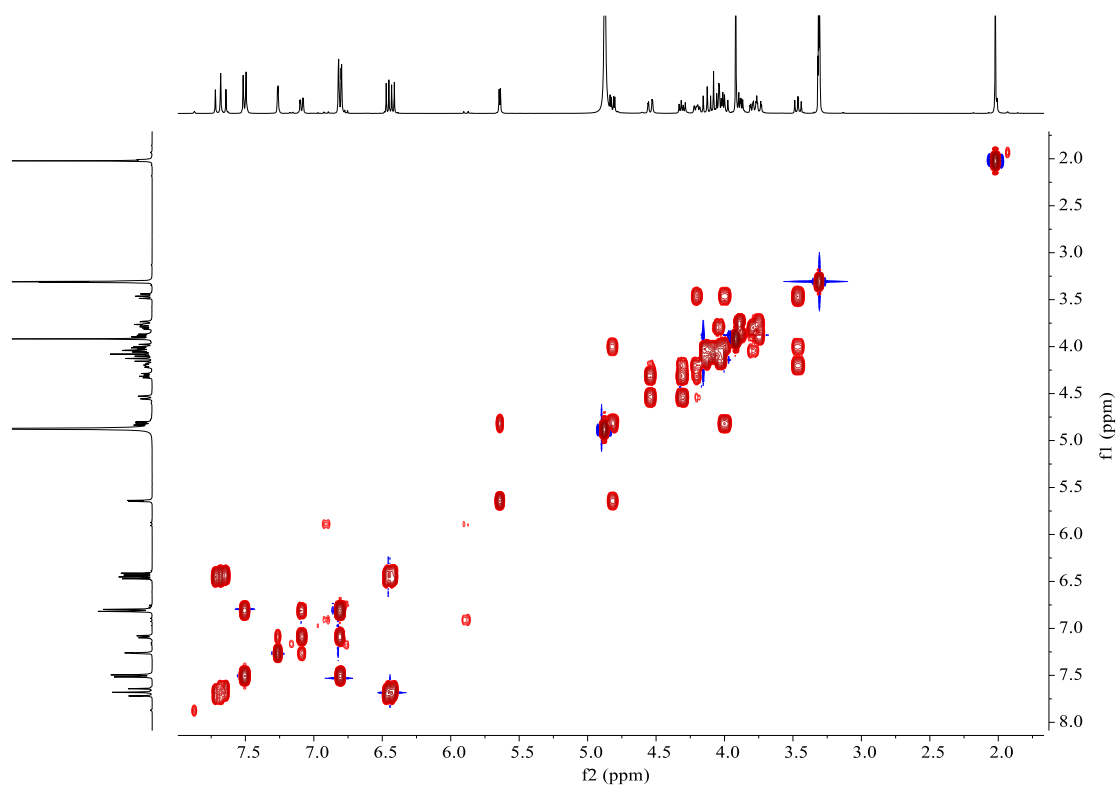

**Figure S106.**  $^1\text{H}$ – $^1\text{H}$  COSY Spectrum of Compound **12** in  $\text{MeOH-}d_4$

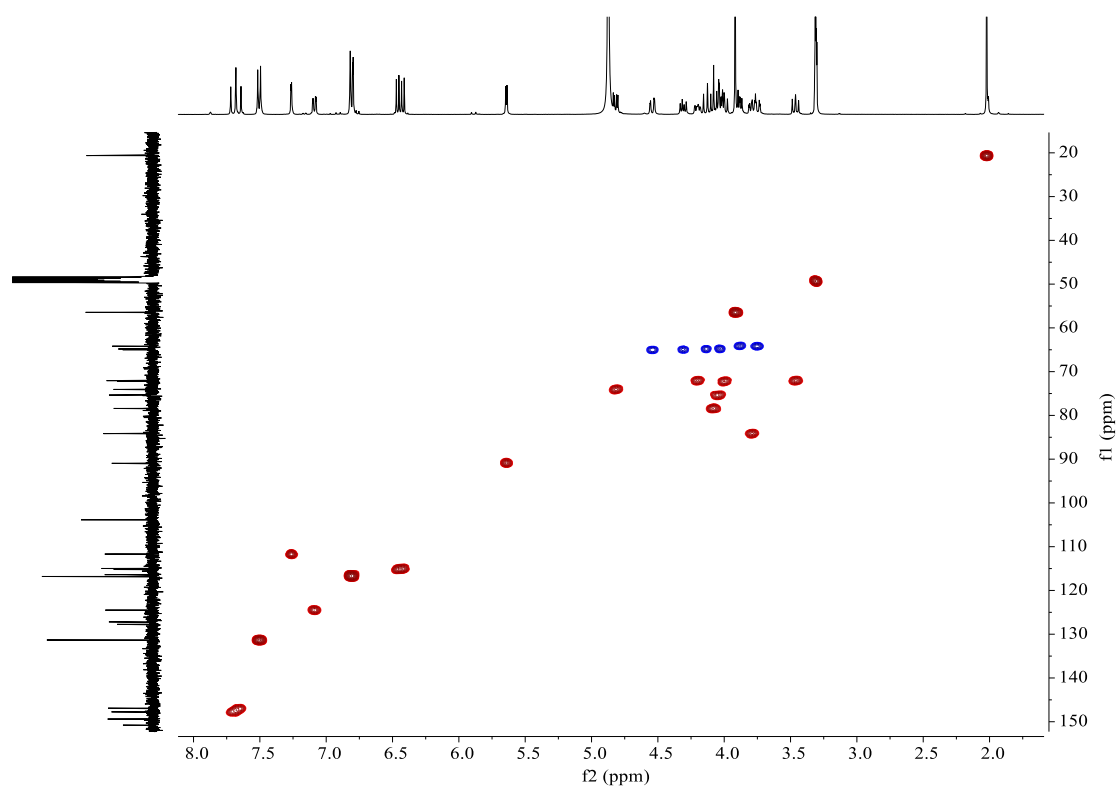

**Figure S107.** HSQC Spectrum of Compound **12** in MeOH- $d_4$

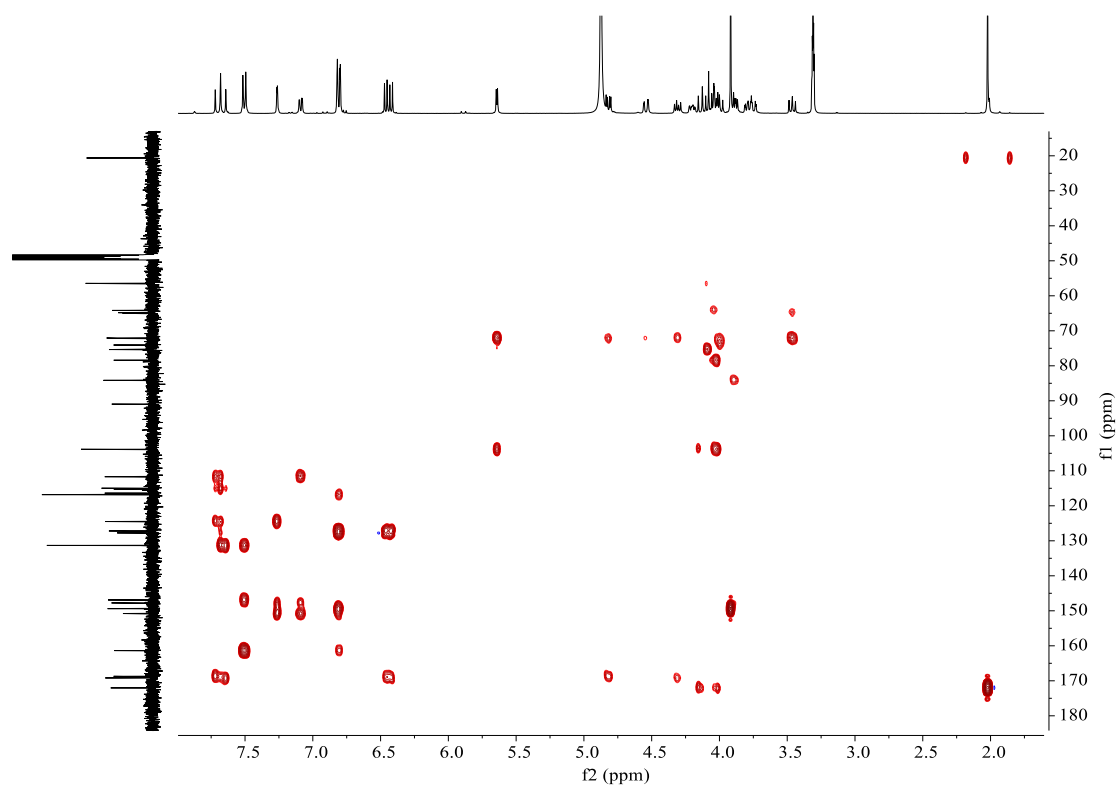

**Figure S108.** HMBC Spectrum of Compound **12** in MeOH- $d_4$

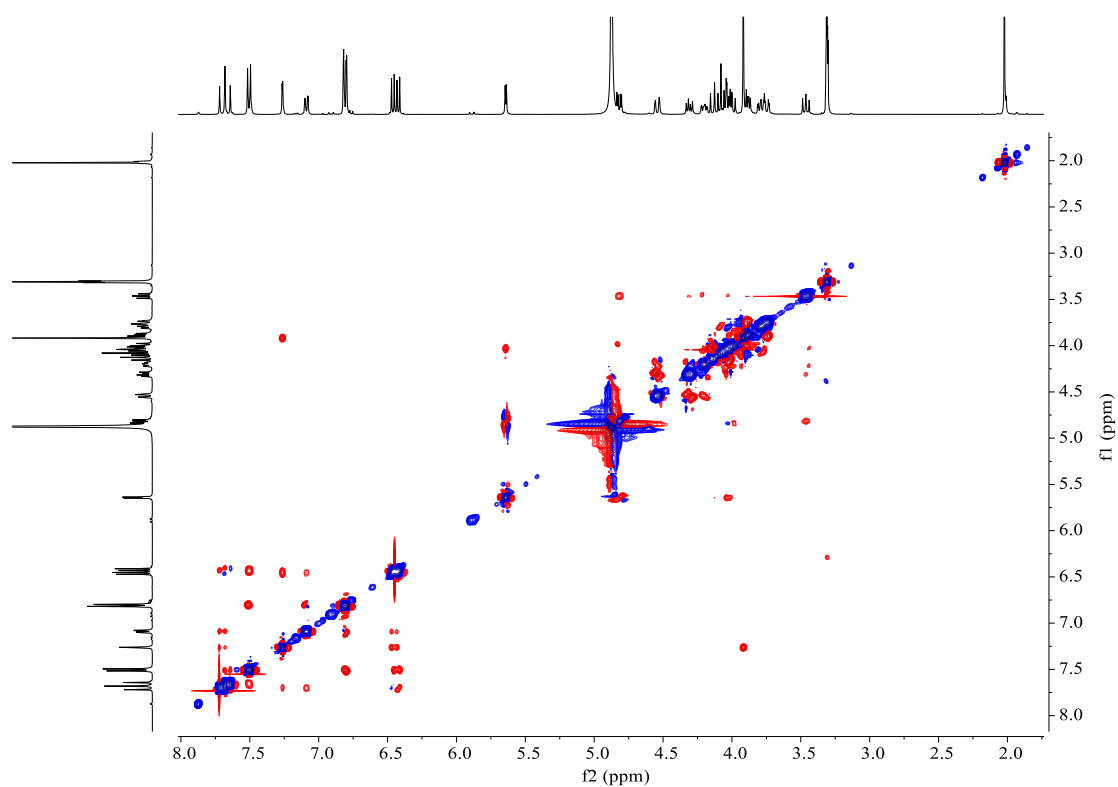

**Figure S109.** NOESY Spectrum of Compound **12** in MeOH- $d_4$

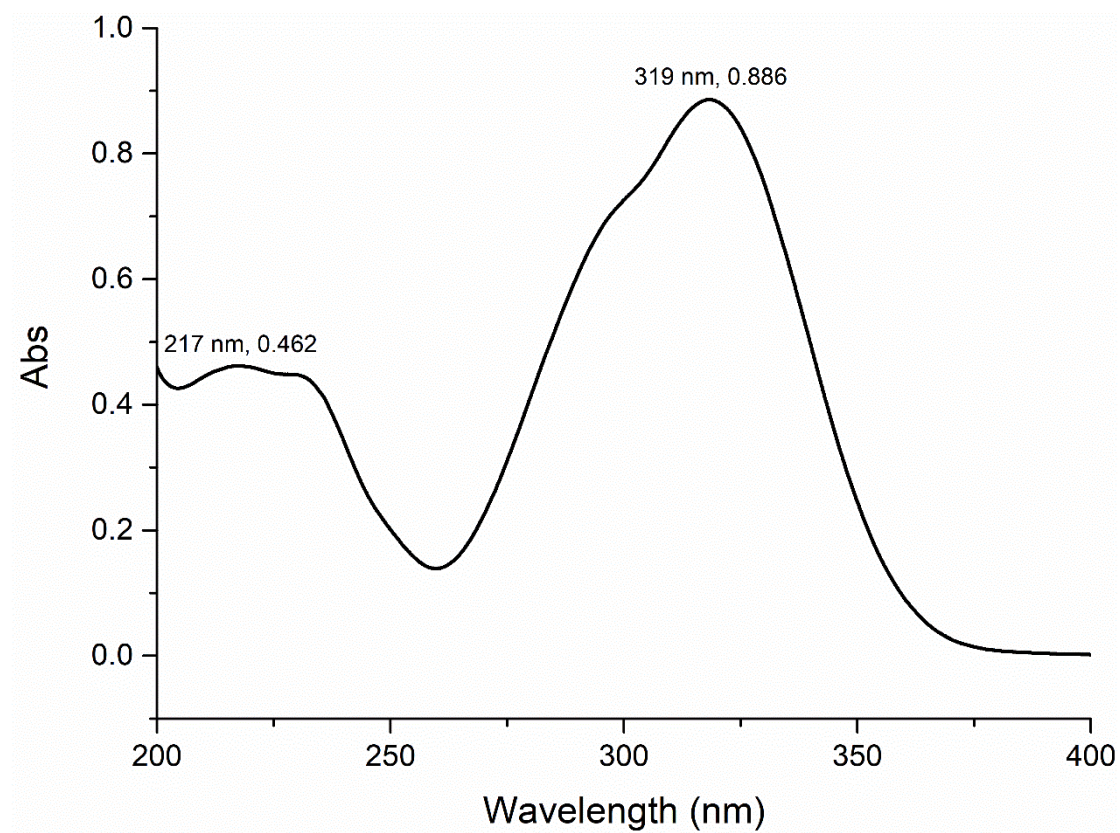

**Figure S110.** UV Spectrum of Compound **13**

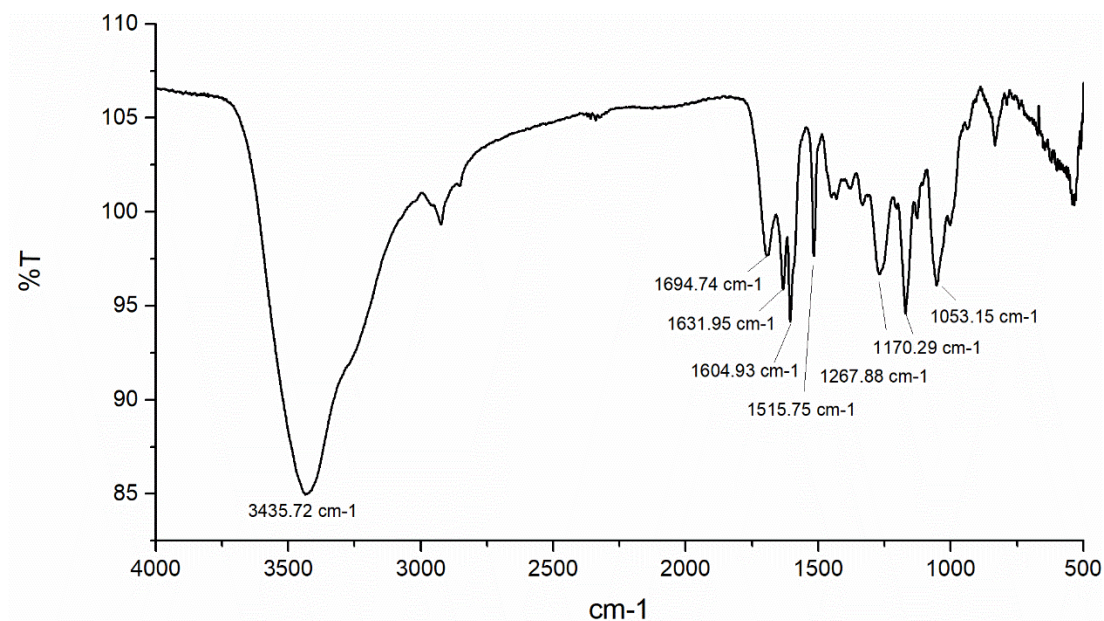

**Figure S111.** IR (KBr disc) Spectrum of Compound **13**

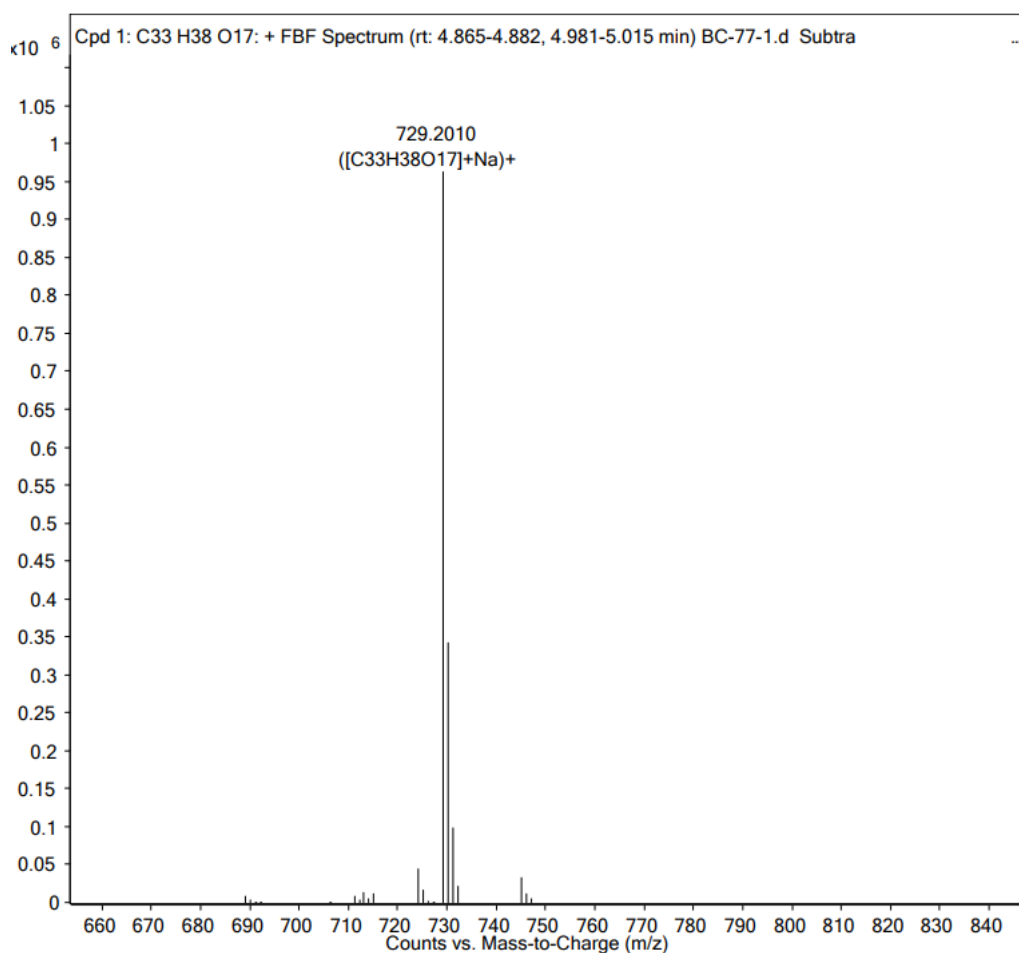

**Figure S112.** (+) HRESIMS Spectrum of Compound **13**



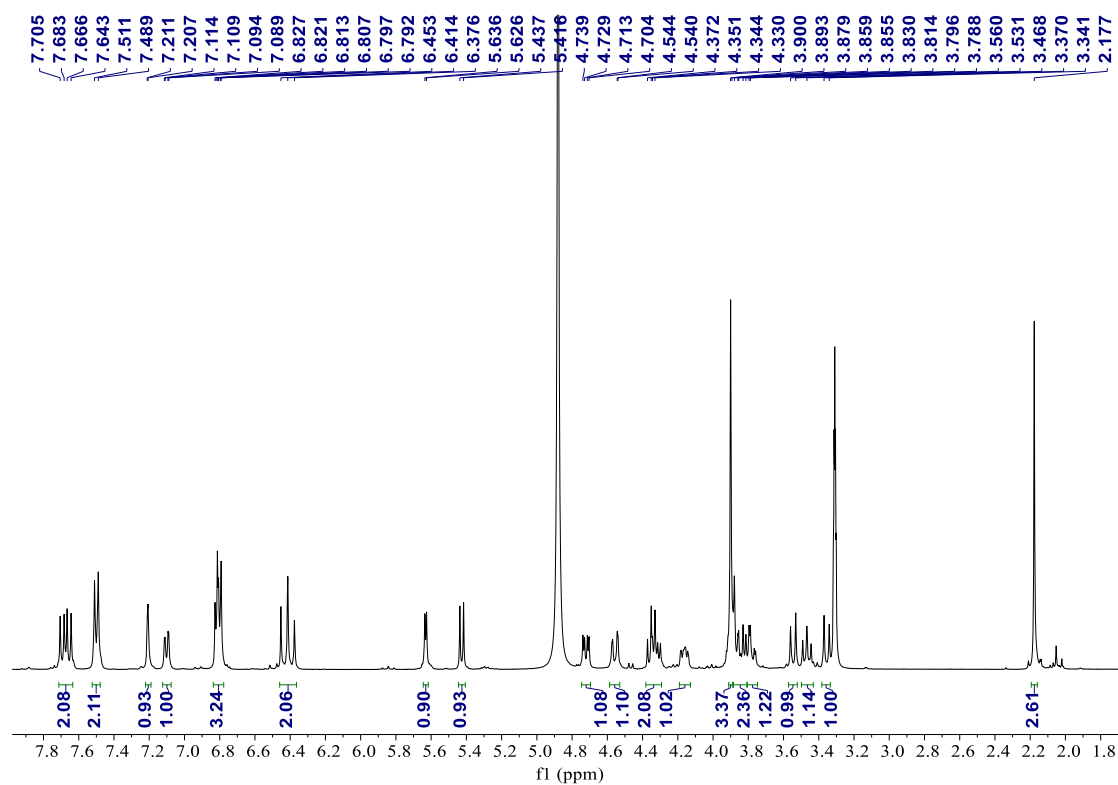

**Figure S113.  $^1\text{H}$  NMR Spectrum of Compound 13 in  $\text{MeOH-}d_4$**

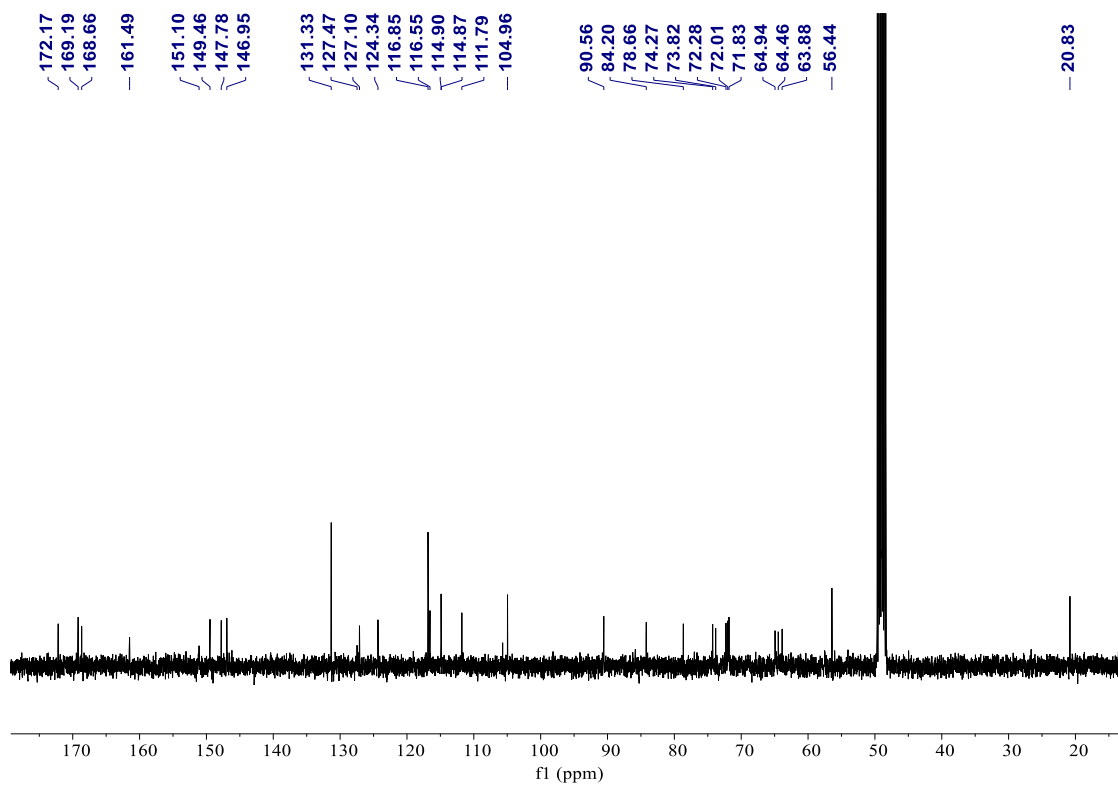

**Figure S114.  $^{13}\text{C}$  NMR Spectrum of Compound 13 in  $\text{MeOH-}d_4$**



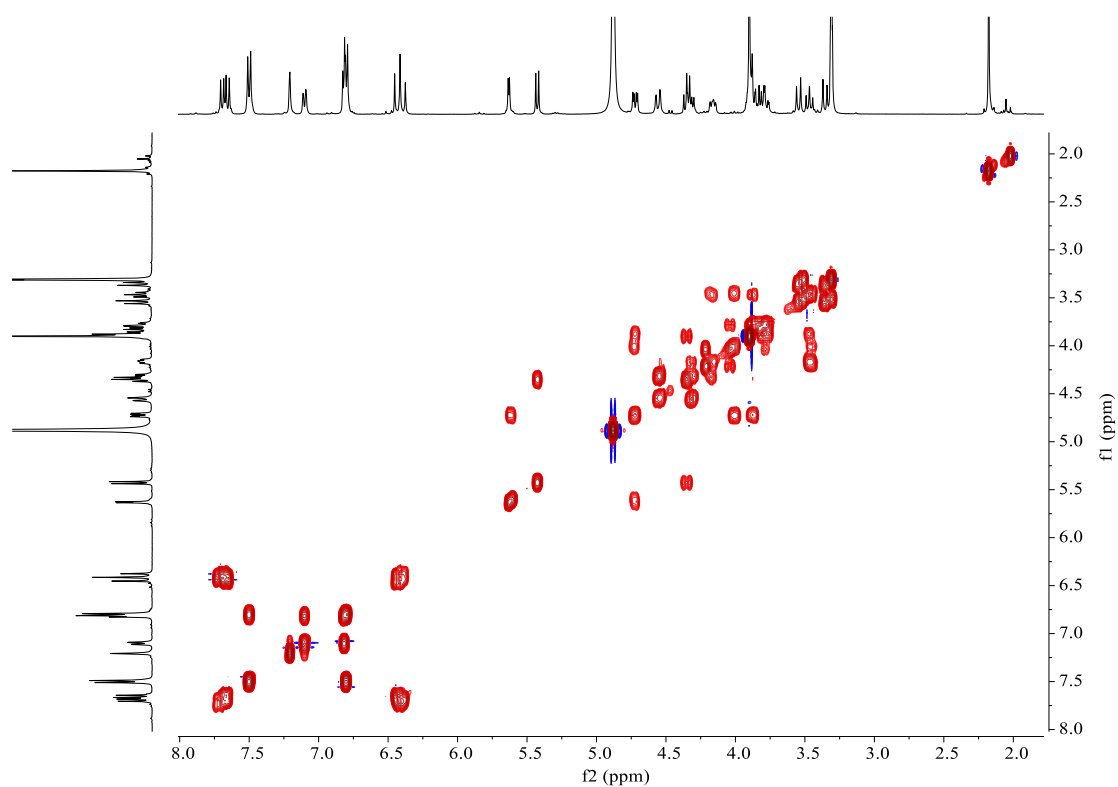

**Figure S115.**  $^1\text{H}$ - $^1\text{H}$  COSY Spectrum of Compound **13** in  $\text{MeOH-}d_4$

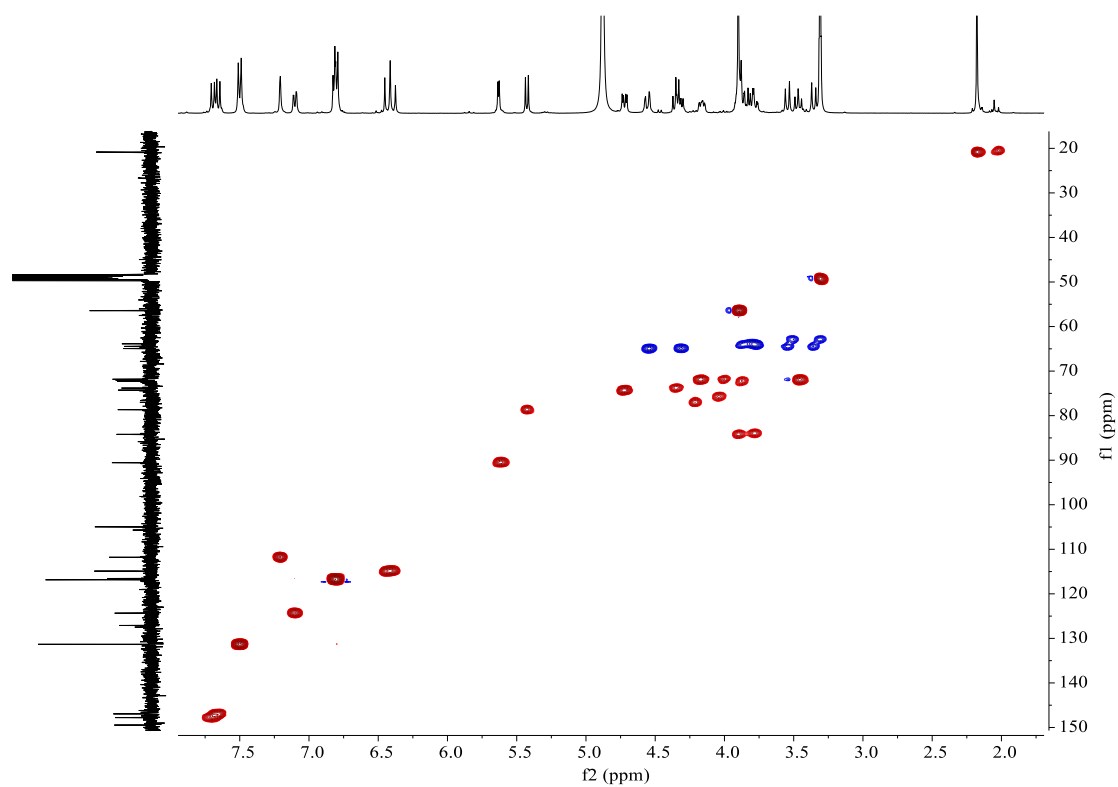

**Figure S116.** HSQC Spectrum of Compound **13** in  $\text{MeOH-}d_4$

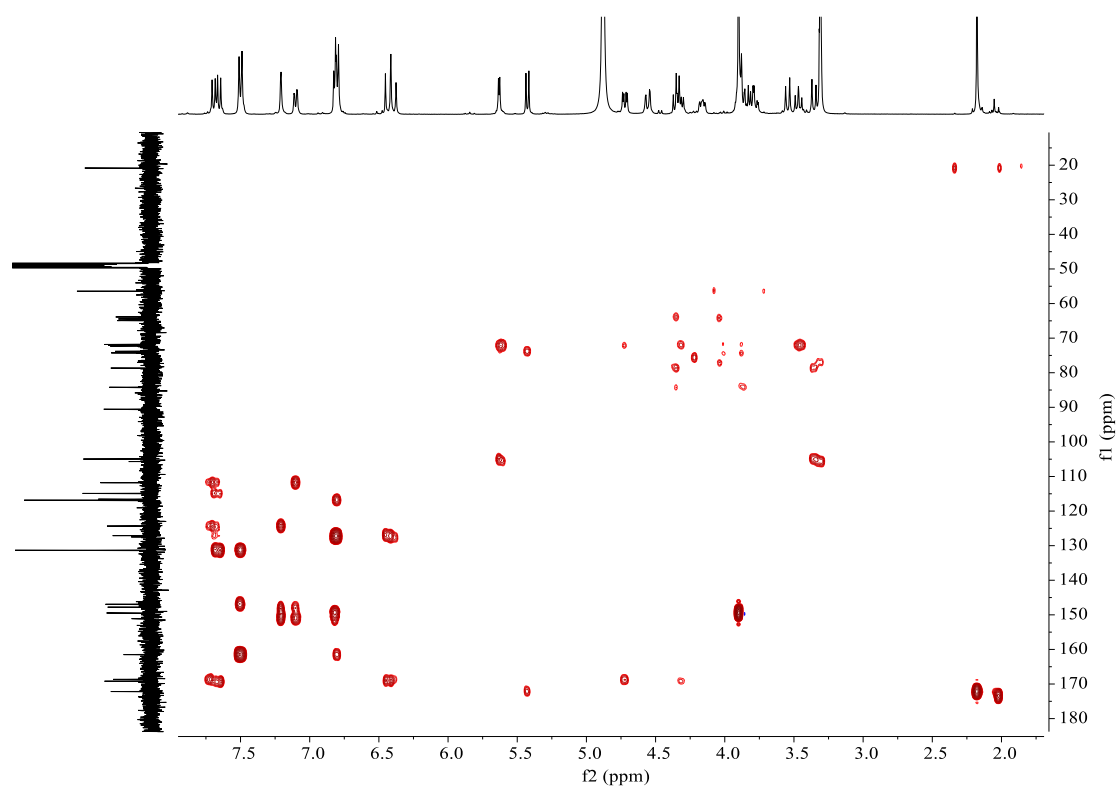

**Figure S117.** HMBC Spectrum of Compound **13** in MeOH- $d_4$

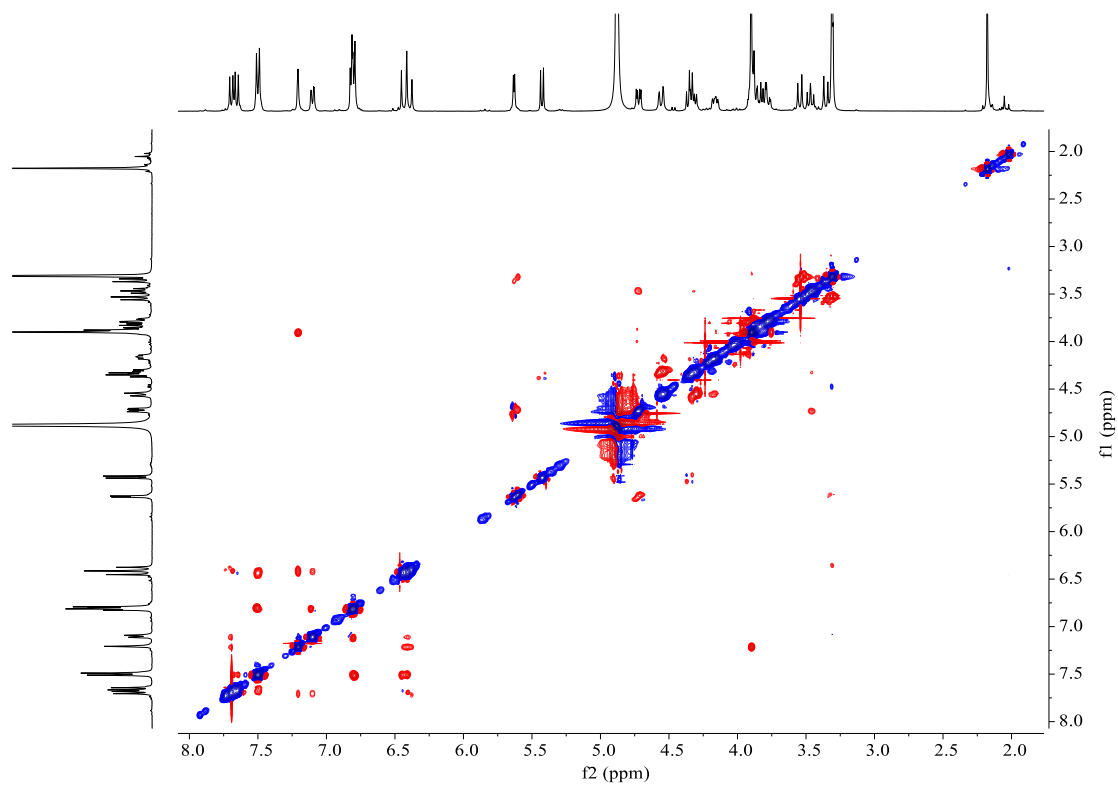

**Figure S118.** NOESY Spectrum of Compound **13** in MeOH- $d_4$

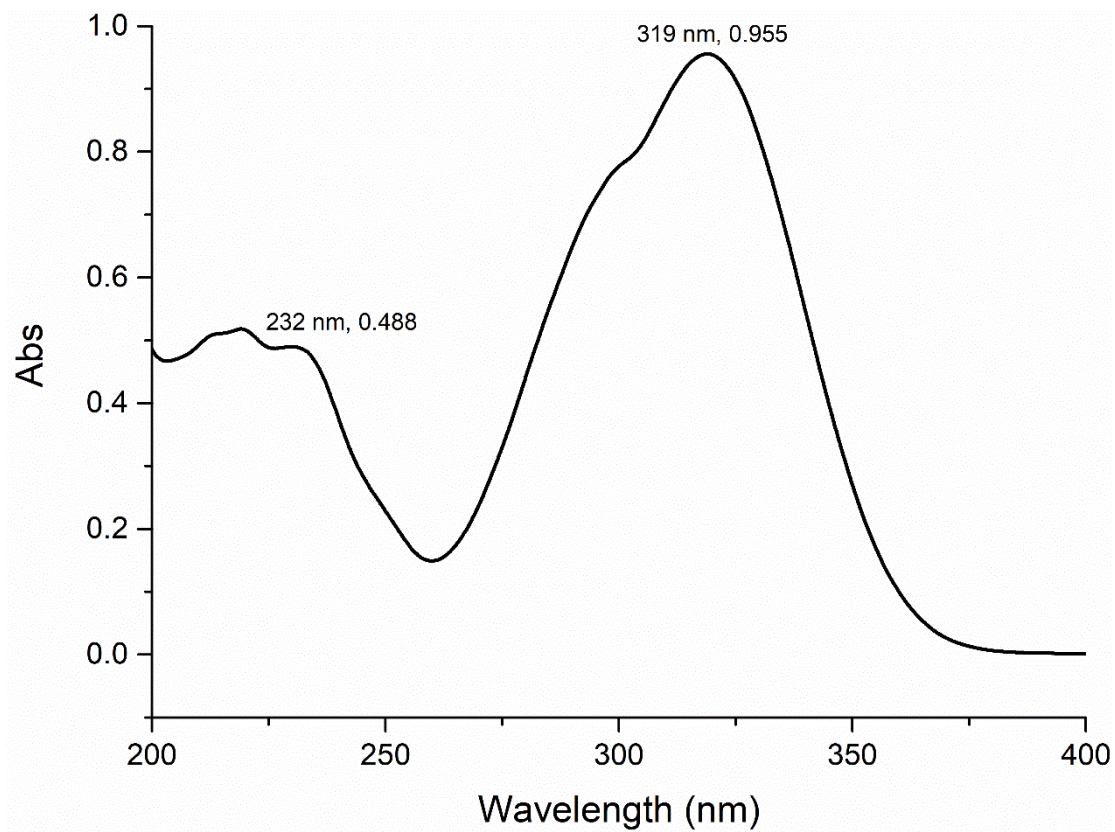

**Figure S119.** UV Spectrum of Compound **14**

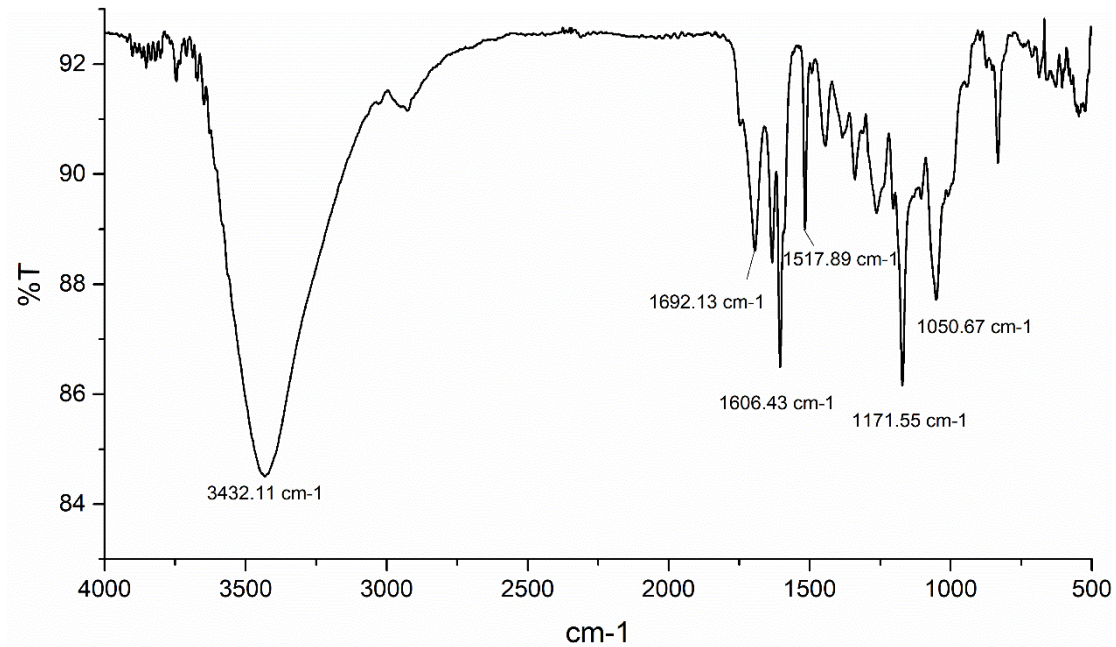

**Figure S120.** IR (KBr disc) Spectrum of Compound **14**

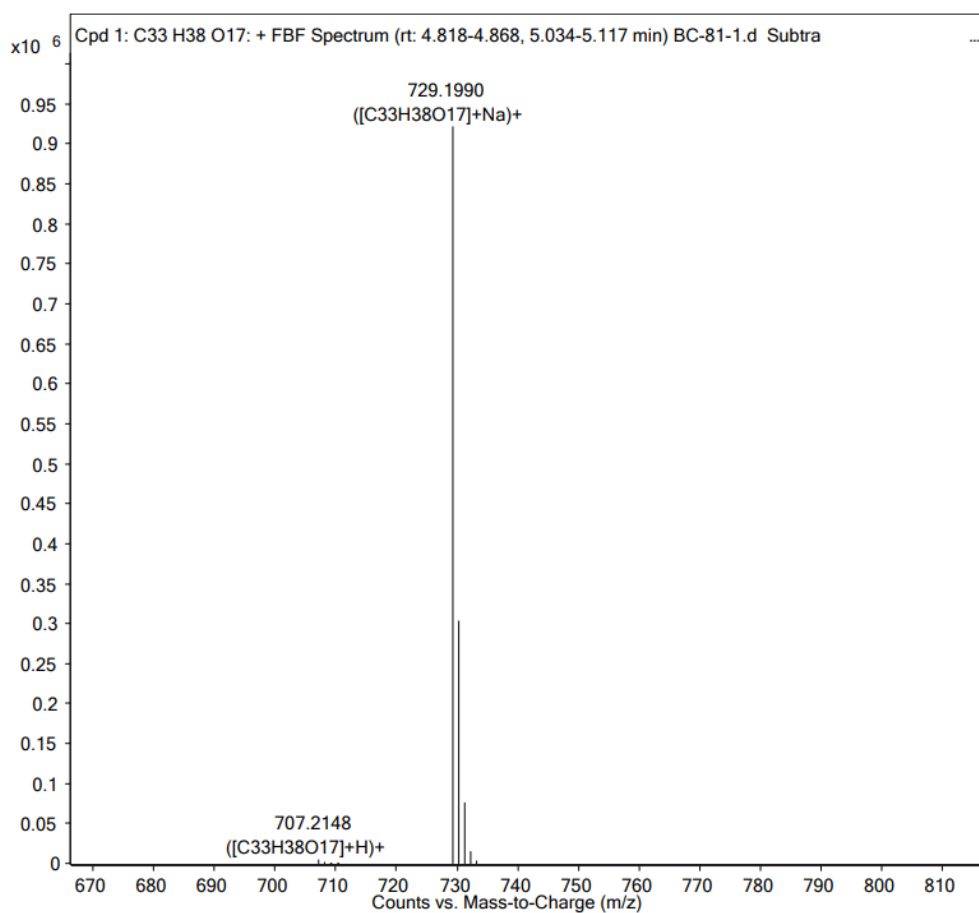

**Figure S121.** (+) HRESIMS Spectrum of Compound **14**

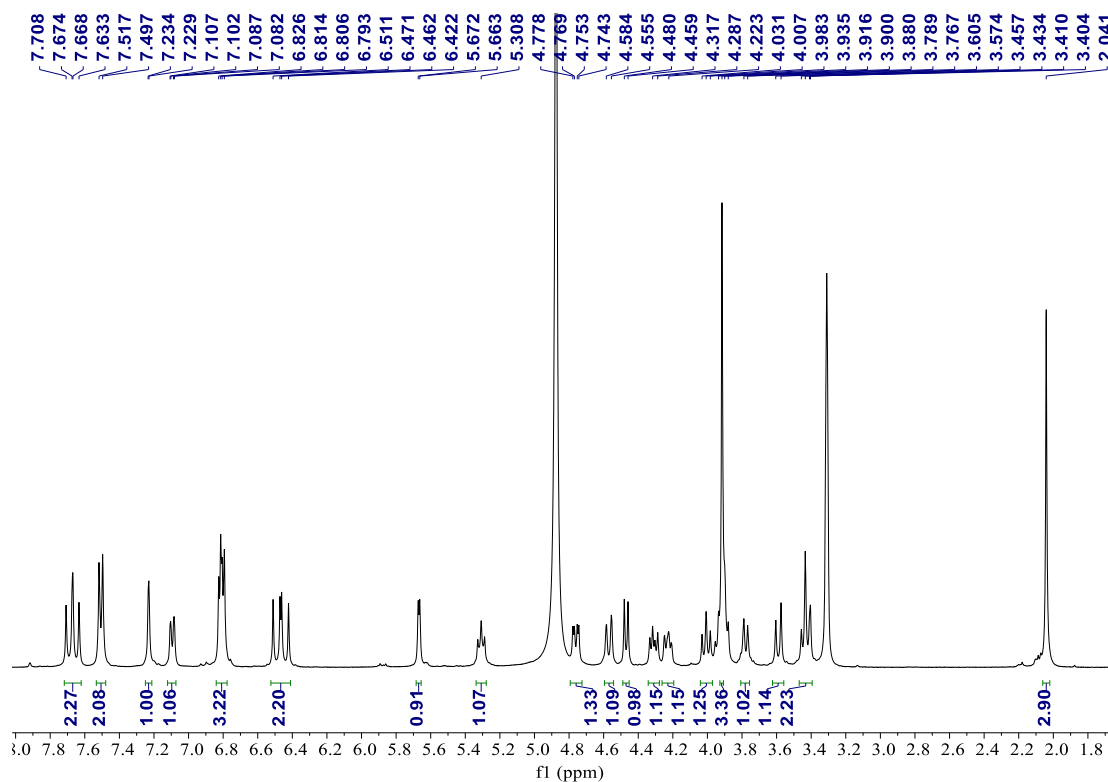

**Figure S122.** <sup>1</sup>H NMR Spectrum of Compound **14** in MeOH-*d*<sub>4</sub>

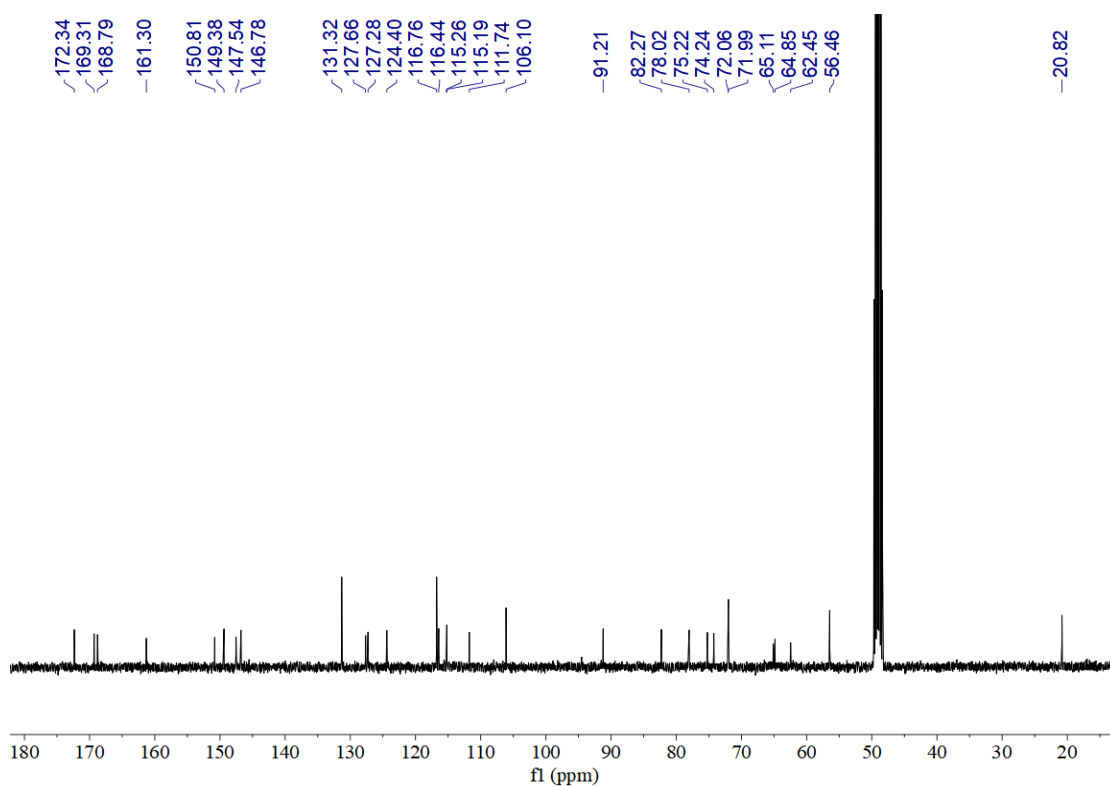

**Figure S123.**  $^{13}\text{C}$  NMR Spectrum of Compound **14** in  $\text{MeOH-}d_4$

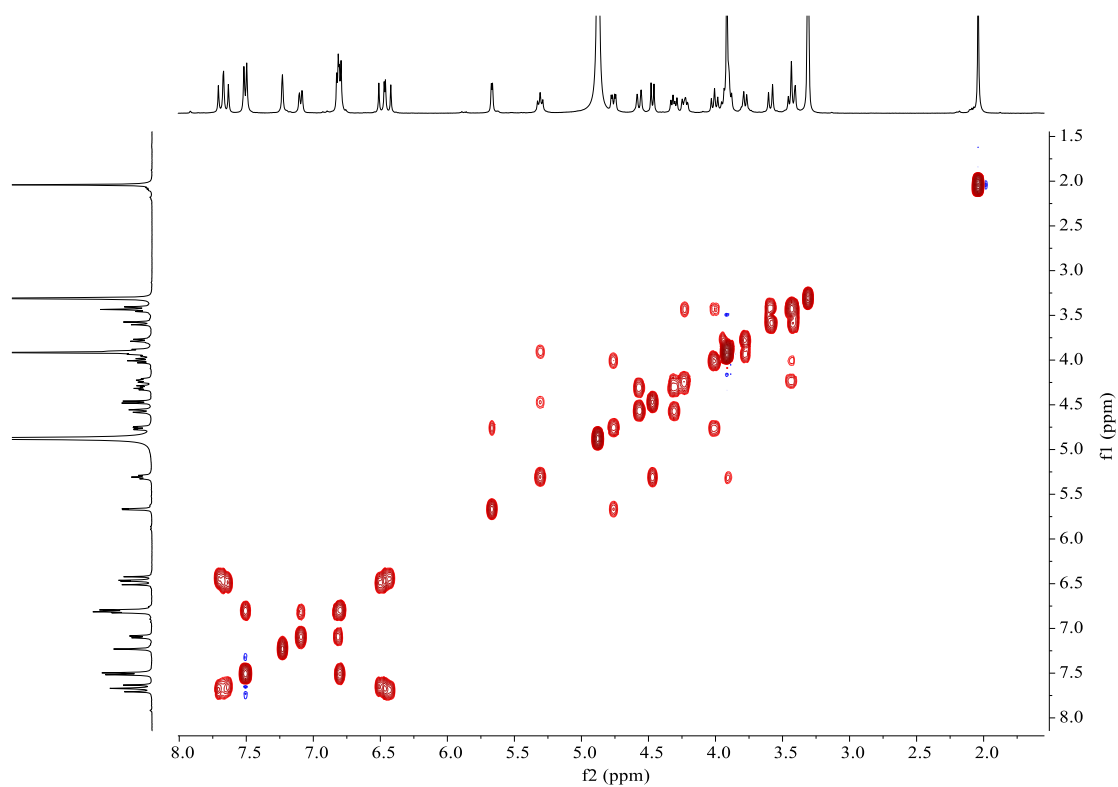

**Figure S124.**  $^1\text{H}$ - $^1\text{H}$  COSY Spectrum of Compound **14** in  $\text{MeOH-}d_4$

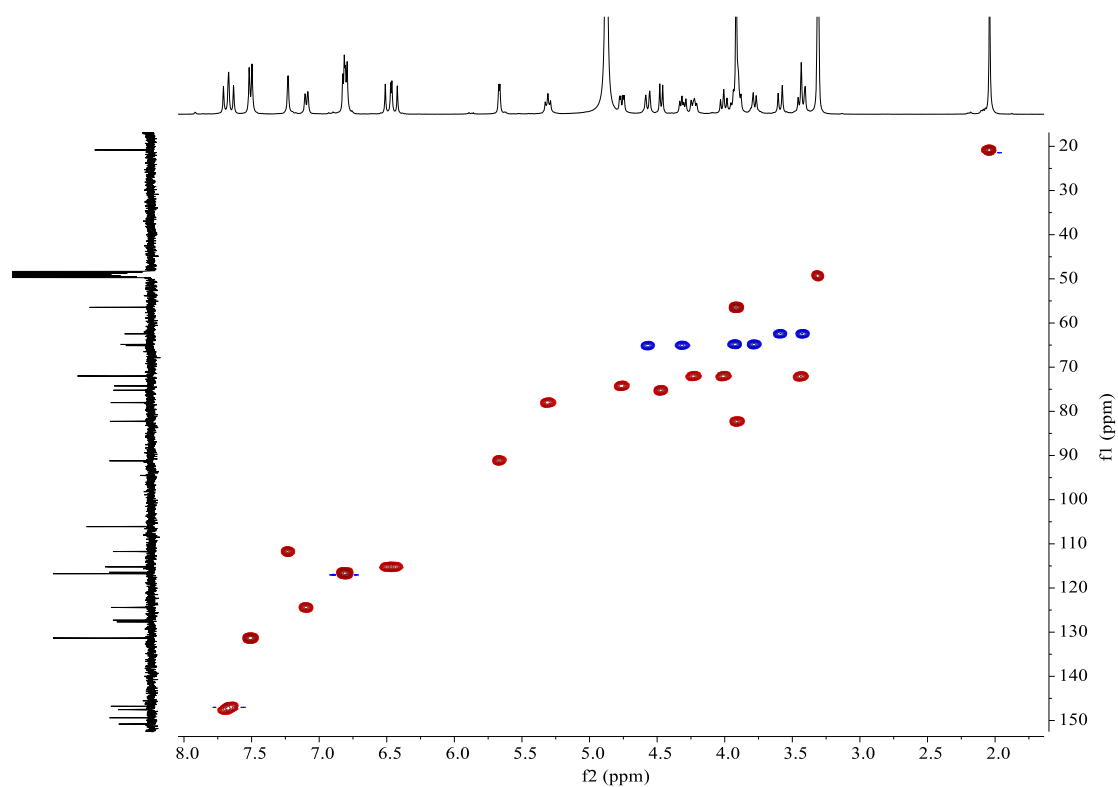

**Figure S125.** HSQC Spectrum of Compound **14** in MeOH- $d_4$

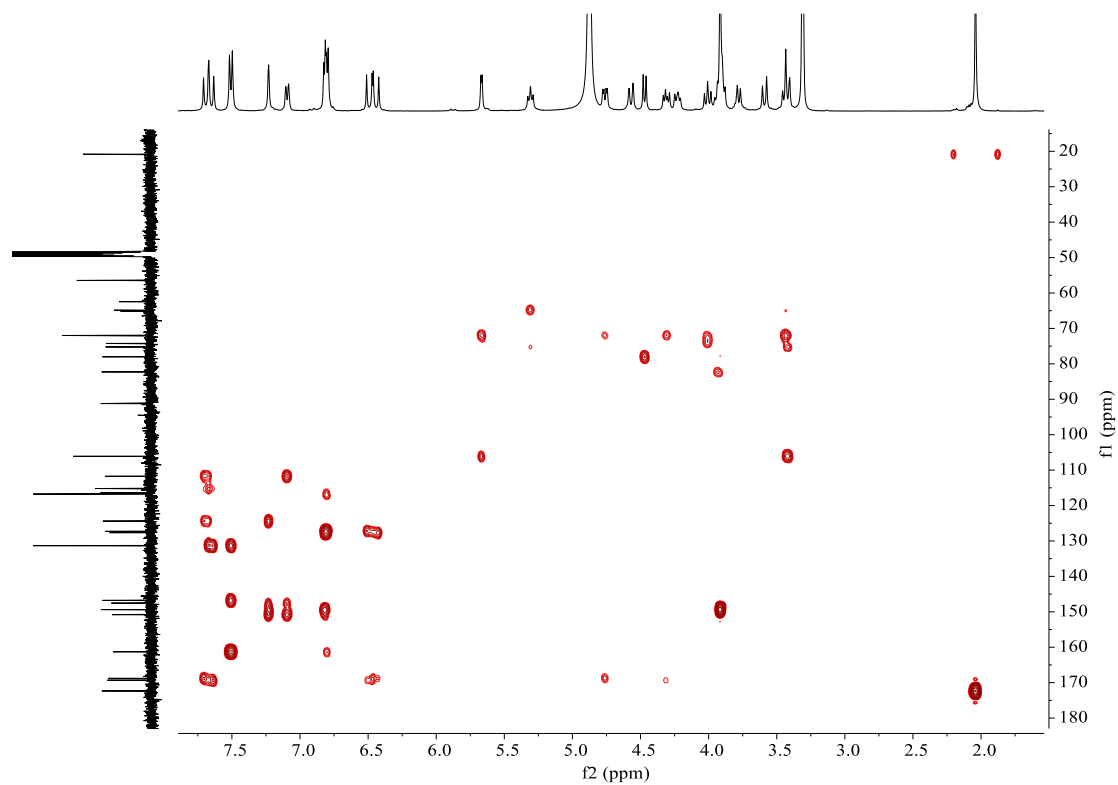

**Figure S126.** HMBC Spectrum of Compound **14** in MeOH- $d_4$

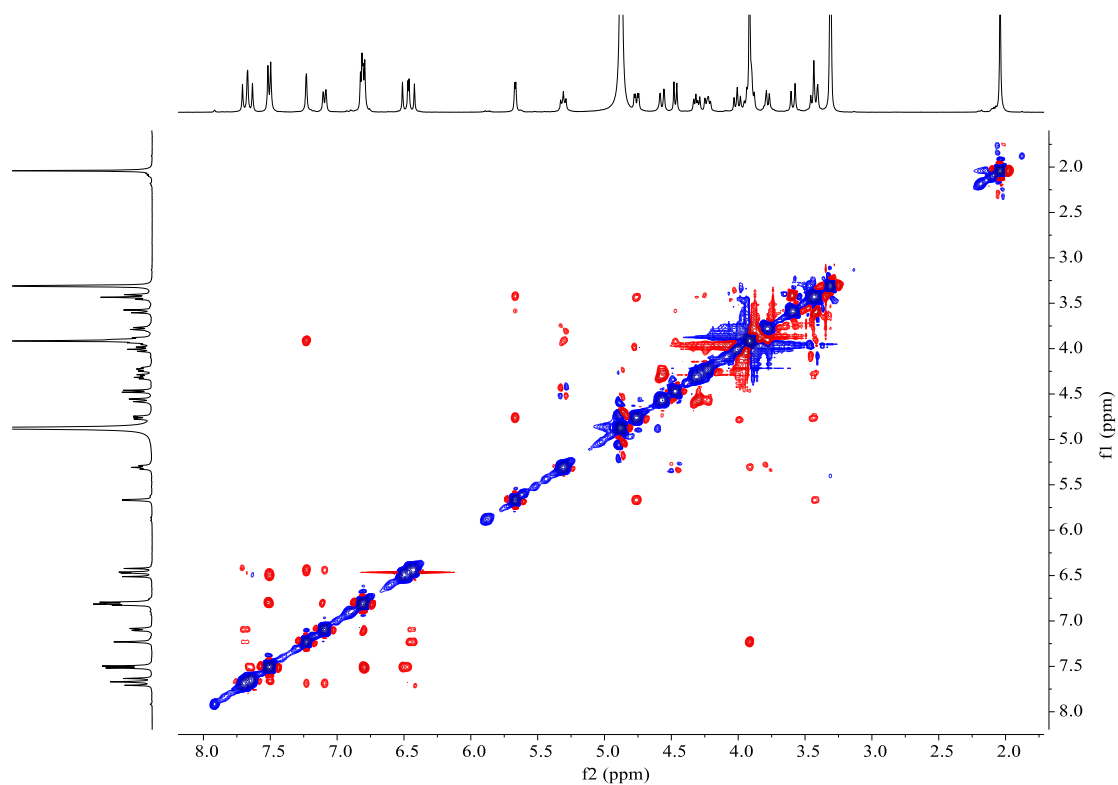

**Figure S127.** NOESY Spectrum of Compound **14** in MeOH- $d_4$

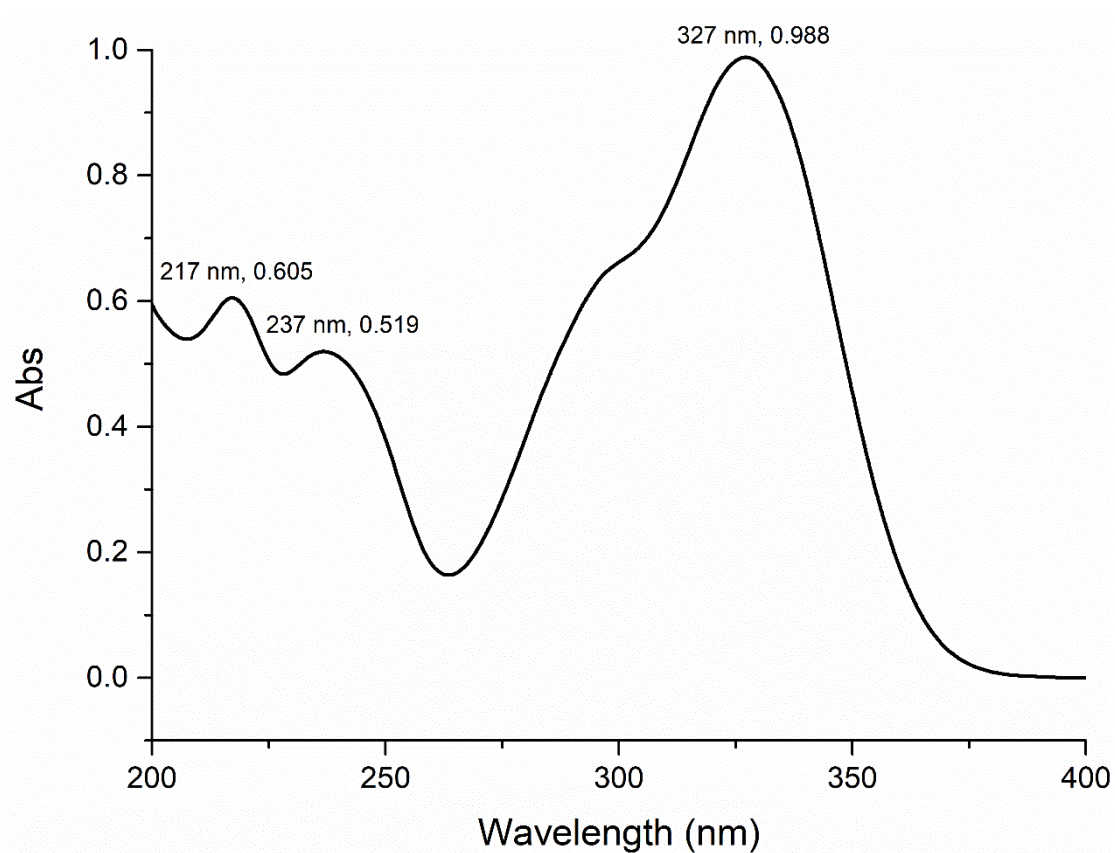

**Figure S128.** UV Spectrum of Compound **15**



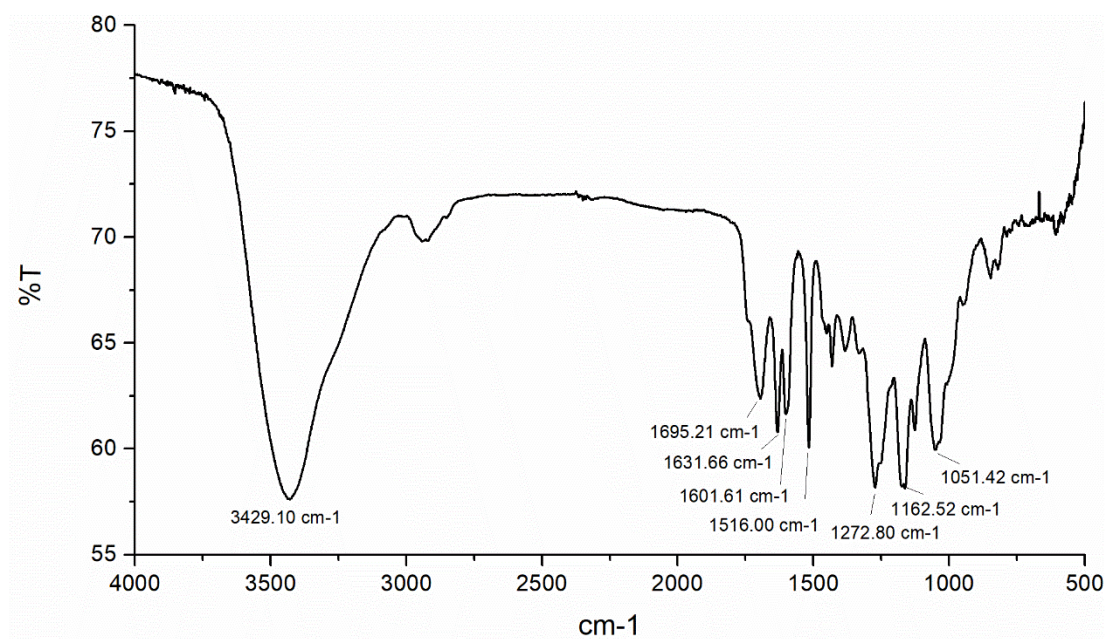

**Figure S129.** IR (KBr disc) Spectrum of Compound **15**

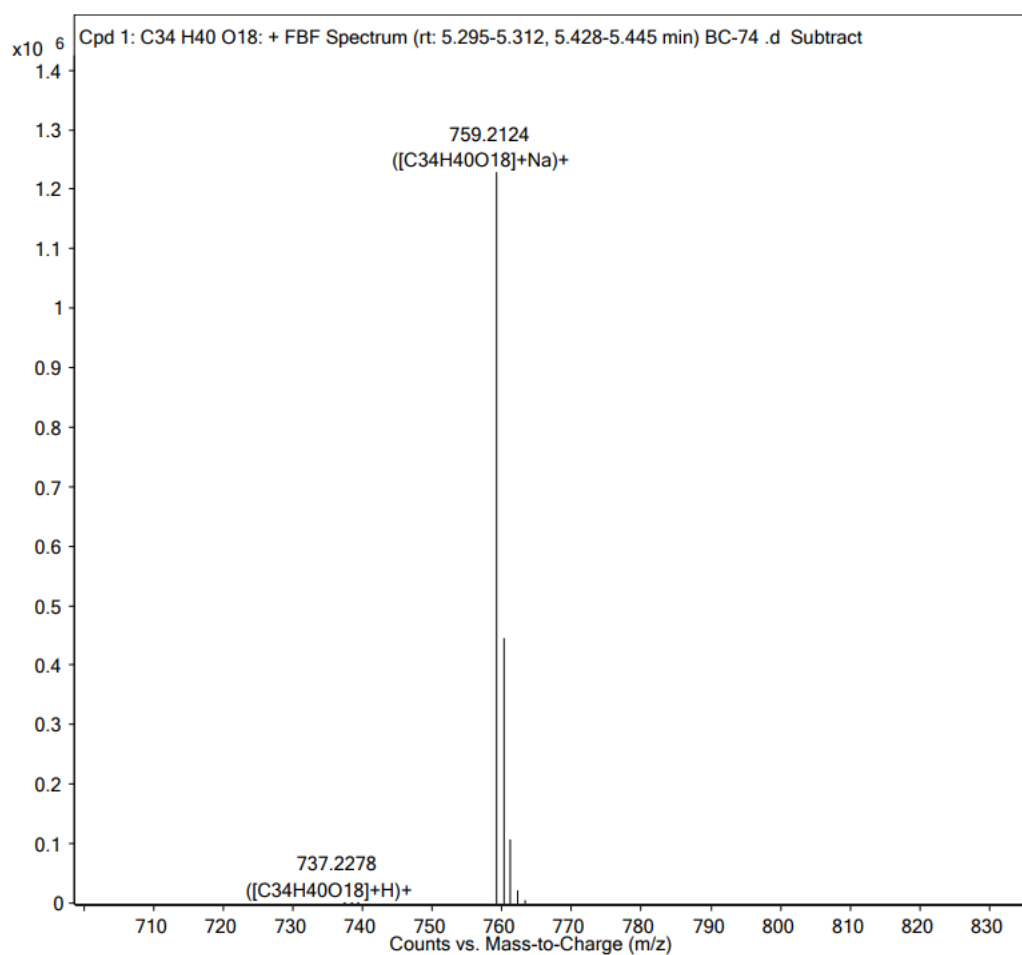

**Figure S130.** (+) HRESIMS Spectrum of Compound **15**



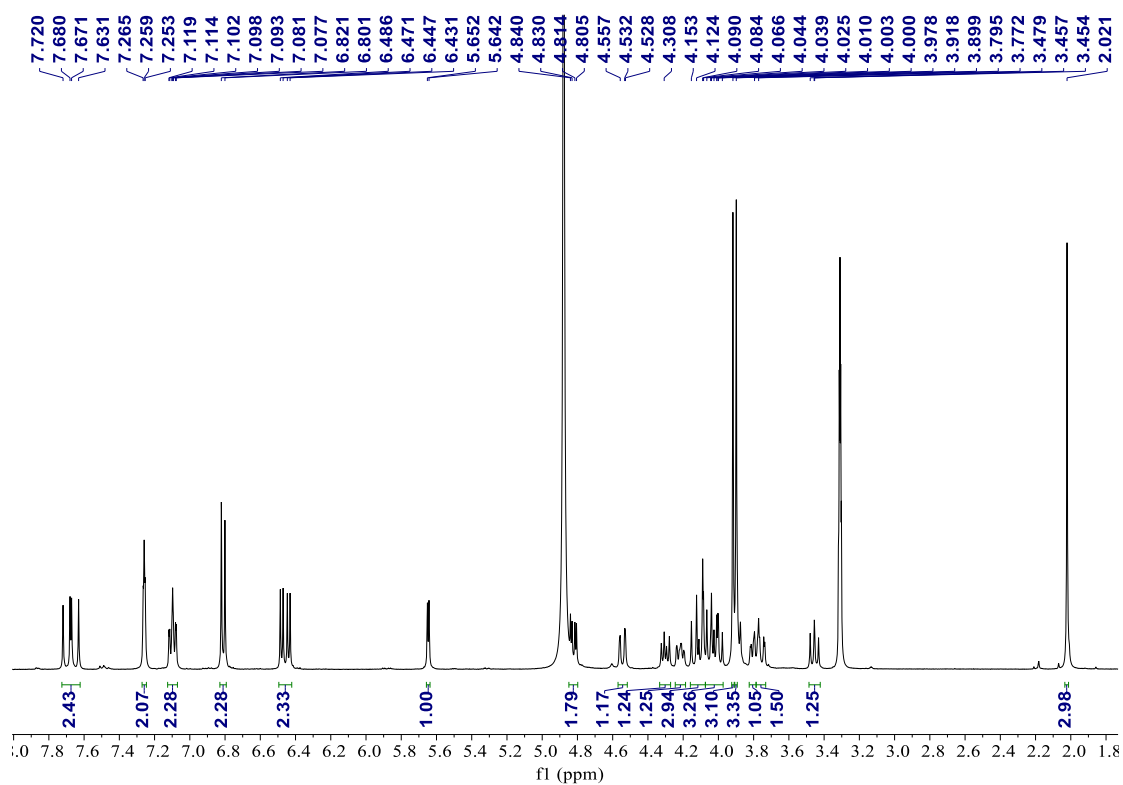

**Figure S131.** <sup>1</sup>H NMR Spectrum of Compound **15** in MeOH-*d*<sub>4</sub>

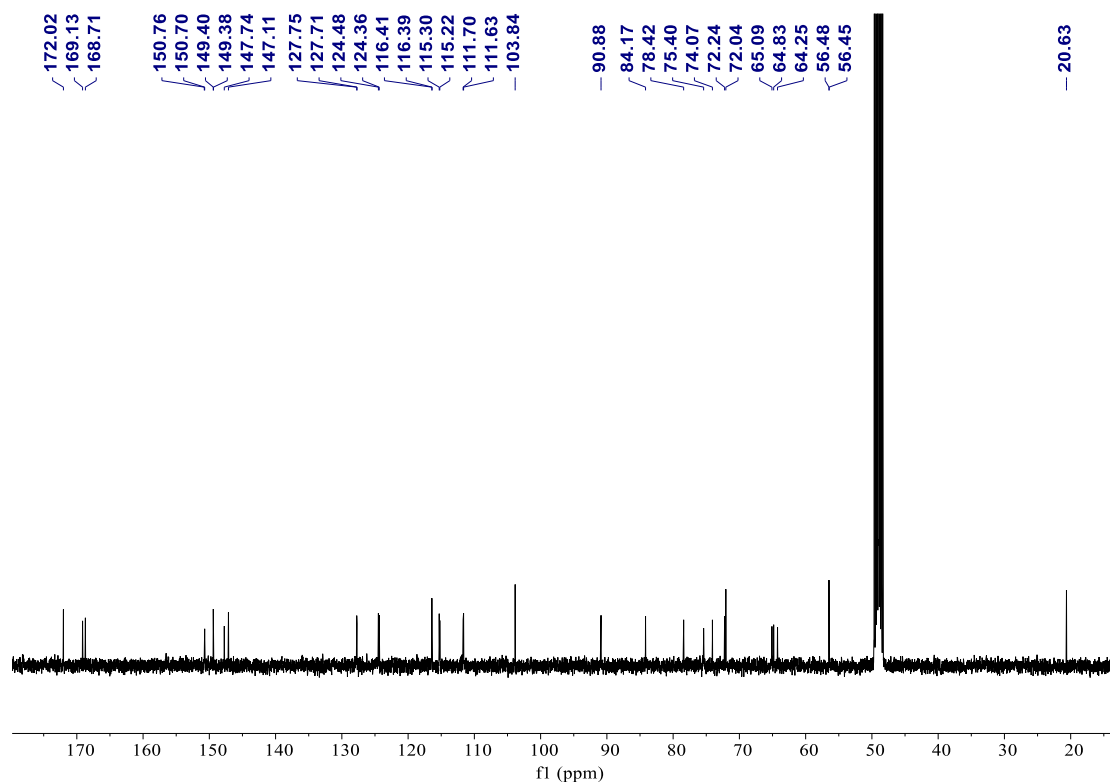

**Figure S132.** <sup>13</sup>C NMR Spectrum of Compound **15** in MeOH-*d*<sub>4</sub>

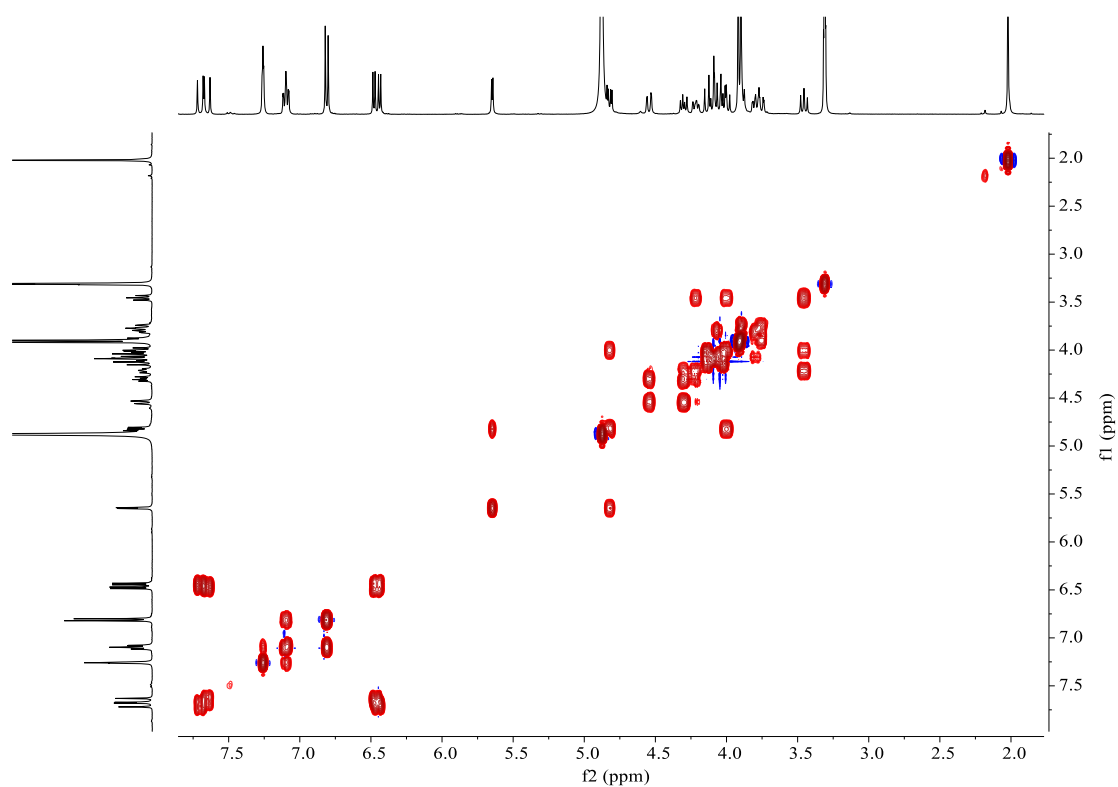

**Figure S133.**  $^1\text{H}$ - $^1\text{H}$  COSY Spectrum of Compound **15** in  $\text{MeOH-}d_4$

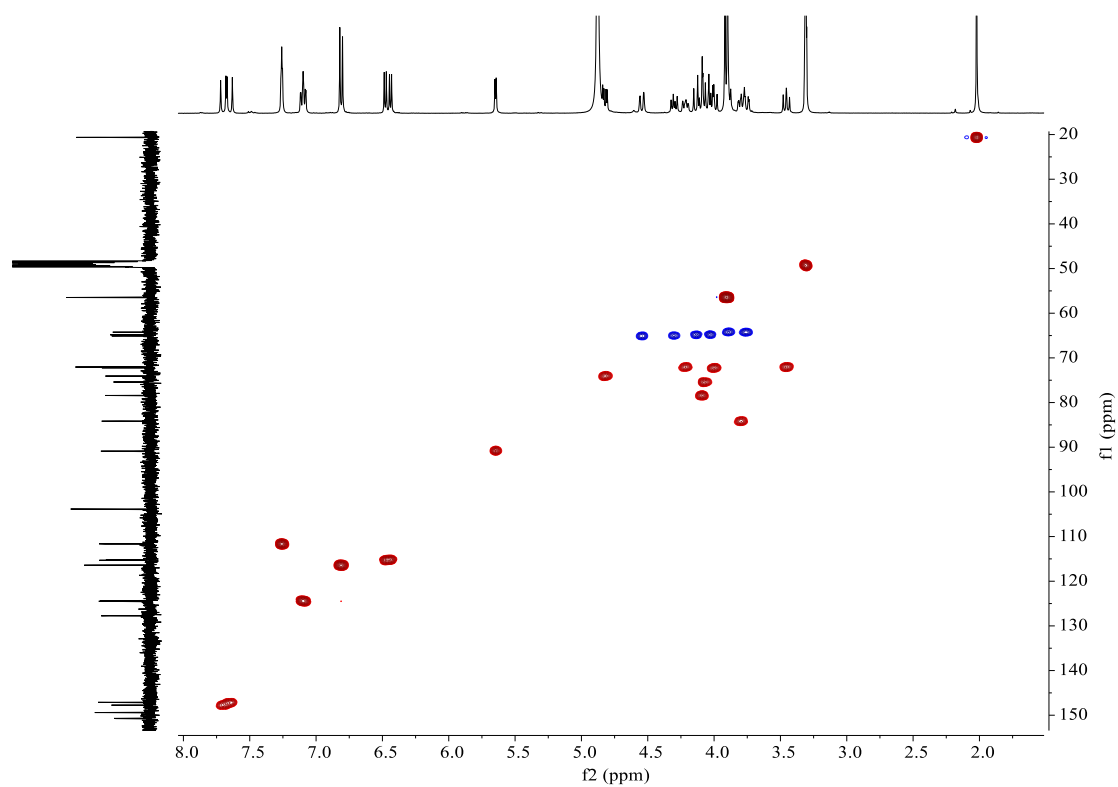

**Figure S134.** HSQC Spectrum of Compound **15** in  $\text{MeOH-}d_4$

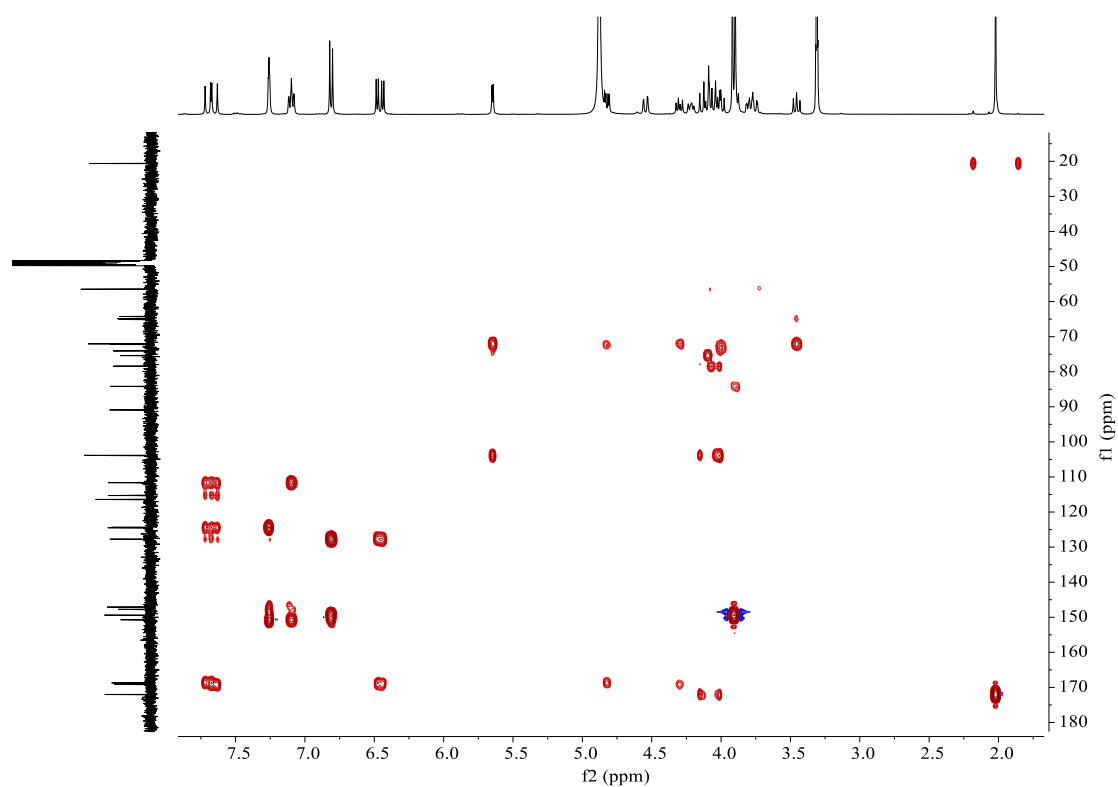

**Figure S135.** HMBC Spectrum of Compound **15** in MeOH- $d_4$

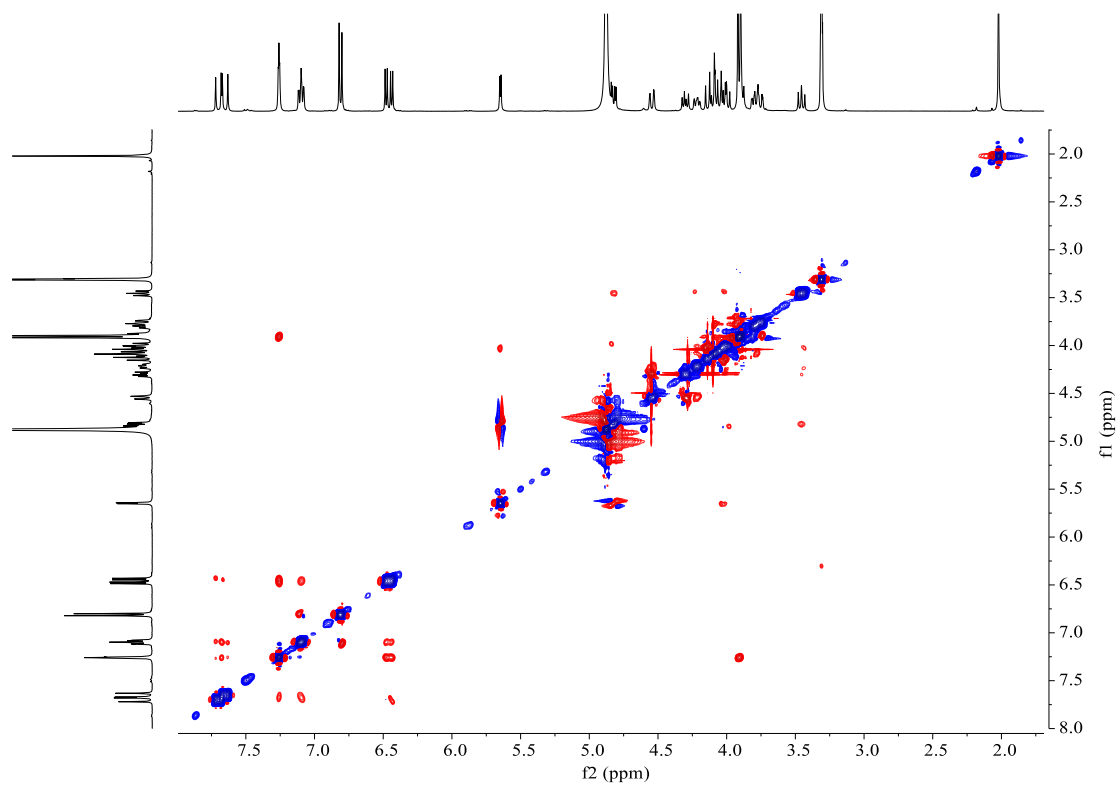

**Figure S136.** NOESY Spectrum of Compound **15** in MeOH- $d_4$

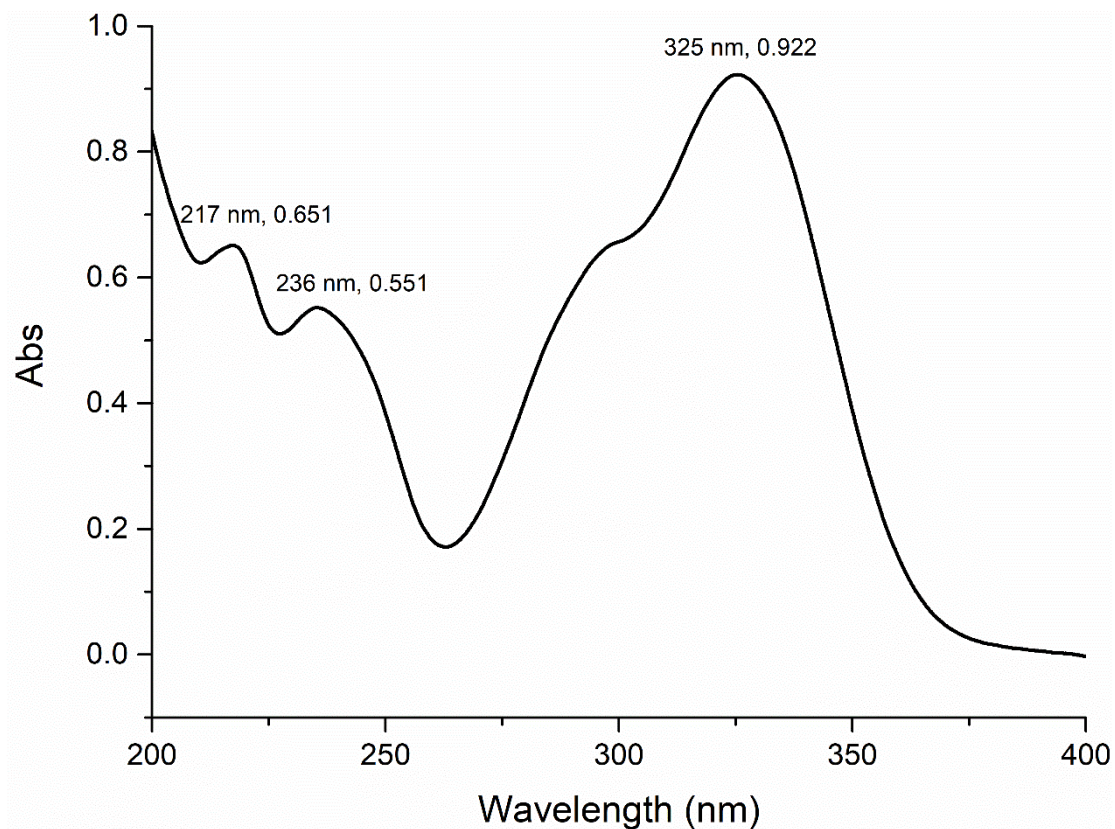

**Figure S137.** UV Spectrum of Compound **16**

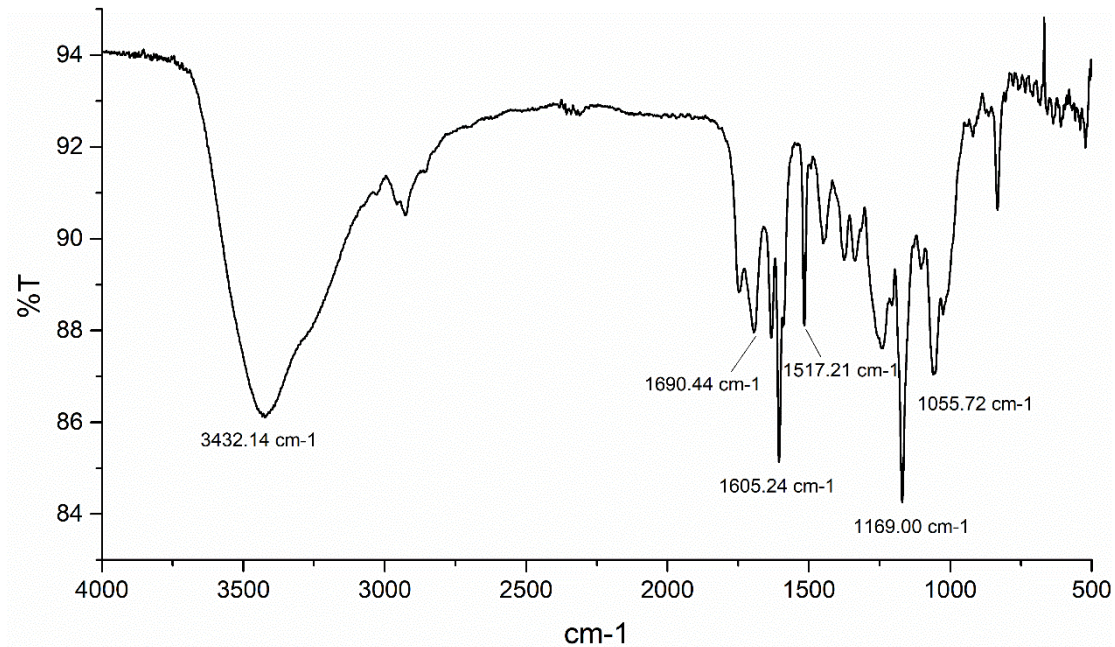

**Figure S138.** IR (KBr disc) Spectrum of Compound **16**

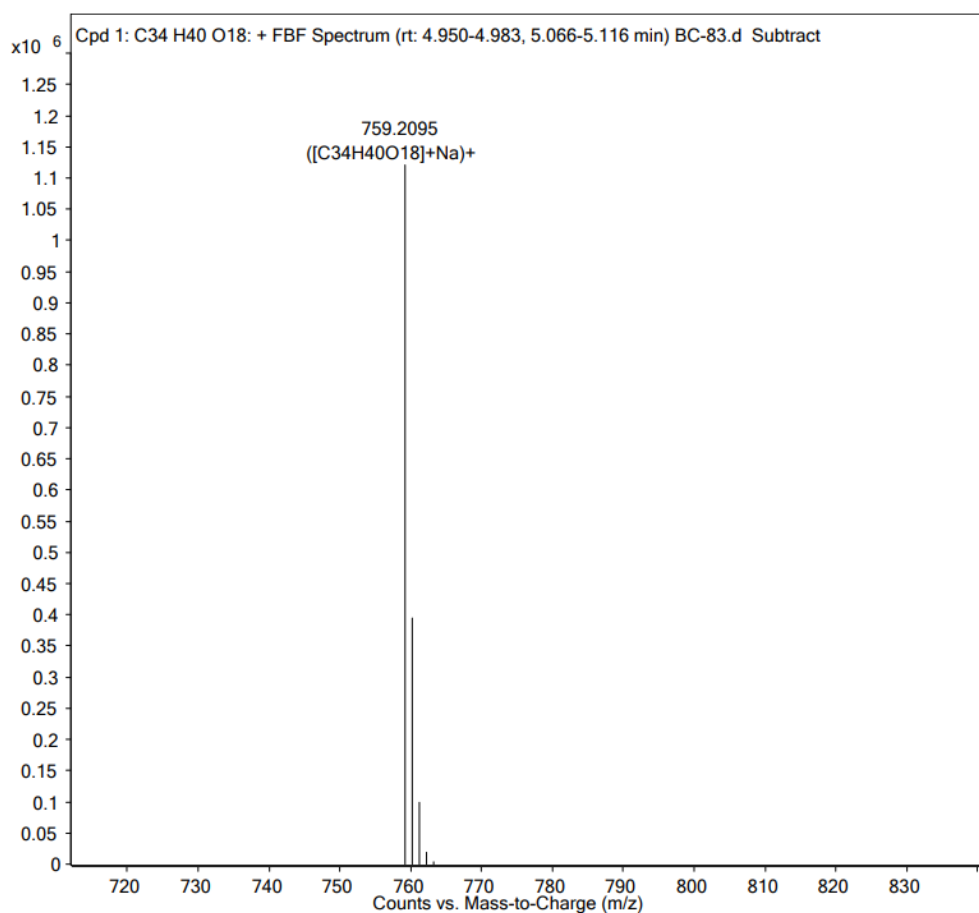

**Figure S139.** (+) HRESIMS Spectrum of Compound **16**

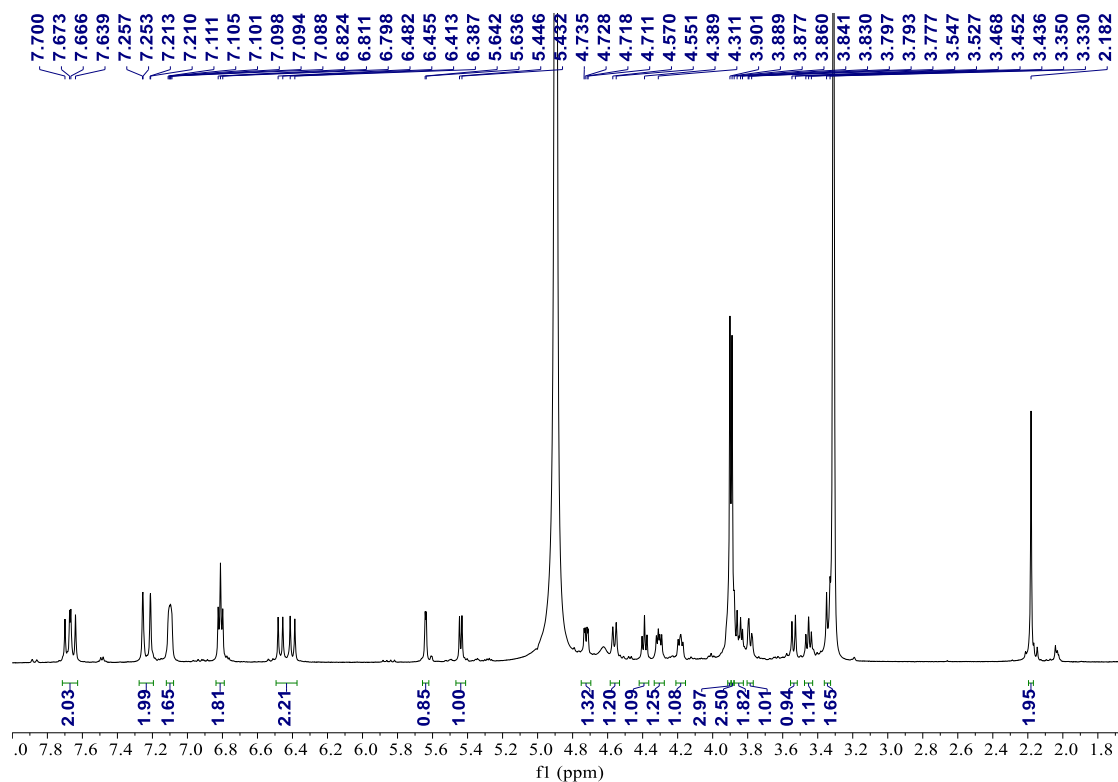

**Figure S140.** <sup>1</sup>H NMR Spectrum of Compound **16** in MeOH-*d*<sub>4</sub>

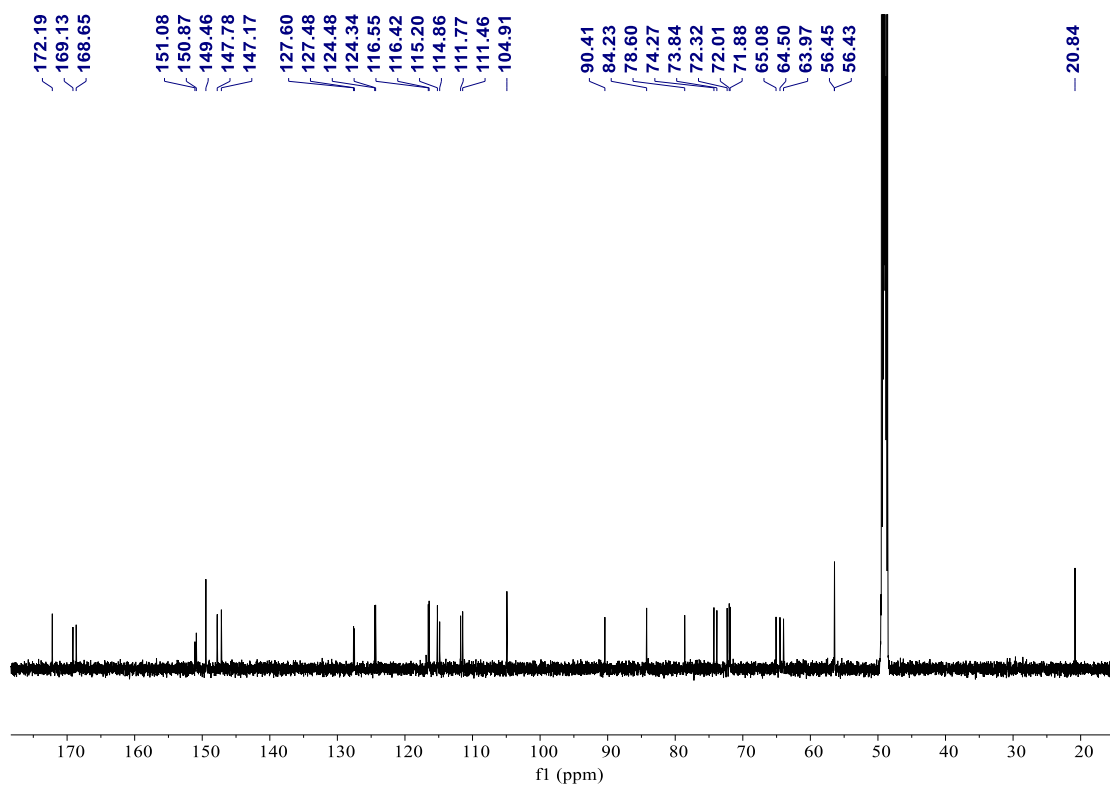

**Figure S141.**  $^{13}\text{C}$  NMR Spectrum of Compound **16** in  $\text{MeOH-}d_4$

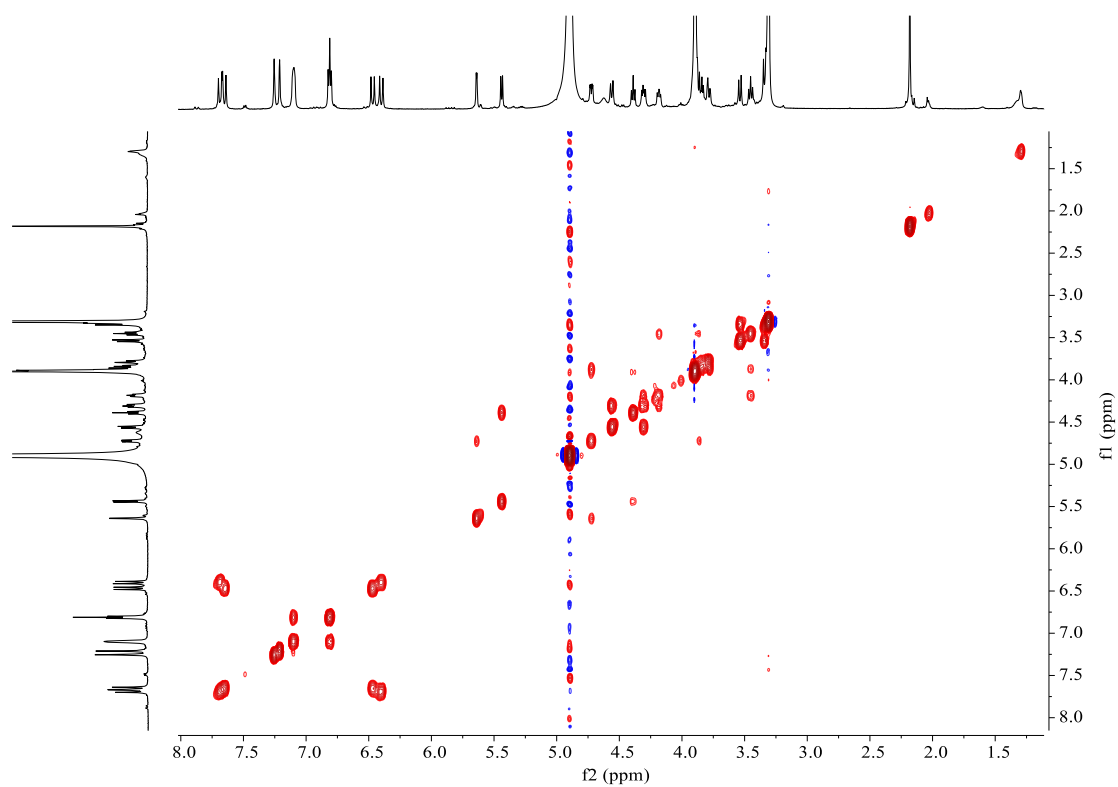

**Figure S142.**  $^1\text{H}$ – $^1\text{H}$  COSY Spectrum of Compound **16** in  $\text{MeOH-}d_4$

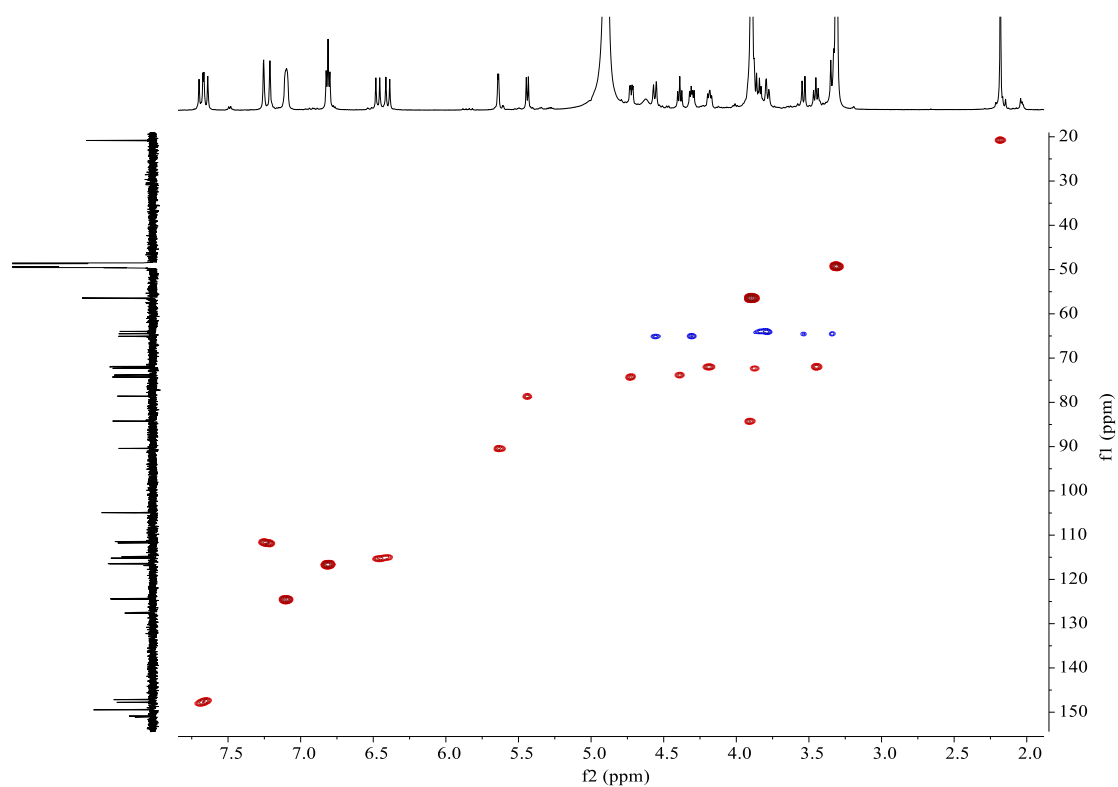

**Figure S143.** HSQC Spectrum of Compound **16** in MeOH- $d_4$

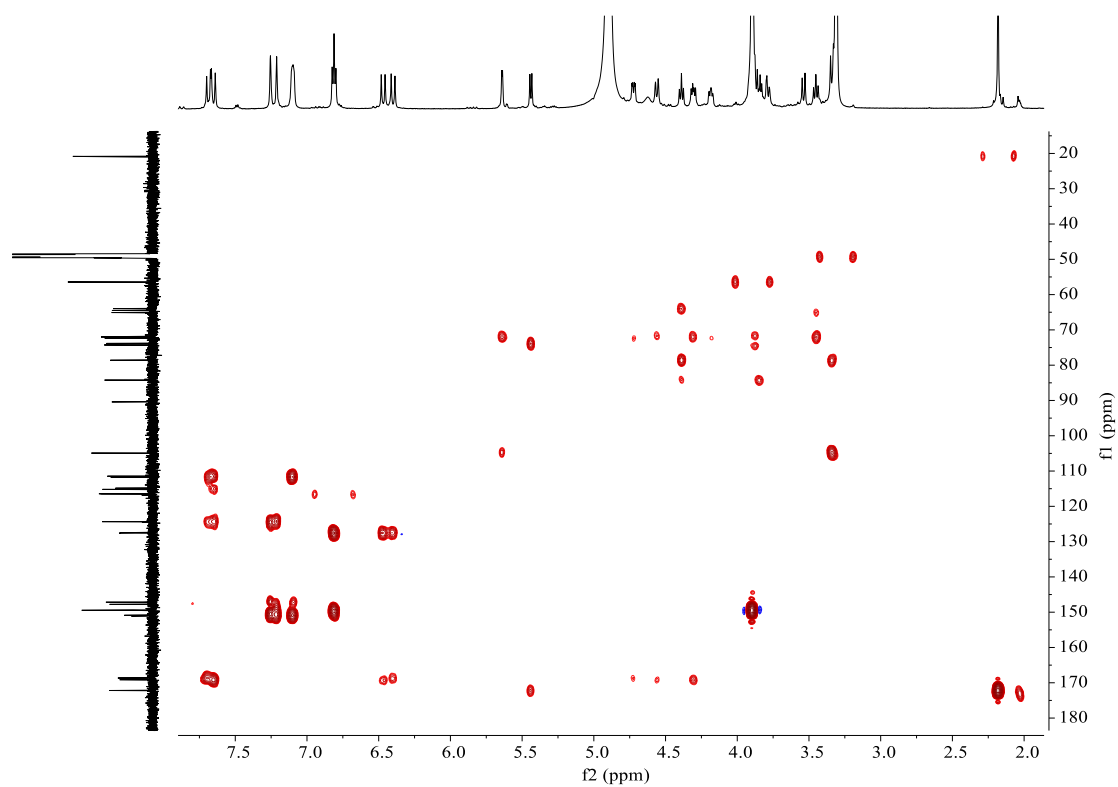

**Figure S144.** HMBC Spectrum of Compound **16** in MeOH- $d_4$

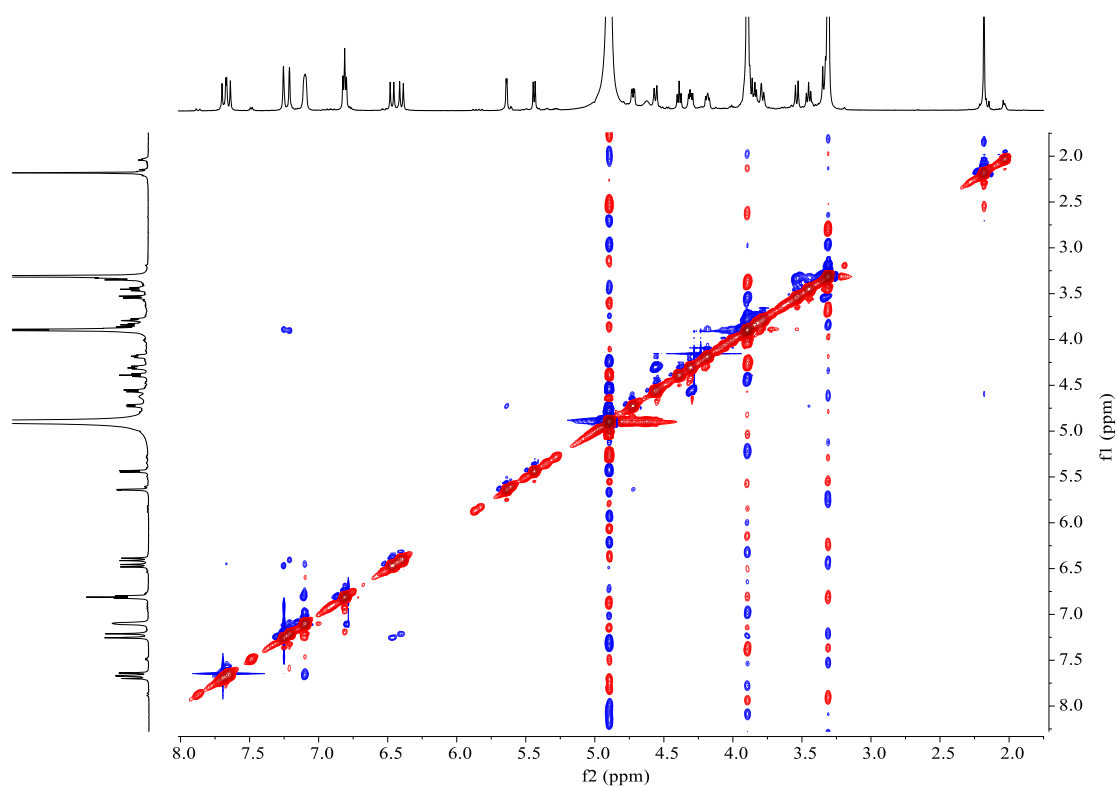

**Figure S145.** NOESY Spectrum of Compound **16** in MeOH- $d_4$

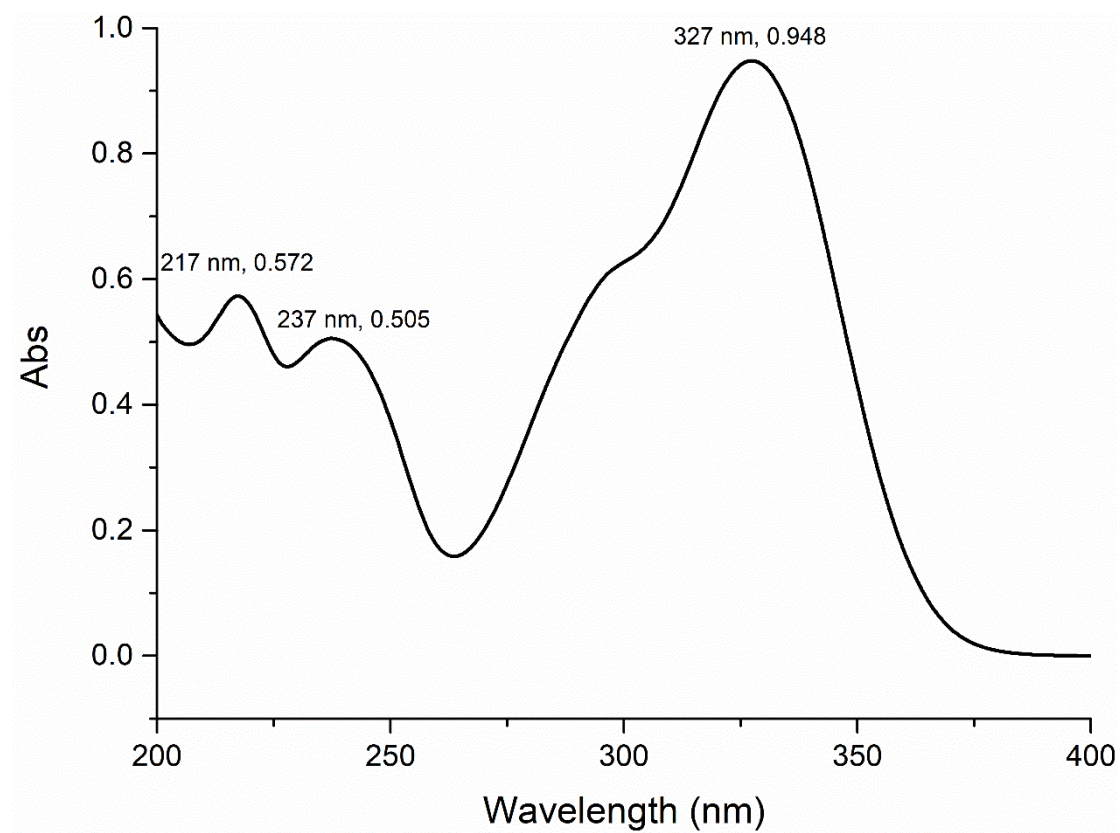

**Figure S146.** UV Spectrum of Compound **17**



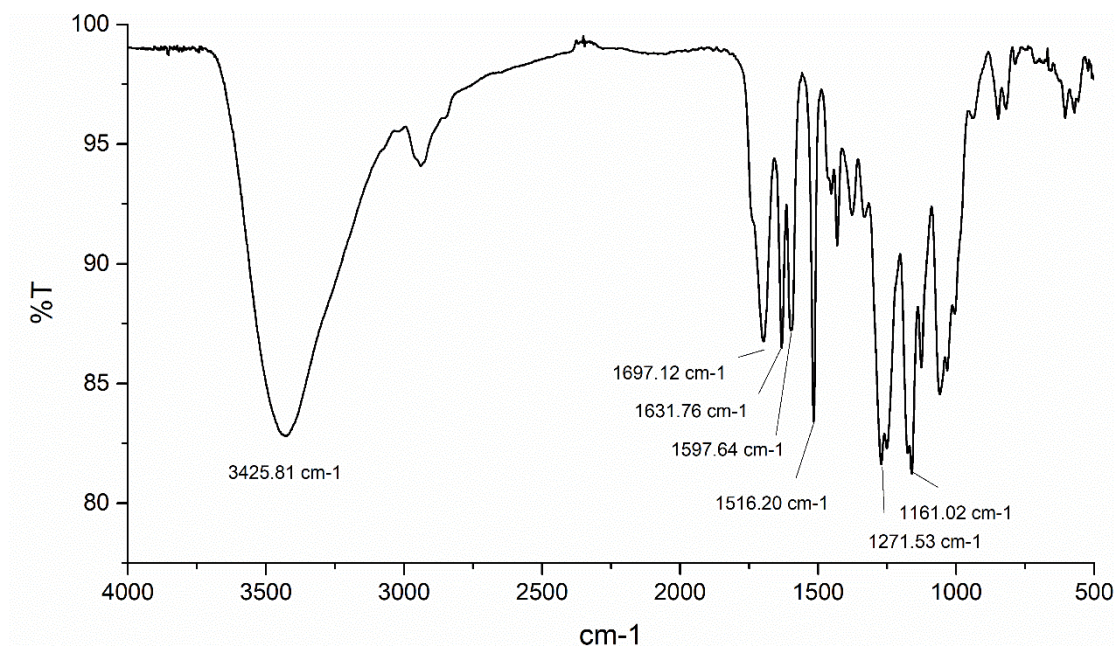

**Figure S147.** IR (KBr disc) Spectrum of Compound **17**

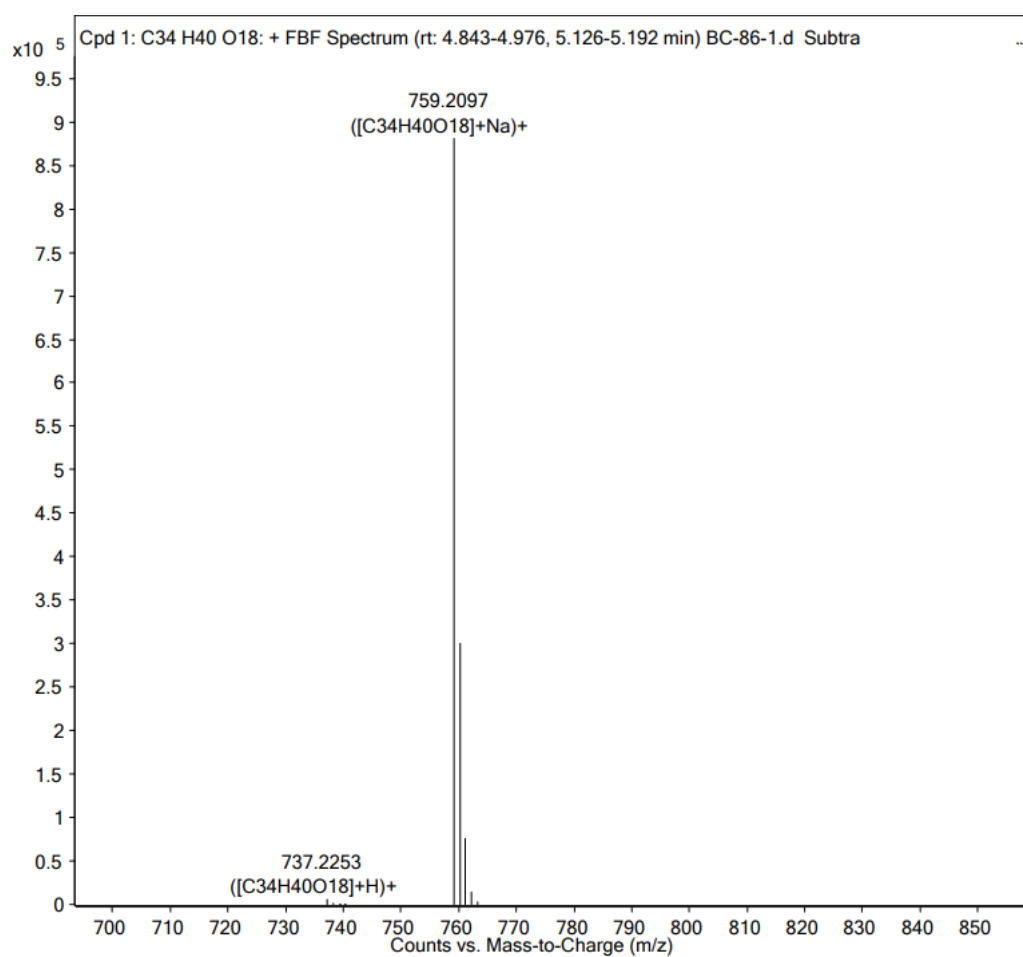

**Figure S148.** (+) HRESIMS Spectrum of Compound **17**

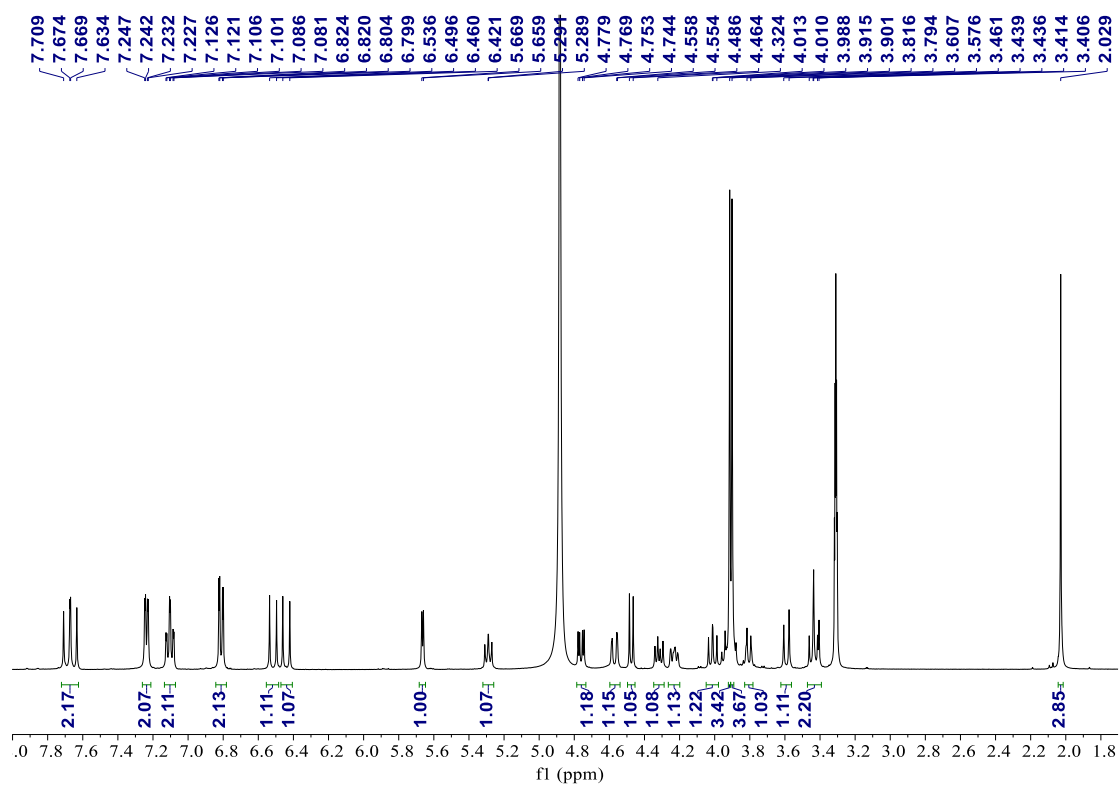

**Figure S149.  $^1\text{H}$  NMR Spectrum of Compound 17 in  $\text{MeOH-}d_4$**

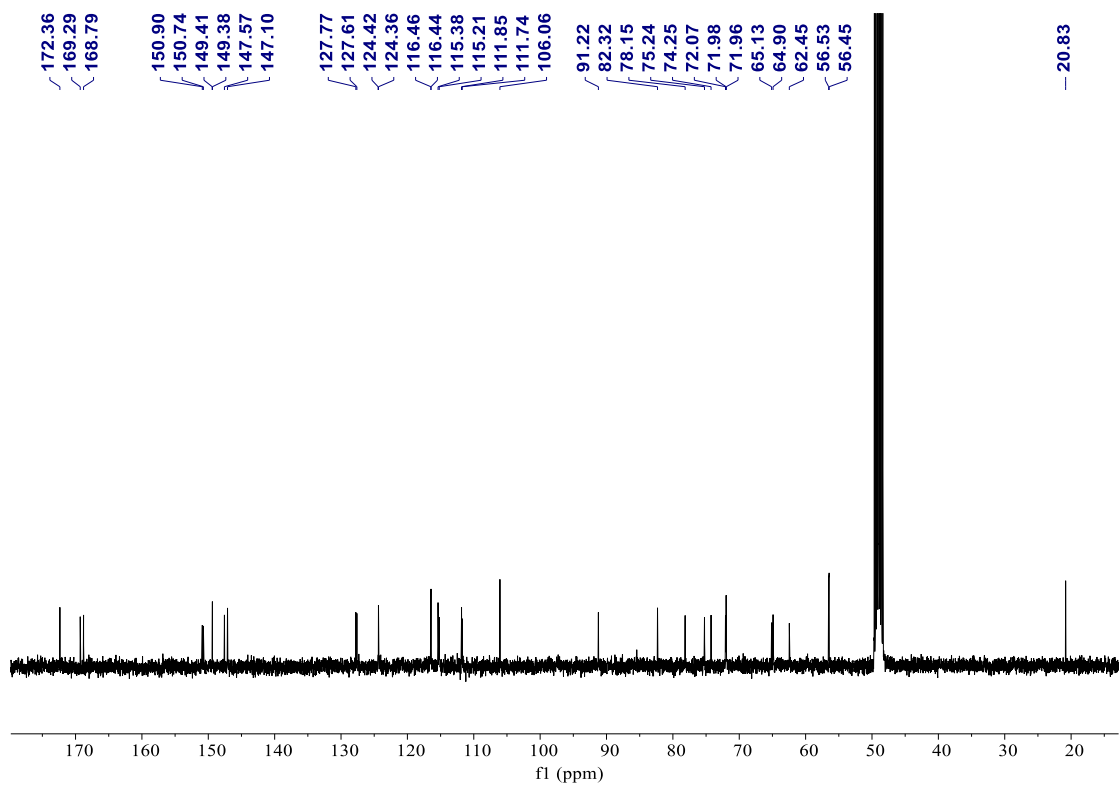

**Figure S150.  $^{13}\text{C}$  NMR Spectrum of Compound 17 in  $\text{MeOH-}d_4$**

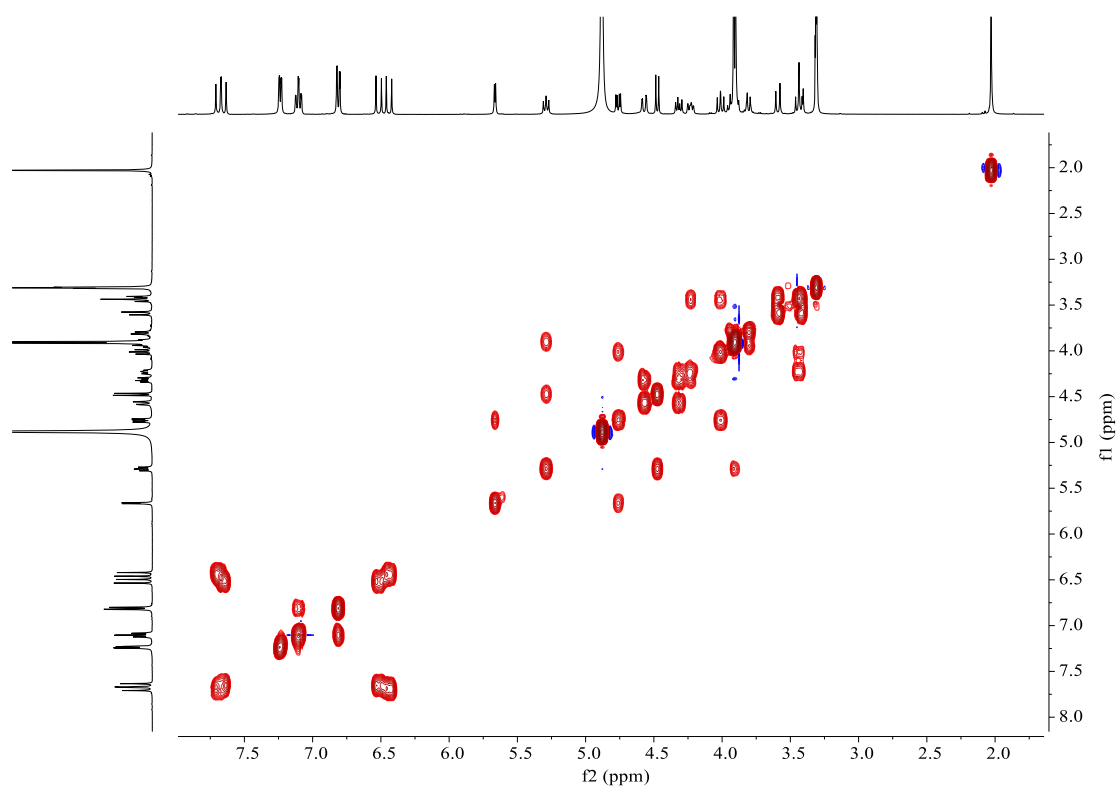

**Figure S151.**  $^1\text{H}$ - $^1\text{H}$  COSY Spectrum of Compound **17** in  $\text{MeOH-}d_4$

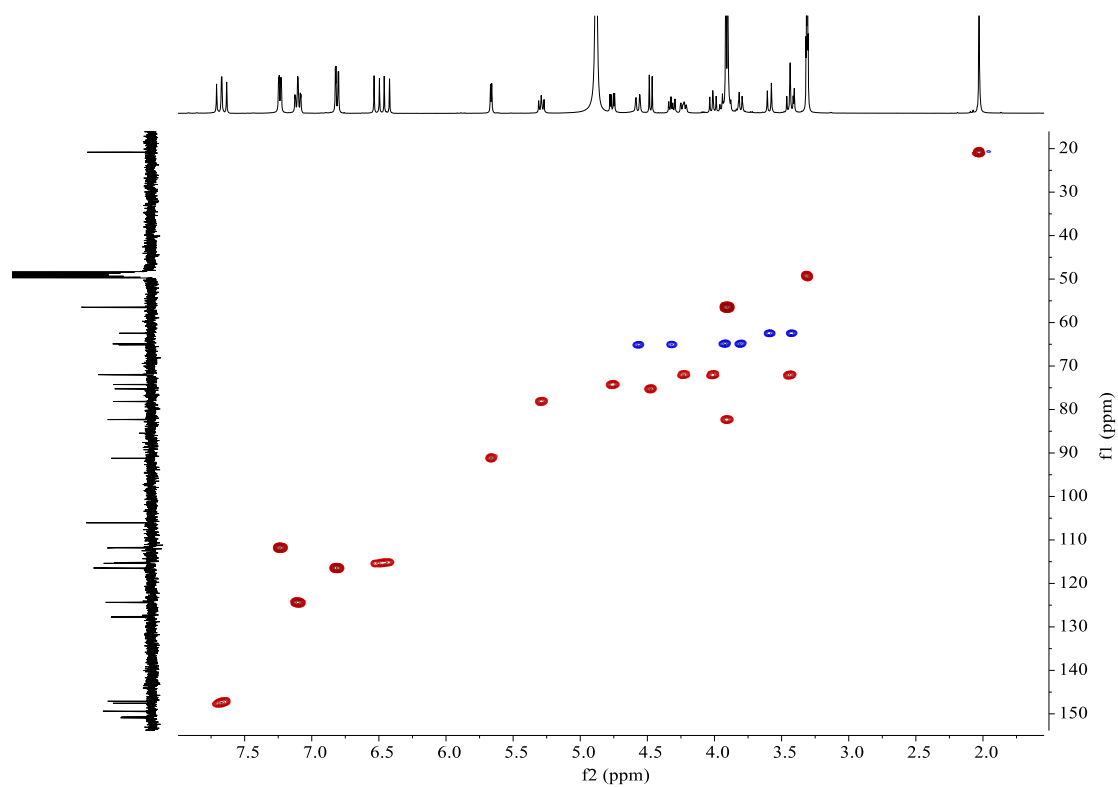

**Figure S152.** HSQC Spectrum of Compound **17** in  $\text{MeOH-}d_4$

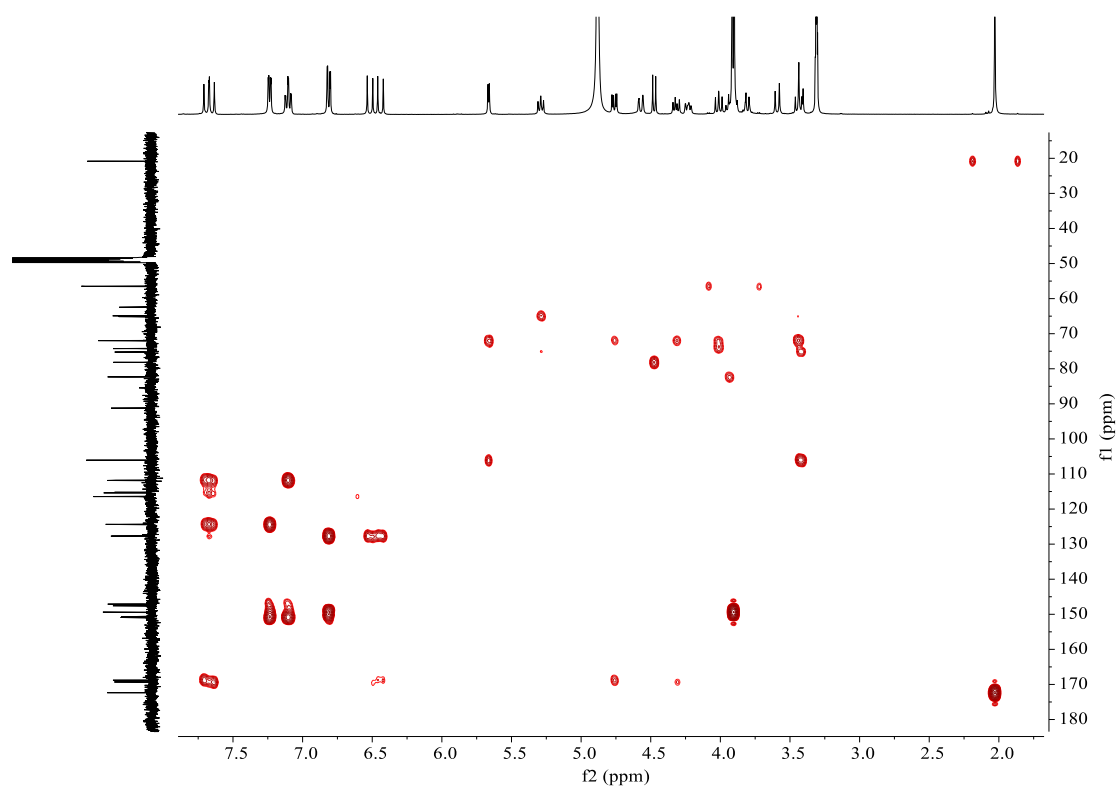

**Figure S153.** HMBC Spectrum of Compound **17** in  $\text{MeOH-}d_4$

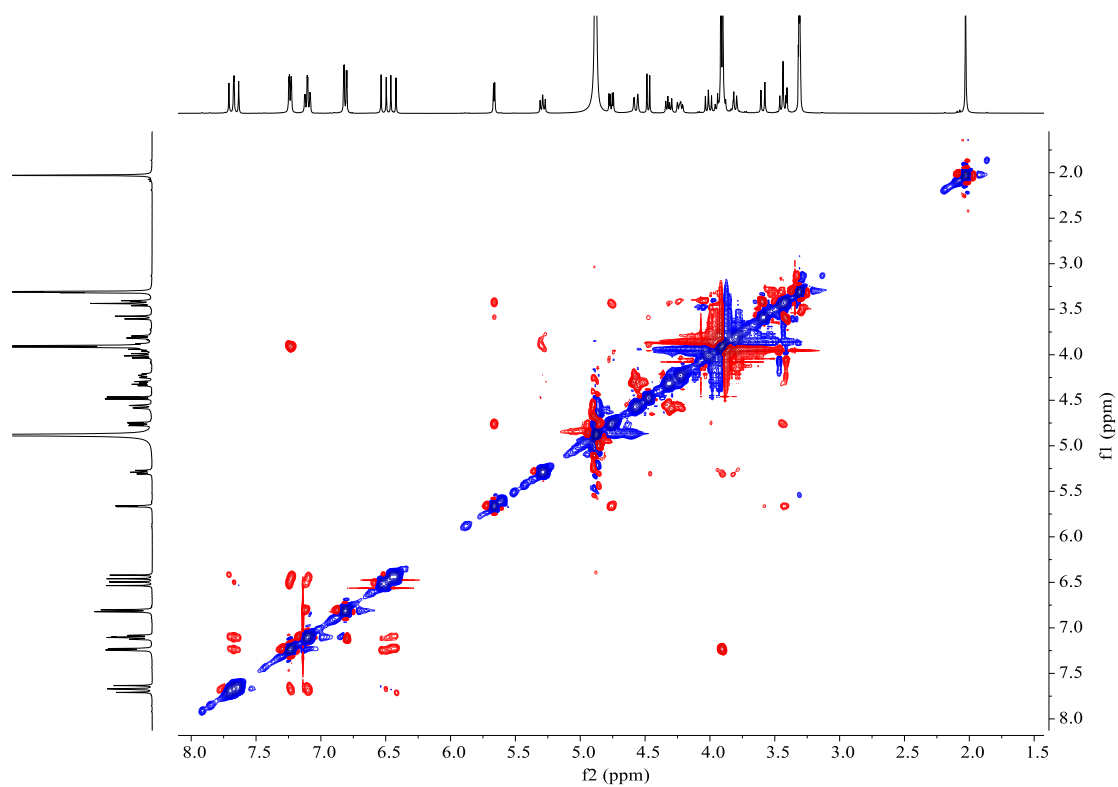

**Figure S154.** NOESY Spectrum of Compound **17** in  $\text{MeOH-}d_4$

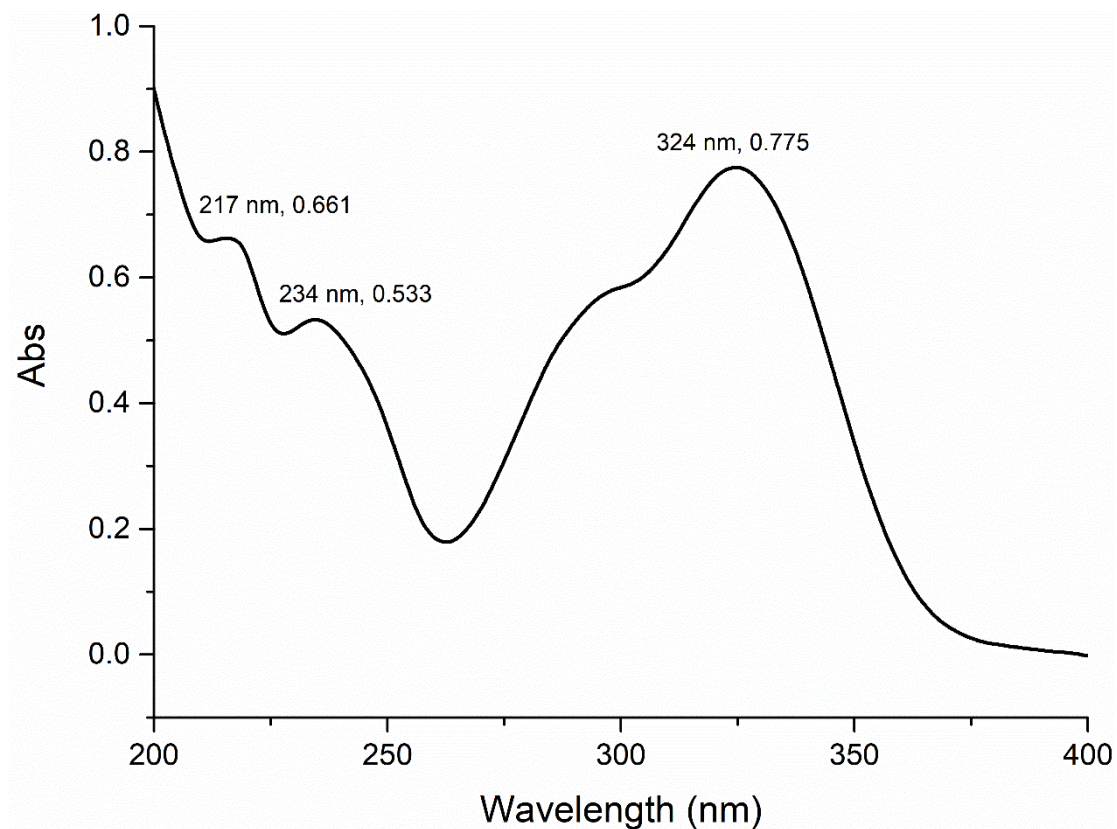

**Figure S155.** UV Spectrum of Compound **18**

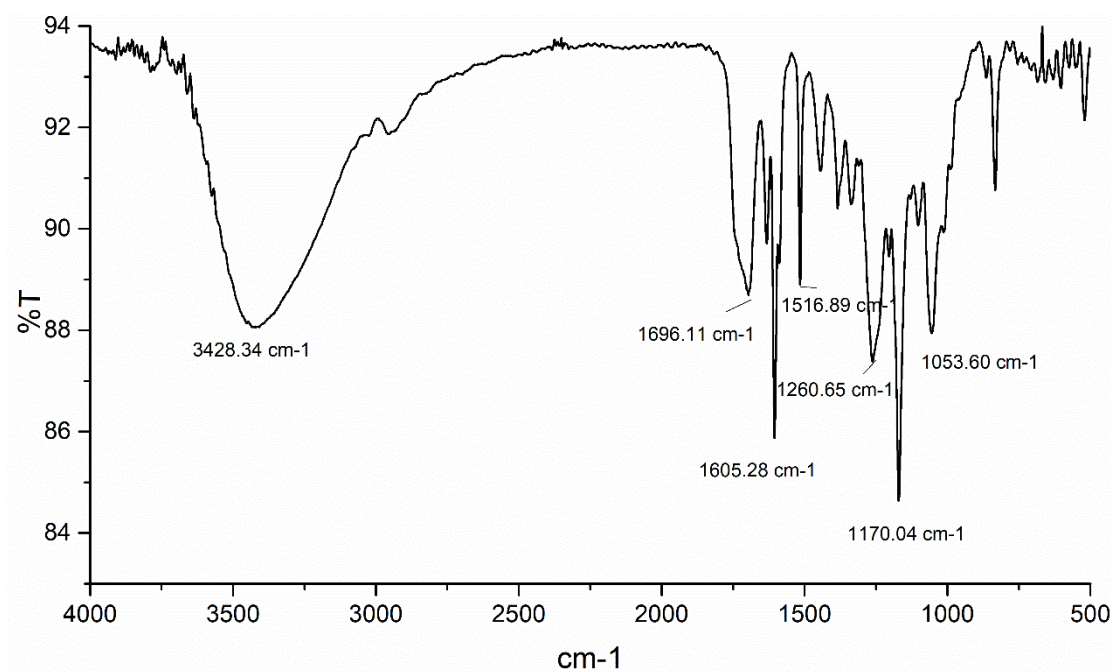

**Figure S156.** IR (KBr disc) Spectrum of Compound **18**

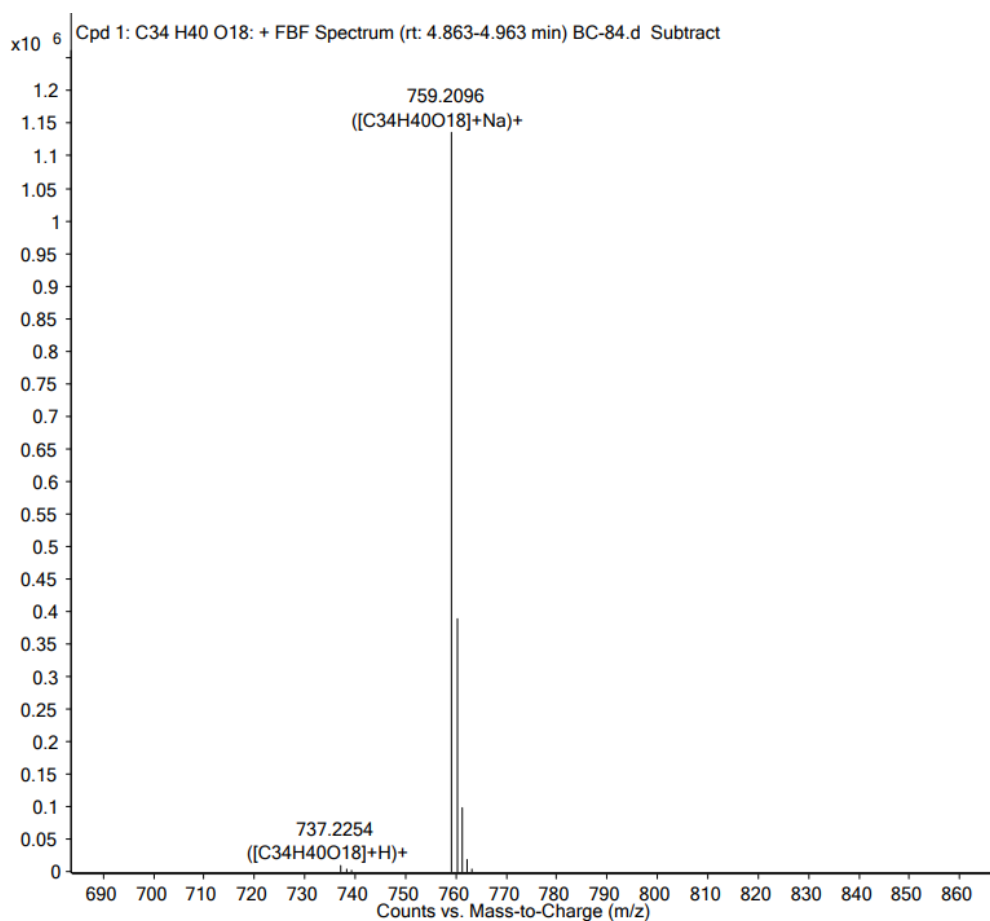

**Figure S157.** (+) HRESIMS Spectrum of Compound **18**

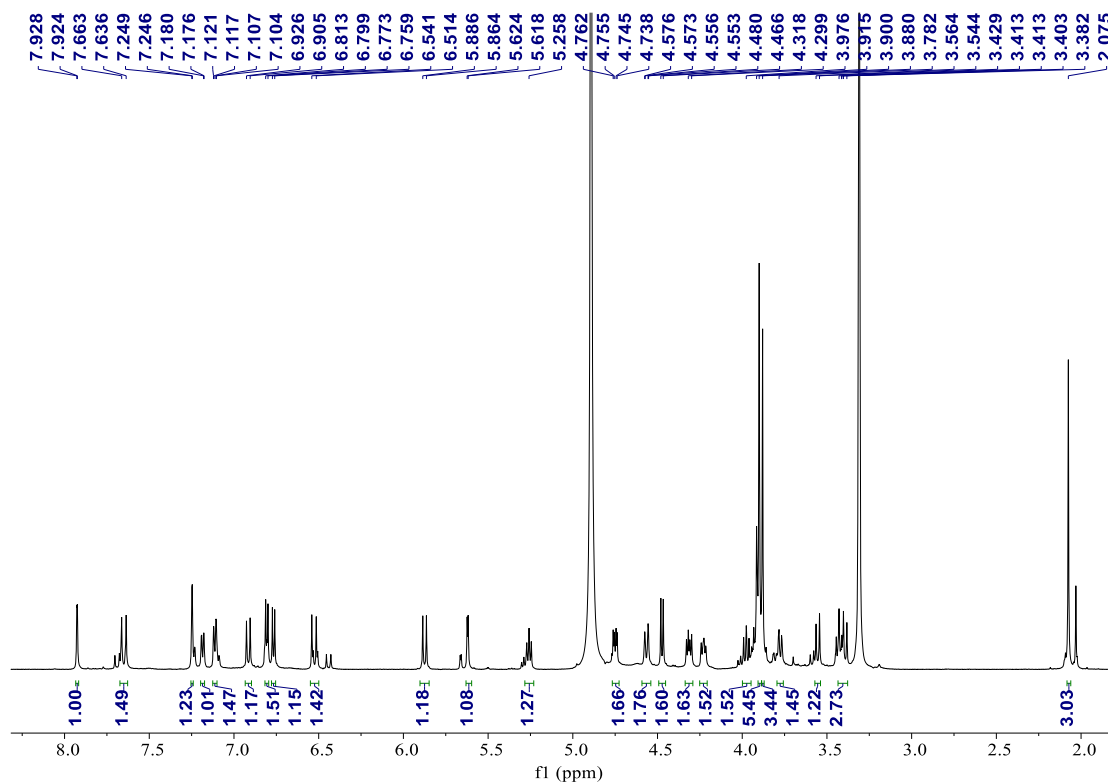

**Figure S158.**  $^1\text{H}$  NMR Spectrum of Compound **18** in  $\text{MeOH-}d_4$

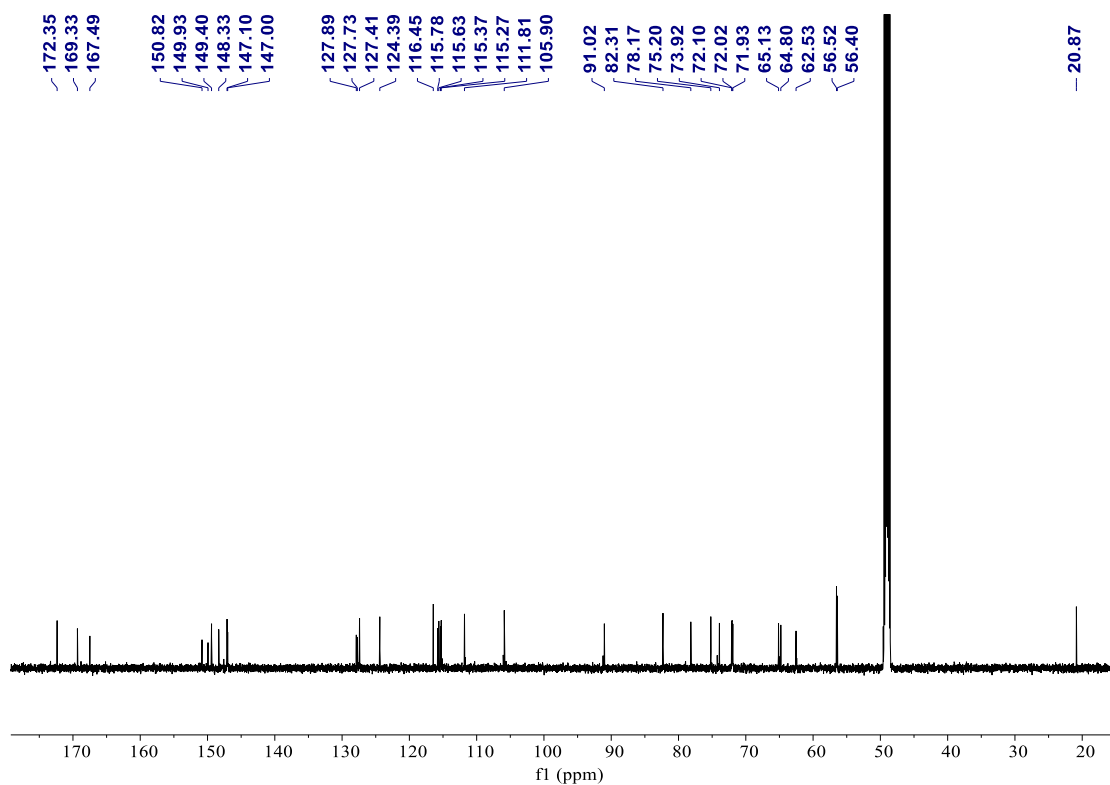

**Figure S159.**  $^{13}\text{C}$  NMR Spectrum of Compound **18** in  $\text{MeOH-}d_4$

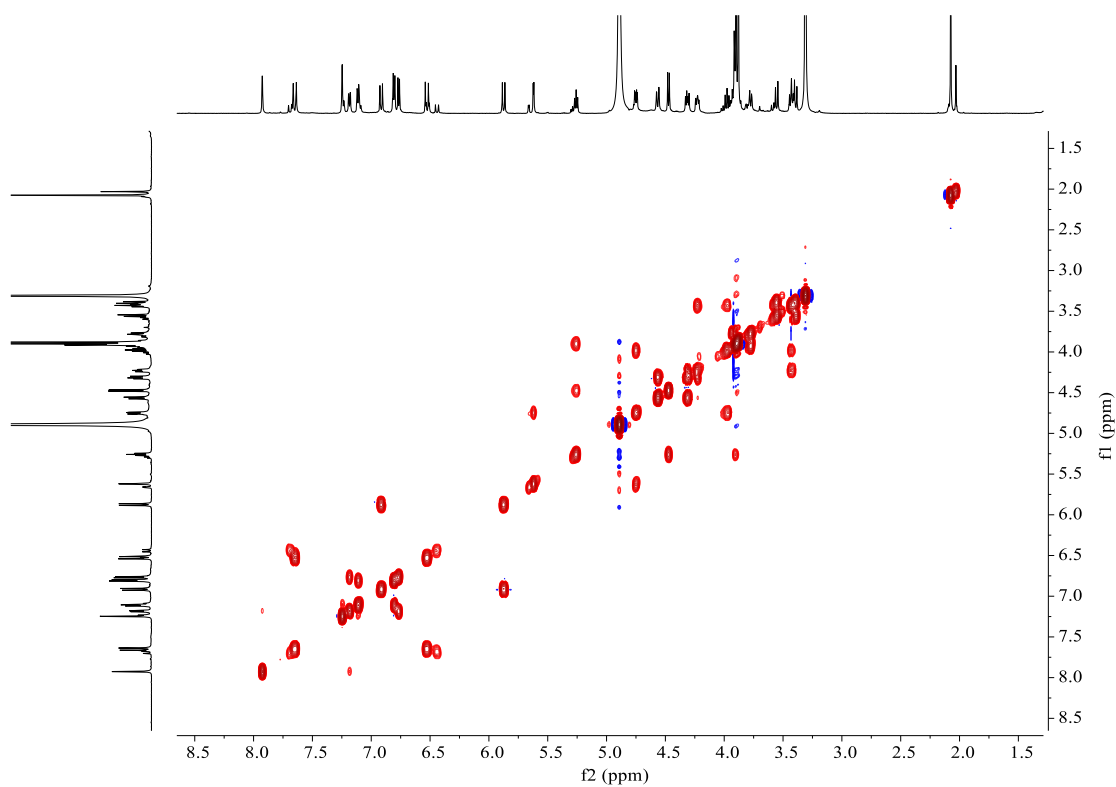

**Figure S160.**  $^1\text{H}$ - $^1\text{H}$  COSY Spectrum of Compound **18** in  $\text{MeOH-}d_4$

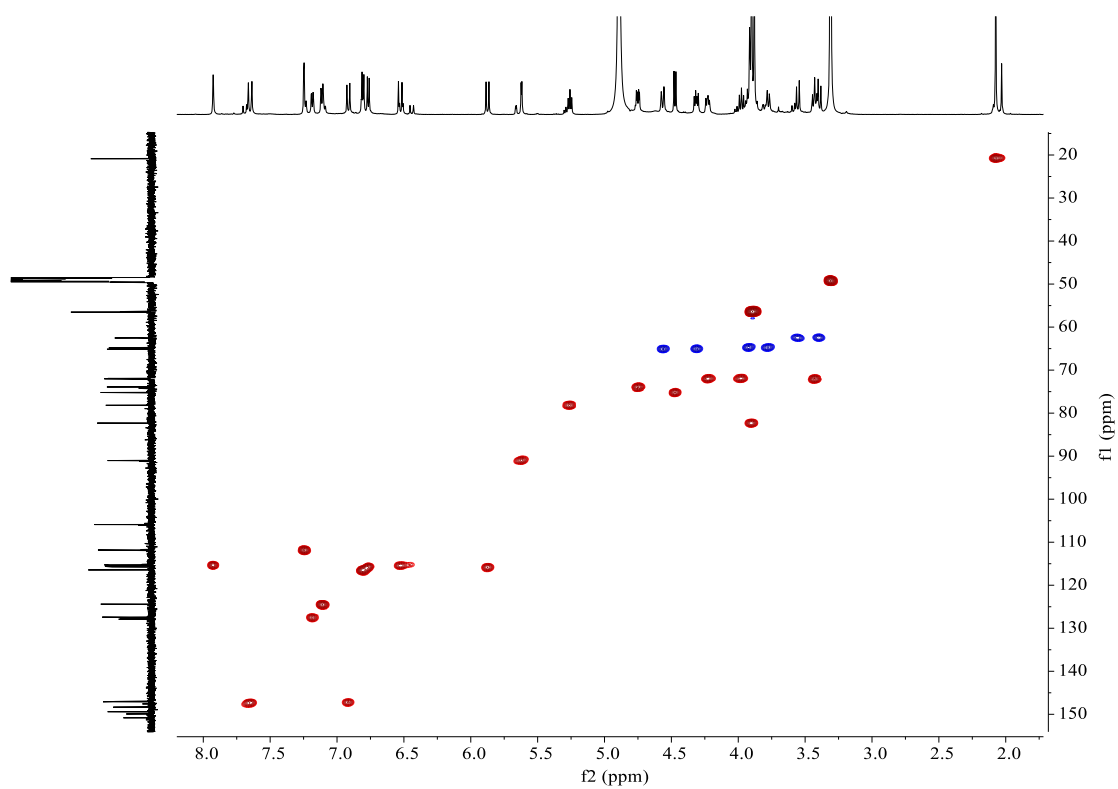

**Figure S161.** HSQC Spectrum of Compound **18** in MeOH- $d_4$

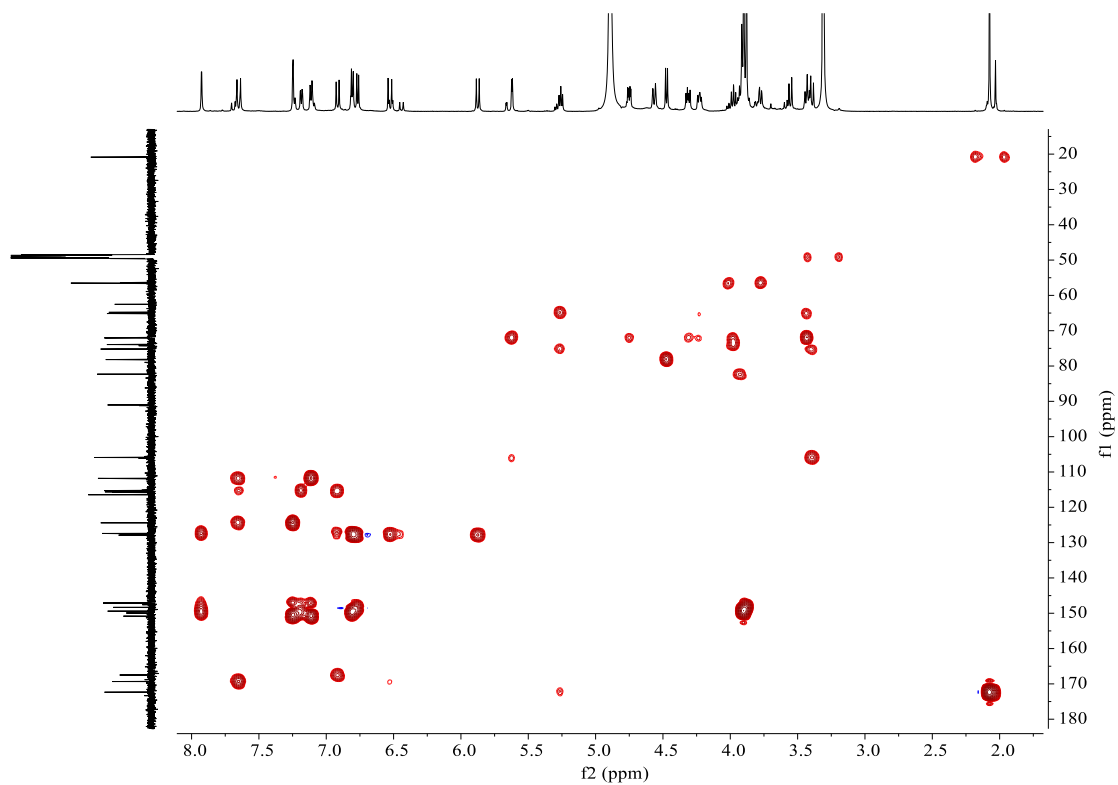

**Figure S162.** HMBC Spectrum of Compound **18** in MeOH- $d_4$



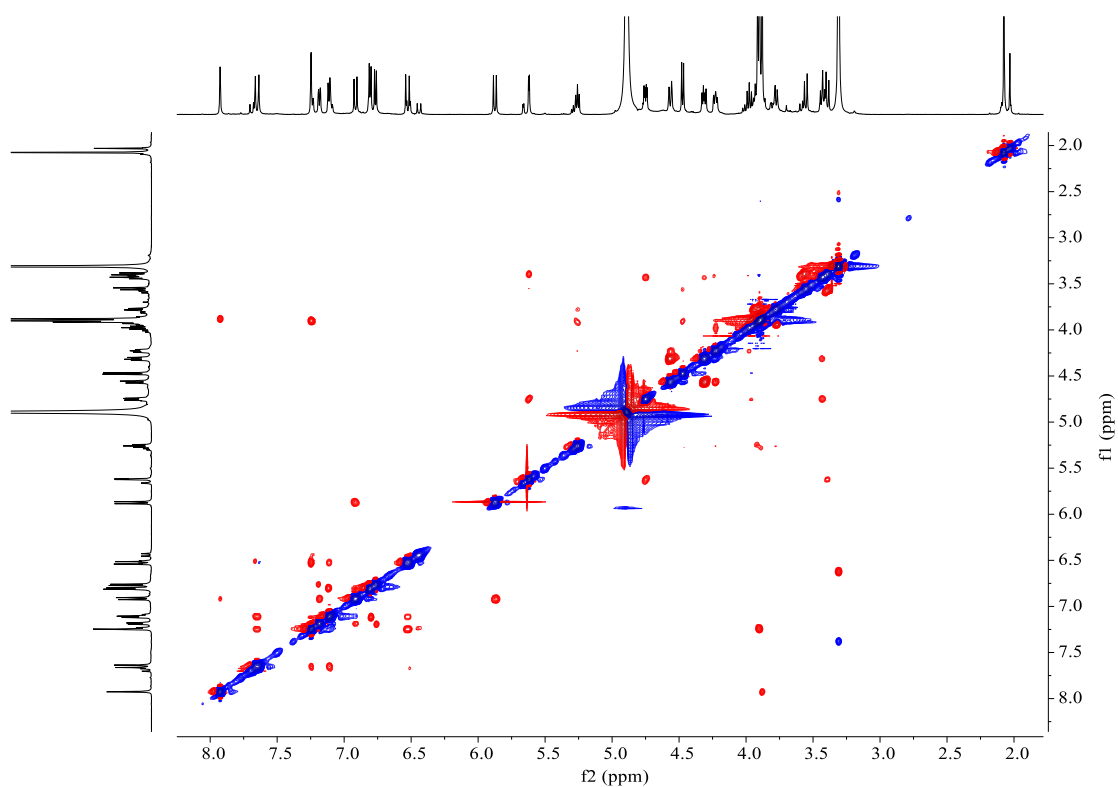

**Figure S163.** NOESY Spectrum of Compound **18** in MeOH- $d_4$

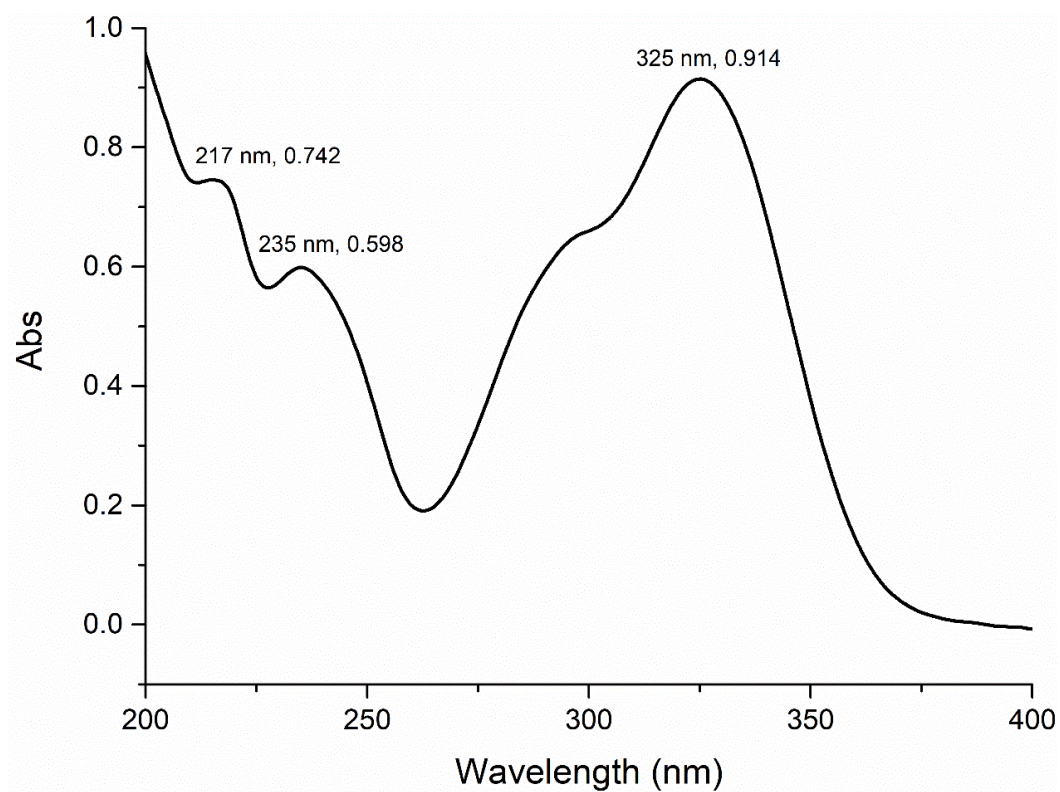

**Figure S164.** UV Spectrum of Compound **19**

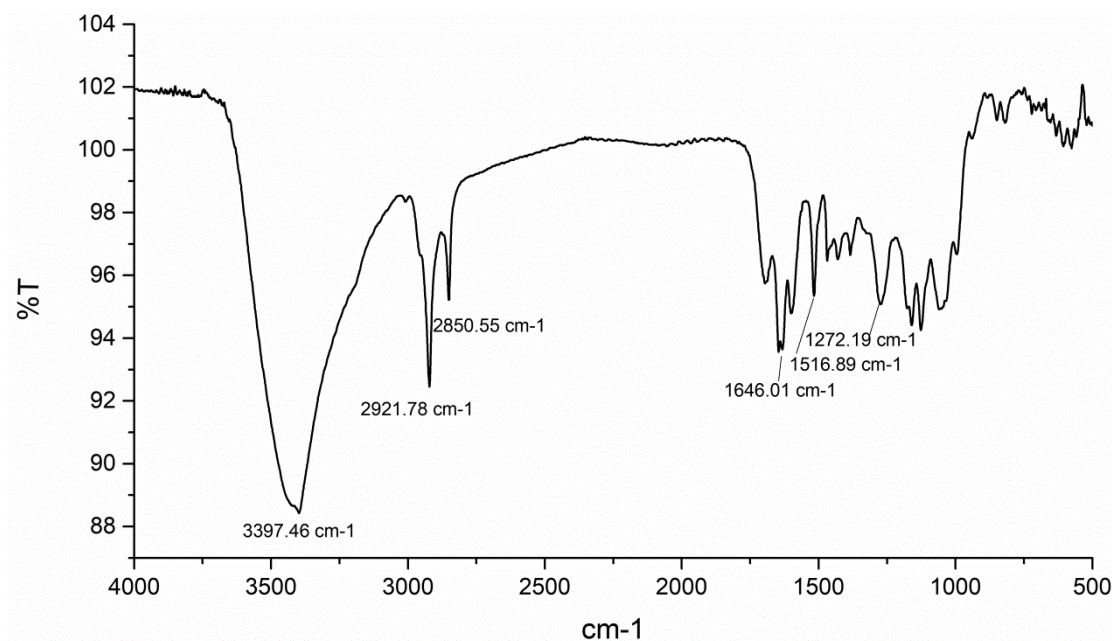

**Figure S165.** IR (KBr disc) Spectrum of Compound **19**

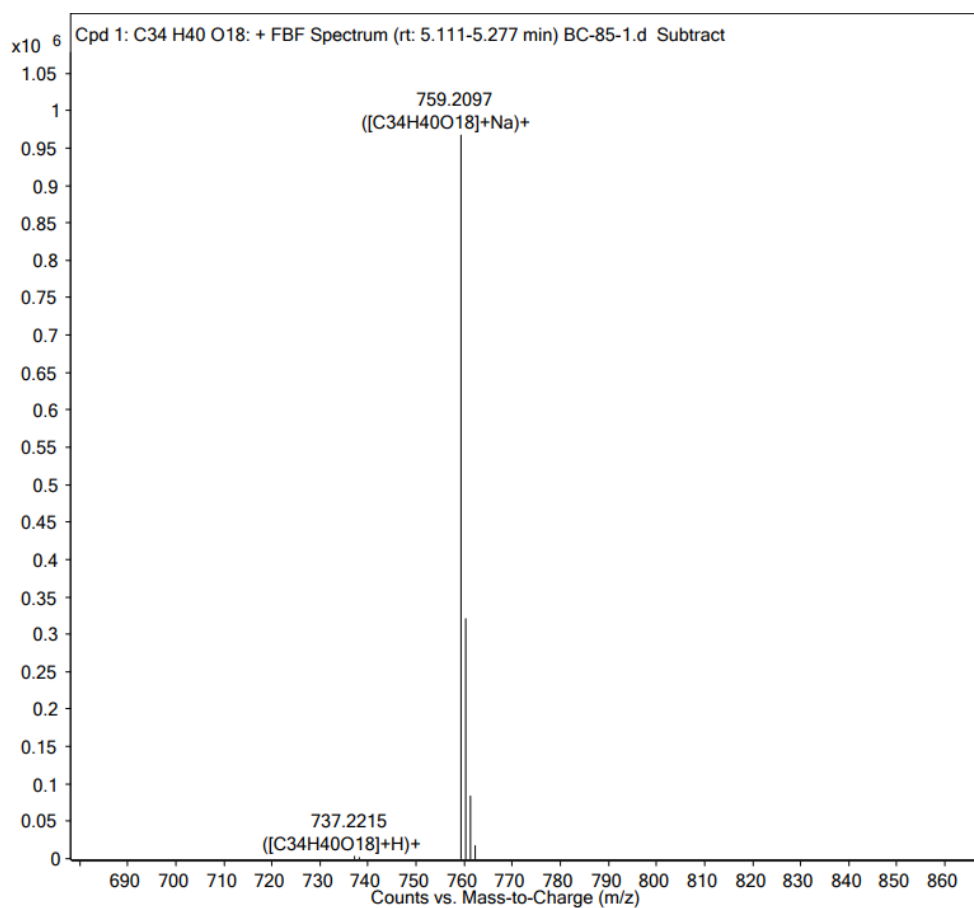

**Figure S166.** (+) HRESIMS Spectrum of Compound **19**

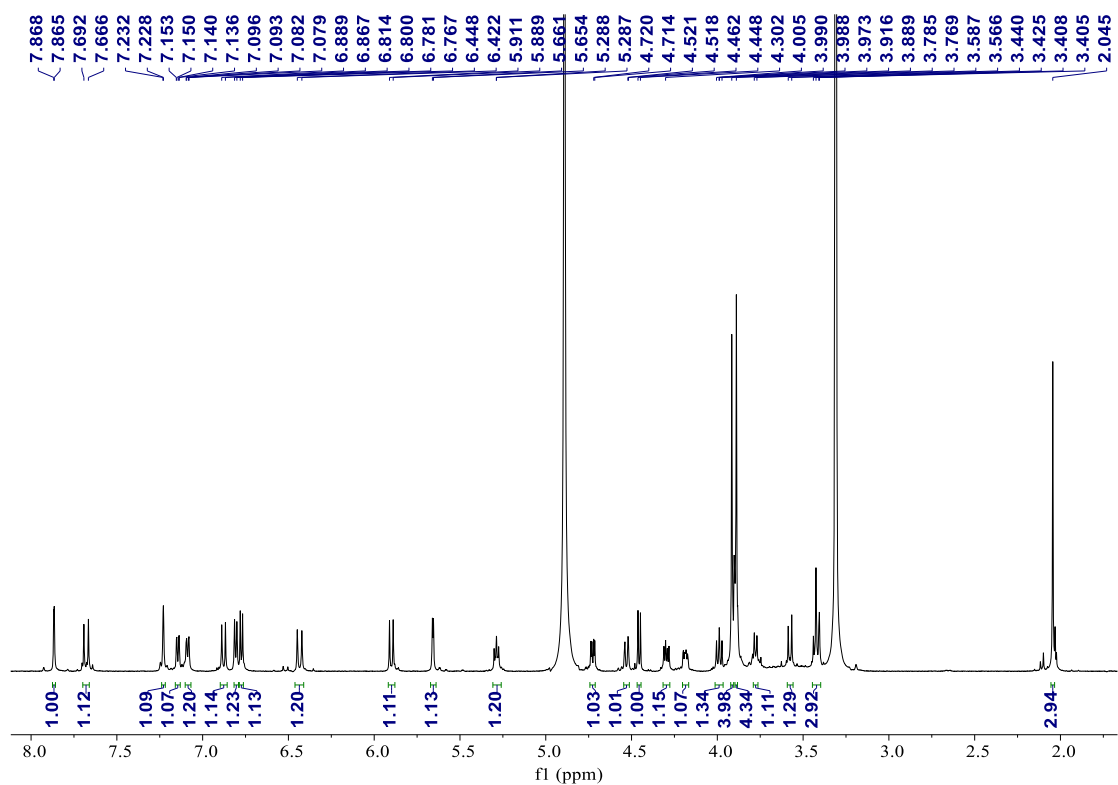

**Figure S167.  $^1\text{H}$  NMR Spectrum of Compound 19 in  $\text{MeOH-}d_4$**

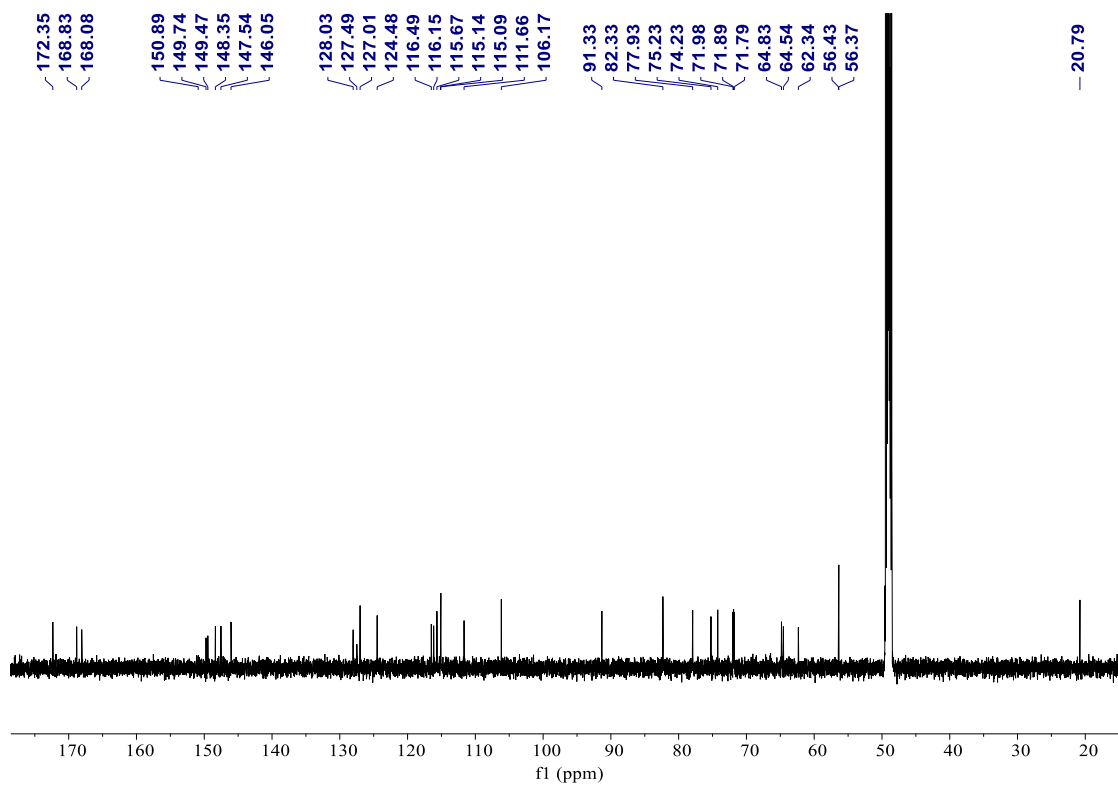

**Figure S168.  $^{13}\text{C}$  NMR Spectrum of Compound 19 in  $\text{MeOH-}d_4$**

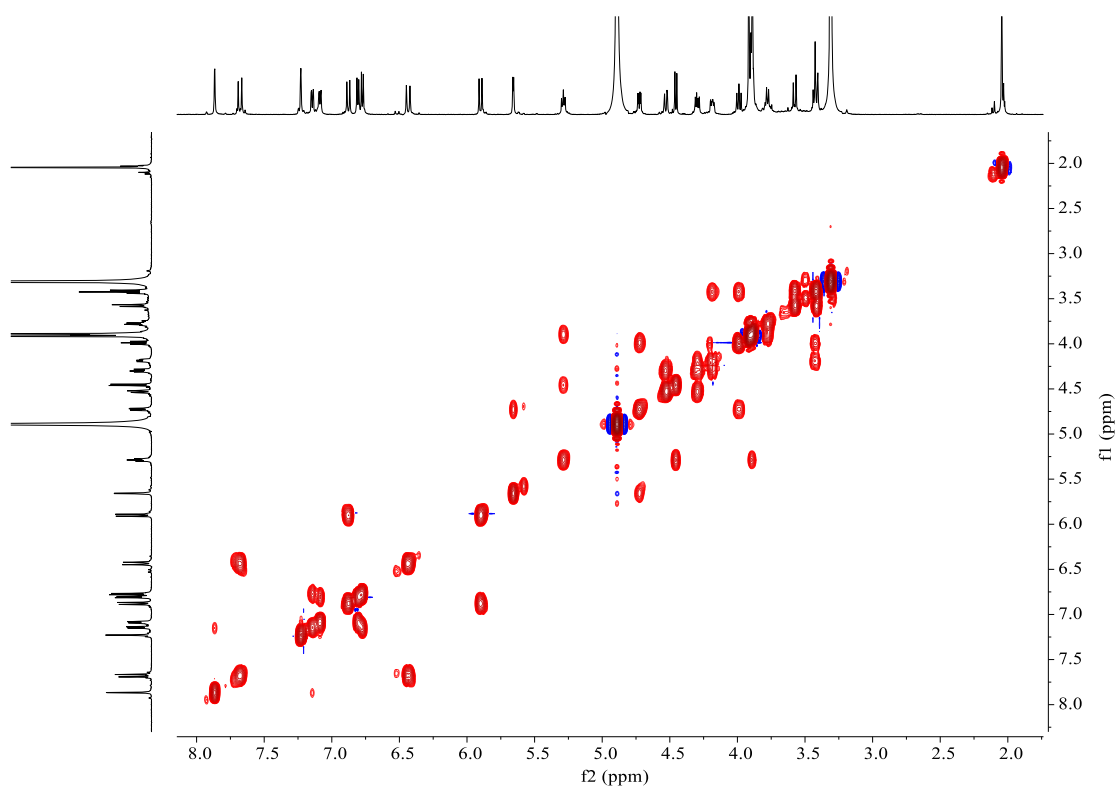

**Figure S169.**  $^1\text{H}$ - $^1\text{H}$  COSY Spectrum of Compound **19** in  $\text{MeOH-}d_4$

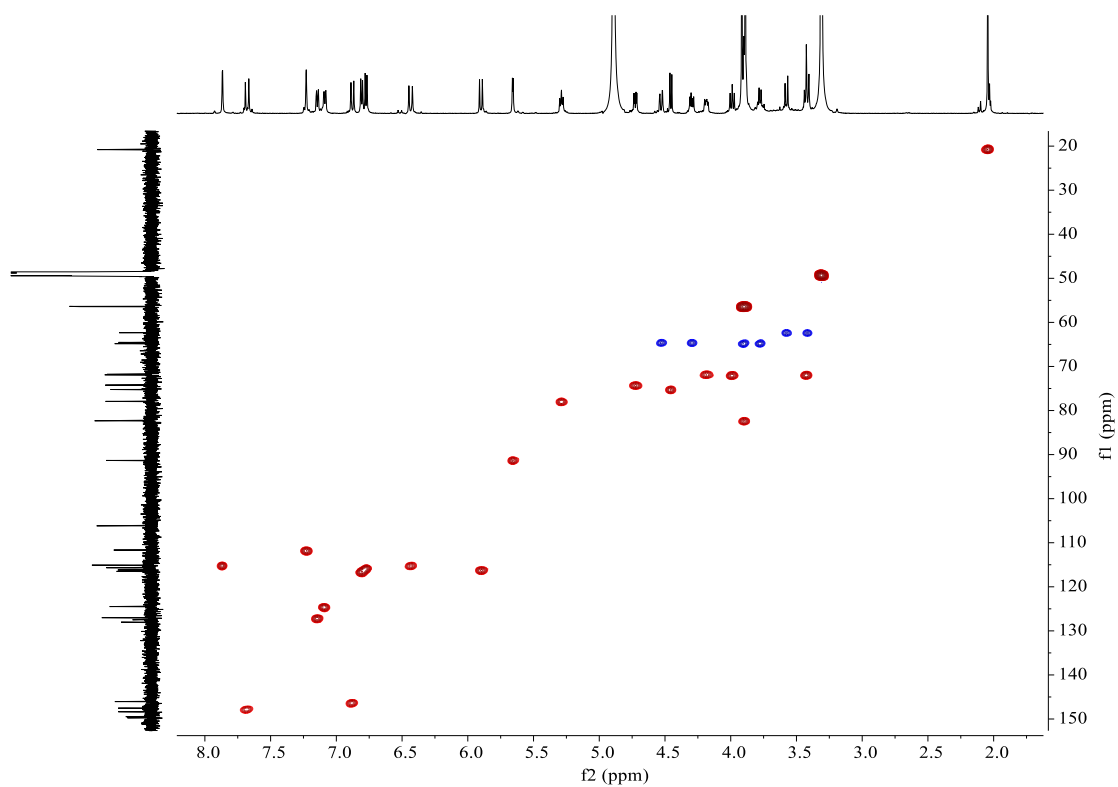

**Figure S170.** HSQC Spectrum of Compound **19** in  $\text{MeOH-}d_4$

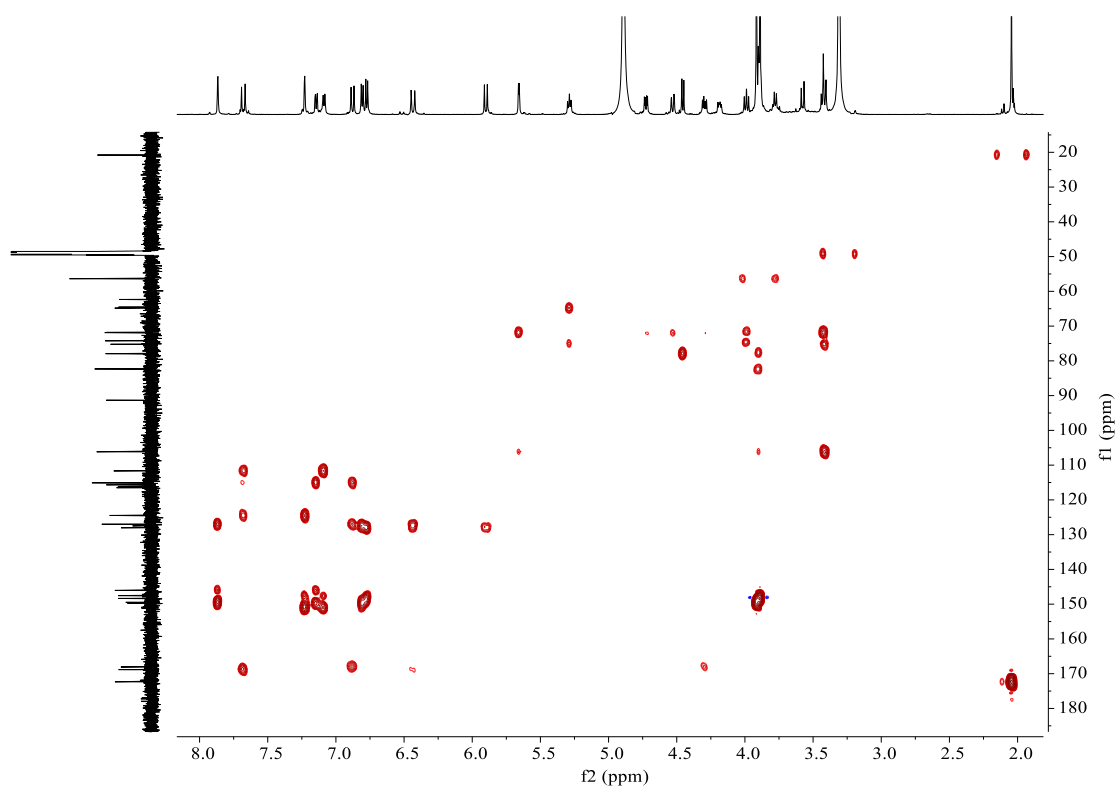

**Figure S171.** HMBC Spectrum of Compound **19** in MeOH- $d_4$

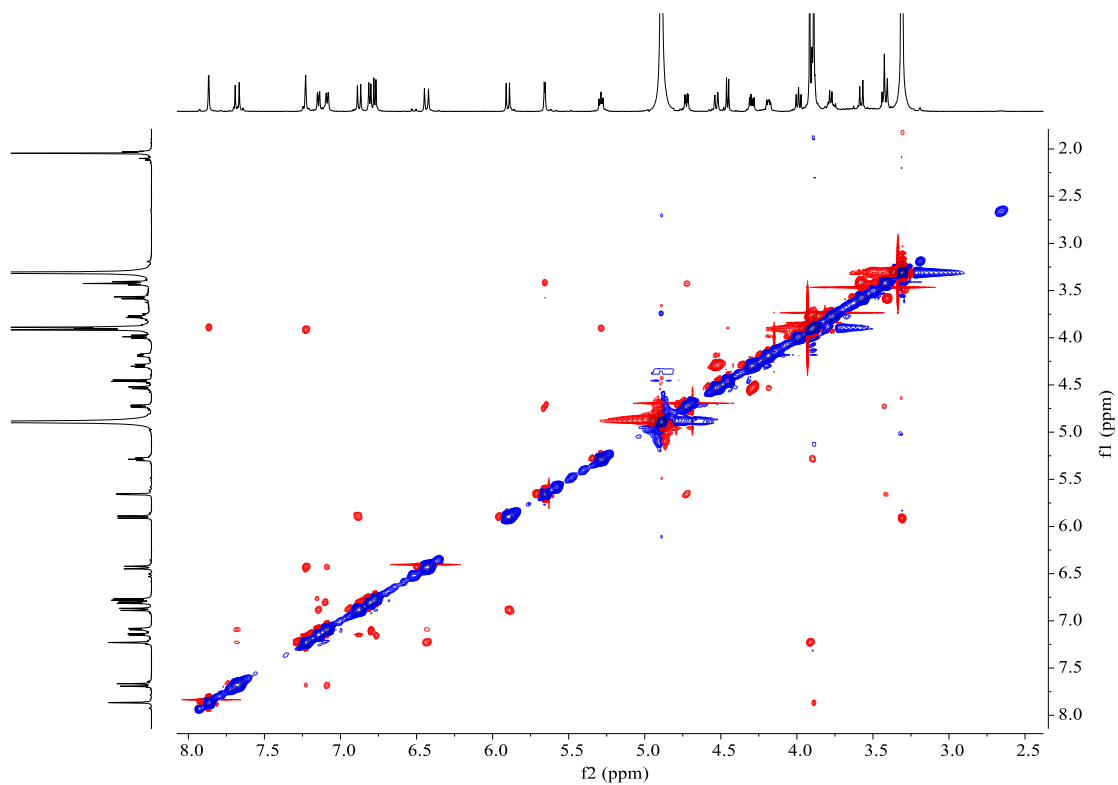

**Figure S172.** NOESY Spectrum of Compound **19** in MeOH- $d_4$

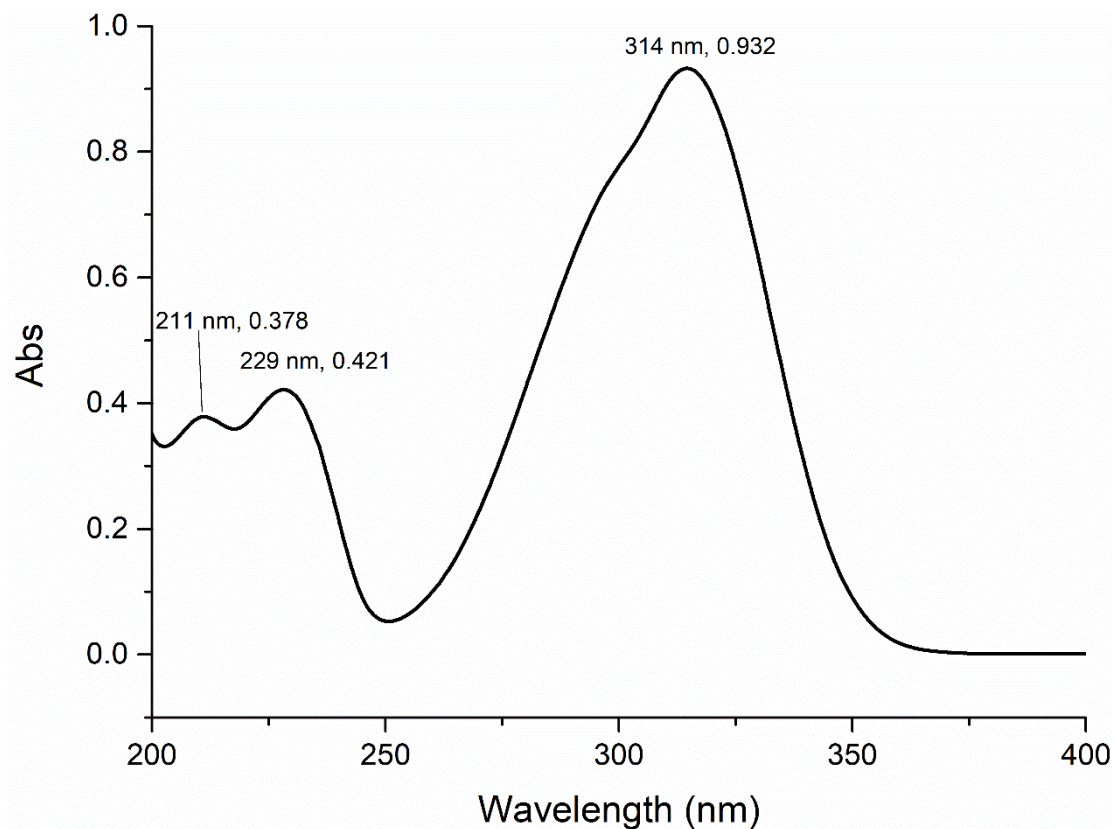

**Figure S173.** UV Spectrum of Compound **20**

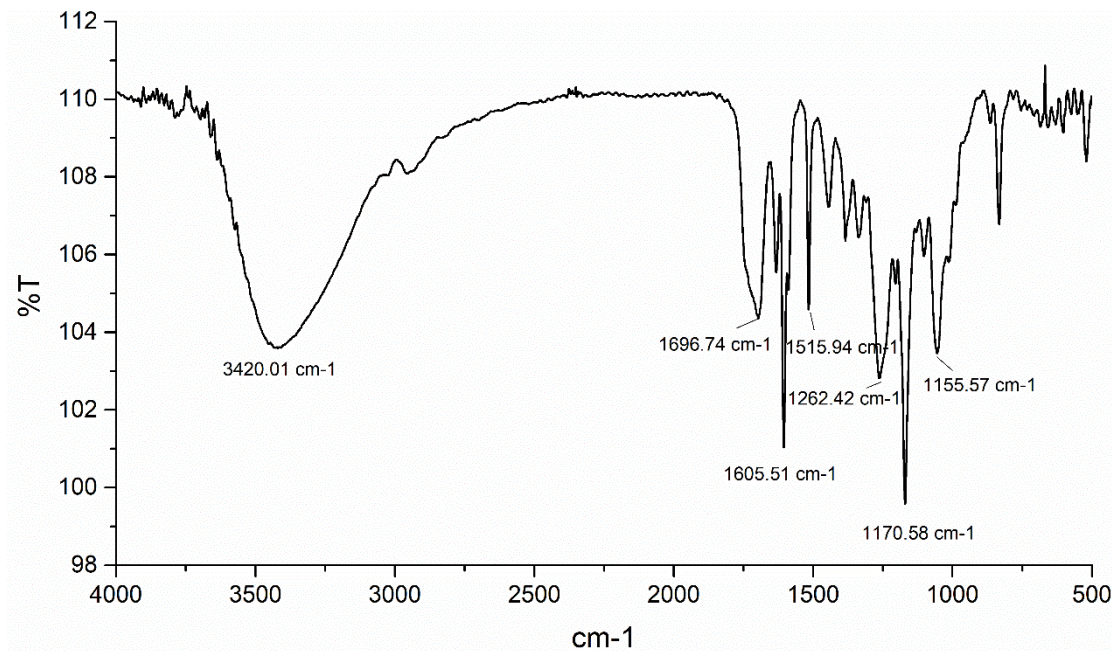

**Figure S174.** IR (KBr disc) Spectrum of Compound **20**



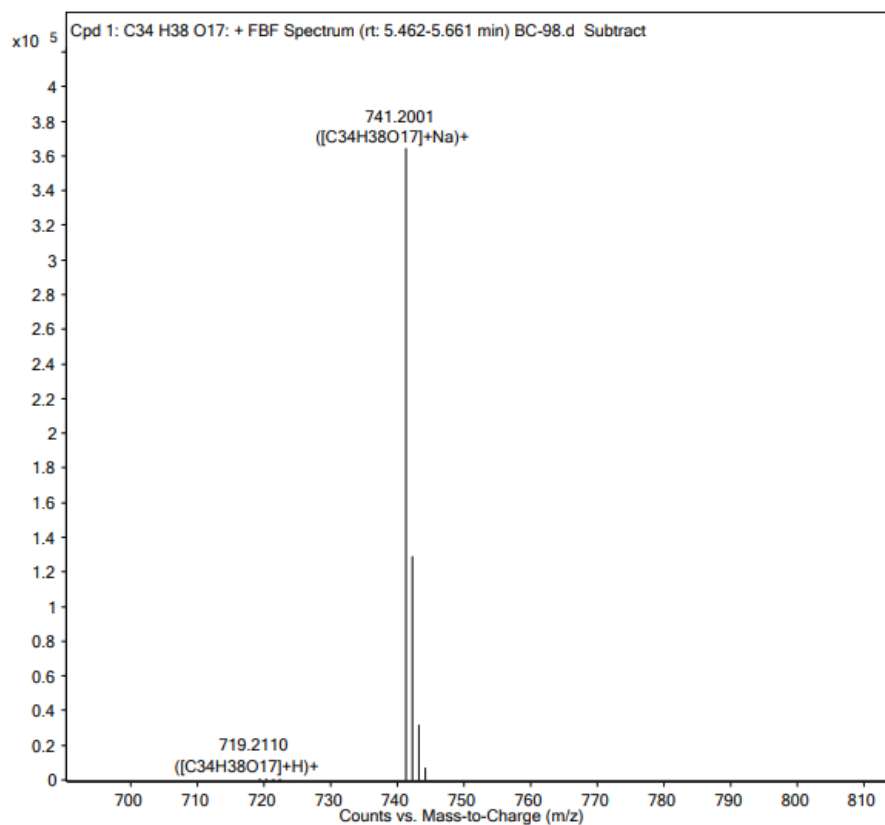

**Figure S175.** (+) HRESIMS Spectrum of Compound **20**

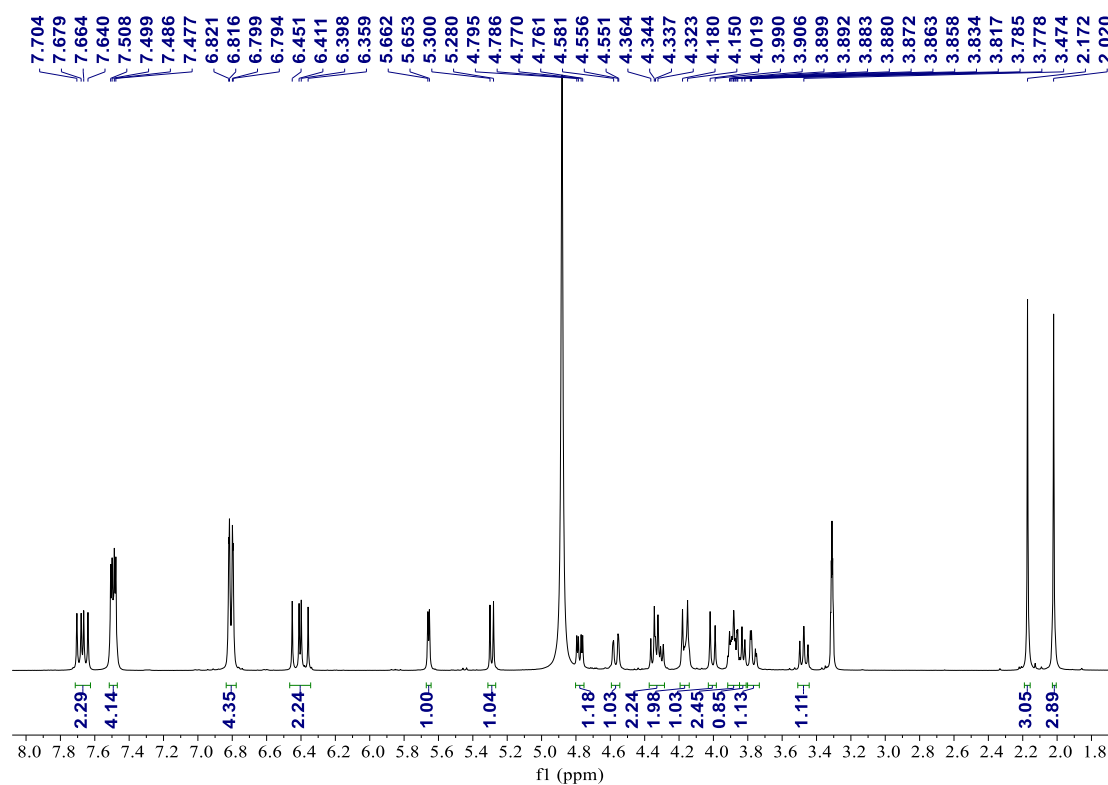

**Figure S176.** <sup>1</sup>H NMR Spectrum of Compound **20** in MeOH-*d*<sub>4</sub>

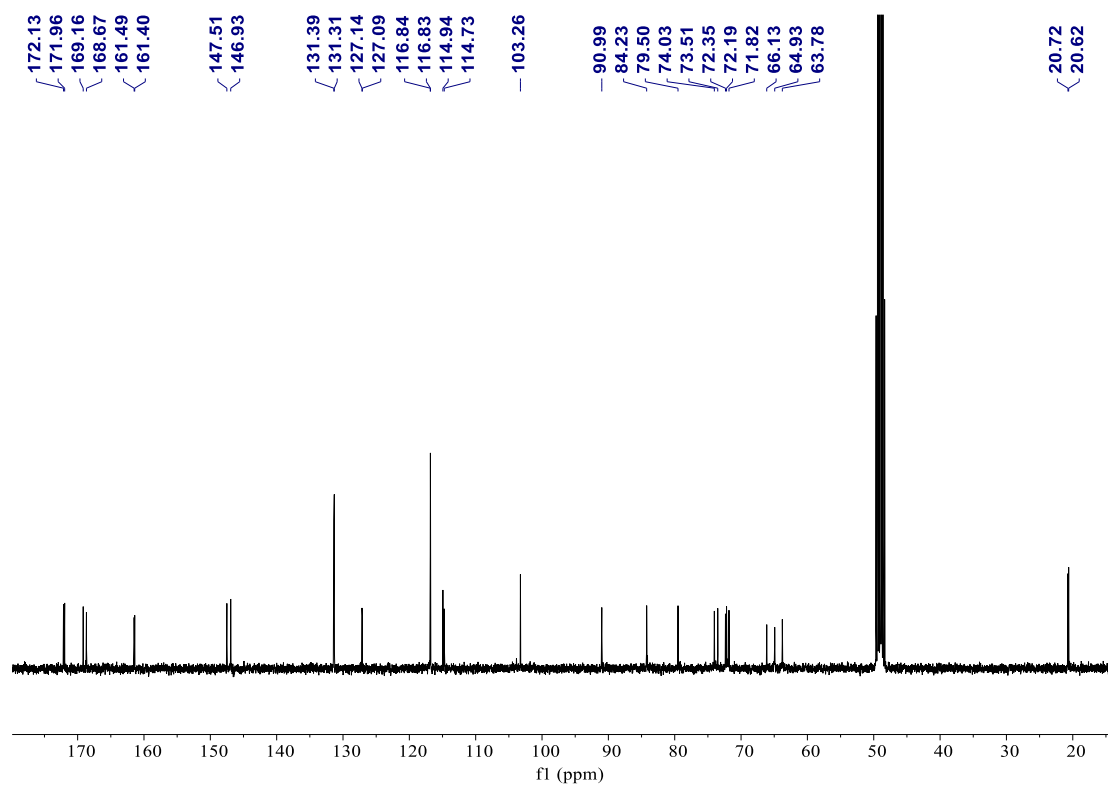

**Figure S177.** <sup>13</sup>C NMR Spectrum of Compound **20** in MeOH-*d*<sub>4</sub>

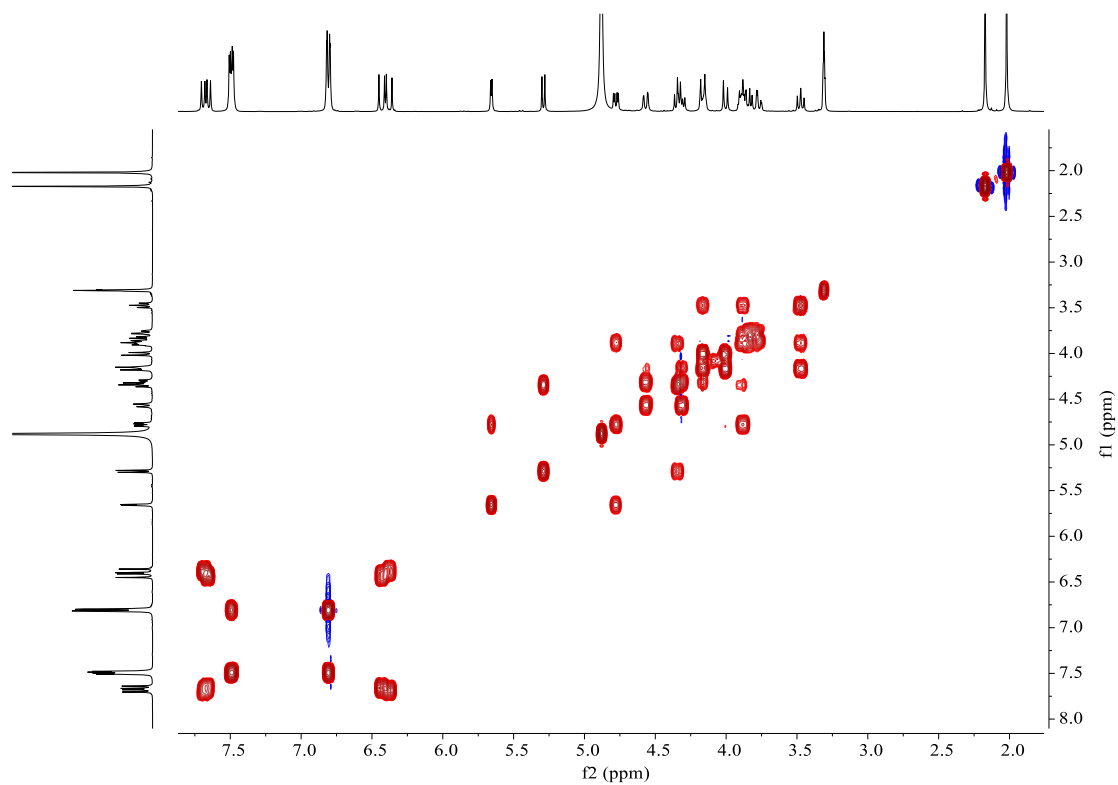

**Figure S178.** <sup>1</sup>H-<sup>1</sup>H COSY Spectrum of Compound **20** in MeOH-*d*<sub>4</sub>



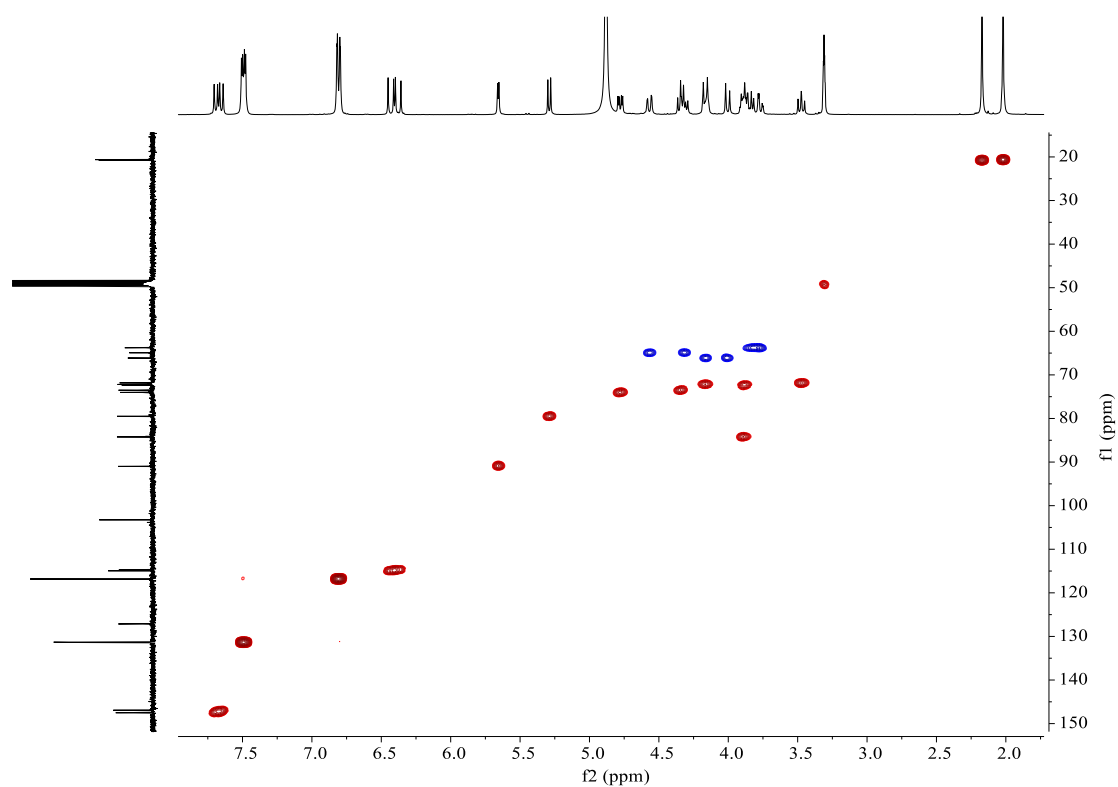

**Figure S179.** HSQC Spectrum of Compound **20** in MeOH- $d_4$

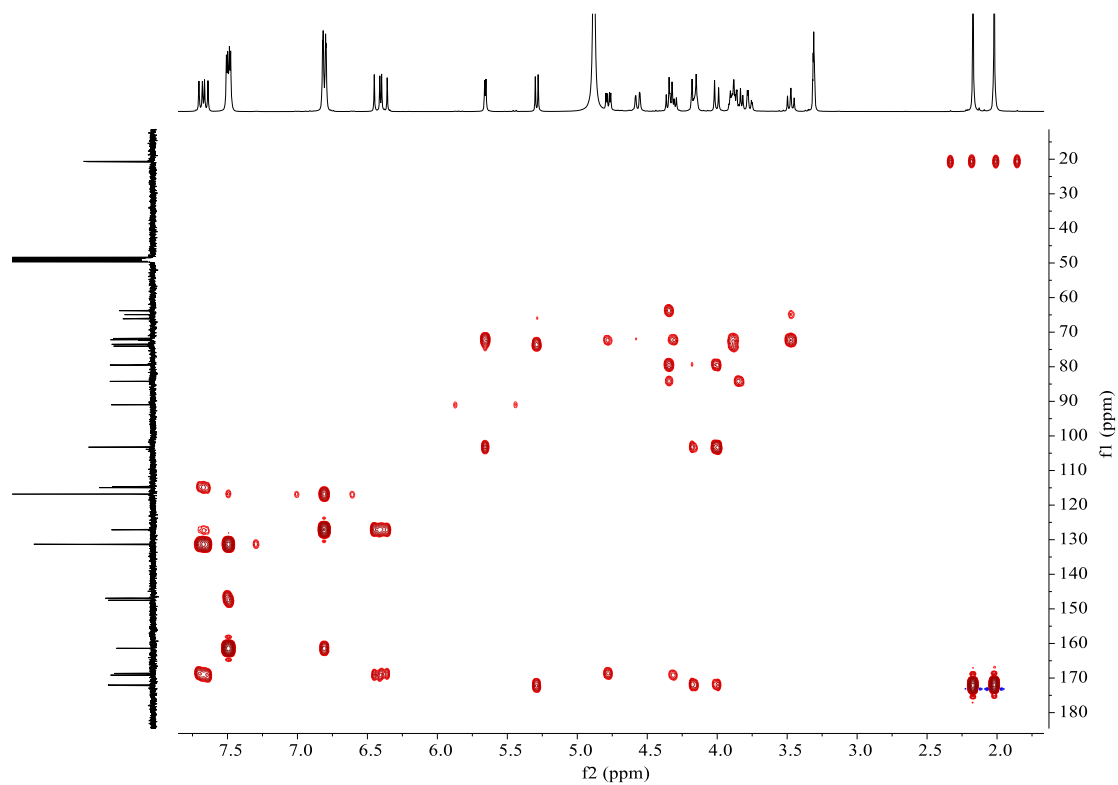

**Figure S180.** HMBC Spectrum of Compound **20** in MeOH- $d_4$

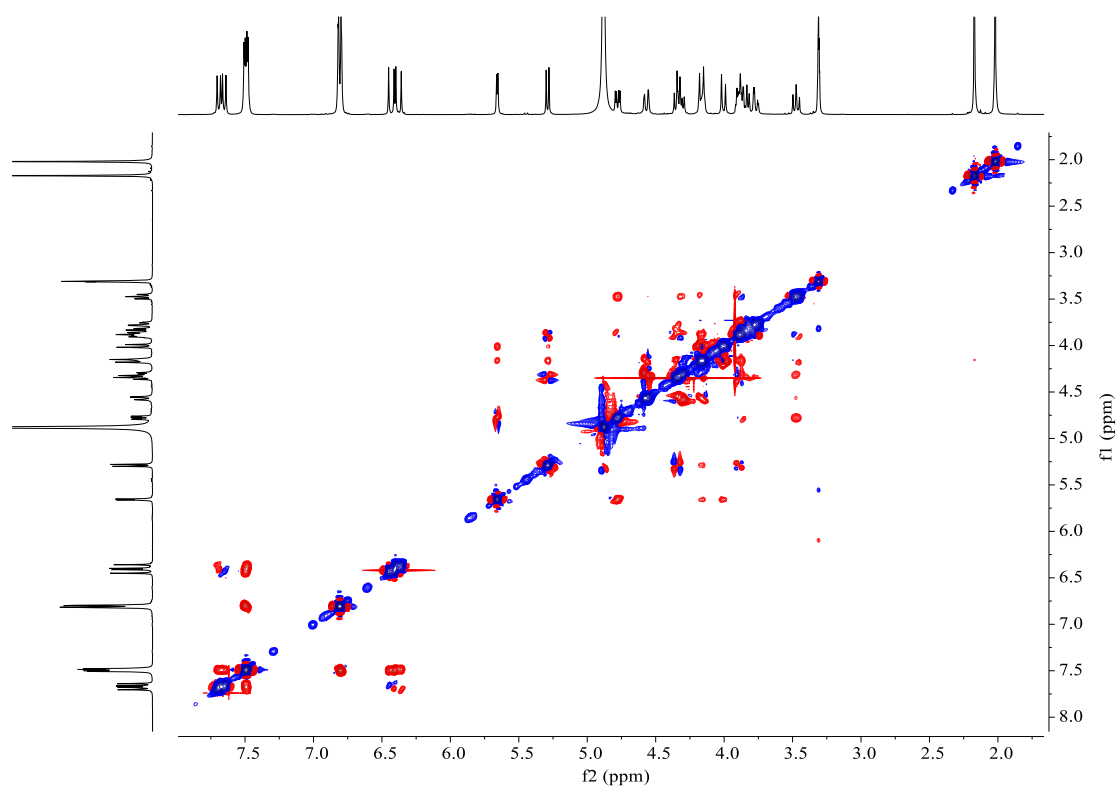

**Figure S181.** NOESY Spectrum of Compound **20** in MeOH- $d_4$

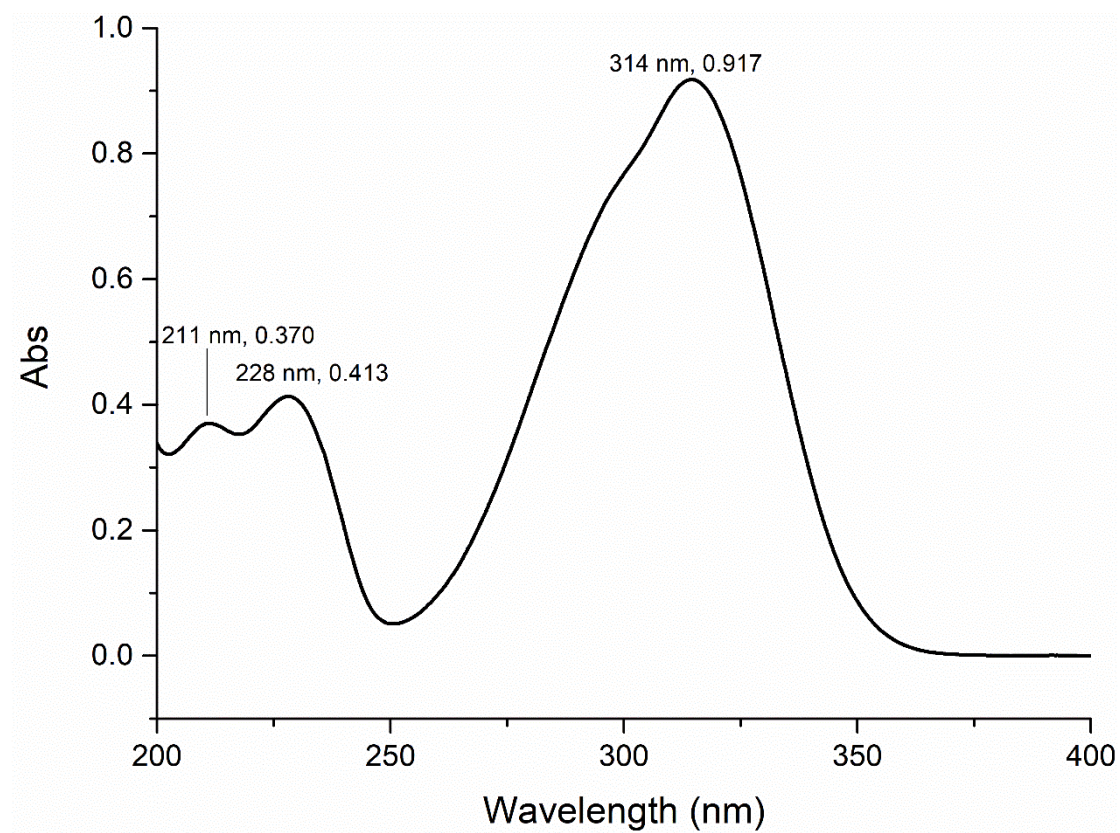

**Figure S182.** UV Spectrum of Compound **21**

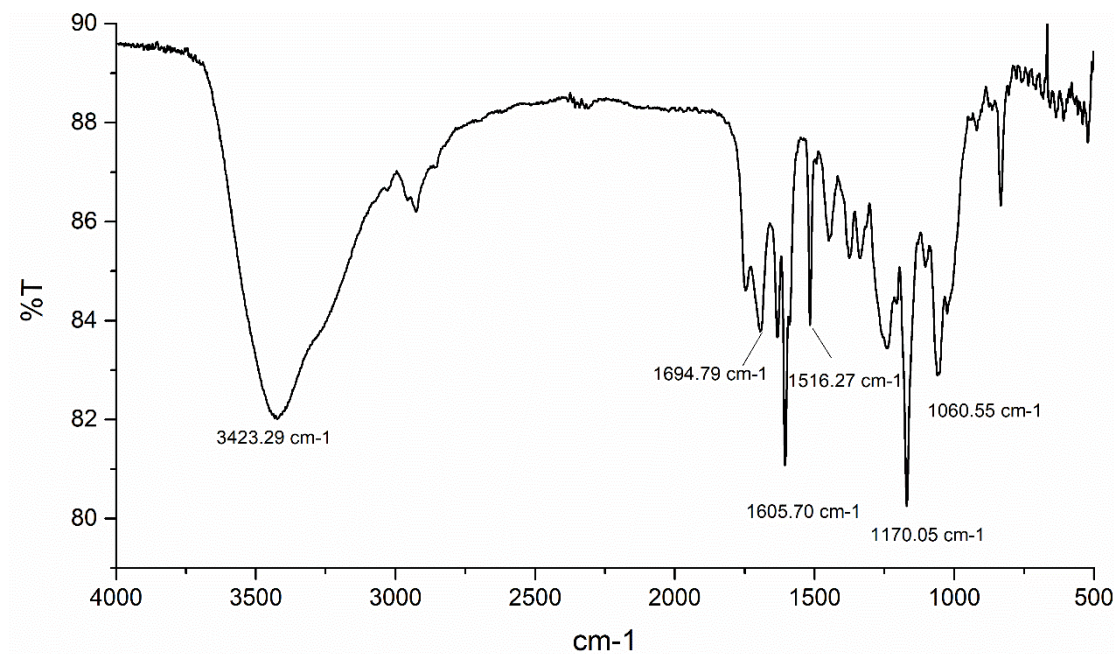

**Figure S183.** IR (KBr disc) Spectrum of Compound **21**

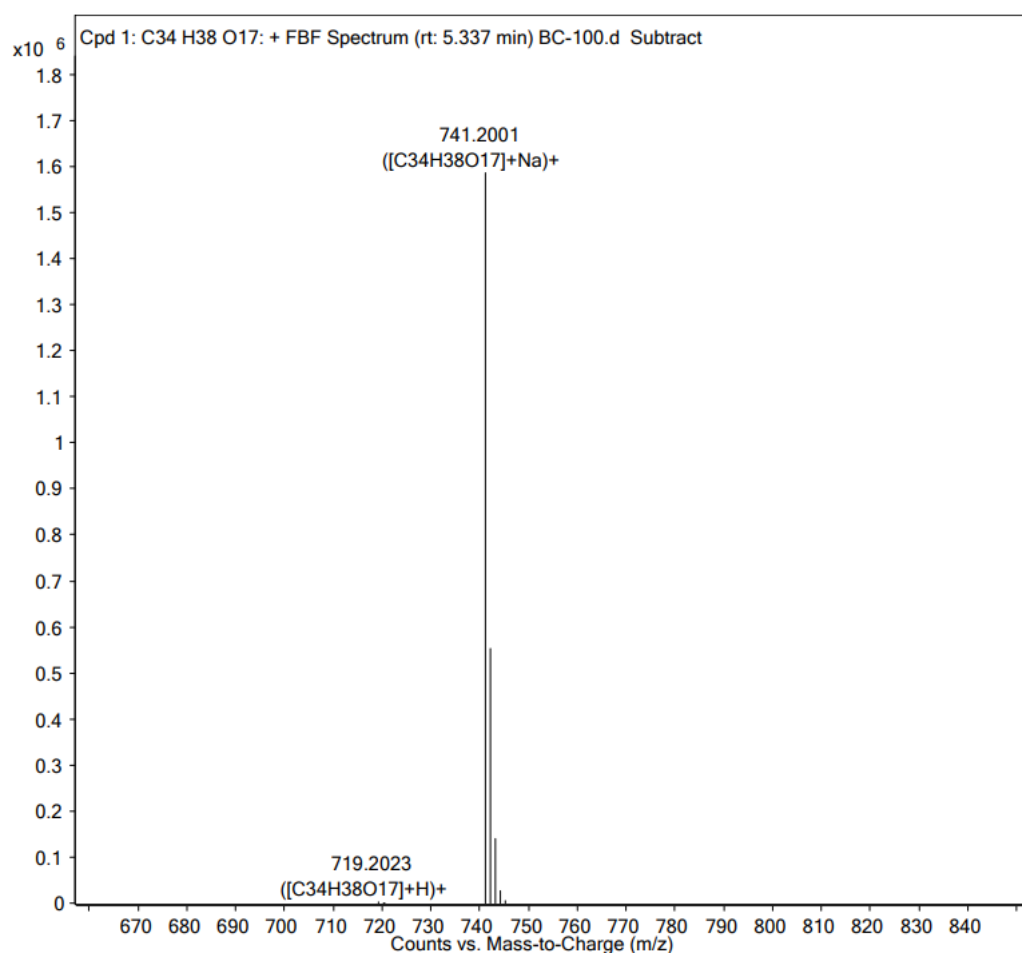

**Figure S184.** (+) HRESIMS Spectrum of Compound **21**

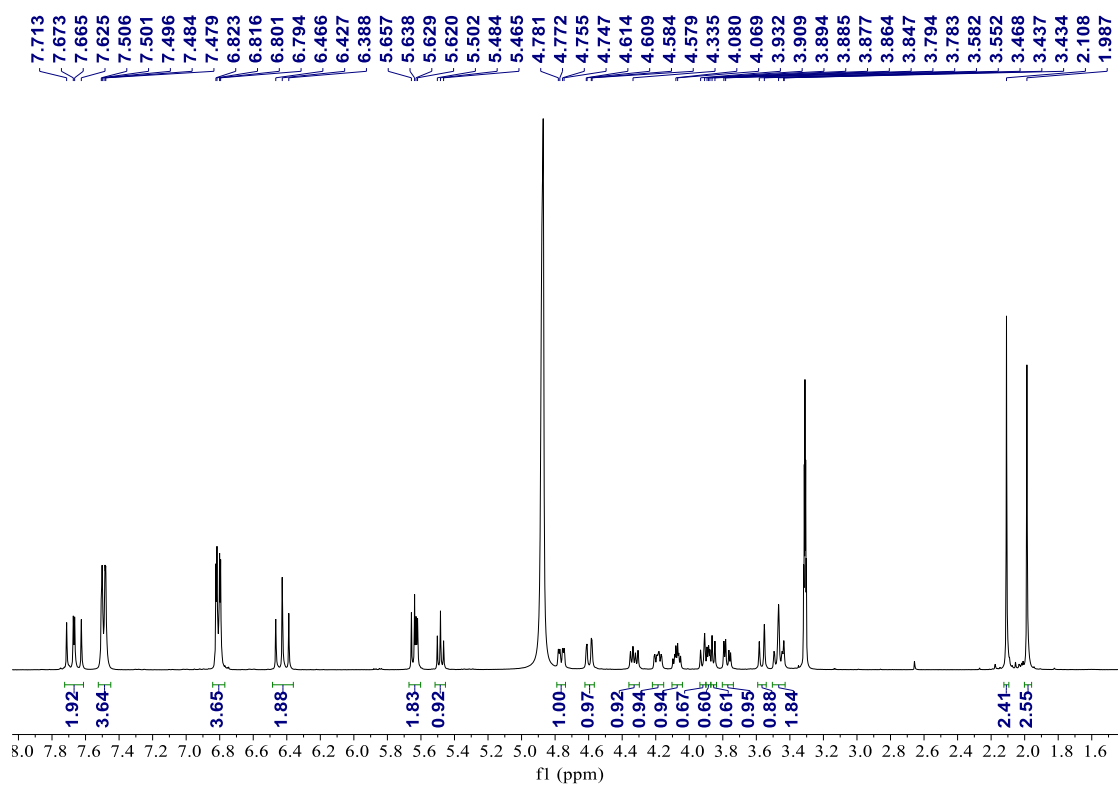

**Figure S185.** <sup>1</sup>H NMR Spectrum of Compound **21** in MeOH-*d*<sub>4</sub>

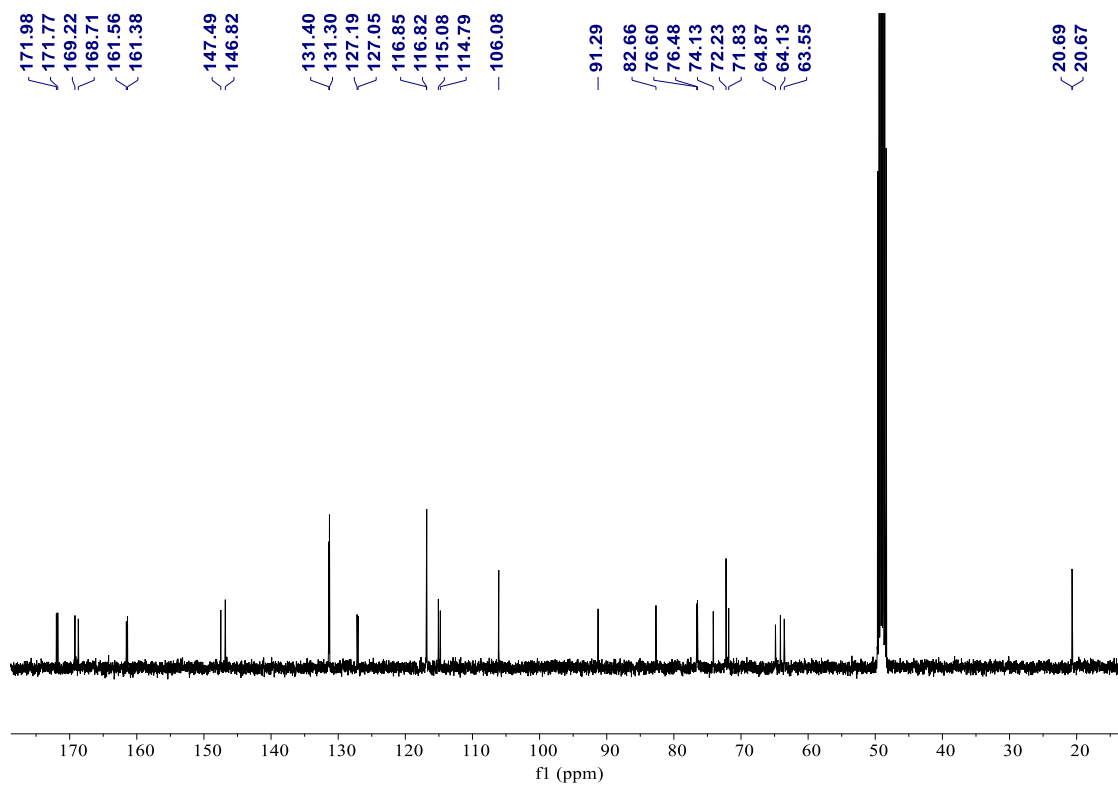

**Figure S186.** <sup>13</sup>C NMR Spectrum of Compound **21** in MeOH-*d*<sub>4</sub>

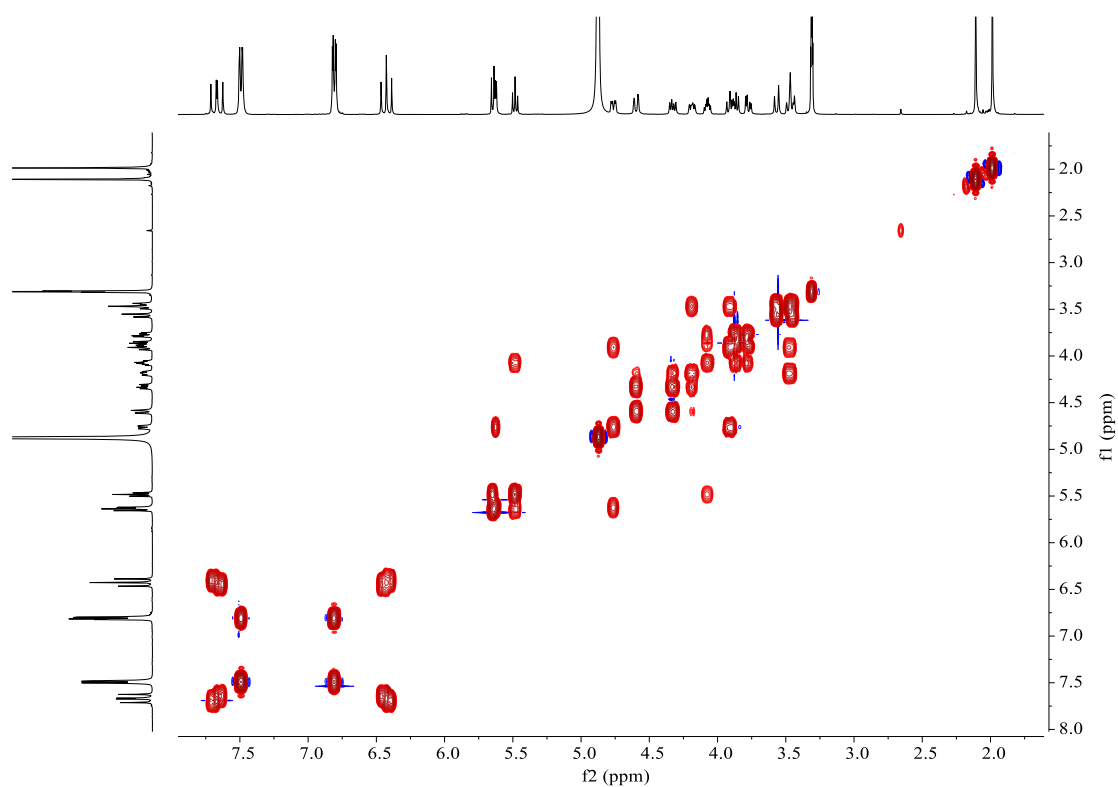

**Figure S187.**  $^1\text{H}$ - $^1\text{H}$  COSY Spectrum of Compound **21** in  $\text{MeOH-}d_4$

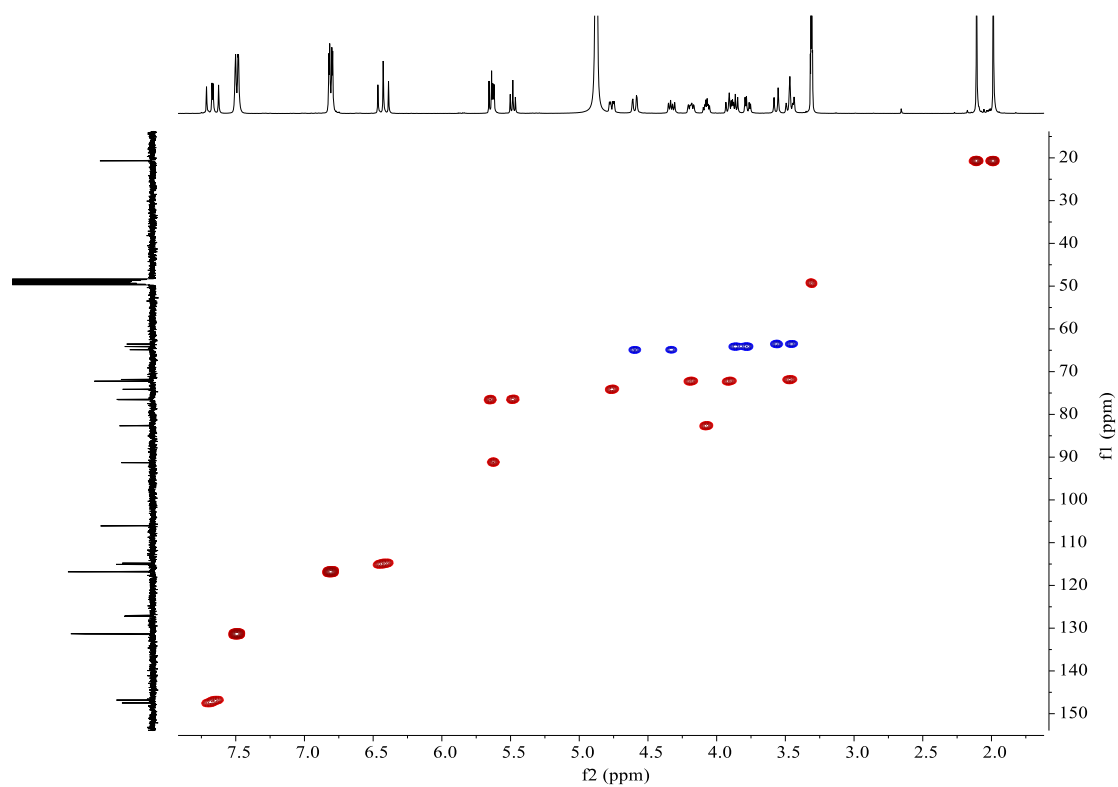

**Figure S188.** HSQC Spectrum of Compound **21** in  $\text{MeOH-}d_4$

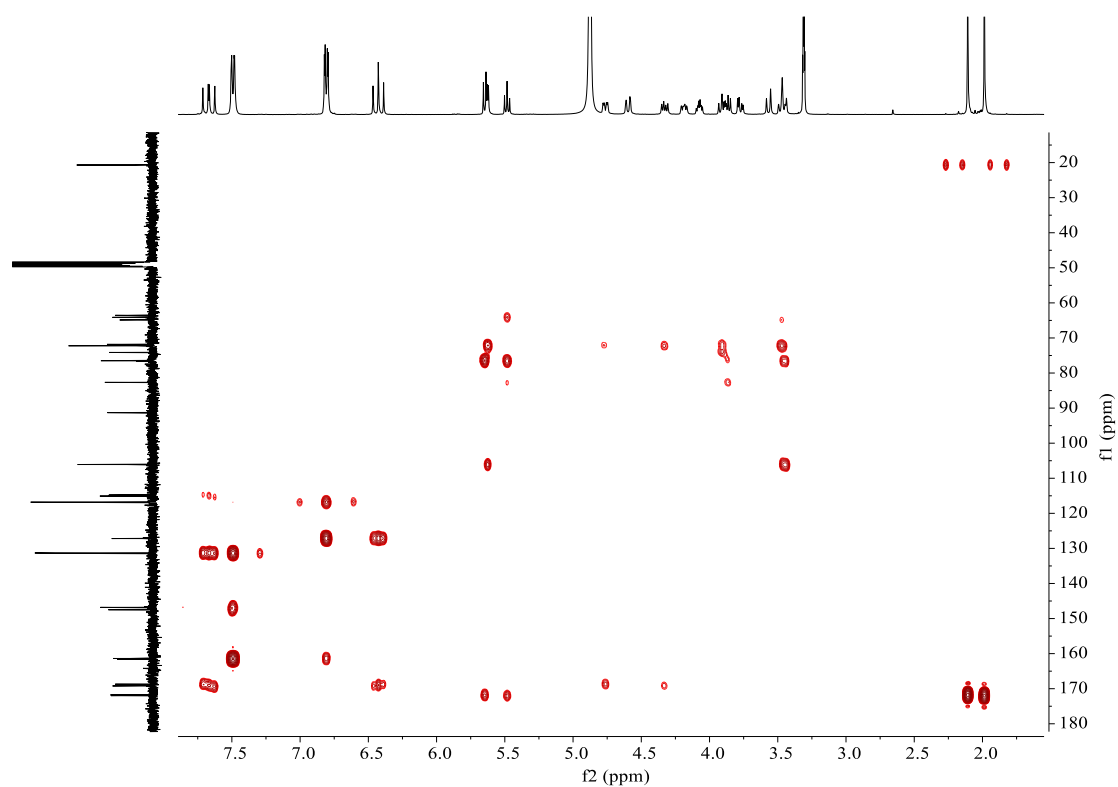

**Figure S189.** HMBC Spectrum of Compound **21** in  $\text{MeOH-}d_4$

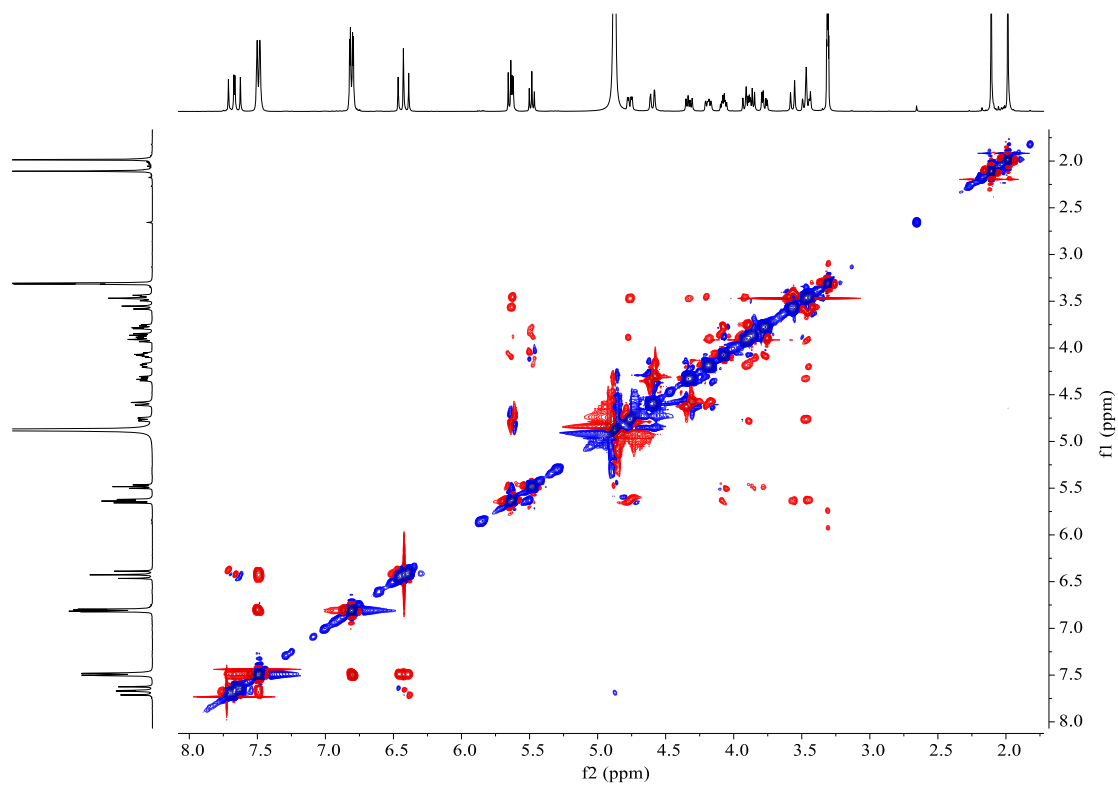

**Figure S190.** NOESY Spectrum of Compound **21** in  $\text{MeOH-}d_4$

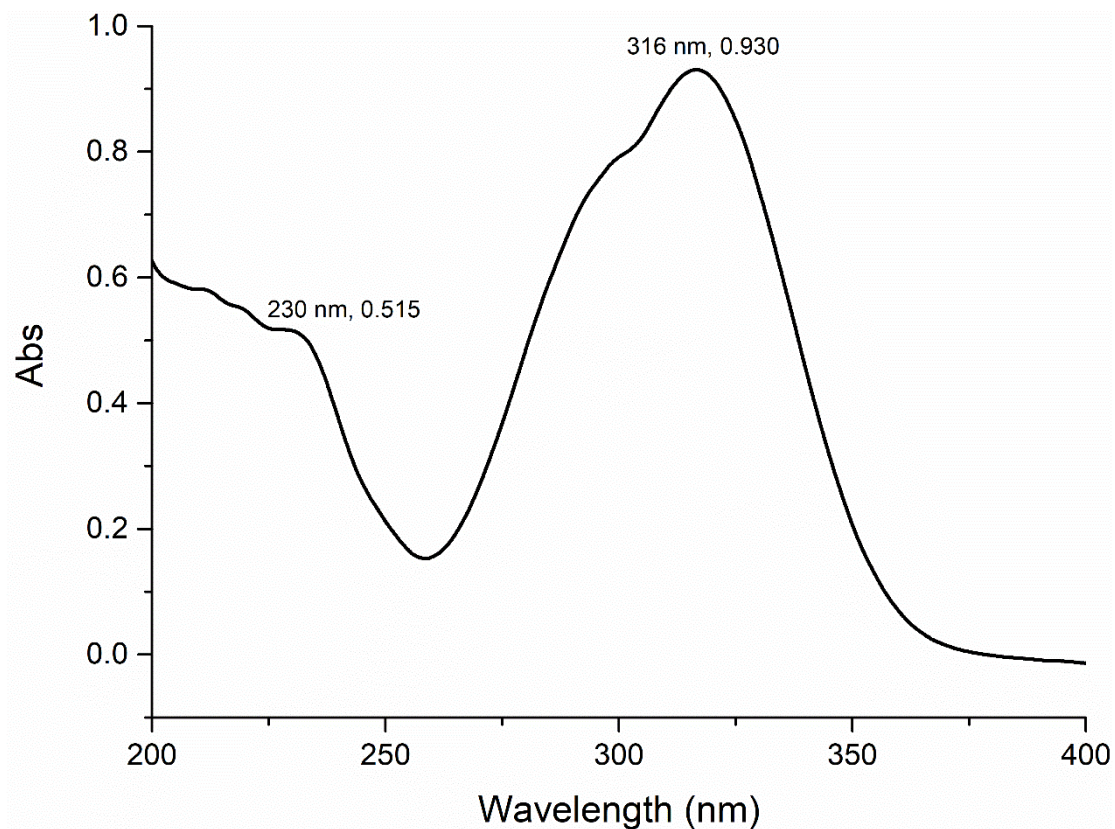

**Figure S191.** UV Spectrum of Compound **22**

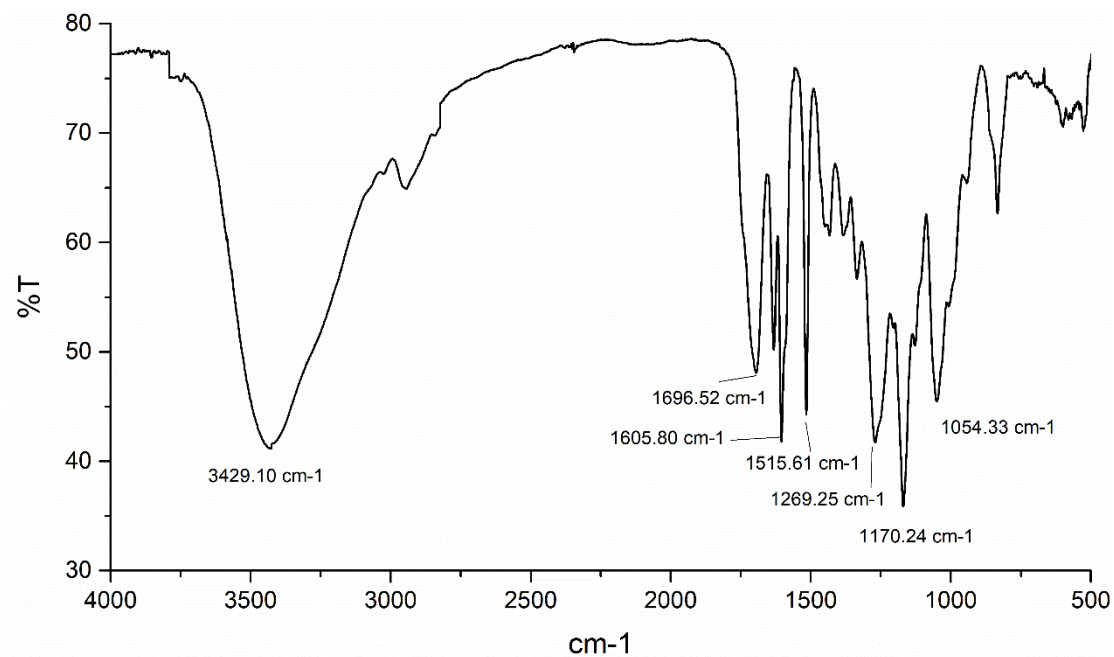

**Figure S192.** IR (KBr disc) Spectrum of Compound **22**



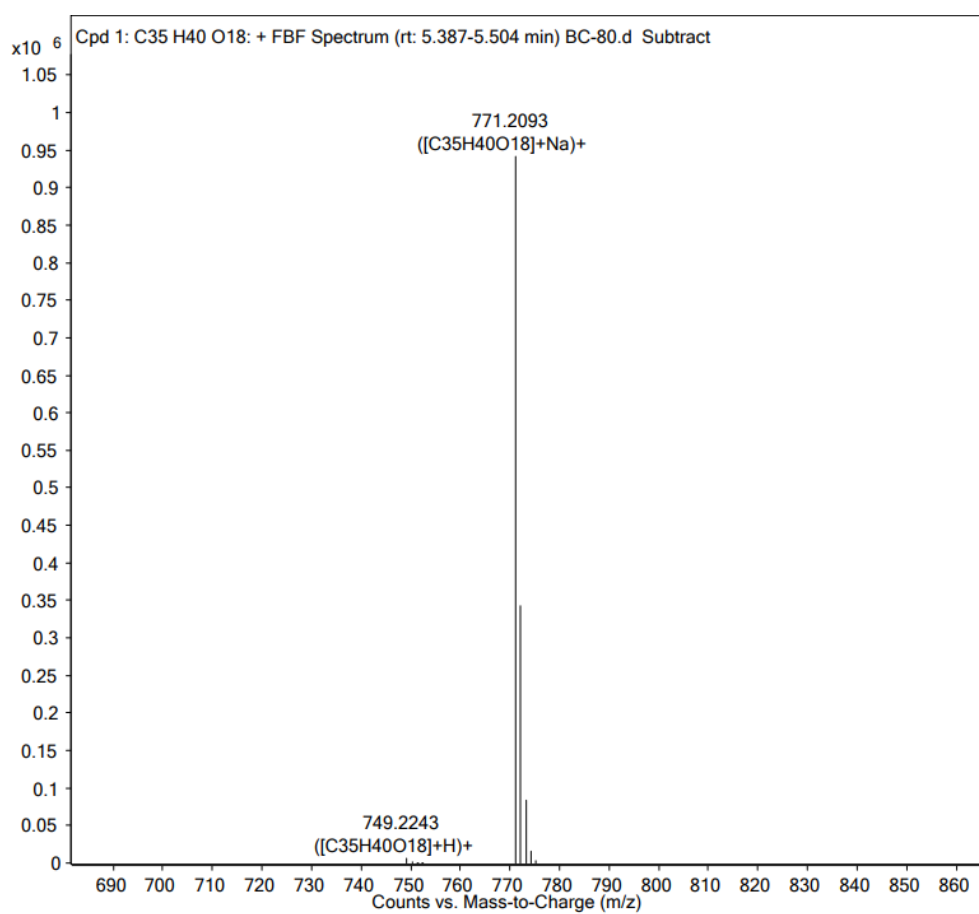

**Figure S193. (+) HRESIMS Spectrum of Compound 22**

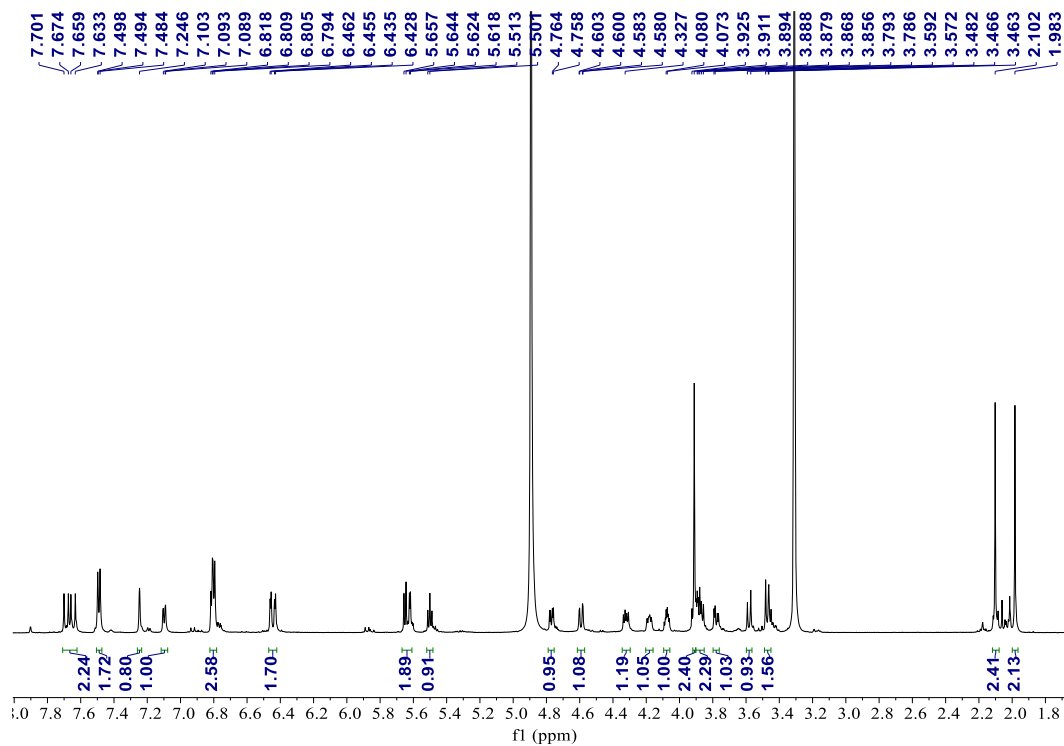

**Figure S194.  $^1H$  NMR Spectrum of Compound 22 in  $MeOH-d_4$**



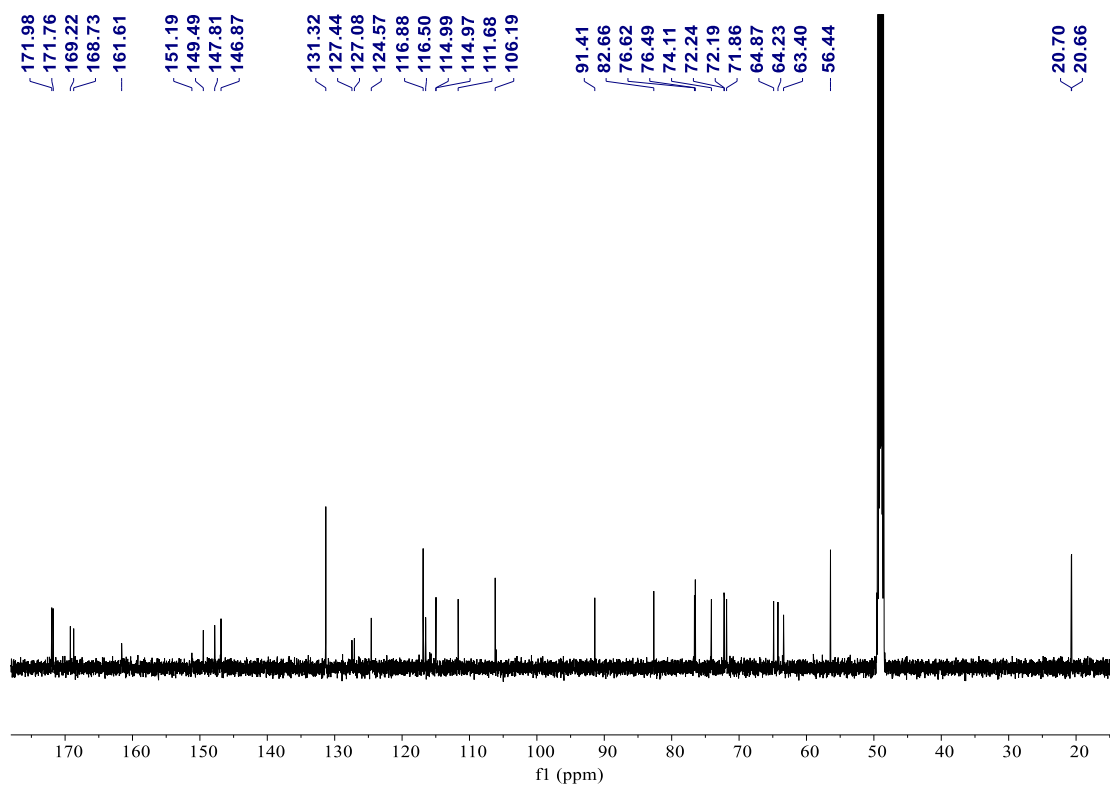

**Figure S195.**  $^{13}\text{C}$  NMR Spectrum of Compound **22** in  $\text{MeOH-}d_4$

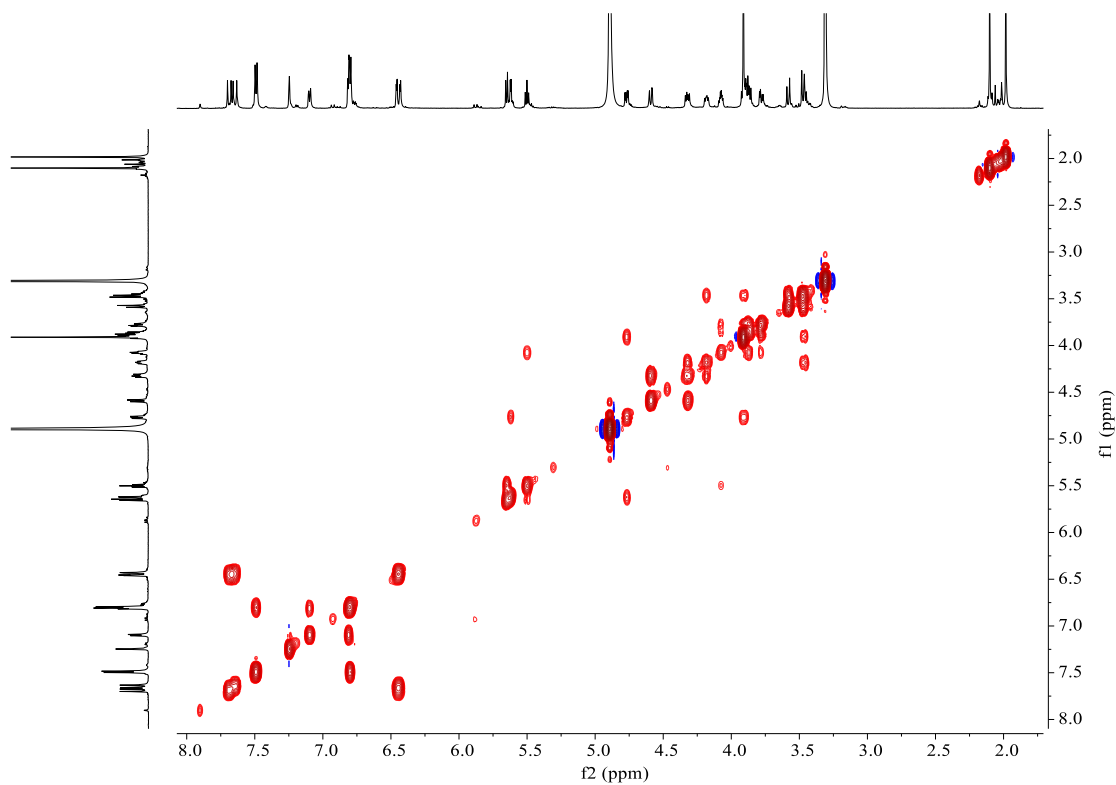

**Figure S196.**  $^1\text{H}$ – $^1\text{H}$  COSY Spectrum of Compound **22** in  $\text{MeOH-}d_4$

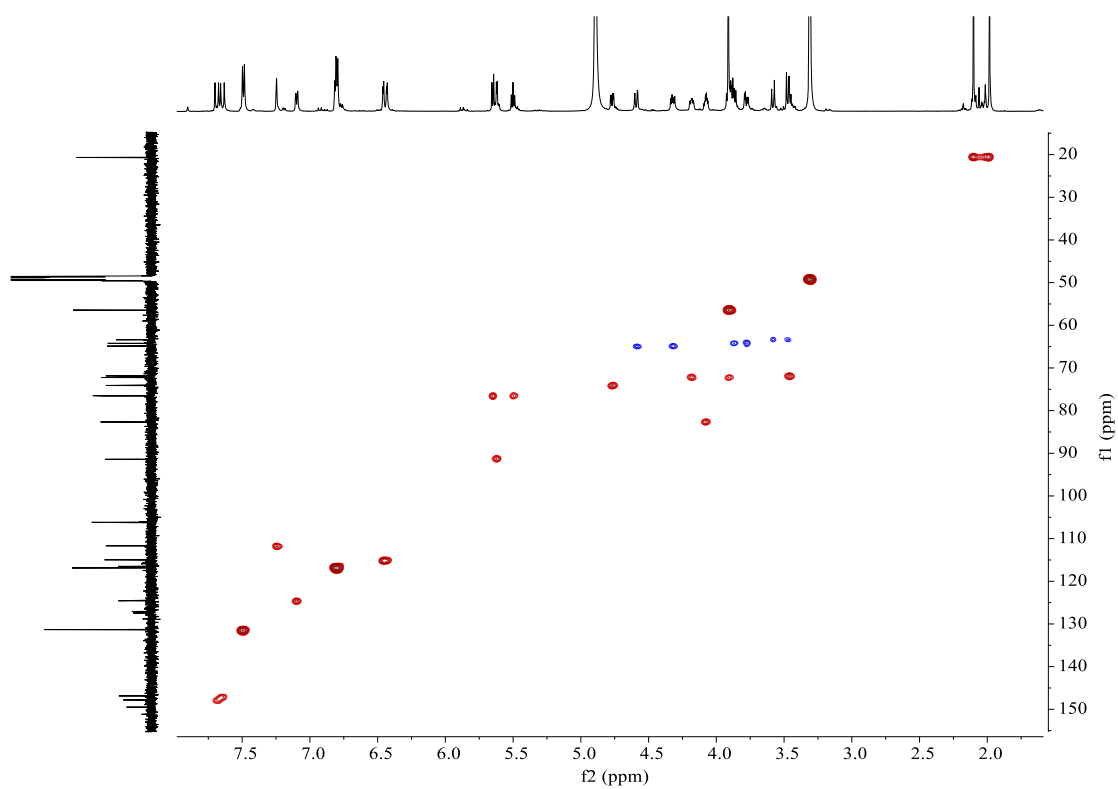

**Figure S197.** HSQC Spectrum of Compound **22** in MeOH- $d_4$

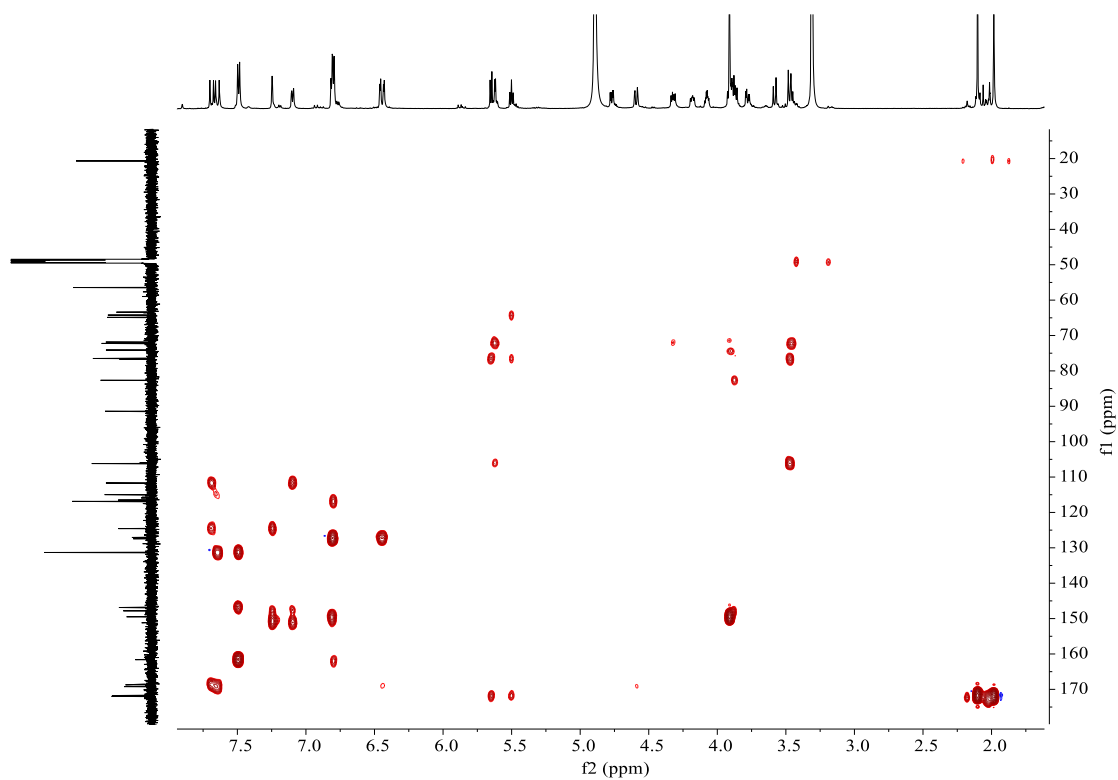

**Figure S198.** HMBC Spectrum of Compound **22** in MeOH- $d_4$

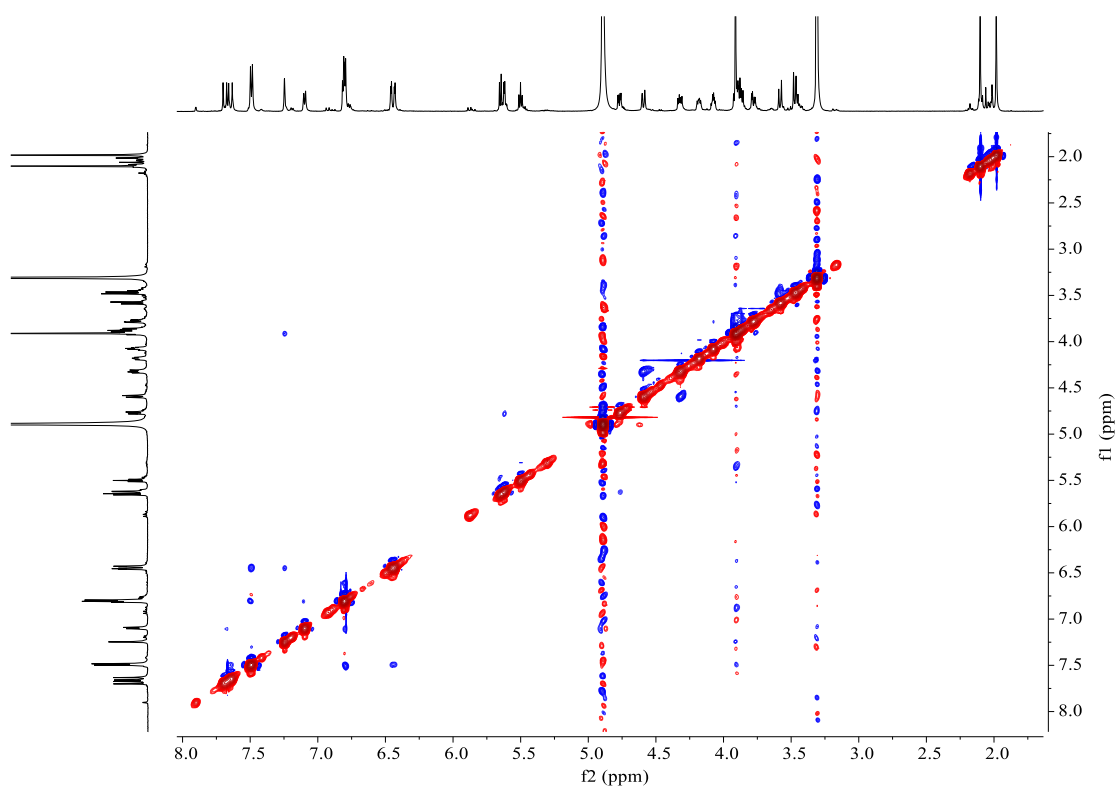

**Figure S199.** NOESY Spectrum of Compound **22** in MeOH- $d_4$

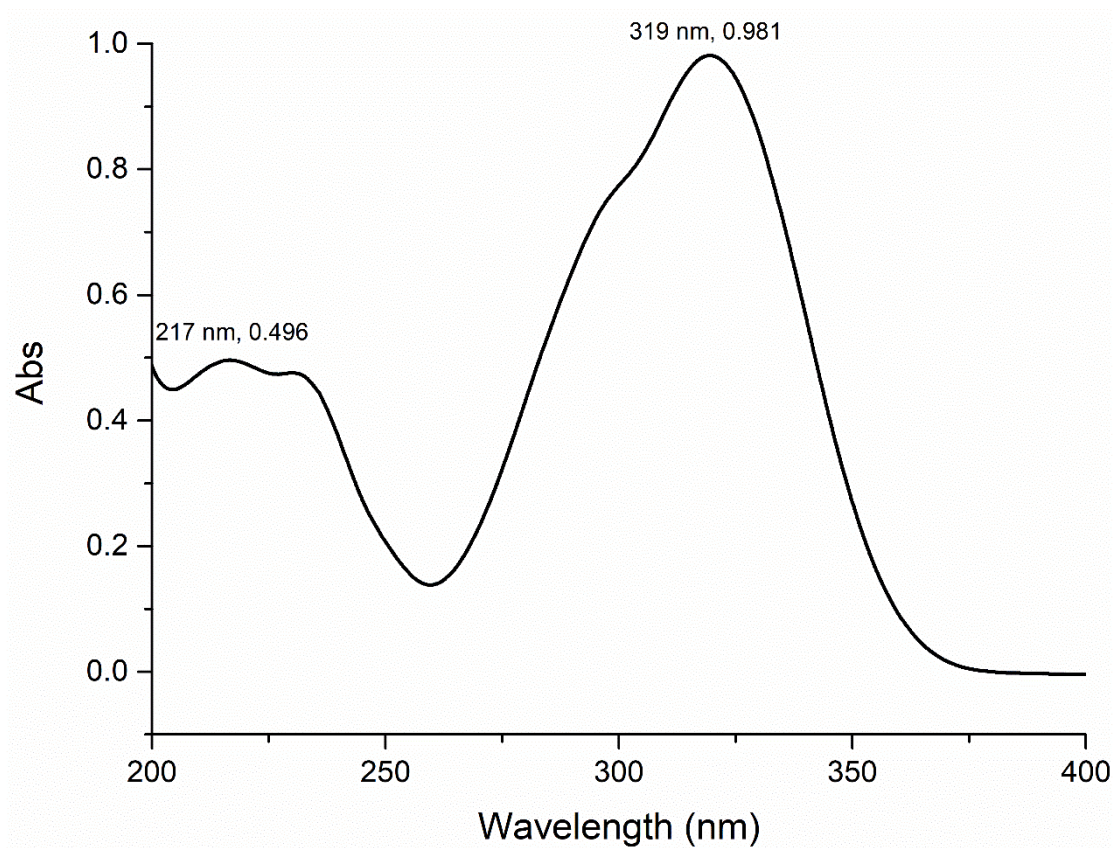

**Figure S200.** UV Spectrum of Compound **23**

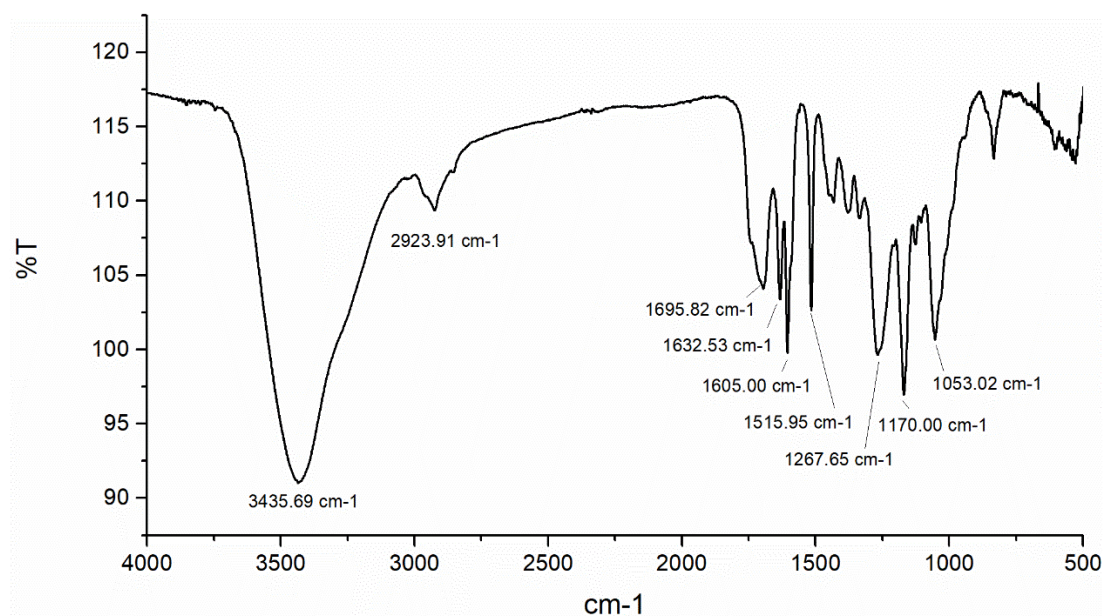

**Figure S201.** IR (KBr disc) Spectrum of Compound **23**

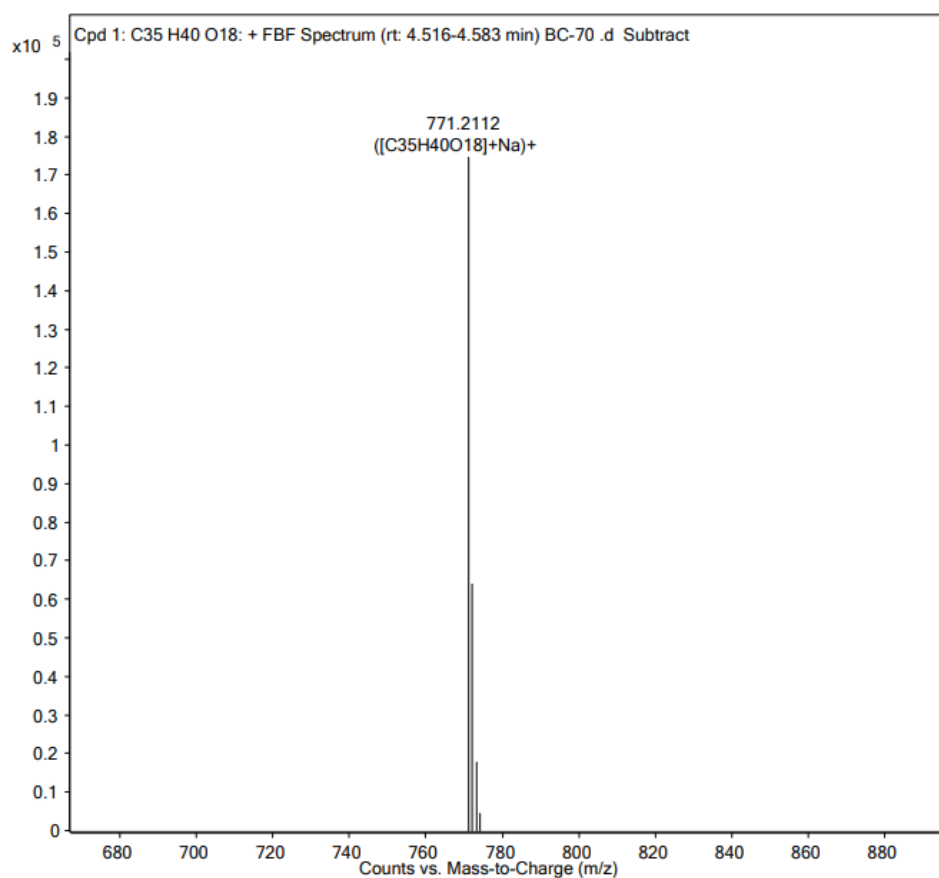

**Figure S202.** (+) HRESIMS Spectrum of Compound **23**

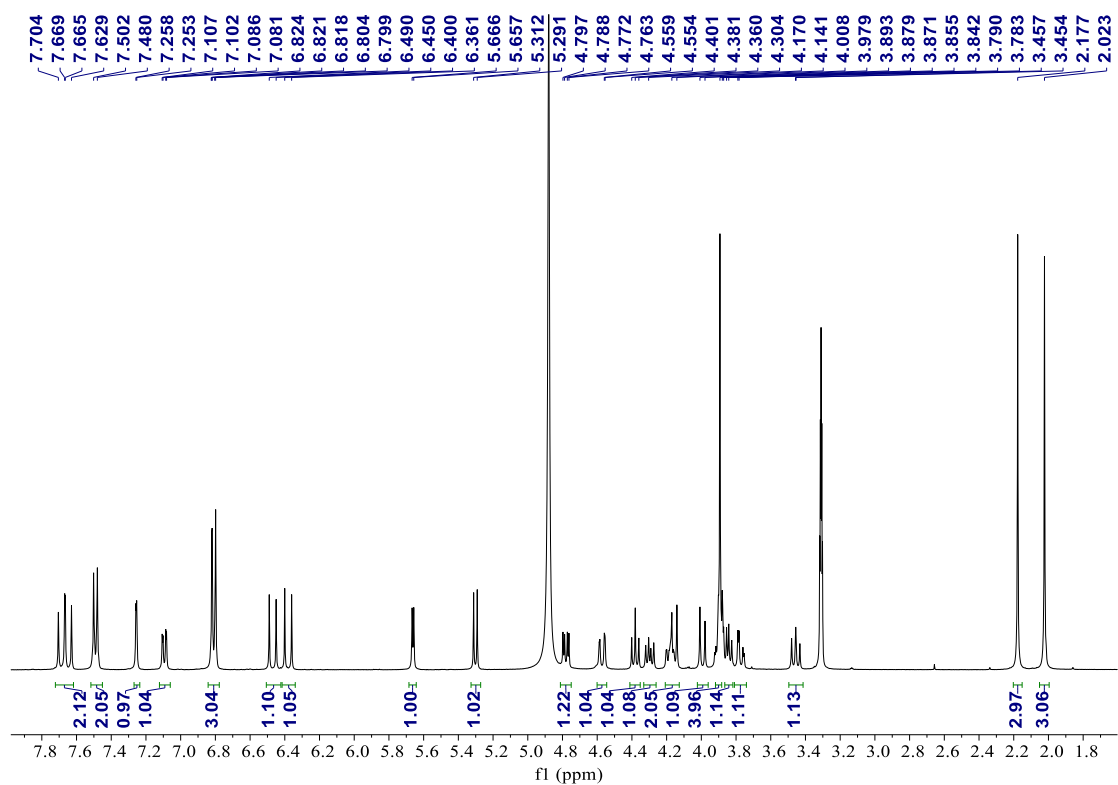

**Figure S203.**  $^1\text{H}$  NMR Spectrum of Compound **23** in  $\text{MeOH-}d_4$

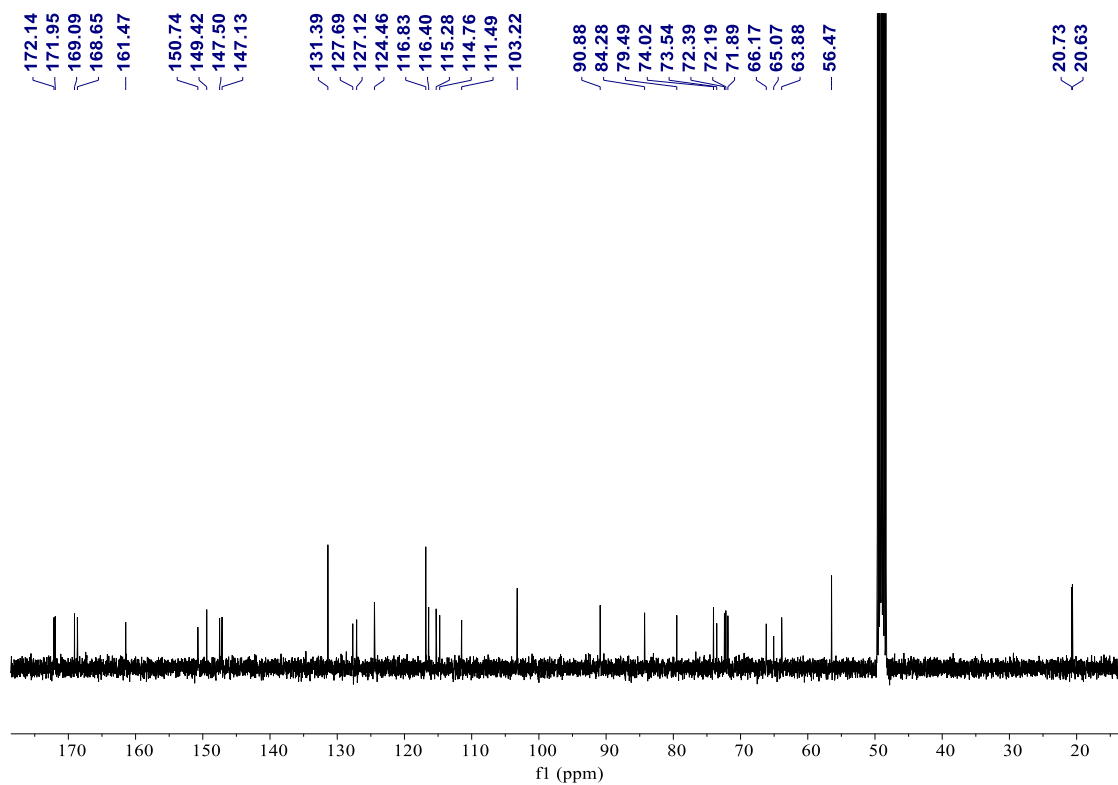

**Figure S204.**  $^{13}\text{C}$  NMR Spectrum of Compound **23** in  $\text{MeOH-}d_4$

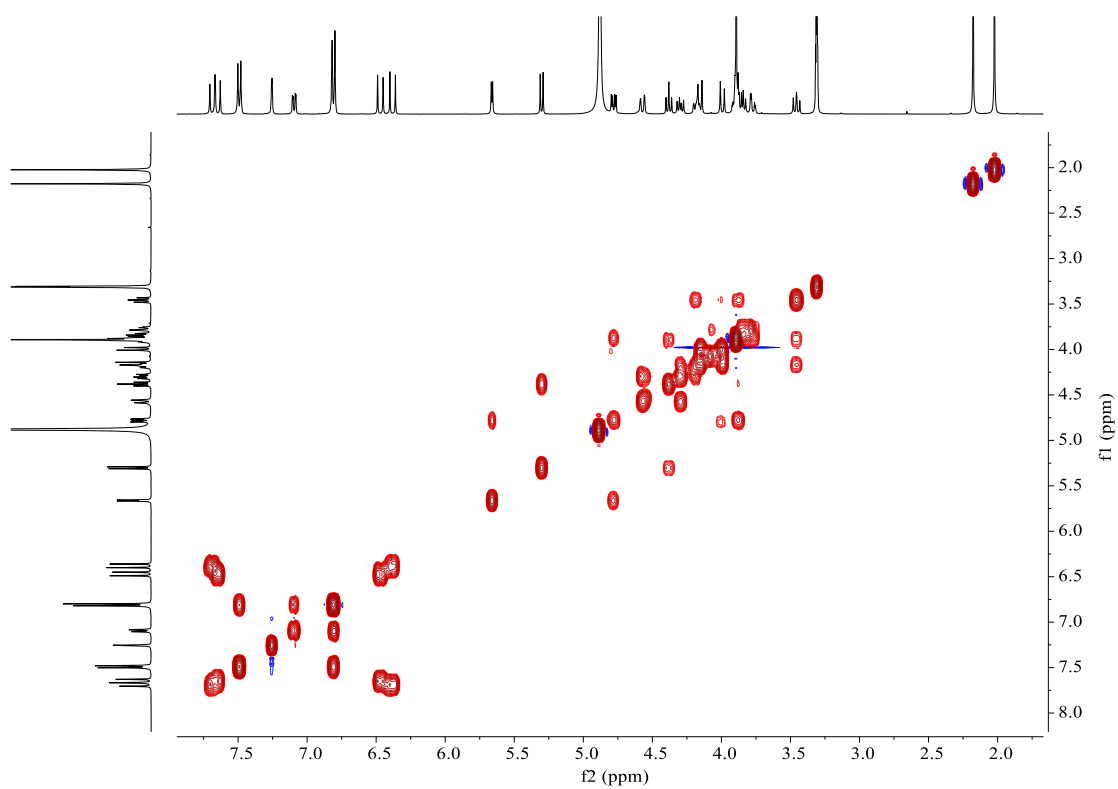

**Figure S205.**  $^1\text{H}$ - $^1\text{H}$  COSY Spectrum of Compound **23** in  $\text{MeOH-}d_4$

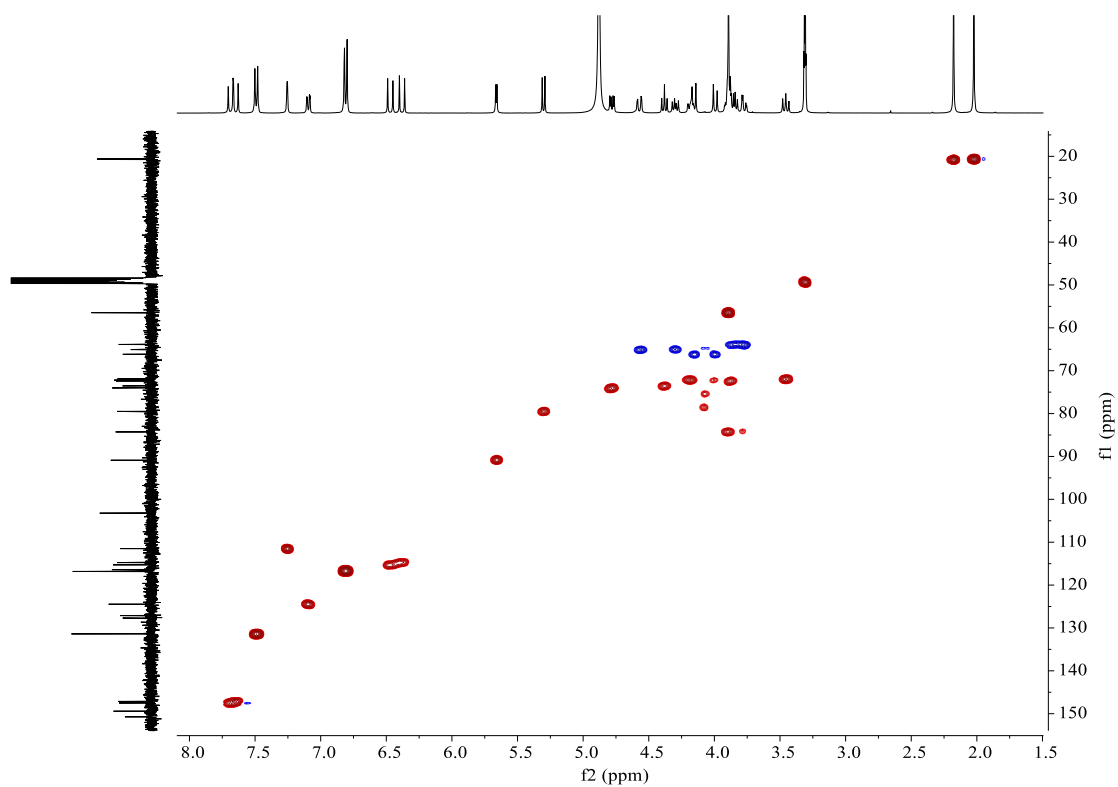

**Figure S206.** HSQC Spectrum of Compound **23** in  $\text{MeOH-}d_4$

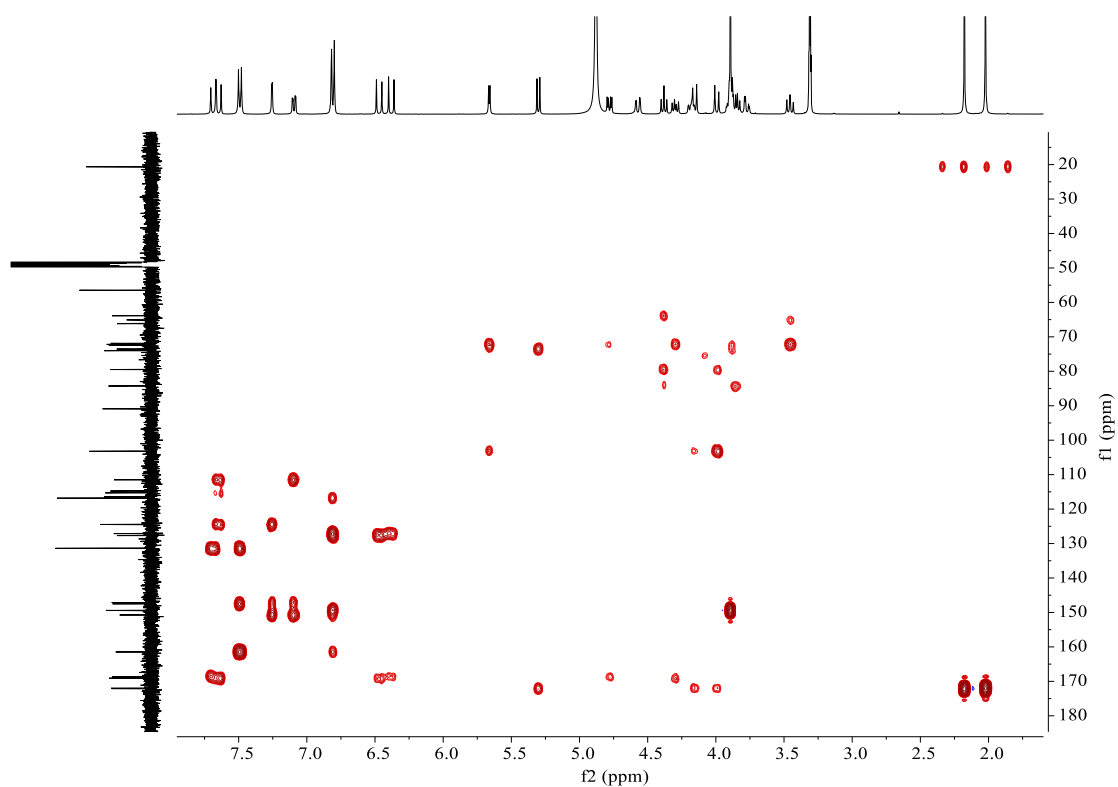

**Figure S207.** HMBC Spectrum of Compound **23** in MeOH- $d_4$

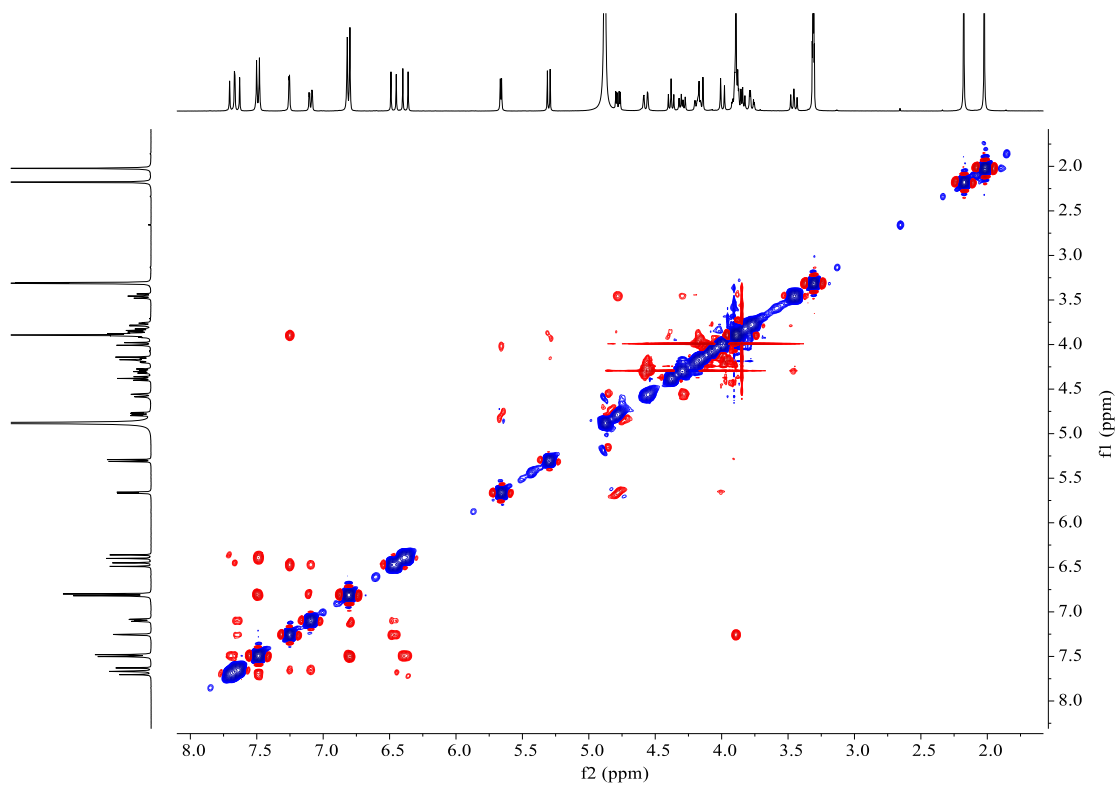

**Figure S208.** NOESY Spectrum of Compound **23** in MeOH- $d_4$

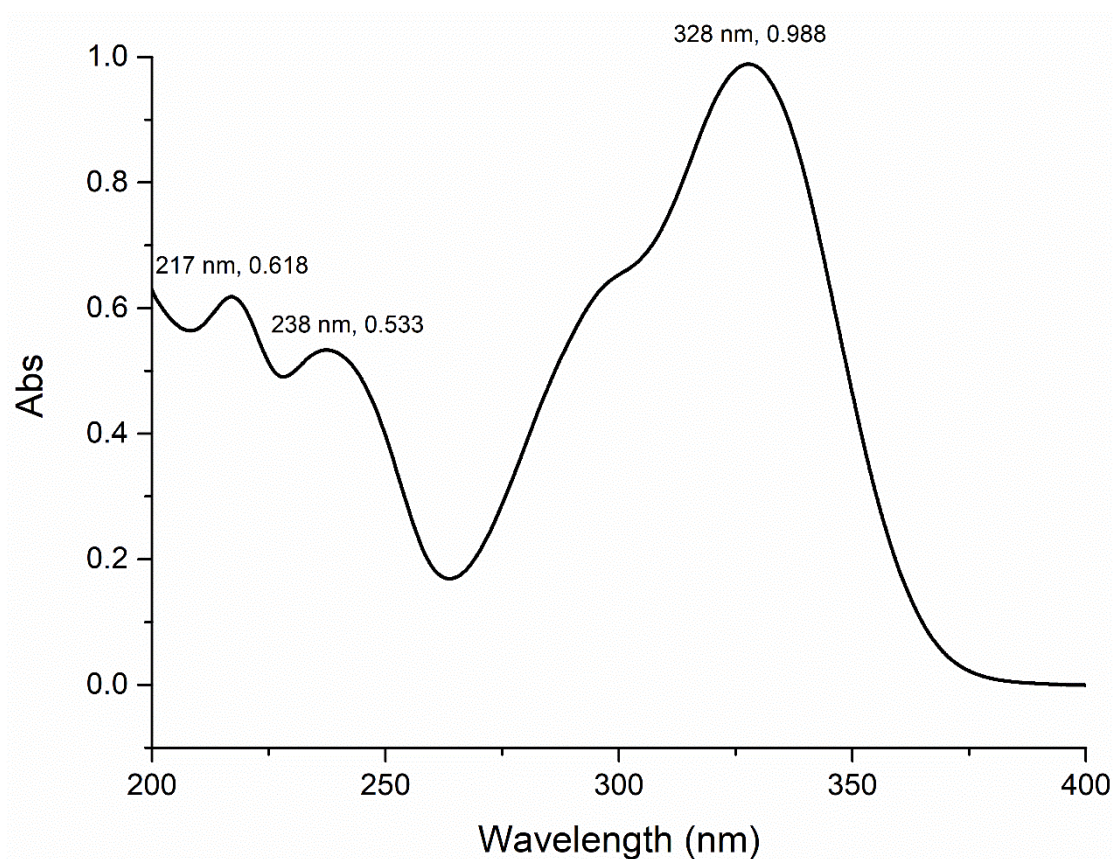

**Figure S209.** UV Spectrum of Compound **24**

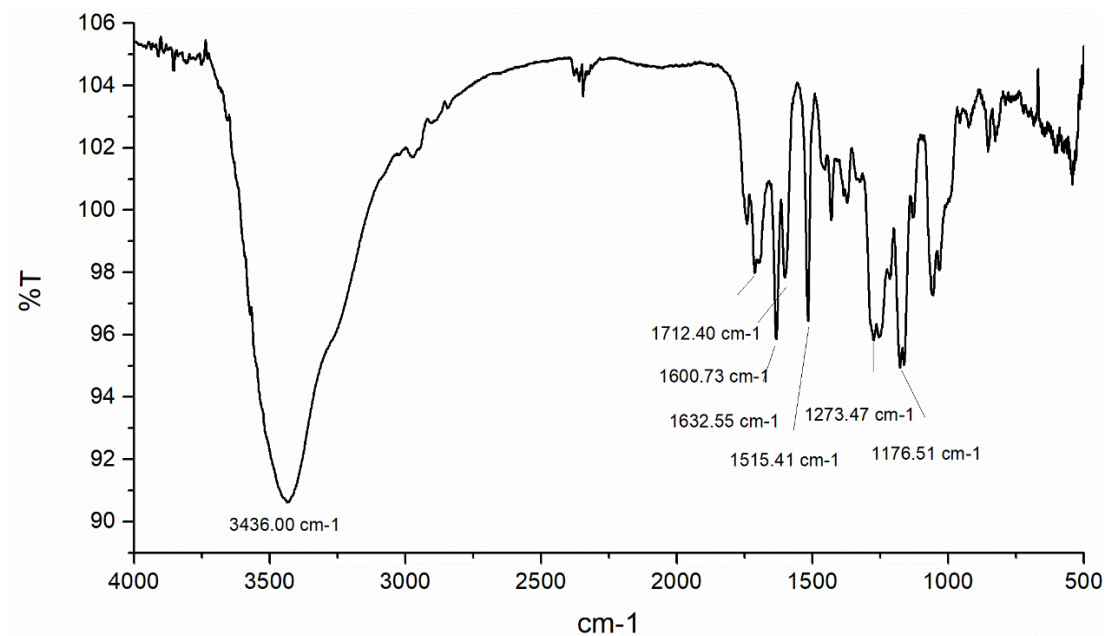

**Figure S210.** IR (KBr disc) Spectrum of Compound **24**



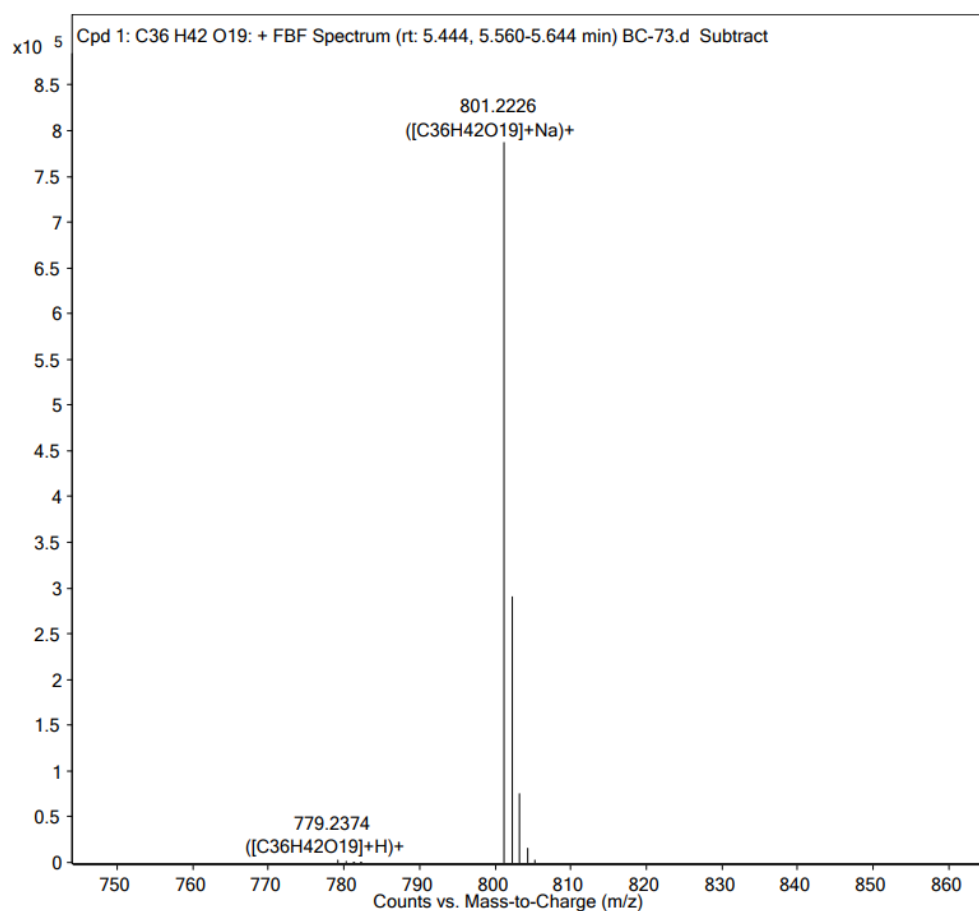

**Figure S211.** (+) HRESIMS Spectrum of Compound **24**

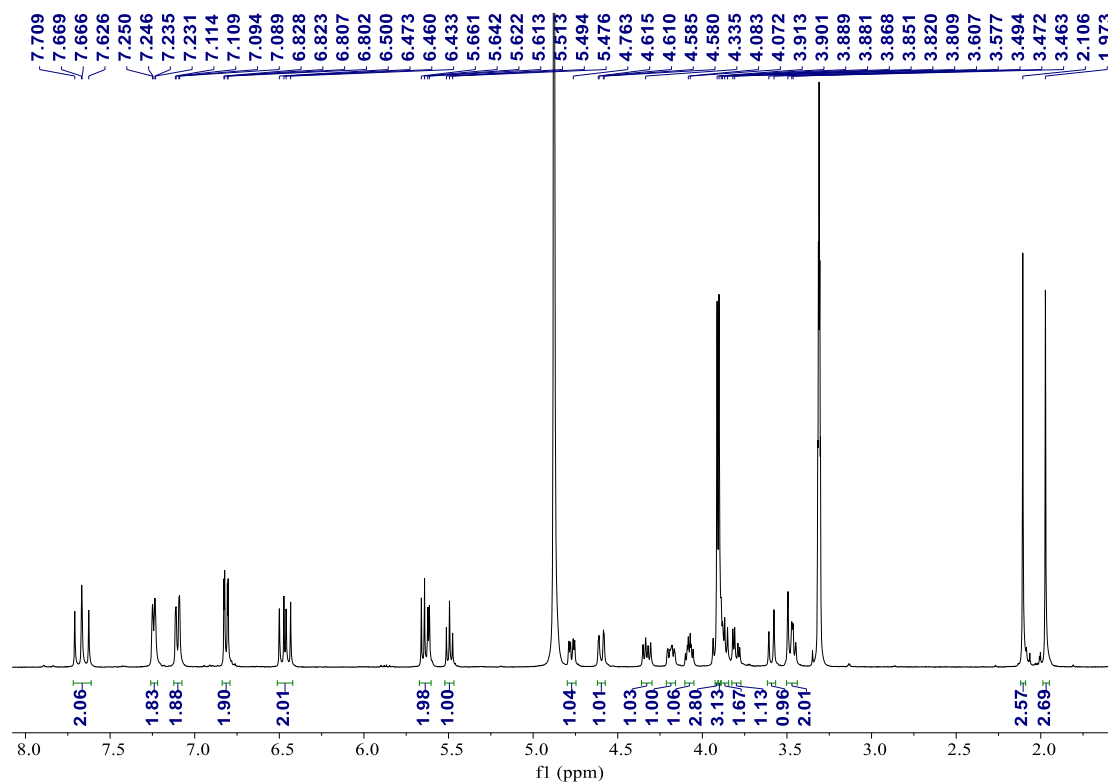

**Figure S212.**  $^1\text{H}$  NMR Spectrum of Compound **24** in  $\text{MeOH-}d_4$

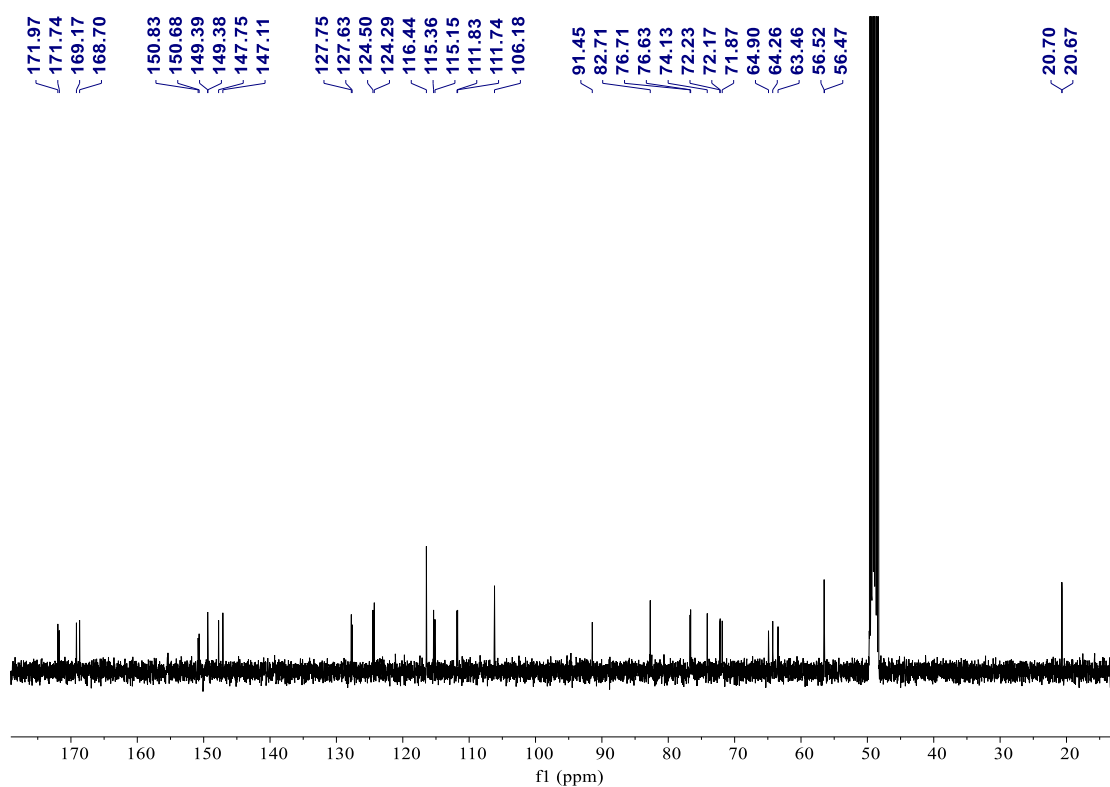

**Figure S213.**  $^{13}\text{C}$  NMR Spectrum of Compound **24** in  $\text{MeOH-}d_4$

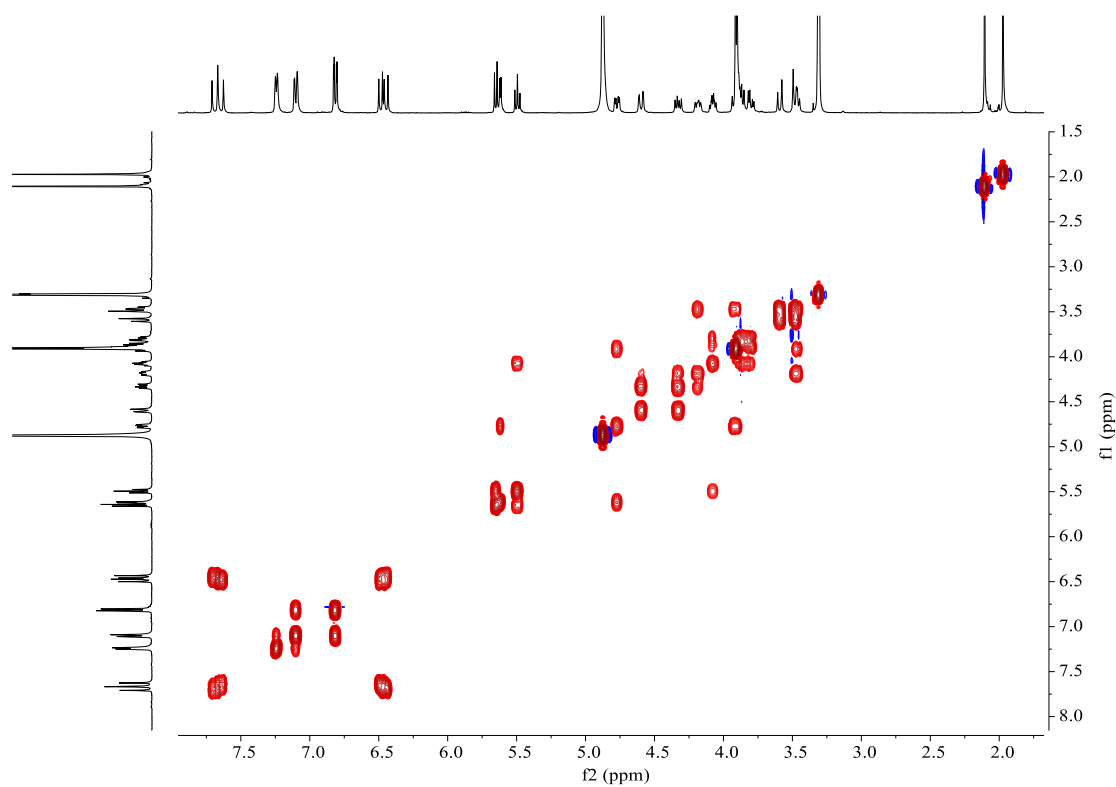

**Figure S214.**  $^1\text{H}$ – $^1\text{H}$  COSY Spectrum of Compound **24** in  $\text{MeOH-}d_4$

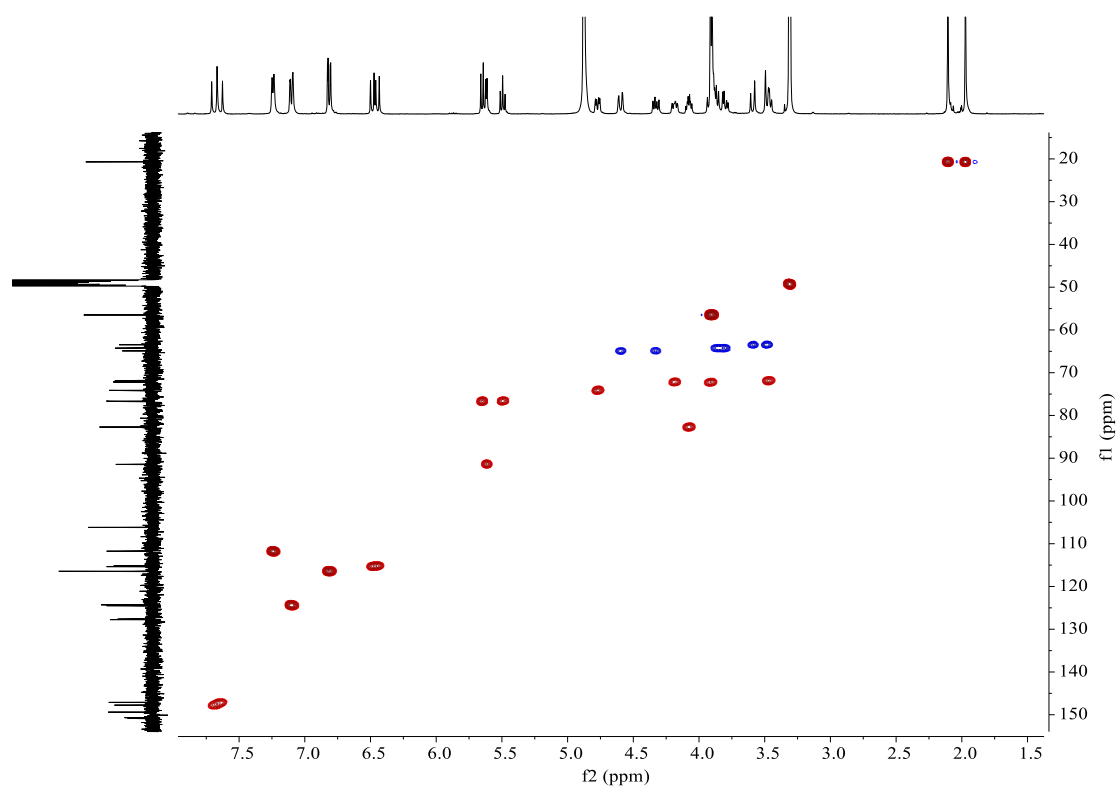

**Figure S215.** HSQC Spectrum of Compound **24** in MeOH- $d_4$

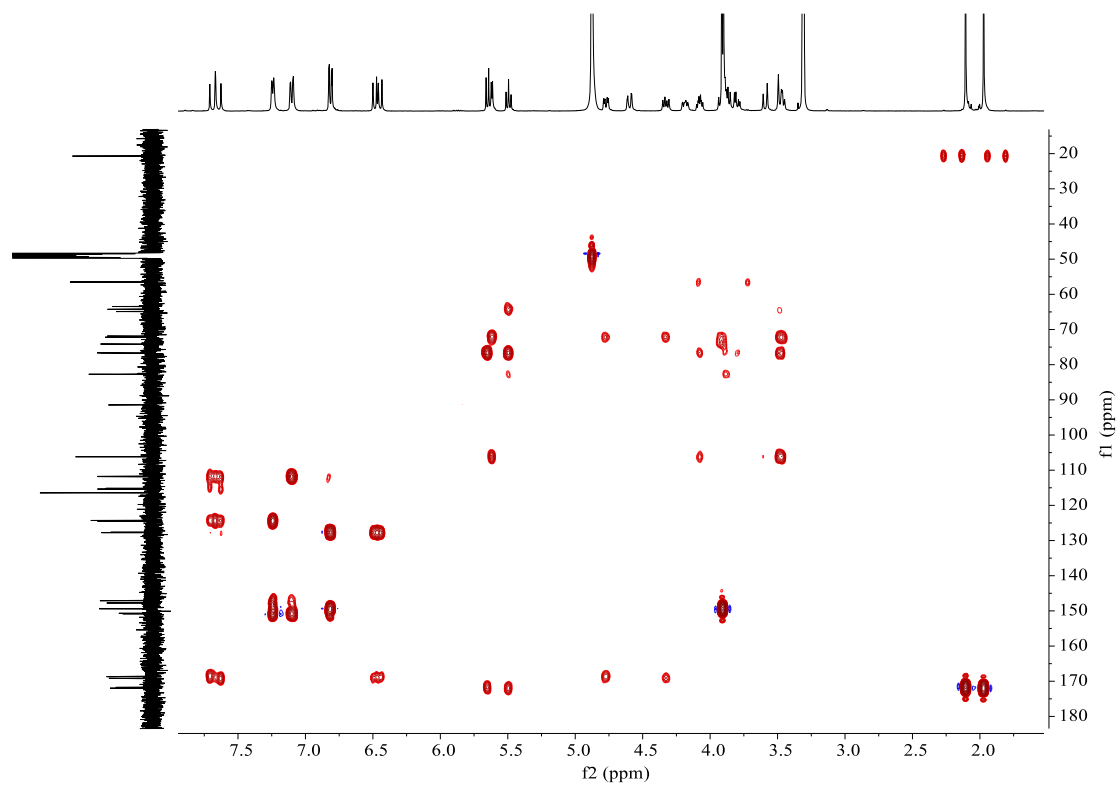

**Figure S216.** HMBC Spectrum of Compound **24** in MeOH- $d_4$

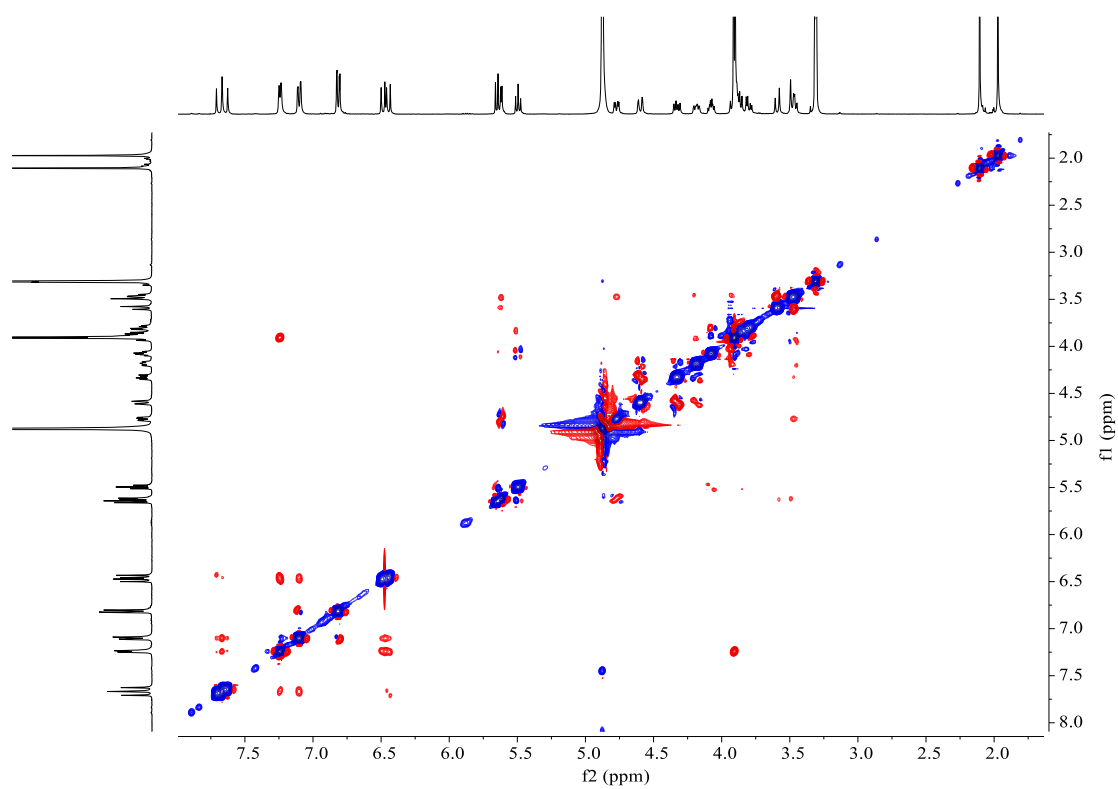

**Figure S217.** NOESY Spectrum of Compound **24** in MeOH- $d_4$
